# Supplementary material for: Surveying Tropical Faunal Diversity via Airborne DNA Analyses
Source: bioRxiv preprint, doi:10.1101/2025.07.25.666788, version 1 (2025-07-31)
Supplement: Supplemental Information [file 666788_file02.xlsx]

## Sheet: Table_S2
Table S2. Consensus taxonomy and read counts for each COI OTU and sample PCR replicate
OTU	Kingdom	Phylum	Class	Order	Family	Genus	Species	pctMatch	A1475.1	A1475.10	A1475.11	A1475.12	A1475.2	A1475.3	A1475.4	A1475.5	A1475.6	A1475.7	A1475.8	A1475.9	A1476.1	A1476.10	A1476.11	A1476.12	A1476.2	A1476.3	A1476.4	A1476.5	A1476.6	A1476.7	A1476.8	A1476.9	A1477.1	A1477.10	A1477.11	A1477.12	A1477.2	A1477.3	A1477.4	A1477.5	A1477.6	A1477.7	A1477.8	A1477.9	A1478.1	A1478.10	A1478.11	A1478.12	A1478.2
ESV_030595	Eukaryota	Arthropoda	Insecta					100	0	0	0	0	0	0	0	0	0	0	0	0	0	0	0	0	0	0	0	0	0	0	0	0	0	0	0	0	0	0	0	0	0	0	0	0	0	0	0	0	1
ESV_071595	Eukaryota	Arthropoda	Insecta	Lepidoptera	Lycaenidae	Arhopala	Arhopala sp. 1	100	0	0	0	0	0	0	0	0	0	0	0	0	0	0	0	0	0	0	0	0	0	0	0	0	0	0	0	0	0	0	0	0	0	0	0	0	0	0	0	2	0
ESV_336625	Eukaryota	Arthropoda	Insecta	Diptera	Ceratopogonidae	Culicoides	Culicoides sp. G HB-2016	99.7	0	0	0	0	0	0	0	0	0	0	0	0	0	0	0	0	0	0	0	0	0	0	0	0	0	0	0	0	0	0	0	0	0	0	0	0	0	0	0	0	0
ESV_337083	Eukaryota	Arthropoda	Insecta	Diptera	Chironomidae	Limnophyes		100	0	0	0	0	0	0	0	0	0	0	0	0	0	0	0	0	0	0	0	0	0	0	0	0	0	0	0	0	0	0	0	0	0	0	0	0	0	0	0	0	0
ESV_342280	Eukaryota	Arthropoda	Insecta	Coleoptera	Dermestidae	Anthrenus		100	0	0	0	0	0	0	0	0	0	0	0	0	0	0	0	0	0	0	0	1	0	0	0	0	0	0	0	0	0	0	0	0	0	0	0	0	0	0	0	0	0
ESV_342508	Eukaryota	Arthropoda	Insecta	Blattodea	Blattidae	Periplaneta	Periplaneta americana	100	0	0	0	0	0	0	0	0	0	0	0	0	0	0	0	0	0	0	0	0	0	0	0	0	0	0	0	0	0	0	0	0	0	0	0	0	0	0	0	0	0
ESV_343274	Eukaryota	Arthropoda	Insecta	Coleoptera	Corylophidae	Orthoperus	Orthoperus scutellaris	100	0	0	0	0	0	0	0	0	0	0	0	0	0	0	0	0	0	0	0	0	0	0	0	0	0	0	0	0	0	0	0	0	0	0	0	0	0	0	0	0	0
ESV_343280	Eukaryota	Arthropoda	Arachnida	Sarcoptiformes	Pyroglyphidae	Dermatophagoides		100	0	0	0	0	0	0	0	0	0	0	0	0	0	0	0	0	0	0	0	0	0	0	0	0	0	0	0	0	0	0	0	0	0	0	0	0	0	0	0	0	0
ESV_344045	Eukaryota	Arthropoda	Insecta	Thysanoptera	Thripidae			100	0	0	0	0	0	0	0	0	0	0	0	0	0	0	0	0	0	0	0	0	0	0	0	0	0	0	0	0	0	0	0	0	0	0	0	0	0	0	0	0	0
ESV_346825	Eukaryota	Arthropoda	Arachnida	Trombidiformes	Demodicidae	Demodex	Demodex brevis	98.7	0	0	0	0	0	0	0	0	0	0	0	0	0	0	0	0	0	0	0	0	0	0	0	0	0	0	0	0	0	0	0	0	0	0	0	0	0	0	0	0	0
ESV_426556	Eukaryota	Arthropoda	Insecta	Hymenoptera	Formicidae	Tapinoma	Tapinoma sessile	96.8	0	0	0	0	0	0	0	0	0	0	0	0	0	0	0	0	0	0	0	0	0	0	0	0	0	0	0	0	0	0	0	0	0	0	0	0	0	0	0	0	0
ESV_426570	Eukaryota	Arthropoda	Insecta	Hymenoptera	Formicidae	Tapinoma	Tapinoma sessile	100	0	0	0	0	0	0	0	0	0	0	0	0	0	0	0	0	0	0	0	0	0	0	0	0	0	0	0	0	0	0	0	0	0	0	0	0	0	0	0	0	0
ESV_426583	Eukaryota	Arthropoda	Insecta	Hymenoptera	Formicidae	Tapinoma	Tapinoma sessile	96.5	0	0	0	0	0	0	0	0	0	0	0	0	0	0	0	0	0	0	0	0	0	0	0	0	0	0	0	0	0	0	0	0	0	0	0	0	0	0	0	0	0
ESV_426627	Eukaryota	Arthropoda	Insecta	Hymenoptera	Formicidae	Tapinoma	Tapinoma sessile	94.6	0	0	0	0	0	0	0	0	0	0	0	0	0	0	0	0	0	0	0	0	0	0	0	0	0	0	0	0	0	0	0	0	0	0	0	0	0	0	0	0	0
ESV_426830	Eukaryota	Arthropoda	Insecta	Diptera	Cecidomyiidae			99	0	0	0	0	0	0	0	0	0	0	0	0	0	0	0	0	0	0	0	0	0	0	0	0	0	0	0	0	0	0	0	0	0	0	0	0	0	0	0	0	0
ESV_426881	Eukaryota	Arthropoda	Insecta	Diptera	Chironomidae	Tanytarsus	Tanytarsus volgensis	100	0	0	0	0	0	0	0	0	0	0	0	0	0	0	0	0	0	0	0	0	0	0	0	0	0	0	0	0	0	0	0	0	0	0	0	0	1	0	0	0	0
ESV_426915	Eukaryota	Arthropoda	Insecta	Diptera	Cecidomyiidae			99.4	0	0	0	0	0	0	0	0	0	0	0	0	0	0	0	0	0	0	0	0	0	0	0	0	0	0	0	0	0	0	0	0	0	0	0	0	0	0	0	0	0
ESV_426987	Eukaryota	Arthropoda	Insecta					99.7	0	0	0	0	0	0	0	0	0	0	0	0	0	0	0	0	0	0	0	0	0	0	0	0	0	0	0	0	0	0	0	0	0	0	0	0	0	0	0	0	0
ESV_427036	Eukaryota	Arthropoda	Insecta	Diptera	Cecidomyiidae			100	0	0	0	0	0	0	0	0	0	0	0	0	0	0	0	0	0	0	0	0	0	0	0	0	0	0	0	0	0	0	0	0	0	0	0	0	0	0	0	0	0
ESV_427038	Eukaryota	Arthropoda	Insecta	Diptera	Cecidomyiidae			100	0	0	0	0	0	0	0	0	0	0	0	0	0	19	0	1	0	0	0	0	0	0	1	0	0	0	0	0	0	0	0	0	0	0	0	0	0	0	0	0	0
ESV_427094	Eukaryota	Arthropoda	Insecta	Diptera	Cecidomyiidae			98.1	0	0	0	0	0	0	0	0	0	0	0	0	0	0	0	0	0	0	0	0	0	0	0	0	0	0	0	0	0	0	0	0	0	0	0	0	0	0	0	0	0
ESV_427103	Eukaryota	Arthropoda	Insecta	Diptera	Cecidomyiidae			99.4	0	0	0	0	0	0	0	0	0	0	0	0	0	0	0	0	0	0	0	0	0	0	0	0	0	0	0	0	0	0	0	0	0	0	0	0	0	0	0	0	0
ESV_427112	Eukaryota	Arthropoda	Insecta	Diptera	Psychodidae	Trichomyia		98.4	217	91	72	41	130	102	89	70	121	134	80	104	0	0	0	0	0	0	0	0	0	0	0	0	0	0	0	0	0	0	0	0	0	0	0	0	0	0	0	0	0
ESV_427206	Eukaryota	Arthropoda	Insecta	Diptera	Cecidomyiidae			100	0	0	0	0	0	0	0	0	0	0	0	0	0	0	0	0	0	0	0	0	0	0	0	0	0	0	0	0	0	0	0	0	0	0	0	0	0	0	0	0	0
ESV_427208	Eukaryota	Arthropoda	Arachnida	Trombidiformes	Demodicidae	Demodex	Demodex folliculorum	100	0	0	0	0	0	0	0	0	0	0	0	0	0	0	0	0	0	0	0	0	0	0	0	0	0	0	0	0	0	0	0	0	0	0	0	0	0	0	0	0	0
ESV_427229	Eukaryota	Arthropoda	Insecta	Diptera	Cecidomyiidae			98.4	0	0	0	0	0	0	0	0	0	0	0	0	0	0	0	0	0	0	0	0	0	0	0	0	9	9	3	2	3	5	6	8	11	7	8	8	0	0	0	0	0
ESV_427269	Eukaryota	Arthropoda	Insecta	Diptera	Cecidomyiidae			99	0	0	0	0	0	0	0	0	0	0	0	0	0	0	0	0	0	0	0	0	0	0	0	0	0	0	0	0	0	0	0	0	0	0	0	0	0	0	0	0	0
ESV_427352	Eukaryota	Arthropoda	Insecta	Diptera	Cecidomyiidae			99.4	0	0	0	0	0	0	0	0	0	0	0	0	0	0	0	0	0	0	0	0	0	0	0	0	0	0	0	0	0	0	0	0	0	0	0	0	0	0	0	0	0
ESV_427367	Eukaryota	Arthropoda	Insecta	Diptera	Cecidomyiidae			98.7	0	0	0	0	0	0	0	0	0	0	0	0	0	0	0	0	0	0	0	0	0	0	0	0	0	0	0	0	0	0	0	0	0	0	0	0	0	0	0	0	0
ESV_427393	Eukaryota	Arthropoda	Insecta	Diptera	Cecidomyiidae			95.2	0	0	0	0	0	0	0	0	0	0	0	0	0	0	0	0	0	0	0	0	0	0	0	0	0	0	0	0	0	0	0	0	0	0	0	0	0	0	0	0	0
ESV_427396	Eukaryota	Arthropoda	Insecta	Diptera	Cecidomyiidae			99.7	0	0	0	0	0	0	0	0	0	0	0	0	0	0	0	0	0	0	0	0	0	0	0	0	0	0	0	0	0	0	0	0	0	0	0	0	0	0	0	0	0
ESV_427408	Eukaryota	Arthropoda	Malacostraca	Isopoda				99.4	0	0	0	0	0	0	0	0	0	0	0	0	0	0	0	0	0	0	0	0	0	0	0	0	0	0	0	0	0	0	0	0	0	0	0	0	0	0	0	0	0
ESV_427504	Eukaryota	Arthropoda	Insecta	Diptera	Cecidomyiidae			99.7	0	0	0	0	0	0	0	0	0	0	0	0	0	0	0	0	0	0	0	0	0	0	0	0	0	0	0	0	0	0	0	0	0	0	0	0	0	0	0	0	0
ESV_427510	Eukaryota	Arthropoda	Insecta	Diptera	Cecidomyiidae			100	0	0	0	0	0	0	0	0	0	0	0	0	0	0	0	0	0	0	0	0	0	0	0	0	0	0	0	1	0	0	8	0	0	0	0	7	0	0	0	0	0
ESV_427529	Eukaryota	Arthropoda	Insecta	Diptera	Cecidomyiidae			100	0	0	0	0	0	0	0	0	0	0	0	0	0	0	0	0	0	0	0	0	0	0	0	0	0	0	0	0	0	0	0	0	0	0	0	0	0	0	0	0	0
ESV_427531	Eukaryota	Arthropoda	Insecta	Diptera	Cecidomyiidae			98.1	0	0	0	0	0	0	0	0	0	0	0	0	0	0	0	0	0	0	0	0	0	0	0	0	0	0	0	0	0	0	0	0	0	0	0	0	0	0	0	0	0
ESV_427550	Eukaryota	Arthropoda	Insecta	Diptera	Cecidomyiidae			100	0	0	0	0	0	0	0	0	0	0	0	0	0	0	0	0	0	0	0	0	0	0	0	0	0	0	0	0	0	0	0	0	0	0	0	0	0	0	0	0	0
ESV_427552	Eukaryota	Arthropoda	Insecta	Diptera	Cecidomyiidae			95.8	0	0	0	0	0	0	0	0	0	0	0	0	0	0	0	0	0	0	0	0	0	0	0	0	0	0	0	0	0	0	0	0	0	0	0	0	0	0	0	0	0
ESV_427555	Eukaryota	Arthropoda	Insecta	Diptera	Cecidomyiidae			99.7	0	0	0	0	0	0	0	0	0	0	0	0	0	0	0	0	0	0	0	0	0	0	0	0	0	0	0	0	0	0	0	0	0	0	0	0	0	0	0	0	0
ESV_427557	Eukaryota	Arthropoda	Insecta	Diptera	Cecidomyiidae			95.5	0	0	0	0	0	0	0	0	0	0	0	0	0	0	0	0	0	0	0	0	0	0	0	0	0	0	0	0	0	0	0	0	0	0	0	0	0	0	0	0	0
ESV_427561	Eukaryota	Arthropoda	Insecta	Diptera	Cecidomyiidae			93.6	0	0	0	0	0	0	0	0	0	0	0	0	0	0	0	0	0	0	0	0	0	0	0	0	0	0	0	0	0	0	0	0	0	0	0	0	0	0	0	0	0
ESV_427562	Eukaryota	Arthropoda	Insecta	Diptera	Cecidomyiidae			99.7	0	0	0	0	0	0	0	0	0	0	0	0	0	0	0	0	0	0	0	0	0	0	0	0	0	0	0	0	0	0	0	0	0	0	0	0	0	0	0	0	0
ESV_427590	Eukaryota	Arthropoda	Insecta	Hymenoptera	Colletidae	Lonchopria	Lonchopria robertsi	93	1	0	0	1	0	10	884	0	0	1	0	0	0	2	1	2	7	2	0	3	1	3	4	47	0	0	1	0	0	0	10	0	6	0	0	2	2	8	8	2	7
ESV_427610	Eukaryota	Arthropoda	Arachnida	Trombidiformes	Tydeidae			86.6	0	0	0	0	0	0	0	0	0	0	0	0	0	0	0	0	0	0	0	0	0	0	0	0	0	0	0	0	0	0	0	0	0	0	0	0	0	1	4	2	5
ESV_427620	Eukaryota	Arthropoda	Insecta	Lepidoptera				89.5	0	0	0	0	0	0	0	0	0	0	0	0	0	0	0	0	0	0	0	0	0	0	0	0	0	0	0	0	0	0	0	0	0	0	0	0	1	0	0	0	0
ESV_427626	Eukaryota	Arthropoda	Insecta	Diptera	Cecidomyiidae			97.1	0	0	0	0	0	0	0	0	0	0	0	0	213	11	24	31	19	18	18	14	13	23	30	16	0	0	0	0	0	0	0	0	0	0	0	0	2	3	0	0	2
ESV_427631	Eukaryota	Arthropoda	Insecta	Diptera	Cecidomyiidae			99.4	0	0	0	0	0	0	0	0	0	0	0	0	0	0	0	0	0	0	0	0	0	0	0	0	0	0	0	0	0	0	0	0	0	0	0	0	0	0	0	0	0
ESV_427642	Eukaryota	Arthropoda	Insecta	Lepidoptera				96.5	0	0	0	0	0	0	0	0	0	0	0	0	0	0	0	0	0	0	0	0	0	0	0	0	0	0	0	0	0	0	0	0	0	0	0	0	0	0	0	0	0
ESV_427744	Eukaryota	Arthropoda	Insecta	Lepidoptera	Geometridae	Casbia	Casbia carnecostata	85.3	0	0	0	0	0	0	0	0	0	0	0	0	0	0	0	0	0	0	0	0	0	0	0	0	0	0	0	0	0	0	0	0	0	0	0	0	0	0	0	0	0
ESV_427839	Eukaryota	Arthropoda	Insecta	Diptera	Cecidomyiidae			94.2	0	0	0	0	0	0	0	0	0	0	0	0	0	0	0	0	0	0	0	0	0	0	0	0	0	0	0	0	0	0	0	0	0	0	0	0	0	0	0	0	0
ESV_427906	Eukaryota	Arthropoda	Insecta	Diptera	Cecidomyiidae			93.3	0	0	0	0	0	0	0	0	0	0	0	0	0	0	0	0	0	0	0	0	0	0	0	0	0	0	0	0	0	0	0	0	0	0	0	0	0	0	0	0	0
ESV_427913	Eukaryota	Arthropoda	Insecta	Diptera	Cecidomyiidae			99.7	89	6	6	4	15	17	12	8	37	25	19	16	0	0	0	0	0	0	0	0	0	0	0	0	0	0	0	0	0	0	0	0	0	0	0	0	0	0	0	0	0
ESV_427915	Eukaryota	Arthropoda	Insecta	Diptera				93.3	3959	261	318	128	452	337	333	226	378	393	292	376	0	0	0	0	0	0	0	0	0	0	0	0	0	0	0	0	0	0	0	0	0	0	0	0	0	0	0	0	0
ESV_427929	Eukaryota	Arthropoda	Insecta	Diptera	Chironomidae			97.7	85300	4367	4025	2873	3556	4094	3549	2826	4098	4958	3748	4591	0	0	0	0	0	0	0	0	0	0	0	0	0	0	0	0	0	0	0	0	0	0	0	0	0	0	0	0	0
ESV_427932	Eukaryota	Arthropoda	Insecta	Hemiptera	Diaspididae			91.8	274	17	13	2	29	22	25	9	30	38	29	28	0	0	0	0	0	0	0	0	0	0	0	0	0	0	0	0	0	0	0	0	0	0	0	0	0	0	0	0	0
ESV_427939	Eukaryota	Arthropoda	Insecta	Hymenoptera	Mymaridae			93.1	60	0	3	1	10	3	4	1	13	12	4	13	0	0	0	0	0	0	0	0	0	0	0	0	0	0	0	0	0	0	0	0	0	0	0	0	0	0	0	0	0
ESV_427958	Eukaryota	Arthropoda	Collembola	Entomobryomorpha	Entomobryidae			100	30	5	6	2	7	7	2	3	8	9	5	5	0	0	0	0	0	0	0	0	0	0	0	0	0	0	0	0	0	0	0	0	0	0	0	0	0	0	0	0	0
ESV_427959	Eukaryota	Arthropoda	Insecta	Hemiptera	Aleyrodidae			93	55	5	10	11	8	8	4	7	13	17	16	9	0	0	0	0	0	0	0	0	0	0	0	0	0	0	0	0	0	0	0	0	0	0	0	0	0	0	0	0	0
ESV_427975	Eukaryota	Arthropoda	Insecta	Diptera	Cecidomyiidae			96.2	0	0	0	0	0	0	0	0	0	0	0	0	256	23	25	41	33	25	27	14	26	26	32	16	0	0	0	0	0	0	0	0	0	0	0	0	0	0	0	0	0
ESV_427976	Eukaryota	Arthropoda	Insecta	Diptera	Cecidomyiidae			98.4	0	0	0	0	0	0	0	0	0	0	0	0	142	17	43	21	38	17	42	15	31	42	23	14	0	0	0	0	0	0	0	0	0	0	0	0	0	0	0	0	0
ESV_427977	Eukaryota	Arthropoda	Insecta	Diptera	Cecidomyiidae			98.1	0	0	0	0	0	0	0	0	0	0	0	0	1131	112	162	119	141	71	102	58	104	112	133	57	0	0	0	0	0	0	0	0	0	0	0	0	0	0	0	0	0
ESV_427978	Eukaryota	Arthropoda	Insecta	Diptera				94.2	0	0	0	0	0	0	0	0	0	0	0	0	667	93	100	90	70	47	65	36	64	87	70	43	0	0	0	0	0	0	0	0	0	0	0	0	0	0	0	0	0
ESV_427983	Eukaryota	Arthropoda	Insecta	Lepidoptera				88.8	0	0	0	0	0	0	0	0	0	0	0	0	87	4	14	12	18	7	9	5	10	9	7	9	0	0	0	0	0	0	0	0	0	0	0	0	0	0	0	0	0
ESV_427994	Eukaryota	Arthropoda	Insecta	Diptera	Cecidomyiidae			96.5	0	0	0	0	0	0	0	0	0	0	0	0	28	0	5	1	6	3	3	2	3	3	5	0	0	0	0	0	0	0	0	0	0	0	0	0	0	0	0	0	0
ESV_427997	Eukaryota	Arthropoda	Insecta	Diptera	Cecidomyiidae			100	0	0	0	0	0	0	0	0	0	0	0	0	621	87	85	98	81	59	74	49	77	76	72	58	0	0	0	0	0	0	0	0	0	0	0	0	0	0	0	0	0
ESV_428001	Eukaryota	Arthropoda	Insecta	Diptera	Cecidomyiidae			99.4	0	0	0	0	0	0	0	0	0	0	0	0	6695	909	603	709	499	412	401	297	370	418	364	351	0	0	0	0	0	0	0	0	0	0	0	0	0	0	0	0	0
ESV_428035	Eukaryota	Arthropoda	Insecta	Diptera	Cecidomyiidae			95.2	0	0	0	0	0	0	0	0	0	0	0	0	47	2	9	6	8	12	6	3	7	13	8	7	0	0	0	0	0	0	0	0	0	0	0	0	0	0	0	0	0
ESV_428037	Eukaryota	Arthropoda	Insecta	Diptera	Cecidomyiidae			94.9	0	0	0	0	0	0	0	0	0	0	0	0	11	16	4	2	8	2	3	4	4	3	9	1	0	0	0	0	0	0	0	0	0	0	0	0	0	0	0	0	0
ESV_428041	Eukaryota	Arthropoda	Insecta	Diptera	Cecidomyiidae			98.4	0	0	0	0	0	0	0	0	0	0	0	0	11	0	0	1	1	1	1	0	0	1	0	1	0	0	0	0	0	0	0	0	0	0	0	0	0	0	0	0	0
ESV_428074	Eukaryota	Arthropoda	Insecta	Diptera	Cecidomyiidae			95.5	0	0	0	0	0	0	0	0	0	0	0	0	66	16	15	12	16	9	7	8	12	11	18	9	0	0	0	0	0	0	0	0	0	0	0	0	0	0	0	0	0
ESV_428090	Eukaryota	Arthropoda	Insecta	Diptera	Cecidomyiidae			99.7	0	0	0	0	0	0	0	0	0	0	0	0	33	4	1	4	5	3	2	2	5	6	4	2	0	0	0	0	0	0	0	0	0	0	0	0	0	0	0	0	0
ESV_428095	Eukaryota	Arthropoda	Insecta	Diptera	Cecidomyiidae			95.8	0	0	0	0	0	0	0	0	0	0	0	0	23	2	2	3	1	7	5	3	2	6	6	4	0	0	0	0	0	0	0	0	0	0	0	0	0	0	0	0	0
ESV_428101	Eukaryota	Arthropoda	Insecta	Diptera	Cecidomyiidae			95.5	0	0	0	0	0	0	0	0	0	0	0	0	0	0	0	0	0	0	0	0	0	0	0	0	646	167	139	130	82	82	74	59	85	133	93	70	0	0	0	0	1
ESV_428105	Eukaryota	Arthropoda	Insecta	Diptera	Cecidomyiidae			99.4	0	0	0	0	0	0	0	0	0	0	0	0	0	0	0	0	0	0	0	0	0	0	0	0	102	69	80	66	48	53	42	32	51	85	52	31	0	0	0	0	0
ESV_428107	Eukaryota	Arthropoda	Insecta	Diptera	Cecidomyiidae			99.4	0	0	0	0	0	0	0	0	0	0	0	0	0	0	0	0	0	0	0	0	0	0	0	0	701	63	69	74	50	55	28	40	30	61	53	34	0	0	0	0	0
ESV_428108	Eukaryota	Arthropoda	Insecta	Diptera	Cecidomyiidae			98.7	0	0	0	0	0	0	0	0	0	0	0	0	0	0	0	0	0	0	0	0	0	0	0	0	506	53	86	57	61	30	57	36	52	62	44	25	0	0	0	0	0
ESV_428117	Eukaryota	Arthropoda	Insecta	Diptera	Cecidomyiidae			98.1	0	0	0	0	0	0	0	0	0	0	0	0	0	0	0	0	0	0	0	0	0	0	0	0	1130	79	71	76	49	36	41	41	59	80	50	53	1	5	2	3	1
ESV_428142	Eukaryota	Arthropoda	Insecta	Diptera	Cecidomyiidae			97.1	0	0	0	0	0	0	0	0	0	0	0	0	0	0	0	0	0	0	0	0	0	0	0	0	40	7	9	4	6	14	7	13	9	9	15	10	0	0	0	0	0
ESV_428147	Eukaryota	Arthropoda	Insecta	Diptera	Cecidomyiidae			96.5	0	0	0	0	0	0	0	0	0	0	0	0	0	0	0	0	0	0	0	0	0	0	0	0	132	87	39	20	17	25	18	13	26	31	31	13	0	0	0	0	0
ESV_428172	Eukaryota	Arthropoda	Insecta	Diptera	Cecidomyiidae			98.7	0	0	0	0	0	0	0	0	0	0	0	0	0	0	0	0	0	0	0	0	0	0	0	0	61	6	9	7	6	8	8	10	11	17	11	9	0	0	0	0	0
ESV_428173	Eukaryota	Arthropoda	Insecta	Diptera	Cecidomyiidae			98.7	0	0	0	0	0	0	0	0	0	0	0	0	0	0	0	0	708	2	30	0	0	0	0	0	2	19	6	8	4	32	4	12	30	10	25	14	0	0	0	0	0
ESV_428180	Eukaryota	Arthropoda	Insecta	Diptera	Cecidomyiidae			96.2	0	0	0	0	0	0	0	0	0	0	0	0	0	0	0	0	0	0	0	0	0	0	0	0	9	7	6	15	6	11	4	6	4	5	5	1	0	0	0	0	0
ESV_428189	Eukaryota	Arthropoda	Insecta	Thysanoptera				86.8	0	0	0	0	0	0	0	0	0	0	0	0	0	0	0	0	0	0	0	0	0	0	0	0	0	0	0	0	0	0	0	0	0	0	0	0	164	14	14	18	18
ESV_428198	Eukaryota	Arthropoda	Insecta	Diptera	Cecidomyiidae			98.1	0	0	0	0	0	0	0	0	0	0	0	0	0	0	0	0	0	0	0	0	0	0	0	0	0	0	0	0	0	0	0	0	0	0	0	0	192	18	21	12	29
ESV_428229	Eukaryota	Chordata	Mammalia	Carnivora	Procyonidae	Nasua	Nasua narica	91.1	2	254	0	1	1	2	0	1	1	10	7	5	0	2	0	0	0	0	0	0	0	0	0	0	0	0	0	1	0	0	5	1	0	0	0	0	28	22	9	9	14
ESV_428236	Eukaryota	Arthropoda	Insecta	Diptera	Cecidomyiidae			98.4	0	0	0	0	0	0	0	0	0	0	0	0	0	0	0	0	0	0	0	0	0	0	0	0	0	0	0	0	0	0	0	0	0	0	0	0	70	7	8	7	12
ESV_428240	Eukaryota	Arthropoda	Insecta	Lepidoptera				86.6	71	19	7	7	21	20	14	8	23	27	15	21	14	8	6	9	7	3	5	3	3	0	4	3	0	0	0	0	0	0	0	0	0	0	0	0	234	14	18	14	23
ESV_428274	Eukaryota	Arthropoda	Insecta	Diptera	Cecidomyiidae			100	0	0	0	0	0	0	0	0	0	0	0	0	0	0	0	0	0	0	0	0	0	0	0	0	0	871	0	0	0	0	0	0	0	2	0	0	3	29	12	3	17
ESV_428296	Eukaryota	Arthropoda	Insecta	Diptera	Cecidomyiidae			100	0	0	0	0	0	0	0	0	0	0	0	0	0	0	0	0	0	0	0	0	0	0	0	0	0	0	0	0	0	0	0	0	0	0	0	0	0	0	0	0	0
ESV_428297	Eukaryota	Arthropoda	Insecta	Diptera	Cecidomyiidae			94.9	0	0	0	0	0	0	0	0	0	0	0	0	0	0	0	0	0	0	0	0	0	0	0	0	0	0	0	0	0	0	0	0	0	0	0	0	0	0	0	0	0
ESV_428298	Eukaryota	Arthropoda	Insecta	Diptera	Cecidomyiidae			100	0	0	0	0	0	0	0	0	0	0	0	0	0	0	0	0	0	0	0	0	0	0	0	0	0	0	0	0	0	0	0	0	0	0	0	0	0	0	0	0	0
ESV_428301	Eukaryota	Arthropoda	Insecta	Diptera	Cecidomyiidae			95.2	0	0	0	0	0	0	0	0	0	0	0	0	0	0	0	0	0	0	0	0	0	0	0	0	0	0	0	0	0	0	0	0	0	0	0	0	0	0	0	0	0
ESV_428303	Eukaryota	Arthropoda	Insecta	Diptera	Cecidomyiidae			99.7	0	0	0	0	0	0	0	0	0	0	0	0	0	0	0	0	0	0	0	0	0	0	0	0	0	0	0	0	0	0	0	0	0	0	0	0	0	0	0	0	0
ESV_428304	Eukaryota	Arthropoda	Insecta	Diptera	Cecidomyiidae			99.4	0	0	0	0	0	0	0	0	0	0	0	0	0	0	0	0	0	0	0	0	0	0	0	0	0	0	0	0	0	0	0	0	0	0	0	0	0	0	0	0	0
ESV_428307	Eukaryota	Arthropoda	Insecta	Hymenoptera				96.5	0	0	0	0	0	0	0	0	0	0	0	0	0	0	0	0	0	0	0	0	0	0	0	0	0	0	0	0	0	0	0	0	0	0	0	0	0	0	0	0	0
ESV_428309	Eukaryota	Arthropoda	Insecta	Hemiptera	Aleyrodidae			98.7	0	0	0	0	0	0	0	0	0	0	0	0	0	0	0	0	0	0	0	0	0	0	0	0	0	0	0	0	0	0	0	0	0	0	0	0	0	0	0	0	0
ESV_428310	Eukaryota	Arthropoda	Insecta	Diptera	Psychodidae	Psychoda		100	0	0	0	0	0	0	0	0	0	0	0	0	0	0	0	0	0	0	0	0	0	0	0	0	0	0	0	0	0	0	0	0	0	0	0	0	0	0	0	0	0
ESV_428312	Eukaryota	Arthropoda	Insecta	Diptera	Cecidomyiidae			100	0	0	0	0	0	0	0	0	0	0	0	0	0	0	0	0	0	0	0	0	0	0	0	0	0	0	0	0	0	0	0	0	0	0	0	0	0	0	0	0	0
ESV_428314	Eukaryota	Arthropoda	Insecta	Diptera	Psychodidae			99	0	0	0	0	0	0	0	0	0	0	0	0	0	0	0	0	0	0	0	0	0	0	0	0	0	0	0	0	0	0	0	0	0	0	0	0	0	0	0	0	0
ESV_428315	Eukaryota	Arthropoda	Insecta	Diptera	Cecidomyiidae			94.9	0	0	0	0	0	0	0	0	0	0	0	0	0	0	0	0	0	0	0	0	0	0	0	0	0	0	0	0	0	0	0	0	0	0	0	0	0	0	0	0	0
ESV_428316	Eukaryota	Arthropoda	Insecta	Diptera	Cecidomyiidae			97.1	0	0	0	0	0	0	0	0	0	0	0	0	0	0	0	0	0	0	0	0	0	0	0	0	0	0	0	0	0	0	0	0	0	0	0	0	0	0	0	0	0
ESV_428320	Eukaryota	Arthropoda	Insecta	Diptera	Cecidomyiidae			95.5	0	0	0	0	0	0	0	0	0	0	0	0	0	0	0	0	0	0	0	0	0	0	0	0	0	0	0	0	0	0	0	0	0	0	0	0	0	0	0	0	0
ESV_428321	Eukaryota	Arthropoda	Insecta	Diptera	Cecidomyiidae			100	0	0	0	0	0	0	0	0	0	0	0	0	0	0	0	0	0	0	0	0	0	0	0	0	0	0	0	0	0	0	0	0	0	0	0	0	0	0	0	0	0
ESV_428324	Eukaryota	Arthropoda	Insecta	Diptera	Cecidomyiidae			99.7	0	0	0	0	0	0	0	0	0	0	0	0	0	0	0	0	0	0	0	0	0	0	0	0	0	0	0	0	0	0	0	0	0	0	0	0	0	0	0	0	0
ESV_428326	Eukaryota	Arthropoda	Insecta	Diptera	Cecidomyiidae			100	0	0	0	0	0	0	0	0	0	0	0	0	0	0	0	0	0	0	0	0	0	0	0	0	0	0	0	0	0	0	0	0	0	0	0	0	0	0	0	0	0
ESV_428329	Eukaryota	Arthropoda	Insecta	Diptera				100	0	0	0	0	0	0	0	0	0	0	0	0	0	0	0	0	0	0	0	0	0	0	0	0	0	1	0	0	0	0	0	0	0	0	0	0	0	0	0	0	0
ESV_428330	Eukaryota	Arthropoda	Insecta	Diptera	Cecidomyiidae			95.2	0	0	0	0	0	0	0	0	0	0	0	0	0	0	0	0	0	0	0	0	0	0	0	0	0	0	0	0	0	0	0	0	0	0	0	0	0	0	0	0	0
ESV_428336	Eukaryota	Arthropoda	Insecta	Diptera	Cecidomyiidae			95.2	0	0	0	0	0	0	0	0	0	0	0	0	0	0	0	0	0	0	0	0	0	0	0	0	0	0	0	0	0	0	0	0	0	0	0	0	0	0	0	0	0
ESV_428338	Eukaryota	Arthropoda	Insecta	Diptera	Cecidomyiidae			96.2	0	0	0	0	0	0	0	0	0	0	0	0	0	0	0	0	0	0	0	0	0	0	0	0	0	0	0	0	0	0	0	0	0	0	0	0	0	0	0	0	0
ESV_428339	Eukaryota	Arthropoda	Insecta	Hymenoptera	Platygastridae			99.7	0	0	0	0	0	0	0	0	0	0	0	0	0	0	0	0	0	0	0	0	0	0	0	0	0	0	0	0	0	0	0	0	0	0	0	0	0	1	1	2	0
ESV_428345	Eukaryota	Arthropoda	Insecta	Diptera	Cecidomyiidae			98.7	0	0	0	0	0	0	0	0	0	0	0	0	0	0	0	0	0	0	0	0	0	0	0	0	0	0	0	0	0	0	0	0	0	0	0	0	0	0	0	0	0
ESV_428355	Eukaryota	Arthropoda	Insecta	Diptera	Cecidomyiidae			98.4	0	0	0	0	0	0	0	0	0	0	0	0	0	0	0	0	0	0	0	0	0	0	0	0	0	0	0	0	0	0	0	0	0	0	0	0	0	0	0	0	0
ESV_428356	Eukaryota	Arthropoda	Insecta	Diptera	Cecidomyiidae			95.5	0	0	0	0	0	0	0	0	0	0	0	0	0	0	0	0	0	0	0	0	0	0	0	0	0	0	0	0	0	0	0	0	0	0	0	0	0	0	0	0	0
ESV_428364	Eukaryota	Arthropoda	Insecta	Diptera	Cecidomyiidae			96.5	0	0	0	0	0	0	0	0	0	0	0	0	0	0	0	0	0	0	0	0	0	0	0	0	0	0	0	0	0	0	0	0	0	0	0	0	0	0	0	0	0
ESV_428377	Eukaryota	Arthropoda	Insecta	Diptera	Cecidomyiidae			93.9	0	0	0	0	0	0	0	0	0	0	0	0	0	0	0	0	0	0	0	0	0	0	0	0	0	0	0	0	0	0	0	0	0	0	0	0	0	0	0	0	0
ESV_428379	Eukaryota	Arthropoda	Insecta	Diptera	Cecidomyiidae			94.9	0	0	0	0	0	0	0	0	0	0	0	0	0	0	0	0	0	0	0	0	0	0	0	0	0	0	0	0	0	0	0	0	0	0	0	0	0	0	0	0	0
ESV_428392	Eukaryota	Arthropoda	Insecta					94.9	0	0	0	0	0	0	0	0	0	0	0	0	0	0	0	0	0	0	0	0	0	0	0	0	0	0	0	0	0	0	0	0	0	0	0	0	0	0	0	0	0
ESV_428400	Eukaryota	Arthropoda	Insecta					85.6	0	0	0	0	0	0	0	0	0	0	0	0	8	2	3	2	0	0	0	1	4	1	0	4	0	0	0	0	0	0	0	0	0	0	0	0	0	0	0	0	0
ESV_428402	Eukaryota	Arthropoda	Insecta	Diptera	Cecidomyiidae			95.5	0	0	0	0	0	0	0	0	0	0	0	0	0	0	0	0	0	0	0	0	0	0	0	0	0	0	0	0	0	0	0	0	0	0	0	0	0	0	0	0	0
ESV_428404	Eukaryota	Arthropoda	Insecta	Diptera				96.5	0	0	0	0	0	0	0	0	0	0	0	0	0	0	0	0	0	0	0	0	0	0	0	0	0	0	0	0	0	0	0	0	0	0	0	0	0	0	0	0	0
ESV_428414	Eukaryota	Arthropoda	Insecta	Diptera	Cecidomyiidae			96.5	0	0	0	0	0	0	0	0	0	0	0	0	0	0	0	0	0	0	0	0	0	0	0	0	0	0	0	0	0	0	0	0	0	0	0	0	0	0	0	0	0
ESV_428421	Eukaryota	Arthropoda	Insecta	Coleoptera	Curculionidae	Curculio	Curculio sp. 2 ZM-2022a	85.3	0	0	0	0	0	0	0	0	0	0	0	0	0	0	0	0	0	0	0	0	0	0	0	0	0	0	0	0	0	0	0	0	0	0	0	0	95	0	0	0	0
ESV_428423	Eukaryota	Arthropoda	Insecta	Diptera	Cecidomyiidae	Prodiplosis	Prodiplosis floricola	99.7	0	0	0	0	0	0	0	0	0	0	0	0	0	0	0	0	0	0	0	0	0	0	0	0	0	0	0	0	0	0	0	0	0	0	0	0	0	0	0	0	0
ESV_428424	Eukaryota	Arthropoda	Insecta	Diptera	Cecidomyiidae			94.6	0	0	0	0	0	0	0	0	0	0	0	0	0	0	0	0	0	0	0	0	0	0	0	0	0	0	0	0	0	0	0	0	0	0	0	0	0	0	0	0	0
ESV_428434	Eukaryota	Arthropoda	Insecta	Diptera	Cecidomyiidae			94.9	0	0	0	0	0	0	0	0	0	0	0	0	0	0	0	0	0	0	0	0	0	0	0	0	80	9	4	1	1	0	2	1	3	8	2	1	0	0	0	0	0
ESV_428439	Eukaryota	Arthropoda	Insecta	Hymenoptera	Ceraphronidae			87.2	0	0	0	0	0	0	0	0	0	0	0	0	0	0	0	0	0	0	0	0	0	0	0	0	0	0	0	0	0	0	0	0	0	0	0	0	0	0	0	0	0
ESV_428440	Eukaryota	Arthropoda	Insecta	Diptera	Cecidomyiidae			96.5	0	0	0	0	0	0	0	0	0	0	0	0	0	0	0	0	0	0	0	0	0	0	0	0	0	0	0	0	0	0	0	0	0	0	0	0	0	0	0	0	0
ESV_428450	Eukaryota	Arthropoda	Insecta	Diptera	Cecidomyiidae			93.9	0	0	0	0	0	0	0	0	0	0	0	0	0	0	0	0	0	0	0	0	0	0	0	0	0	0	0	0	0	0	0	0	0	0	0	0	0	0	0	0	0
ESV_428456	Eukaryota	Arthropoda	Insecta	Diptera	Cecidomyiidae			95.5	0	0	0	0	0	0	0	0	0	0	0	0	0	0	0	0	0	0	0	0	0	0	0	0	0	0	0	0	0	0	0	0	0	0	0	0	0	0	0	0	0
ESV_428463	Eukaryota	Arthropoda	Insecta	Diptera	Cecidomyiidae			92.7	0	0	0	0	0	0	0	0	0	0	0	0	0	0	0	0	0	0	0	0	0	0	0	0	0	0	0	0	0	0	0	0	0	0	0	0	0	0	0	0	0
ESV_428464	Eukaryota	Arthropoda	Insecta	Diptera	Cecidomyiidae			94.9	0	0	0	0	0	0	0	0	0	0	0	0	0	0	0	0	0	0	0	0	0	0	0	0	0	0	0	0	0	0	0	0	0	0	0	0	0	0	0	0	0
ESV_428465	Eukaryota	Arthropoda	Insecta	Diptera	Cecidomyiidae			94.2	0	0	0	0	0	0	0	0	0	0	0	0	0	0	0	0	0	0	0	0	0	0	0	0	0	0	0	0	0	0	0	0	0	0	0	0	0	0	0	0	0
ESV_428475	Eukaryota	Arthropoda	Insecta	Diptera	Cecidomyiidae			99.4	0	0	0	0	0	0	0	0	0	0	0	0	0	0	0	0	0	0	0	0	0	0	0	0	0	0	0	0	0	0	0	0	0	0	0	0	0	0	0	0	0
ESV_428479	Eukaryota	Arthropoda	Insecta	Diptera	Cecidomyiidae			94.2	0	0	0	0	0	0	0	0	0	0	0	0	0	0	0	0	0	0	0	0	0	0	0	0	0	0	0	0	0	0	0	0	0	0	0	0	0	0	0	0	0
ESV_428490	Eukaryota	Arthropoda	Insecta	Diptera	Cecidomyiidae			99.7	0	0	0	0	0	0	0	0	0	0	0	0	0	0	0	0	0	0	0	0	0	0	0	0	0	0	0	0	0	0	0	0	0	0	0	0	0	0	0	0	0
ESV_428494	Eukaryota	Arthropoda	Insecta	Diptera	Cecidomyiidae			95.2	0	0	0	0	0	0	0	0	0	0	0	0	0	0	0	0	0	0	0	0	0	0	0	0	0	0	0	0	0	0	0	0	0	0	0	0	0	0	0	0	0
ESV_428499	Eukaryota	Arthropoda	Insecta	Diptera	Cecidomyiidae			93.6	0	0	0	0	0	0	0	0	0	0	0	0	0	0	0	0	0	0	0	0	0	0	0	0	0	0	0	0	0	0	0	0	0	0	0	0	0	0	0	0	0
ESV_428502	Eukaryota	Arthropoda	Insecta	Diptera	Cecidomyiidae			98.1	0	0	0	0	0	0	0	0	0	0	0	0	0	0	0	0	0	0	0	0	0	0	0	0	0	0	0	0	0	0	0	0	0	0	0	0	0	0	0	0	0
ESV_428503	Eukaryota	Arthropoda	Insecta	Diptera	Cecidomyiidae			95.8	0	0	0	0	0	0	0	0	0	0	0	0	0	0	0	0	0	0	0	0	0	0	0	0	0	0	0	0	0	0	0	0	0	0	0	0	0	0	0	0	0
ESV_428505	Eukaryota	Arthropoda	Insecta	Diptera	Cecidomyiidae			95.8	0	0	0	0	0	0	0	0	0	0	0	0	0	0	0	0	0	0	0	0	0	0	0	0	0	0	0	0	0	0	0	0	0	0	0	0	0	0	0	0	0
ESV_428509	Eukaryota	Arthropoda	Insecta	Diptera	Cecidomyiidae			94.9	0	0	0	0	0	0	0	0	0	0	0	0	0	0	0	0	0	0	0	0	0	0	0	0	0	0	0	0	0	0	0	0	0	0	0	0	0	0	0	0	0
ESV_428513	Eukaryota	Arthropoda	Insecta					86.6	1	0	0	0	2	0	0	1	1	89	0	1	2	0	114	0	0	1	2	2	0	1	2	2	3	2	11	2	0	0	0	1	0	1	1	4	0	0	0	0	0
ESV_428518	Eukaryota	Arthropoda	Insecta	Diptera	Cecidomyiidae			99	0	0	0	0	0	0	0	0	0	0	0	0	0	0	0	0	0	0	0	0	0	0	0	0	0	0	0	0	0	0	0	0	0	0	0	0	0	0	0	0	0
ESV_428550	Eukaryota	Arthropoda	Insecta	Diptera	Cecidomyiidae			94.9	0	0	0	0	0	0	0	0	0	0	0	0	0	0	0	0	0	0	0	0	0	0	0	0	0	0	0	0	0	0	0	0	0	0	0	0	0	0	0	0	0
ESV_428555	Eukaryota	Arthropoda	Insecta	Diptera				94.2	0	0	0	0	0	0	0	0	0	0	0	0	0	0	0	0	0	0	0	0	0	0	0	0	0	0	0	0	0	0	0	0	0	0	0	0	0	0	0	0	0
ESV_428562	Eukaryota	Arthropoda	Insecta	Diptera	Cecidomyiidae			93.6	0	0	0	0	0	0	0	0	0	0	0	0	0	0	0	0	0	0	0	0	0	0	0	0	0	0	0	0	0	0	0	0	0	0	0	0	0	0	0	0	0
ESV_428564	Eukaryota	Arthropoda	Insecta	Coleoptera				100	0	0	1	0	0	0	0	0	0	0	0	102	0	0	2	13	1	0	0	1	0	0	0	0	14	0	1	1	0	0	0	0	0	0	0	0	2	0	1	0	0
ESV_428582	Eukaryota	Arthropoda	Insecta	Diptera	Cecidomyiidae			93.3	0	0	0	0	0	0	0	0	0	0	0	0	0	0	0	0	0	0	0	0	0	0	0	0	0	0	0	0	0	0	0	0	0	0	0	0	0	0	0	0	0
ESV_428609	Eukaryota	Chordata	Aves	Cuculiformes	Cuculidae	Crotophaga	Crotophaga major	99	0	0	0	0	0	0	0	0	2	0	0	0	0	0	0	0	0	0	0	0	0	0	0	33	0	0	0	0	0	0	0	0	0	0	0	0	0	3	2	0	0
ESV_428782	Eukaryota	Arthropoda	Insecta	Diptera				97.1	1	0	1	123	0	0	0	0	0	0	0	1	0	2	0	1	6	0	1	3	1	62	1	0	0	0	0	1	0	0	4	0	0	0	0	0	0	0	0	0	0
ESV_428838	Eukaryota	Arthropoda	Insecta	Lepidoptera				86.9	0	0	0	0	0	0	0	0	0	0	0	0	0	0	0	0	0	0	0	0	0	0	0	0	0	0	0	0	0	0	0	0	0	0	0	0	0	0	0	0	0
ESV_428852	Eukaryota	Arthropoda	Insecta	Diptera	Cecidomyiidae			97.4	0	0	0	0	0	0	0	0	0	0	0	0	0	0	0	0	0	0	0	0	0	0	0	0	0	0	0	0	0	0	0	0	0	0	0	0	0	0	0	0	0
ESV_428854	Eukaryota	Arthropoda	Insecta	Lepidoptera				87.2	0	0	0	0	0	0	0	0	0	0	0	0	0	0	0	0	0	0	0	0	0	0	0	0	0	0	0	0	0	0	0	0	0	0	0	0	0	0	0	0	0
ESV_428855	Eukaryota	Arthropoda	Insecta	Diptera	Cecidomyiidae			98.1	0	0	0	0	0	0	0	0	0	0	0	0	0	0	0	0	0	0	0	0	0	0	0	0	0	0	0	0	0	0	0	0	0	0	0	0	0	0	0	0	0
ESV_428856	Eukaryota	Arthropoda	Insecta	Diptera	Cecidomyiidae			98.1	0	0	0	0	0	0	0	0	0	0	0	0	0	0	0	0	0	0	0	0	0	0	0	0	0	0	0	0	0	0	0	0	0	0	0	0	0	0	0	0	0
ESV_428857	Eukaryota	Arthropoda	Insecta	Diptera	Cecidomyiidae			90.7	0	0	0	0	0	0	0	0	0	0	0	0	0	0	0	0	0	0	0	0	0	0	0	0	0	0	0	0	0	0	0	0	0	0	0	0	0	0	0	0	0
ESV_428858	Eukaryota	Arthropoda	Insecta	Diptera	Cecidomyiidae			94.9	0	0	0	0	0	0	0	0	0	0	0	0	0	0	0	0	0	0	0	0	0	0	0	0	0	0	0	0	0	0	0	0	0	0	0	0	0	0	0	0	0
ESV_428859	Eukaryota	Arthropoda	Insecta	Diptera	Cecidomyiidae			94.6	0	0	0	0	0	0	0	0	0	0	0	0	0	0	0	0	0	0	0	0	0	0	0	0	0	0	0	0	0	0	0	0	0	0	0	0	0	0	0	0	0
ESV_428861	Eukaryota	Arthropoda	Insecta	Diptera	Cecidomyiidae			93.6	0	0	0	0	0	0	0	0	0	0	0	0	0	0	0	0	0	0	0	0	0	0	0	0	0	0	0	0	0	0	0	0	0	0	0	0	0	0	0	0	0
ESV_428864	Eukaryota	Arthropoda	Insecta	Diptera	Cecidomyiidae			100	0	0	0	0	0	0	0	0	0	0	0	0	0	0	0	0	0	0	0	0	0	0	0	0	0	0	0	0	0	0	0	0	0	0	0	0	0	0	0	0	0
ESV_428866	Eukaryota	Arthropoda	Insecta	Diptera	Cecidomyiidae			92.3	0	0	0	0	0	0	0	0	0	0	0	0	0	0	0	0	0	0	0	0	0	0	0	0	0	0	0	0	0	0	0	0	0	0	0	0	0	0	0	0	0
ESV_428867	Eukaryota	Arthropoda	Insecta	Diptera	Cecidomyiidae			95.2	0	0	0	0	0	0	0	0	0	0	0	0	0	0	0	0	0	0	0	0	0	0	0	0	0	0	0	0	0	0	0	0	0	0	0	0	0	0	0	0	0
ESV_428869	Eukaryota	Arthropoda	Insecta					95.8	0	0	0	0	0	0	0	0	0	0	0	0	0	0	0	0	0	0	0	0	0	0	0	0	0	0	0	0	0	0	0	0	1	0	1	0	0	0	0	0	0
ESV_428870	Eukaryota	Arthropoda	Insecta	Diptera	Cecidomyiidae			93.9	0	0	0	0	0	0	0	0	0	0	0	0	0	0	0	0	0	0	0	0	0	0	0	0	0	0	0	0	0	0	0	0	0	0	0	0	0	0	0	0	0
ESV_428871	Eukaryota	Arthropoda	Insecta	Diptera	Cecidomyiidae			99.4	0	0	0	0	0	0	0	0	0	0	0	0	1	1	57	1	1	0	1	0	2	3	2	2	0	0	0	0	0	0	0	0	0	0	0	0	0	0	0	0	0
ESV_428872	Eukaryota	Arthropoda	Insecta	Diptera	Cecidomyiidae			93.3	0	0	0	0	0	0	0	0	0	0	0	0	0	0	0	0	0	0	0	0	0	0	0	0	0	0	0	0	0	0	0	0	0	0	0	0	0	0	0	0	0
ESV_428876	Eukaryota	Arthropoda	Insecta	Diptera	Cecidomyiidae			93.9	0	0	0	0	0	0	0	0	0	0	0	0	0	0	0	0	0	0	0	0	0	0	0	0	0	0	0	0	0	0	0	0	0	0	0	0	0	0	0	0	0
ESV_428877	Eukaryota	Arthropoda	Insecta	Diptera	Cecidomyiidae			94.6	0	0	0	0	0	0	0	0	0	0	0	0	0	0	0	0	0	0	0	0	0	0	0	0	0	0	0	0	0	0	0	0	0	0	0	0	0	0	0	0	0
ESV_428879	Eukaryota	Arthropoda	Insecta	Diptera	Cecidomyiidae			96.8	0	0	0	0	0	0	0	0	0	0	0	0	0	0	0	0	0	0	0	0	0	0	0	0	0	0	0	0	0	0	0	0	0	0	0	0	0	0	0	0	0
ESV_428882	Eukaryota	Arthropoda	Insecta	Diptera	Cecidomyiidae			99.7	0	0	0	0	0	0	0	0	0	0	0	0	0	0	0	0	0	0	0	0	0	0	0	0	0	0	0	0	0	0	0	0	0	0	0	0	0	0	0	0	0
ESV_428886	Eukaryota	Arthropoda	Insecta	Diptera	Cecidomyiidae			94.6	0	0	0	0	0	0	0	0	0	0	0	0	0	0	0	0	0	0	0	0	0	0	0	0	0	0	0	0	0	0	0	0	0	0	0	0	0	0	0	0	0
ESV_428887	Eukaryota	Arthropoda	Insecta	Diptera	Cecidomyiidae			93.6	0	0	0	0	0	0	0	0	0	0	0	0	0	0	0	0	0	0	0	0	0	0	0	0	0	0	0	0	0	0	0	0	0	0	0	0	0	0	0	0	0
ESV_428888	Eukaryota	Arthropoda	Insecta	Diptera	Cecidomyiidae			98.7	0	0	0	0	0	0	0	0	0	0	0	0	0	0	0	0	0	0	0	0	0	0	0	0	0	0	0	0	0	0	0	0	0	0	0	0	0	0	0	0	0
ESV_428889	Eukaryota	Arthropoda	Insecta	Diptera	Cecidomyiidae			98.7	0	0	0	0	0	0	0	0	0	0	0	0	0	0	0	0	0	0	0	0	0	0	0	0	0	0	0	0	0	0	0	0	0	0	0	0	0	0	0	0	0
ESV_428893	Eukaryota	Arthropoda	Insecta	Diptera	Cecidomyiidae			95.2	0	0	0	0	0	0	0	0	0	0	0	0	0	0	0	0	0	0	0	0	0	0	0	0	0	0	0	0	0	0	0	0	0	0	0	0	0	0	0	0	0
ESV_428897	Eukaryota	Arthropoda	Insecta	Diptera	Cecidomyiidae			94.2	0	0	0	0	0	0	0	0	0	0	0	0	0	0	0	0	0	0	0	0	0	0	0	0	0	0	0	0	0	0	0	0	0	0	0	0	0	0	0	0	0
ESV_428912	Eukaryota	Arthropoda	Insecta	Diptera	Cecidomyiidae			93	0	0	0	0	0	0	0	0	0	0	0	0	0	0	0	0	0	0	0	0	0	0	0	0	0	0	0	0	0	0	0	0	0	0	0	0	0	0	0	0	0
ESV_428944	Eukaryota	Arthropoda	Insecta	Diptera	Cecidomyiidae			93.3	0	0	0	0	0	0	0	0	0	0	0	0	0	0	0	0	0	0	0	0	0	0	0	0	0	0	0	0	0	0	0	0	0	0	0	0	0	0	0	0	0
ESV_428955	Eukaryota	Arthropoda	Insecta					85.6	280	23	22	18	42	31	39	26	36	39	35	43	0	0	0	0	0	0	0	0	0	0	0	0	0	0	0	0	0	0	0	0	0	0	0	0	0	0	1	0	0
ESV_428956	Eukaryota	Arthropoda	Insecta	Diptera	Cecidomyiidae			93.9	0	0	0	0	0	0	0	0	0	0	0	0	0	0	0	0	0	0	0	0	0	0	0	0	0	0	0	0	0	0	0	0	0	0	0	0	0	0	0	0	0
ESV_428967	Eukaryota	Arthropoda	Insecta	Diptera	Cecidomyiidae			98.4	0	0	0	0	0	0	0	0	0	0	0	0	0	0	0	0	0	0	0	0	0	0	0	0	0	0	0	0	0	0	0	0	0	0	0	0	0	0	0	0	0
ESV_428969	Eukaryota	Arthropoda	Insecta	Diptera	Cecidomyiidae			97.1	0	0	0	0	0	0	0	0	0	0	0	0	0	0	0	0	0	0	0	0	0	0	0	0	0	0	0	0	0	0	0	0	0	0	0	0	0	0	0	0	0
ESV_428972	Eukaryota	Arthropoda	Insecta	Diptera	Cecidomyiidae			95.2	0	0	0	0	0	0	0	0	0	0	0	0	0	0	0	0	0	0	0	0	0	0	0	0	0	0	0	0	0	0	0	0	0	0	0	0	0	0	0	0	0
ESV_428977	Eukaryota	Arthropoda	Insecta	Diptera	Cecidomyiidae			95.2	0	0	0	0	0	0	0	0	0	0	0	0	0	0	0	0	0	0	0	0	0	0	0	0	0	0	0	0	0	0	0	0	0	0	0	0	0	0	0	0	0
ESV_428994	Eukaryota	Arthropoda	Insecta	Diptera	Cecidomyiidae			95.8	0	0	0	0	0	0	0	0	0	0	0	0	0	0	0	0	0	0	0	0	1	0	0	0	0	0	0	0	1	0	0	0	0	0	0	0	0	0	0	0	0
ESV_428996	Eukaryota	Arthropoda	Insecta	Diptera	Cecidomyiidae			94.9	0	0	0	0	0	0	0	0	0	0	0	0	0	0	0	0	0	0	0	0	0	0	0	0	0	0	0	0	0	0	0	0	0	0	0	0	0	0	0	0	0
ESV_429011	Eukaryota	Arthropoda	Insecta	Diptera	Cecidomyiidae			99.4	0	0	0	0	0	0	0	0	0	0	0	0	0	0	0	0	0	0	0	0	0	0	0	0	0	0	0	0	0	0	0	0	0	0	0	0	0	0	0	0	0
ESV_429012	Eukaryota	Arthropoda	Insecta	Diptera	Cecidomyiidae			96.8	0	0	0	0	0	0	0	0	0	0	0	0	0	0	0	0	0	0	0	0	0	0	0	0	0	0	0	0	0	0	0	0	0	0	0	0	0	0	0	0	0
ESV_429015	Eukaryota	Arthropoda	Insecta	Diptera	Cecidomyiidae			99	0	0	0	0	0	0	0	0	0	0	0	0	0	0	0	0	0	0	0	0	0	0	0	0	0	0	0	0	0	0	0	0	0	0	0	0	0	0	0	0	0
ESV_429016	Eukaryota	Arthropoda	Insecta					95.8	0	0	0	0	0	0	0	0	0	0	0	0	0	0	0	0	0	0	0	0	0	0	0	0	0	0	0	0	0	0	0	0	0	0	0	0	0	0	0	0	0
ESV_429019	Eukaryota	Arthropoda	Insecta	Diptera	Cecidomyiidae			96.5	0	0	0	0	0	0	0	0	0	0	0	0	0	0	0	0	0	0	0	0	0	0	0	0	0	0	0	0	0	0	0	0	0	0	0	0	0	0	0	0	0
ESV_429021	Eukaryota	Arthropoda	Insecta	Diptera				91.4	0	0	0	0	0	0	0	0	0	0	0	0	0	0	0	0	0	0	0	0	0	0	0	0	0	0	0	0	0	0	0	0	0	0	0	0	0	0	0	0	0
ESV_429027	Eukaryota	Arthropoda	Insecta	Diptera	Cecidomyiidae			97.4	0	0	0	0	0	0	0	0	0	0	0	0	0	0	0	0	0	0	0	0	0	0	0	0	0	0	0	0	0	0	0	0	0	0	0	0	0	0	0	0	0
ESV_429029	Eukaryota	Arthropoda	Insecta	Diptera				95.5	0	0	0	0	0	0	0	0	0	0	0	0	0	0	0	0	0	0	0	0	0	0	0	0	0	0	0	0	0	0	0	0	0	0	0	0	0	0	0	0	0
ESV_429031	Eukaryota	Arthropoda	Insecta	Diptera	Cecidomyiidae			94.6	0	0	0	0	0	0	0	0	0	0	0	0	0	0	0	0	0	0	0	0	0	0	0	0	0	0	0	0	0	0	0	0	0	0	0	0	0	0	0	0	0
ESV_429032	Eukaryota	Arthropoda	Insecta	Diptera	Cecidomyiidae			95.2	0	0	0	0	0	0	0	0	0	0	0	0	0	0	0	0	0	0	0	0	0	0	0	0	0	0	0	0	0	0	0	0	0	0	0	0	0	0	0	0	0
ESV_429033	Eukaryota	Arthropoda	Insecta	Diptera	Cecidomyiidae			99.4	0	0	0	0	0	0	0	0	0	0	0	0	0	0	0	0	0	0	0	0	0	0	0	0	0	0	0	0	0	0	0	0	0	0	0	0	0	2	0	0	0
ESV_429034	Eukaryota	Arthropoda	Insecta	Diptera	Cecidomyiidae			94.5	0	0	0	0	0	0	0	0	0	0	0	0	0	0	0	0	0	0	0	0	0	0	0	0	0	3	0	5	0	6	1	0	2	1	4	1	0	0	0	0	0
ESV_429039	Eukaryota	Arthropoda	Insecta	Diptera	Cecidomyiidae			97.8	0	0	0	0	0	0	0	0	0	0	0	0	0	0	0	0	0	0	0	0	0	0	0	0	0	0	0	0	0	0	0	0	0	0	0	0	0	0	0	0	0
ESV_429042	Eukaryota	Arthropoda	Insecta	Diptera	Cecidomyiidae			93.3	0	0	0	0	0	0	0	0	0	0	0	0	0	0	0	0	0	0	0	0	0	0	0	0	0	0	0	0	0	0	0	0	0	0	0	0	0	0	0	0	0
ESV_429044	Eukaryota	Arthropoda	Insecta	Diptera	Cecidomyiidae			100	0	0	0	0	0	0	0	0	0	0	0	0	0	0	0	0	0	0	0	0	0	0	0	0	0	0	0	0	0	0	0	0	0	0	0	0	0	0	0	0	0
ESV_429059	Eukaryota	Arthropoda	Insecta	Diptera	Cecidomyiidae			99	0	0	0	0	0	0	0	0	0	0	0	0	0	0	0	0	0	0	0	0	0	0	0	0	0	0	0	0	0	0	0	0	0	0	0	0	0	0	0	0	0
ESV_429060	Eukaryota	Arthropoda	Insecta	Diptera	Cecidomyiidae			93.3	0	0	0	0	0	0	0	0	0	0	0	0	0	0	0	0	0	0	0	0	0	0	0	0	0	0	0	0	0	0	0	0	0	0	0	0	0	0	0	0	0
ESV_429070	Eukaryota	Arthropoda	Insecta	Diptera	Cecidomyiidae			95.5	0	0	0	0	0	0	0	0	0	0	0	0	0	0	0	0	0	0	0	0	0	0	0	0	0	0	0	0	0	0	0	0	0	0	0	0	0	0	0	0	0
ESV_429071	Eukaryota	Arthropoda	Insecta	Diptera	Cecidomyiidae			99.4	0	0	0	0	0	0	0	0	0	0	0	0	0	0	0	0	0	0	0	0	0	0	0	0	0	0	0	0	0	0	0	0	0	0	0	0	0	0	0	0	0
ESV_429076	Eukaryota	Arthropoda	Insecta	Diptera	Cecidomyiidae			99.4	0	0	0	0	0	0	0	0	0	0	0	0	102	7	14	15	8	149	7	15	11	18	17	13	0	0	0	0	0	0	0	0	0	0	0	0	0	0	0	0	0
ESV_429084	Eukaryota	Arthropoda	Insecta	Diptera	Cecidomyiidae			94.9	0	0	0	0	0	0	0	0	0	0	0	0	0	0	0	0	0	0	0	0	0	0	0	0	0	0	0	0	0	0	0	0	0	0	0	0	0	0	0	0	0
ESV_429086	Eukaryota	Arthropoda	Insecta	Diptera	Cecidomyiidae			99.4	0	0	0	0	0	0	0	0	0	0	0	0	0	0	0	0	0	0	0	0	0	0	0	0	0	0	0	0	0	0	0	0	0	0	0	0	0	0	0	0	0
ESV_429087	Eukaryota	Arthropoda	Insecta	Diptera	Cecidomyiidae			92.7	0	0	0	0	0	0	0	0	0	0	0	0	0	0	0	0	0	0	0	0	0	0	0	0	0	0	0	0	0	0	0	0	0	0	0	0	0	0	0	0	0
ESV_429093	Eukaryota	Arthropoda	Insecta	Diptera	Cecidomyiidae			100	0	0	0	0	0	0	0	0	0	0	0	0	0	0	0	0	0	0	0	0	0	0	0	0	0	0	0	0	0	0	0	0	0	0	0	0	0	0	0	0	0
ESV_429099	Eukaryota	Arthropoda	Insecta	Diptera				94.2	0	0	0	0	0	0	0	0	0	0	0	0	0	0	0	0	0	0	0	0	0	0	0	0	0	0	0	0	0	0	0	0	0	0	0	0	0	0	0	0	0
ESV_429102	Eukaryota	Arthropoda	Insecta	Diptera	Cecidomyiidae			85	0	0	0	0	0	0	0	0	0	0	0	0	0	0	0	0	0	0	0	0	0	0	0	0	0	0	0	0	0	0	0	0	0	0	0	0	0	0	0	0	0
ESV_429108	Eukaryota	Arthropoda	Insecta	Diptera	Cecidomyiidae			94.6	0	0	0	0	0	0	0	0	0	0	0	0	0	0	0	0	0	0	0	0	0	0	0	0	0	0	0	0	0	0	0	0	0	0	0	0	0	0	0	0	0
ESV_429115	Eukaryota	Arthropoda	Insecta	Hemiptera	Aleyrodidae			99.7	0	0	0	0	0	0	0	0	0	0	0	0	0	0	0	0	0	0	0	0	0	0	0	0	0	0	0	0	0	0	0	0	0	0	0	0	0	0	0	0	0
ESV_429117	Eukaryota	Arthropoda	Arachnida	Sarcoptiformes				90.4	0	0	0	0	0	0	0	0	0	0	0	0	0	0	0	0	0	0	0	0	0	0	0	0	0	0	0	0	0	0	0	0	0	0	0	0	0	0	0	0	0
ESV_429129	Eukaryota	Arthropoda	Insecta	Diptera	Cecidomyiidae			99.7	0	0	0	0	0	0	0	0	0	0	0	0	0	0	0	0	0	0	0	0	0	0	0	0	0	0	0	0	0	0	0	0	0	0	0	0	0	0	0	0	0
ESV_429132	Eukaryota	Arthropoda	Insecta	Diptera	Cecidomyiidae			99.4	0	0	0	0	0	0	0	0	0	0	0	0	0	0	0	0	0	0	0	0	0	0	0	0	155	0	0	5	0	0	0	2	3	15	1	4	0	0	0	0	0
ESV_429156	Eukaryota	Arthropoda	Insecta	Diptera	Cecidomyiidae			95.2	0	0	0	0	0	0	0	0	0	0	0	0	0	0	0	0	0	0	0	0	0	0	0	0	0	0	0	0	0	0	0	0	0	0	0	0	0	0	0	0	0
ESV_429158	Eukaryota	Arthropoda	Insecta	Diptera	Cecidomyiidae			98.7	0	0	0	0	0	0	0	0	0	0	0	0	0	0	0	0	0	0	0	0	0	0	0	0	0	0	0	0	0	0	0	0	0	0	0	0	0	0	0	0	0
ESV_429159	Eukaryota	Arthropoda	Insecta	Diptera	Cecidomyiidae			99.4	0	0	0	0	0	0	0	0	0	0	0	0	0	0	0	0	0	0	0	0	0	0	0	0	0	0	0	0	0	0	0	0	0	0	0	0	0	0	0	0	0
ESV_429160	Eukaryota	Arthropoda	Insecta	Diptera	Cecidomyiidae			93.9	0	0	0	0	0	0	0	0	0	0	0	0	0	0	0	0	0	0	0	0	0	0	0	0	0	0	0	0	0	0	0	0	0	0	0	0	0	0	0	0	0
ESV_429182	Eukaryota	Arthropoda	Insecta	Diptera	Cecidomyiidae			93.6	0	0	0	0	0	0	0	0	0	0	0	0	0	0	0	0	0	0	0	0	0	0	0	0	0	0	0	0	0	0	0	0	0	0	0	0	0	0	0	0	0
ESV_429191	Eukaryota	Arthropoda	Insecta	Diptera	Cecidomyiidae			97.4	0	0	0	0	0	0	0	0	0	0	0	0	0	0	0	0	0	0	0	0	0	0	0	0	0	0	0	0	0	0	0	0	0	0	0	0	0	0	0	0	0
ESV_429198	Eukaryota	Arthropoda	Insecta	Diptera	Cecidomyiidae			94.9	0	0	0	0	0	0	0	0	0	0	0	0	0	0	0	0	0	0	0	0	0	0	0	0	0	0	0	0	0	0	0	0	0	0	0	0	0	0	0	0	0
ESV_429203	Eukaryota	Arthropoda	Insecta	Diptera				97.8	0	0	0	0	0	0	0	0	0	0	0	0	0	0	0	0	0	0	0	0	0	0	0	0	0	0	0	0	0	0	0	0	0	0	0	0	0	0	0	0	0
ESV_429207	Eukaryota	Arthropoda	Insecta	Diptera	Cecidomyiidae			99	0	0	0	0	0	0	0	0	0	0	0	0	0	0	0	0	0	0	0	0	0	0	0	0	0	0	0	0	0	0	0	0	0	0	0	0	0	0	0	0	0
ESV_429208	Eukaryota	Arthropoda	Insecta	Diptera				93.9	0	0	0	0	0	0	0	0	0	0	2	0	0	0	0	0	0	0	0	0	0	0	0	0	0	0	0	0	0	0	0	0	0	0	0	0	0	0	0	0	0
ESV_429211	Eukaryota	Arthropoda	Insecta					94.2	0	0	0	0	0	0	0	0	0	0	0	0	0	0	0	0	0	0	0	0	0	0	0	0	0	0	0	0	0	0	0	0	0	0	0	0	0	0	0	0	0
ESV_429212	Eukaryota	Arthropoda	Insecta	Diptera	Cecidomyiidae			96.5	0	0	0	0	0	0	0	0	0	0	0	0	0	0	0	0	0	0	0	0	0	0	0	0	0	0	0	0	0	0	0	0	0	0	0	0	0	0	0	0	0
ESV_429216	Eukaryota	Arthropoda	Insecta	Diptera	Cecidomyiidae			99.4	0	0	0	0	0	0	0	0	0	0	0	0	0	0	0	0	0	0	0	0	0	0	0	0	0	0	0	0	0	0	0	0	0	0	0	0	0	0	0	0	0
ESV_429217	Eukaryota	Arthropoda	Insecta	Diptera	Cecidomyiidae			99.4	0	0	0	0	0	0	0	0	0	0	0	0	0	0	0	0	0	0	0	0	0	0	0	0	0	0	0	0	0	0	0	0	0	0	0	0	0	0	0	0	0
ESV_429220	Eukaryota	Arthropoda	Insecta	Diptera	Cecidomyiidae			99.4	0	0	0	0	0	0	0	0	0	0	0	0	0	0	0	0	0	0	0	0	0	0	0	0	0	0	0	0	0	0	0	0	0	0	0	0	0	0	0	0	0
ESV_429221	Eukaryota	Arthropoda	Insecta	Psocodea	Epipsocidae			99.7	0	0	0	0	0	0	0	0	0	0	0	0	0	0	0	0	0	0	0	0	0	0	0	0	0	0	0	0	0	0	0	0	0	0	0	0	0	0	0	0	0
ESV_429223	Eukaryota	Arthropoda	Insecta	Diptera	Cecidomyiidae			94.2	0	0	0	0	0	0	0	0	0	0	0	0	0	0	0	0	0	0	0	0	0	0	0	0	0	0	0	0	0	0	0	0	0	0	0	0	0	0	0	0	0
ESV_429229	Eukaryota	Arthropoda	Insecta					95.5	0	0	0	0	0	0	0	0	0	0	0	0	0	0	0	0	0	0	0	0	0	0	0	0	0	0	0	0	0	0	0	0	0	0	0	0	0	0	0	0	0
ESV_429234	Eukaryota	Arthropoda	Insecta	Diptera	Cecidomyiidae			96.8	0	0	0	0	0	0	0	0	0	0	0	0	0	0	0	0	0	0	0	0	0	0	0	0	0	0	0	0	0	0	0	0	0	0	0	0	0	0	0	0	0
ESV_429239	Eukaryota	Arthropoda	Insecta	Lepidoptera	Gracillariidae	Phyllonorycter	Phyllonorycter issikii	96.8	0	0	0	0	0	0	0	0	0	0	0	0	0	0	0	0	0	0	0	0	0	0	0	0	0	0	0	0	0	0	0	0	0	0	0	0	0	0	0	0	0
ESV_429240	Eukaryota	Arthropoda	Insecta	Diptera	Cecidomyiidae			99.7	0	0	0	0	0	0	0	0	0	0	0	0	0	0	0	0	0	0	0	0	0	0	0	0	0	0	0	0	0	0	0	0	0	0	0	0	0	0	0	0	0
ESV_429245	Eukaryota	Arthropoda	Collembola	Entomobryomorpha				99.7	0	0	0	0	0	0	0	0	0	0	0	0	0	0	0	0	0	0	0	0	0	0	0	0	1	0	0	0	0	0	0	0	0	0	0	0	0	0	0	0	0
ESV_429247	Eukaryota	Arthropoda	Insecta	Diptera	Cecidomyiidae			94.2	0	0	0	0	0	0	0	0	0	0	0	0	0	0	0	0	0	0	0	0	0	0	0	0	0	0	0	0	0	0	0	0	0	0	0	0	0	0	0	0	0
ESV_429248	Eukaryota	Arthropoda	Insecta					96.5	0	0	0	0	0	0	0	0	0	0	0	0	0	0	0	0	0	0	0	0	0	0	0	0	0	0	0	0	0	0	0	0	0	0	0	0	0	0	0	0	0
ESV_429257	Eukaryota	Arthropoda	Insecta	Diptera	Cecidomyiidae			99.7	0	0	0	0	0	0	0	0	0	0	0	0	0	0	0	0	0	0	0	0	0	0	0	0	0	0	0	0	0	0	0	0	0	0	0	0	0	0	0	0	0
ESV_429259	Eukaryota	Arthropoda	Insecta	Diptera	Cecidomyiidae	Sitodiplosis		99	0	0	0	0	0	0	0	0	0	0	0	0	0	0	0	0	0	0	0	0	0	0	0	0	0	0	0	0	0	0	0	0	0	0	0	0	0	0	0	0	0
ESV_429267	Eukaryota	Arthropoda	Insecta	Diptera	Cecidomyiidae			99	0	0	0	0	0	0	0	0	0	0	0	0	0	0	0	0	0	0	0	0	0	0	0	0	0	0	0	0	0	0	0	0	0	0	0	0	0	0	0	0	0
ESV_429282	Eukaryota	Arthropoda	Insecta	Diptera	Cecidomyiidae			93.6	0	0	0	0	0	0	0	0	0	0	0	0	0	0	0	0	0	0	0	0	0	0	0	0	0	0	0	0	0	0	0	0	0	0	0	0	0	0	0	0	0
ESV_429320	Eukaryota	Arthropoda	Insecta	Diptera	Cecidomyiidae			94.6	0	0	0	0	0	0	0	0	0	0	0	0	0	0	0	0	0	0	0	0	0	0	0	0	0	0	0	0	0	0	0	0	0	0	0	0	0	0	0	0	0
ESV_429325	Eukaryota	Arthropoda	Insecta	Diptera	Cecidomyiidae			95.2	0	0	0	0	0	0	0	0	0	0	0	0	0	0	0	0	0	0	0	0	0	0	0	0	0	0	0	0	0	0	0	0	0	0	0	0	0	0	0	0	0
ESV_429351	Eukaryota	Arthropoda	Insecta	Diptera	Cecidomyiidae			95.9	0	0	0	0	0	0	0	0	0	0	0	0	0	0	0	0	0	0	0	0	0	0	0	0	0	0	0	0	0	0	0	0	0	0	0	0	0	0	0	0	0
ESV_429363	Eukaryota	Arthropoda	Insecta	Diptera	Cecidomyiidae			94.2	0	0	0	0	0	0	0	0	0	0	0	0	0	0	0	0	0	0	0	0	0	0	0	0	0	0	0	0	0	0	0	0	0	0	0	0	0	0	0	0	0
ESV_429366	Eukaryota	Arthropoda	Arachnida	Trombidiformes	Tydeidae			87.5	0	0	0	0	0	0	0	0	0	0	0	0	0	0	0	0	0	0	0	0	0	0	0	0	0	0	0	0	0	0	0	0	0	0	0	0	0	0	0	0	0
ESV_429372	Eukaryota	Arthropoda	Insecta					90.4	0	0	0	0	0	0	0	0	0	0	0	0	0	0	0	0	0	0	0	0	0	0	0	0	0	0	0	0	0	0	0	0	0	0	0	0	0	0	0	0	0
ESV_429373	Eukaryota	Arthropoda	Insecta					89.8	0	0	0	0	0	0	0	0	0	0	0	0	0	0	0	0	0	0	0	0	0	0	0	0	0	0	0	0	0	0	0	0	0	0	0	0	0	0	0	0	0
ESV_429375	Eukaryota	Arthropoda	Insecta	Diptera	Cecidomyiidae			98.7	0	0	0	0	0	0	0	0	0	0	0	0	0	0	0	0	0	0	0	0	0	0	0	0	0	0	0	0	0	0	0	0	0	0	0	0	0	0	0	0	0
ESV_429376	Eukaryota	Arthropoda	Insecta	Diptera	Cecidomyiidae			100	0	0	0	0	0	0	0	0	0	0	0	0	0	0	0	0	0	0	0	0	0	0	0	0	0	0	0	0	0	0	0	0	0	0	0	0	0	0	0	0	0
ESV_429379	Eukaryota	Arthropoda	Insecta	Diptera	Cecidomyiidae			99	0	0	0	0	0	0	0	0	0	0	0	0	0	0	0	0	0	0	0	0	0	0	0	0	0	0	0	0	0	0	0	0	0	0	0	0	0	0	0	0	0
ESV_429382	Eukaryota	Arthropoda	Insecta	Diptera	Cecidomyiidae			97.8	0	0	0	0	0	0	0	0	0	0	0	0	0	0	0	0	0	0	0	0	0	0	0	0	0	0	0	0	0	0	0	0	0	0	0	0	0	0	0	0	0
ESV_429385	Eukaryota	Arthropoda	Insecta	Diptera	Cecidomyiidae			96.2	0	0	0	0	0	0	0	0	0	0	0	0	0	0	0	0	0	0	0	0	0	0	0	0	0	0	0	0	0	0	0	0	0	0	0	0	0	0	0	0	0
ESV_429389	Eukaryota	Arthropoda	Insecta	Diptera	Cecidomyiidae			98.7	0	0	0	0	0	0	0	0	0	0	0	0	0	0	0	0	0	0	0	0	0	0	0	0	0	0	0	0	0	0	0	0	0	0	0	0	0	0	0	0	0
ESV_429390	Eukaryota	Arthropoda	Insecta	Diptera	Cecidomyiidae			99.7	0	0	0	0	0	0	0	0	0	0	0	0	0	0	0	0	0	0	0	0	0	0	0	0	0	0	0	0	0	0	0	0	0	0	0	0	0	0	0	0	0
ESV_429394	Eukaryota	Arthropoda	Insecta	Diptera	Cecidomyiidae			97.8	0	0	0	0	0	0	0	0	0	0	0	0	0	0	0	0	0	0	0	0	0	0	0	0	0	0	0	0	0	0	0	0	0	0	0	0	0	0	0	0	0
ESV_429395	Eukaryota	Arthropoda	Insecta	Diptera	Cecidomyiidae			98.4	0	0	0	0	0	0	0	0	0	0	0	0	0	0	0	0	0	0	0	0	0	0	0	0	0	0	0	0	0	0	0	0	0	0	0	0	0	0	0	0	0
ESV_429405	Eukaryota	Arthropoda	Insecta	Diptera	Cecidomyiidae			94.2	0	0	0	0	0	0	0	0	0	0	0	0	0	0	0	0	0	0	0	0	0	0	0	0	0	0	0	0	0	0	0	0	0	0	0	0	0	0	0	0	0
ESV_429432	Eukaryota	Arthropoda	Insecta	Diptera	Cecidomyiidae			94.2	0	0	0	0	0	0	0	0	0	0	0	0	0	0	0	0	0	0	0	0	0	0	0	0	0	0	0	0	0	0	0	0	0	0	0	0	0	0	0	0	0
ESV_429438	Eukaryota	Arthropoda	Insecta	Diptera	Cecidomyiidae			95.5	0	0	0	0	0	0	0	0	0	0	0	0	0	0	0	0	0	0	0	0	0	0	0	0	0	0	0	0	0	0	0	0	0	0	0	0	0	0	0	0	0
ESV_429450	Eukaryota	Arthropoda	Insecta	Diptera	Cecidomyiidae			93.6	0	0	0	0	0	0	0	0	0	0	0	0	0	0	0	0	0	0	0	0	0	0	0	0	0	0	0	0	0	0	0	0	0	0	0	0	0	0	0	0	0
ESV_429459	Eukaryota	Arthropoda	Insecta	Coleoptera				98.7	0	0	0	0	0	0	0	0	0	0	0	0	0	0	0	0	0	0	0	0	0	0	0	0	0	0	0	0	0	0	0	0	0	0	0	0	0	0	0	0	0
ESV_429470	Eukaryota	Arthropoda	Insecta	Lepidoptera	Pyralidae	Cactoblastis	Cactoblastis doddi	95.2	0	0	0	0	0	0	0	0	0	0	0	0	0	0	0	0	0	0	0	0	0	0	0	0	0	0	0	0	0	0	0	0	0	0	0	0	0	0	0	0	0
ESV_429478	Eukaryota	Arthropoda	Insecta	Diptera	Cecidomyiidae			92	0	0	0	0	0	0	0	0	0	0	0	0	0	0	0	0	0	0	0	0	0	0	0	0	0	0	0	0	0	0	0	0	0	0	0	0	0	0	0	0	0
ESV_429479	Eukaryota	Arthropoda	Insecta	Diptera	Cecidomyiidae			95.5	0	0	0	0	0	0	0	0	0	0	0	0	0	0	0	0	0	0	0	0	0	0	0	0	0	0	0	0	0	0	0	0	0	0	0	0	0	0	0	0	0
ESV_429482	Eukaryota	Arthropoda	Insecta	Diptera	Cecidomyiidae			95.2	0	0	0	0	0	0	0	0	0	0	0	0	0	0	0	0	0	0	0	0	0	0	0	0	0	0	0	0	0	0	0	0	0	0	0	0	0	0	0	0	0
ESV_429483	Eukaryota	Arthropoda	Insecta	Hymenoptera				97.7	0	0	0	0	0	0	0	0	0	0	0	0	0	0	0	0	0	0	0	0	0	0	0	0	0	0	0	0	0	0	0	0	0	0	0	0	0	0	0	0	0
ESV_429486	Eukaryota	Arthropoda	Insecta	Diptera	Cecidomyiidae			99.7	0	0	0	0	0	0	0	0	0	0	0	0	0	0	0	0	0	0	0	0	0	0	0	0	0	0	0	0	0	0	0	0	0	0	0	0	0	0	0	0	0
ESV_429487	Eukaryota	Arthropoda	Insecta	Diptera	Cecidomyiidae			99	0	0	0	0	0	0	0	0	0	0	0	0	0	0	0	0	0	0	0	0	0	0	0	0	0	0	0	0	0	0	0	0	0	0	0	0	0	0	0	0	0
ESV_429488	Eukaryota	Arthropoda	Insecta	Diptera	Cecidomyiidae			98.7	0	0	0	0	0	0	0	0	0	0	0	0	0	0	0	0	0	0	0	0	0	0	0	0	0	0	0	0	0	0	0	0	0	0	0	0	0	0	0	0	0
ESV_429492	Eukaryota	Arthropoda	Insecta	Diptera	Cecidomyiidae			95.8	0	0	0	0	0	0	0	0	0	0	0	0	0	0	0	0	0	0	0	0	0	0	0	0	0	0	0	0	0	0	0	0	0	0	0	0	0	0	0	0	0
ESV_429496	Eukaryota	Arthropoda	Insecta	Diptera	Cecidomyiidae			97.1	0	0	0	0	0	0	0	0	0	0	0	0	0	0	0	0	0	0	0	0	0	0	0	0	0	0	0	0	0	0	0	0	0	0	0	0	0	0	0	0	0
ESV_429497	Eukaryota	Arthropoda	Insecta	Diptera	Cecidomyiidae			96.5	0	0	0	0	0	0	0	0	0	0	0	0	0	0	0	0	0	0	0	0	0	0	0	0	0	0	0	0	0	0	0	0	0	0	0	0	0	0	0	0	0
ESV_429498	Eukaryota	Arthropoda	Insecta	Diptera	Chironomidae			99.4	0	0	0	0	0	0	0	0	0	0	0	0	0	0	0	0	0	0	0	0	0	0	0	0	0	0	0	0	0	0	0	0	0	0	0	0	0	0	0	0	0
ESV_429501	Eukaryota	Arthropoda	Insecta	Diptera	Cecidomyiidae			97.4	0	0	0	0	0	0	0	0	0	0	0	0	0	0	0	0	0	0	0	0	0	0	0	0	0	0	0	0	0	0	0	0	0	0	0	0	0	0	0	0	0
ESV_429504	Eukaryota	Arthropoda	Insecta	Diptera				94.2	0	0	0	0	0	0	0	0	0	0	0	0	0	0	0	0	0	0	0	0	0	0	0	0	0	0	0	0	0	0	0	0	0	0	0	0	0	0	0	0	0
ESV_429506	Eukaryota	Arthropoda	Insecta	Diptera	Cecidomyiidae			99.4	0	0	0	0	0	0	0	0	0	0	0	0	0	0	0	0	0	0	0	0	0	0	0	0	0	0	0	0	0	0	0	0	0	0	0	0	0	0	0	0	0
ESV_429508	Eukaryota	Arthropoda	Insecta	Hemiptera	Aleyrodidae			93.3	0	0	0	0	0	0	0	0	0	0	0	0	0	0	0	0	0	0	0	0	0	0	0	0	0	0	0	0	0	0	0	0	0	0	0	0	0	0	0	0	0
ESV_429514	Eukaryota	Arthropoda	Insecta	Diptera	Cecidomyiidae			100	0	0	0	0	0	0	0	0	0	0	0	0	0	0	0	0	0	0	0	0	0	0	0	0	0	0	0	0	0	0	0	0	0	0	0	0	0	0	0	0	0
ESV_429517	Eukaryota	Arthropoda	Insecta	Diptera	Cecidomyiidae			96.8	0	0	0	0	0	0	0	0	0	0	0	0	0	0	0	0	0	0	0	0	0	0	0	0	0	0	0	0	0	0	0	0	0	0	0	0	0	0	0	0	0
ESV_429520	Eukaryota	Arthropoda	Insecta	Diptera	Cecidomyiidae			97.1	0	0	0	0	0	0	0	0	0	0	0	0	0	0	0	0	0	0	0	0	0	0	0	0	0	0	0	0	0	0	0	0	0	0	0	0	0	0	0	0	0
ESV_429525	Eukaryota	Arthropoda	Insecta	Diptera	Cecidomyiidae			97.4	0	0	0	0	0	0	0	0	0	0	0	0	0	0	0	0	0	0	0	0	0	0	0	0	0	0	0	0	0	0	0	0	0	0	0	0	0	0	0	0	0
ESV_429527	Eukaryota	Arthropoda	Insecta					95.5	0	0	0	0	0	0	0	0	0	0	0	0	0	0	0	0	0	0	0	0	0	0	0	0	0	0	0	0	0	0	0	0	0	0	0	0	0	0	0	0	0
ESV_429544	Eukaryota	Arthropoda	Insecta	Diptera	Cecidomyiidae			97.1	0	0	0	0	0	0	0	0	0	0	0	0	0	0	0	0	0	0	0	0	0	0	0	0	0	0	0	0	0	0	0	0	0	0	0	0	0	0	0	0	0
ESV_429547	Eukaryota	Arthropoda	Insecta	Diptera	Cecidomyiidae			100	0	0	0	0	0	0	0	0	0	0	0	0	0	0	0	0	0	0	0	0	0	0	0	0	0	0	0	0	0	0	0	0	0	0	0	0	0	0	0	0	0
ESV_429569	Eukaryota	Arthropoda	Insecta	Diptera	Cecidomyiidae	Asteromyia		92.3	0	0	0	0	0	0	0	0	0	0	0	0	0	0	0	0	0	0	0	0	0	0	0	0	0	0	0	0	0	0	0	0	0	0	0	0	0	0	0	0	0
ESV_429583	Eukaryota	Arthropoda	Insecta	Diptera	Cecidomyiidae			98.7	0	0	0	0	0	0	0	0	0	0	0	0	0	0	0	0	0	0	0	0	0	0	0	0	0	0	0	0	0	0	0	0	0	0	0	0	0	0	0	0	0
ESV_429588	Eukaryota	Arthropoda	Insecta	Diptera	Cecidomyiidae			97.8	0	0	0	0	0	0	0	0	0	0	0	0	0	0	0	0	0	0	0	0	0	0	0	0	0	0	0	0	0	0	0	0	0	0	0	0	0	0	0	0	0
ESV_429590	Eukaryota	Arthropoda	Insecta	Hymenoptera				87.5	0	0	0	0	0	0	0	0	0	0	0	0	0	0	0	0	0	0	0	0	0	0	0	0	0	0	0	0	0	0	0	0	0	0	0	0	0	0	0	0	0
ESV_429591	Eukaryota	Arthropoda	Insecta	Diptera	Cecidomyiidae			98.4	0	0	0	0	0	0	0	0	0	0	0	0	0	0	0	0	0	0	0	0	0	0	0	0	0	0	0	0	0	0	0	0	0	0	0	0	0	0	0	0	0
ESV_429593	Eukaryota	Arthropoda	Insecta	Diptera	Cecidomyiidae			98.7	0	0	0	0	0	0	0	0	0	0	0	0	0	0	0	0	0	0	0	0	0	0	0	0	0	0	0	0	0	0	0	0	0	0	0	0	0	0	0	0	0
ESV_429594	Eukaryota	Arthropoda	Insecta	Diptera	Cecidomyiidae			100	0	0	0	0	0	0	0	0	0	0	0	0	0	0	0	0	0	0	0	0	0	0	0	0	0	0	0	0	0	0	0	0	0	0	0	0	0	0	0	0	0
ESV_429596	Eukaryota	Arthropoda	Insecta	Diptera	Cecidomyiidae			99.7	0	0	0	0	0	0	0	0	0	0	0	0	0	0	0	0	0	0	0	0	0	0	0	0	0	0	0	0	0	0	0	0	0	0	0	0	0	0	0	0	0
ESV_429601	Eukaryota	Arthropoda	Insecta	Diptera	Cecidomyiidae			92.3	0	0	0	0	0	0	0	0	0	0	0	0	0	0	0	0	0	0	0	0	0	0	0	0	0	0	0	0	0	0	0	0	0	0	0	0	0	0	0	0	0
ESV_429603	Eukaryota	Arthropoda	Insecta	Diptera	Cecidomyiidae			92.7	0	0	0	0	0	0	0	0	0	0	0	0	0	0	0	0	0	0	0	0	0	0	0	0	0	0	0	0	0	0	0	0	0	0	0	0	0	0	0	0	0
ESV_429611	Eukaryota	Arthropoda	Insecta	Diptera	Cecidomyiidae			99.7	0	0	0	0	0	0	0	0	0	0	0	0	0	0	0	0	0	0	0	0	0	0	0	0	0	0	0	0	0	0	0	0	0	0	0	0	0	0	0	0	0
ESV_429626	Eukaryota	Arthropoda	Insecta	Diptera	Cecidomyiidae			95.2	0	0	0	0	0	0	0	0	0	0	0	0	0	0	0	0	0	0	0	0	0	0	0	0	0	0	1	0	0	1	0	1	0	0	0	1	0	0	0	0	0
ESV_429637	Eukaryota	Arthropoda	Insecta	Diptera	Cecidomyiidae			96.2	0	0	0	0	0	0	0	0	0	0	0	0	0	0	0	0	0	0	0	0	0	0	0	0	2	0	0	0	0	0	0	0	0	0	0	0	0	0	0	0	0
ESV_429644	Eukaryota	Arthropoda	Insecta	Diptera	Cecidomyiidae			96.2	0	0	0	0	0	0	0	0	0	0	0	0	0	0	0	0	0	0	0	0	0	0	0	0	0	0	0	0	0	0	0	0	0	0	0	0	0	0	0	0	0
ESV_429647	Eukaryota	Arthropoda	Insecta	Diptera	Cecidomyiidae			97.8	0	0	0	0	0	0	0	0	0	0	0	0	2	3	5	1	1	0	2	0	3	5	2	1	3	1	3	10	4	1	0	3	5	7	5	3	0	0	0	0	0
ESV_429662	Eukaryota	Arthropoda	Insecta	Diptera	Cecidomyiidae			96.5	0	0	0	0	0	0	0	0	0	0	0	0	0	0	0	0	0	0	0	0	0	0	0	0	1	1	3	0	1	0	0	0	1	2	0	1	0	0	0	0	0
ESV_429666	Eukaryota	Arthropoda	Insecta					90.4	0	0	0	0	0	0	0	0	0	0	0	0	0	0	0	0	0	0	0	0	0	0	0	0	0	0	0	0	0	0	0	0	0	0	0	0	0	0	0	0	0
ESV_429670	Eukaryota	Arthropoda	Insecta	Diptera	Cecidomyiidae			98.1	0	0	0	0	0	0	0	0	0	0	0	0	0	0	0	0	0	0	0	0	0	0	0	0	0	0	0	0	0	0	0	0	0	0	0	0	0	0	0	0	0
ESV_429671	Eukaryota	Arthropoda	Insecta	Diptera	Cecidomyiidae			96.2	0	0	0	0	0	0	0	0	0	0	0	0	0	0	0	0	0	0	0	0	0	0	0	0	0	0	0	0	0	0	0	0	0	0	0	0	0	0	0	0	0
ESV_429672	Eukaryota	Arthropoda	Insecta	Diptera	Cecidomyiidae			99.4	0	0	0	0	0	0	0	0	0	0	0	0	0	0	0	0	0	0	0	0	0	0	0	0	0	0	0	0	0	0	0	0	0	0	0	0	0	0	0	0	0
ESV_429682	Eukaryota	Arthropoda	Insecta	Diptera	Cecidomyiidae			95.5	0	0	0	0	0	0	0	0	0	0	0	0	0	0	0	0	0	0	0	0	0	0	0	0	0	0	0	0	0	0	0	0	0	0	0	0	0	0	0	0	0
ESV_429684	Eukaryota	Arthropoda	Insecta	Diptera	Cecidomyiidae			94.6	0	0	0	0	0	0	0	0	0	0	0	0	0	0	0	0	0	0	0	0	0	0	0	0	0	0	0	0	0	0	0	0	0	0	0	0	0	0	0	0	0
ESV_429687	Eukaryota	Arthropoda	Insecta	Diptera	Cecidomyiidae			95.2	0	0	0	0	0	0	0	0	0	0	0	0	0	0	0	0	0	0	0	0	0	0	0	0	0	0	0	0	0	0	0	0	0	0	0	0	0	0	0	0	0
ESV_429689	Eukaryota	Arthropoda	Insecta	Diptera	Cecidomyiidae			94.6	0	0	0	0	0	0	0	0	0	0	0	0	0	0	0	0	0	0	0	0	0	0	0	0	0	0	0	0	0	0	0	0	0	0	0	0	0	0	0	0	0
ESV_429699	Eukaryota	Arthropoda	Insecta	Diptera	Cecidomyiidae			94.9	0	0	0	0	0	0	0	0	0	0	0	0	0	0	0	0	0	0	0	0	0	0	0	0	0	0	0	0	0	0	0	0	0	0	0	0	0	0	0	0	0
ESV_429706	Eukaryota	Arthropoda	Insecta	Diptera	Cecidomyiidae			99.7	0	0	0	0	0	0	0	0	0	0	0	0	0	0	0	0	0	0	0	0	0	0	0	0	0	0	0	0	0	0	0	0	0	0	0	0	0	0	0	0	0
ESV_429711	Eukaryota	Arthropoda	Insecta					97.8	0	0	0	0	0	0	0	0	0	0	0	0	0	0	0	0	0	0	0	0	0	0	0	0	0	0	0	0	0	0	0	0	0	0	0	0	0	0	0	0	0
ESV_429714	Eukaryota	Arthropoda	Insecta	Diptera	Cecidomyiidae			96.8	0	0	0	0	0	0	0	0	0	0	0	0	0	0	0	0	0	0	0	0	0	0	0	0	0	0	0	0	0	0	0	0	0	0	0	0	0	0	0	0	0
ESV_429718	Eukaryota	Arthropoda	Insecta	Diptera	Cecidomyiidae			93.3	0	0	0	0	0	0	0	0	0	0	0	0	0	0	0	0	0	0	0	0	0	0	0	0	1	3	0	5	0	0	1	0	0	1	9	0	0	0	0	0	0
ESV_429726	Eukaryota	Arthropoda	Insecta	Diptera	Cecidomyiidae			96.2	0	0	0	0	0	0	0	0	0	0	0	0	0	0	0	0	0	0	0	0	0	0	0	0	0	0	0	0	0	0	0	0	0	0	0	0	0	0	0	0	0
ESV_429753	Eukaryota	Arthropoda	Insecta	Diptera	Cecidomyiidae			97.8	0	0	0	0	0	0	0	0	0	0	0	0	0	0	0	0	0	0	0	0	0	0	0	0	0	0	0	0	0	0	0	0	0	0	0	0	0	0	0	0	0
ESV_429760	Eukaryota	Arthropoda	Insecta	Diptera	Cecidomyiidae			99.4	0	0	0	0	0	0	0	0	0	0	0	0	0	0	0	0	0	0	0	0	0	0	0	0	0	0	0	0	0	0	0	0	0	0	0	0	0	0	0	0	0
ESV_429762	Eukaryota	Arthropoda	Insecta	Diptera	Cecidomyiidae			99.4	0	0	0	0	0	0	0	0	0	0	0	0	0	0	0	0	0	0	0	0	0	0	0	0	0	0	0	0	0	0	0	0	0	0	0	0	0	0	0	0	0
ESV_429765	Eukaryota	Arthropoda	Insecta	Diptera	Cecidomyiidae			94.6	0	0	0	0	0	0	0	0	0	0	0	0	0	0	0	0	0	0	0	0	0	0	0	0	0	0	0	0	0	0	0	0	0	0	0	0	0	0	0	0	0
ESV_429773	Eukaryota	Arthropoda	Insecta	Psocodea				93	0	0	0	0	0	0	0	0	0	0	0	0	0	0	0	0	0	0	0	0	0	0	0	0	0	0	0	0	0	0	0	0	0	0	0	0	0	0	0	0	0
ESV_429776	Eukaryota	Arthropoda	Insecta					88.2	479	1	0	0	2	0	0	1	2	2	2	1	2	1	1	4	3	1	0	2	7	5	1	5	0	0	0	1	0	1	0	0	5	0	0	1	0	1	0	0	0
ESV_429779	Eukaryota	Arthropoda	Insecta	Diptera	Cecidomyiidae			99.7	0	0	0	0	0	0	0	0	0	0	0	0	0	0	0	0	0	0	0	0	0	0	0	0	0	0	0	0	0	0	0	0	0	0	0	0	0	0	0	0	0
ESV_429783	Eukaryota	Arthropoda	Insecta	Diptera	Cecidomyiidae			99.7	0	0	0	0	0	0	0	0	0	0	0	0	0	0	0	0	0	0	0	0	0	0	0	0	0	0	0	0	0	0	0	0	0	0	0	0	0	0	0	0	0
ESV_429801	Eukaryota	Arthropoda	Insecta	Diptera	Cecidomyiidae			99.4	0	0	0	0	0	0	0	0	0	0	0	0	0	0	0	0	0	0	0	0	0	0	0	0	0	0	0	0	0	0	0	0	0	0	0	0	0	0	0	0	0
ESV_429807	Eukaryota	Arthropoda	Insecta	Diptera	Cecidomyiidae			99	0	0	0	0	0	0	0	0	0	0	0	0	0	0	0	0	0	0	0	0	0	0	0	0	0	0	0	0	0	0	0	0	0	0	0	0	0	0	0	0	0
ESV_429812	Eukaryota	Arthropoda	Insecta	Diptera	Cecidomyiidae			95.5	0	0	0	0	0	0	0	0	0	0	0	0	0	0	0	0	0	0	0	0	0	0	0	0	0	0	0	0	0	0	0	0	0	0	0	0	0	0	0	0	0
ESV_429814	Eukaryota	Arthropoda	Insecta	Diptera	Cecidomyiidae			100	0	0	0	0	0	0	0	0	0	0	0	0	0	0	0	0	0	0	0	0	0	0	0	0	0	0	0	0	0	0	0	0	0	0	0	0	0	0	0	0	0
ESV_429838	Eukaryota	Arthropoda	Insecta	Diptera	Cecidomyiidae			92	0	0	0	0	0	0	0	0	0	0	0	0	0	0	0	0	0	0	0	0	0	0	0	0	0	0	0	0	0	0	0	0	0	0	0	0	0	0	0	0	0
ESV_429841	Eukaryota	Arthropoda	Insecta	Diptera	Cecidomyiidae			93.9	0	0	0	0	0	0	0	0	0	0	0	0	0	0	0	0	0	0	0	0	0	0	0	0	0	0	0	0	0	0	0	0	0	0	0	0	0	0	0	0	0
ESV_429855	Eukaryota	Arthropoda	Insecta	Diptera	Cecidomyiidae			92.6	0	0	0	0	0	0	0	0	0	0	0	0	0	0	0	0	0	0	0	0	0	0	0	0	0	0	0	0	0	0	0	0	0	0	0	0	0	0	0	0	0
ESV_429856	Eukaryota	Arthropoda	Insecta					94.9	0	0	0	0	0	0	0	0	0	0	0	0	0	0	0	0	0	0	0	0	0	0	0	0	0	0	0	0	0	0	0	0	0	0	0	0	0	0	0	0	0
ESV_429857	Eukaryota	Arthropoda	Insecta	Diptera	Cecidomyiidae			95.2	0	0	0	0	0	0	0	0	0	0	0	0	0	0	0	0	0	0	0	0	0	0	0	0	0	0	0	0	0	0	0	0	0	0	0	0	0	0	0	0	0
ESV_429859	Eukaryota	Arthropoda	Insecta	Diptera	Cecidomyiidae			93.2	0	0	0	0	0	0	0	0	0	0	0	0	0	0	0	0	0	0	0	0	0	0	0	0	0	0	0	0	0	0	0	0	0	0	0	0	0	0	0	0	0
ESV_429861	Eukaryota	Arthropoda	Insecta	Diptera	Cecidomyiidae			93.9	0	0	0	0	0	0	0	0	0	0	0	0	0	0	0	0	0	0	0	0	0	0	0	0	0	0	0	0	0	0	0	0	0	0	0	0	0	0	0	0	0
ESV_429862	Eukaryota	Arthropoda	Insecta	Diptera	Cecidomyiidae			97.1	0	0	0	0	0	0	0	0	0	0	0	0	0	0	0	0	0	0	0	0	0	0	0	0	0	0	0	0	0	0	0	0	0	0	0	0	0	0	0	0	0
ESV_429863	Eukaryota	Arthropoda	Insecta	Hymenoptera	Braconidae			85.3	0	0	0	0	0	0	0	0	0	0	0	0	0	0	0	0	0	0	0	0	0	0	0	0	0	0	0	0	0	0	0	0	0	0	0	0	0	0	0	0	0
ESV_429868	Eukaryota	Arthropoda	Insecta	Diptera	Cecidomyiidae			97.4	0	0	0	0	0	0	0	0	0	0	0	0	0	0	0	0	0	0	0	0	0	0	0	0	0	0	0	0	0	0	0	0	0	0	0	0	0	0	0	0	0
ESV_429870	Eukaryota	Arthropoda	Insecta	Lepidoptera	Pyralidae	Eumysia	Eumysia pallidipennella	85.9	0	0	0	0	0	0	0	0	0	0	0	0	0	0	0	0	0	0	0	0	0	0	0	0	0	0	0	0	0	0	0	0	0	0	0	0	0	0	0	0	0
ESV_429871	Eukaryota	Arthropoda	Insecta					96.5	0	0	0	0	0	0	0	0	0	0	0	0	0	0	0	0	0	0	0	0	0	0	0	0	0	0	0	0	0	0	0	0	0	0	0	0	0	0	0	0	0
ESV_429872	Eukaryota	Arthropoda	Insecta	Diptera	Cecidomyiidae			95.2	0	0	0	0	0	0	0	0	0	0	0	0	0	0	0	0	0	0	0	0	0	0	0	0	0	0	0	0	0	0	0	0	0	0	0	0	0	0	0	0	0
ESV_429873	Eukaryota	Arthropoda	Insecta	Diptera	Cecidomyiidae			93.6	0	0	0	0	0	0	0	0	0	0	0	0	0	0	0	0	0	0	0	0	0	0	0	0	0	0	0	0	0	0	0	0	0	0	0	0	0	0	0	0	0
ESV_429877	Eukaryota	Arthropoda	Insecta	Diptera	Cecidomyiidae			100	0	0	0	0	0	0	0	0	0	0	0	0	0	0	0	0	0	0	0	0	0	0	0	0	0	0	0	0	0	0	0	0	0	0	0	0	0	0	0	0	0
ESV_429879	Eukaryota	Arthropoda	Insecta	Diptera	Cecidomyiidae			94.9	0	0	0	0	0	0	0	0	0	0	0	0	0	0	0	0	0	0	0	0	0	0	0	0	0	0	0	0	0	0	0	0	0	0	0	0	0	0	0	0	0
ESV_429883	Eukaryota	Arthropoda	Insecta	Lepidoptera	Gelechiidae	Aristotelia		96.5	0	0	0	0	0	0	0	0	0	0	0	0	0	0	0	0	0	0	0	0	0	0	0	0	0	0	0	0	0	0	0	0	0	0	0	0	0	0	0	0	0
ESV_429891	Eukaryota	Arthropoda	Insecta	Hemiptera	Aleyrodidae			93.3	0	0	0	0	0	0	0	0	0	0	0	0	0	0	0	0	0	0	0	0	0	0	0	0	0	0	0	0	0	0	0	0	0	0	0	0	0	0	0	0	0
ESV_429899	Eukaryota	Arthropoda	Insecta	Coleoptera	Cerambycidae			87.5	0	0	0	0	0	0	0	0	0	0	0	0	0	0	0	0	0	0	0	0	0	0	0	0	0	0	0	0	0	0	0	0	0	0	0	0	0	0	0	0	0
ESV_429901	Eukaryota	Arthropoda	Insecta	Odonata	Aeshnidae	Agyrtacantha	Agyrtacantha tumidula	85	0	0	0	0	0	0	0	0	0	0	0	0	0	0	0	0	0	0	0	0	0	0	0	0	0	0	0	0	0	0	0	0	0	0	0	0	0	0	0	0	0
ESV_429921	Eukaryota	Arthropoda	Insecta	Diptera	Cecidomyiidae			95.2	0	0	0	0	0	0	0	0	0	0	0	0	0	0	0	0	0	0	0	0	0	0	0	0	0	0	0	0	0	0	0	0	0	0	0	0	0	0	0	0	0
ESV_429949	Eukaryota	Chordata	Mammalia	Primates	Atelidae	Alouatta	Alouatta palliata	100	0	0	0	0	0	0	0	0	0	0	0	0	0	0	0	0	0	0	0	0	0	0	0	0	0	0	0	0	0	0	0	0	0	0	0	0	0	0	0	0	0
ESV_429957	Eukaryota	Arthropoda	Insecta	Diptera	Cecidomyiidae			99	0	0	0	0	0	0	0	0	0	0	0	0	0	0	0	0	0	0	0	0	0	0	0	0	0	0	0	0	0	0	0	0	0	0	0	0	0	0	0	0	0
ESV_429962	Eukaryota	Chordata	Aves	Accipitriformes	Cathartidae	Coragyps	Coragyps atratus	100	0	0	94	1	3	1	0	1	4	0	0	0	0	0	0	5	0	0	0	0	0	0	0	0	0	0	0	0	0	1	0	0	0	0	0	0	0	1	0	0	0
ESV_430016	Eukaryota	Arthropoda	Insecta	Lepidoptera	Geometridae	Maxates	Maxates imitans	88.5	0	0	0	0	0	0	0	0	0	0	0	0	0	0	0	0	0	0	0	0	0	0	0	0	0	0	0	0	0	0	0	0	0	0	0	0	0	0	0	0	0
ESV_430030	Eukaryota	Arthropoda	Collembola	Entomobryomorpha	Paronellidae	Salina	Salina maculiflora	99.4	0	0	0	0	0	0	0	0	0	0	0	0	0	0	0	0	0	0	0	0	0	0	0	0	0	0	0	0	0	0	0	0	0	0	0	0	0	0	0	0	0
ESV_430032	Eukaryota	Arthropoda	Insecta	Diptera	Cecidomyiidae			99.7	0	0	0	0	0	0	0	0	0	0	0	0	0	0	0	0	0	0	0	0	0	0	0	0	0	0	0	0	0	0	0	0	0	0	0	0	0	0	0	0	0
ESV_430034	Eukaryota	Arthropoda	Insecta	Diptera	Cecidomyiidae			99.4	0	0	0	0	0	0	0	0	0	0	0	0	0	0	0	0	0	0	0	0	0	0	0	0	0	0	0	0	0	0	0	0	0	0	0	0	0	0	0	0	0
ESV_430035	Eukaryota	Arthropoda	Insecta					93	0	0	0	0	3	0	0	0	0	0	0	0	0	0	0	0	0	0	0	0	0	0	0	0	0	0	0	0	0	0	0	0	0	0	0	0	0	0	0	0	0
ESV_430036	Eukaryota	Arthropoda	Insecta	Diptera	Cecidomyiidae			95.2	0	0	0	0	0	0	0	0	0	0	0	0	0	0	0	0	0	0	0	0	0	0	0	0	0	0	0	0	0	0	0	0	0	0	0	0	0	0	0	0	0
ESV_430037	Eukaryota	Arthropoda	Insecta	Diptera	Cecidomyiidae			100	0	0	0	0	0	0	0	0	0	0	0	0	0	0	0	0	0	0	0	0	0	0	0	0	0	0	0	0	0	0	0	0	0	0	0	0	0	0	0	0	0
ESV_430038	Eukaryota	Arthropoda	Insecta	Diptera	Cecidomyiidae			97.8	0	0	0	0	0	0	0	0	0	0	0	0	0	0	0	0	0	0	0	0	0	0	0	0	0	0	0	0	0	0	0	0	0	0	0	0	0	0	0	0	0
ESV_430040	Eukaryota	Arthropoda	Insecta	Strepsiptera	Myrmecolacidae			96.1	0	0	0	0	0	0	0	0	0	0	0	0	0	0	0	0	0	0	0	0	0	0	0	0	0	0	0	0	0	0	0	0	0	0	0	0	0	0	0	0	0
ESV_430042	Eukaryota	Arthropoda	Insecta	Diptera	Cecidomyiidae			93.3	0	0	0	0	0	0	0	0	0	0	0	0	0	0	0	0	0	0	0	0	0	0	0	0	0	0	0	0	0	0	0	0	0	0	0	0	0	0	0	0	0
ESV_430049	Eukaryota	Arthropoda	Insecta	Diptera	Cecidomyiidae			95.5	0	0	0	0	0	0	0	0	0	0	0	0	0	0	0	0	0	0	0	0	0	0	0	0	0	0	0	0	0	0	0	0	0	0	0	0	0	0	0	0	0
ESV_430062	Eukaryota	Arthropoda	Insecta	Lepidoptera	Gracillariidae	Phyllocnistis	Phyllocnistis vitegenella	93.9	0	0	0	0	0	0	0	0	0	0	0	0	0	0	0	0	0	0	0	0	0	0	0	0	0	0	0	0	0	0	0	0	0	0	0	0	0	0	0	0	0
ESV_430065	Eukaryota	Arthropoda	Insecta	Diptera	Cecidomyiidae			93.9	0	0	0	0	0	0	0	0	0	0	0	0	0	0	0	0	0	0	0	0	0	0	0	0	0	0	0	0	0	0	0	0	0	0	0	0	0	0	0	0	0
ESV_430072	Eukaryota	Arthropoda	Insecta					85.2	0	0	0	0	0	0	0	0	0	0	0	0	0	0	0	0	0	0	0	0	0	0	0	0	0	0	0	0	0	0	0	0	0	0	0	0	0	0	0	0	0
ESV_430075	Eukaryota	Arthropoda	Insecta	Orthoptera	Trigonidiidae			99	0	0	0	0	0	0	0	0	0	0	0	0	0	0	0	0	0	0	0	0	0	0	0	0	0	0	0	0	0	0	0	0	0	0	0	0	0	0	0	0	0
ESV_430076	Eukaryota	Arthropoda	Insecta	Diptera	Cecidomyiidae			97.1	0	0	0	0	0	0	0	0	0	0	0	0	3	2	8	2	15	1	1	1	2	6	4	2	0	0	0	0	0	0	0	0	0	0	0	0	0	0	0	0	0
ESV_430085	Eukaryota	Arthropoda	Insecta	Diptera	Cecidomyiidae			96.8	0	0	0	0	0	0	0	0	0	0	0	0	0	0	0	0	0	0	0	0	0	0	0	0	0	0	0	0	0	0	0	0	0	0	0	0	0	0	0	0	0
ESV_430088	Eukaryota	Arthropoda	Insecta	Diptera	Cecidomyiidae			100	0	0	0	0	0	0	0	0	0	0	0	0	0	0	0	0	0	0	0	0	0	0	0	0	0	0	0	0	0	0	0	0	0	0	0	0	0	0	0	0	0
ESV_430107	Eukaryota	Arthropoda	Arachnida	Araneae	Lycosidae	Alopecosa	Alopecosa pulverulenta	94.9	0	0	0	0	0	0	0	0	0	0	0	0	0	0	0	0	0	0	0	0	0	0	0	0	0	0	0	0	0	0	0	0	0	0	0	0	0	0	0	0	0
ESV_430114	Eukaryota	Arthropoda	Insecta	Diptera	Cecidomyiidae			95.8	0	0	0	0	0	0	0	0	0	0	0	0	0	1	0	0	0	1	4	0	3	0	1	0	0	0	0	0	0	0	0	0	0	0	0	0	0	0	0	0	0
ESV_430116	Eukaryota	Arthropoda	Insecta	Diptera	Cecidomyiidae			98.7	0	0	0	0	0	0	0	0	0	0	0	0	1	0	1	0	0	0	0	0	0	1	1	1	0	0	0	0	0	0	0	0	0	0	1	0	0	0	0	0	1
ESV_430119	Eukaryota	Arthropoda	Insecta	Diptera	Cecidomyiidae			99.7	0	0	0	0	0	0	0	0	0	0	0	0	0	0	0	0	0	0	0	0	0	0	0	0	0	0	0	0	0	0	0	0	0	0	0	0	0	0	0	0	0
ESV_430133	Eukaryota	Arthropoda	Insecta	Diptera	Cecidomyiidae			99	0	0	0	0	0	0	0	0	0	0	0	0	0	0	0	0	0	0	0	0	0	0	0	0	0	0	0	0	0	0	0	0	0	0	0	0	0	0	0	0	0
ESV_430134	Eukaryota	Arthropoda	Insecta	Diptera	Cecidomyiidae			97.1	0	0	0	0	0	0	0	0	0	0	0	0	0	0	0	0	0	0	0	0	0	0	0	0	0	0	0	0	0	0	0	0	0	0	0	0	0	0	0	0	0
ESV_430135	Eukaryota	Arthropoda	Collembola	Entomobryomorpha				99.7	0	0	0	0	0	0	0	0	0	0	0	0	0	0	0	0	0	0	0	0	0	0	0	0	0	0	0	0	0	0	0	0	0	0	0	0	0	0	0	0	0
ESV_430142	Eukaryota	Arthropoda	Insecta	Diptera	Cecidomyiidae			96.2	0	0	0	0	0	0	0	0	0	0	0	0	0	0	0	0	0	0	0	0	0	0	0	0	0	0	0	0	0	0	0	0	0	0	0	0	0	0	0	0	0
ESV_430145	Eukaryota	Arthropoda	Insecta	Lepidoptera	Pyralidae	Acrobasis	Acrobasis suavella	94.2	0	0	0	0	0	0	0	0	0	0	0	0	0	0	0	0	0	0	0	0	0	0	0	0	0	0	0	0	0	0	0	0	0	0	0	0	0	0	0	0	0
ESV_430155	Eukaryota	Arthropoda	Insecta	Diptera	Cecidomyiidae			94.9	0	0	0	0	0	0	0	0	0	0	0	0	0	0	0	0	0	0	0	0	0	0	0	0	0	0	0	0	0	0	0	0	0	0	0	0	0	0	0	0	0
ESV_430187	Eukaryota	Arthropoda	Insecta	Diptera	Cecidomyiidae			93	0	0	0	0	0	0	0	0	0	0	0	0	0	0	0	0	0	0	0	0	0	0	0	0	0	0	0	0	0	0	0	0	0	0	0	0	0	0	0	0	0
ESV_430194	Eukaryota	Arthropoda	Insecta	Hymenoptera	Scelionidae			99.7	0	0	0	0	0	0	0	0	0	0	0	0	0	0	0	0	0	0	0	0	0	0	0	0	0	0	0	0	0	0	0	0	0	0	0	0	0	0	0	0	0
ESV_430197	Eukaryota	Arthropoda	Insecta	Diptera	Cecidomyiidae			94.6	0	0	0	0	0	0	0	0	0	0	0	0	0	0	0	0	0	0	0	0	0	0	0	0	0	0	0	0	0	0	0	0	0	0	0	0	0	0	0	0	0
ESV_430199	Eukaryota	Arthropoda	Insecta	Hymenoptera	Ceraphronidae			99	0	0	0	0	0	0	0	0	0	0	0	0	0	0	0	0	0	0	0	0	0	0	0	0	0	0	0	0	0	0	0	0	0	0	0	0	0	0	0	0	0
ESV_430201	Eukaryota	Arthropoda	Insecta	Diptera	Cecidomyiidae			94.6	0	0	0	0	0	0	0	0	0	0	0	0	0	0	0	0	0	0	0	0	0	0	0	0	0	0	0	0	0	0	0	0	0	0	0	0	0	0	0	0	0
ESV_430204	Eukaryota	Arthropoda	Insecta	Diptera	Cecidomyiidae			99.4	0	0	0	0	0	0	0	0	0	0	0	0	0	0	0	0	0	0	0	0	0	0	0	0	0	0	0	0	0	0	0	0	0	0	0	0	0	0	0	0	0
ESV_430206	Eukaryota	Arthropoda	Insecta	Diptera	Cecidomyiidae			99.7	0	0	0	0	0	0	0	0	0	0	0	0	0	0	0	0	0	0	0	0	0	0	0	0	0	0	0	0	0	0	0	0	0	0	0	0	0	0	0	0	0
ESV_430211	Eukaryota	Arthropoda	Insecta	Diptera	Cecidomyiidae			98.1	0	0	0	0	0	0	0	0	0	0	0	0	0	0	0	0	0	0	0	0	0	0	0	0	0	0	0	0	0	0	0	0	0	0	0	0	0	0	0	0	0
ESV_430213	Eukaryota	Arthropoda	Insecta					87.2	0	0	0	0	0	0	0	0	0	0	0	0	0	0	0	0	0	0	0	0	0	0	0	0	0	0	0	0	0	0	0	0	0	0	0	0	0	0	0	0	0
ESV_430215	Eukaryota	Arthropoda	Insecta	Psocodea				99.4	0	0	0	0	0	0	0	0	0	0	0	0	0	0	0	0	0	0	0	0	0	0	0	0	0	0	0	0	0	0	0	0	0	0	0	0	0	0	0	0	0
ESV_430220	Eukaryota	Arthropoda	Insecta	Diptera	Cecidomyiidae			97.1	0	0	0	0	0	0	0	0	0	0	0	0	0	0	0	0	0	0	0	0	0	0	0	0	0	0	0	0	0	0	0	0	0	0	0	0	0	0	0	0	0
ESV_430222	Eukaryota	Arthropoda	Insecta	Diptera	Cecidomyiidae			98.1	0	0	0	0	0	0	0	0	0	0	0	0	0	0	0	0	0	0	0	0	0	0	0	0	0	0	0	0	0	0	0	0	0	0	0	0	0	0	0	0	0
ESV_430223	Eukaryota	Arthropoda	Insecta	Diptera	Cecidomyiidae			94.9	0	0	0	0	0	0	0	0	0	0	0	0	0	0	0	0	0	0	0	0	0	0	0	0	0	0	0	0	0	0	0	0	0	0	0	0	0	0	0	0	0
ESV_430224	Eukaryota	Arthropoda	Insecta	Diptera	Cecidomyiidae			94.2	0	0	0	0	0	0	0	0	0	0	0	0	0	0	0	0	0	0	0	0	0	0	0	0	0	0	0	0	0	0	0	0	0	0	0	0	0	0	0	0	0
ESV_430234	Eukaryota	Arthropoda	Insecta	Diptera	Cecidomyiidae			99	0	0	0	0	0	0	0	0	0	0	0	0	0	0	0	0	0	0	0	0	0	0	0	0	0	0	0	0	0	0	0	0	0	0	0	0	0	0	0	0	0
ESV_430239	Eukaryota	Arthropoda	Insecta	Diptera	Cecidomyiidae			97.1	0	0	0	0	0	0	0	0	0	0	0	0	0	0	0	0	0	0	0	0	0	0	0	0	0	0	0	0	0	0	0	0	0	0	0	0	0	0	0	0	0
ESV_430243	Eukaryota	Arthropoda	Insecta	Diptera	Cecidomyiidae			96.2	0	0	0	0	0	0	0	0	0	0	0	0	0	0	0	0	0	0	0	0	0	0	0	0	0	0	1	0	0	0	0	0	0	0	0	0	0	0	0	0	0
ESV_430245	Eukaryota	Arthropoda	Insecta	Diptera	Cecidomyiidae			97.8	0	0	0	0	0	0	0	0	0	0	0	0	0	0	0	0	0	0	0	0	0	0	0	0	0	0	0	0	0	0	0	0	0	0	0	0	0	0	0	0	0
ESV_430249	Eukaryota	Arthropoda	Insecta	Diptera	Cecidomyiidae			93.9	0	0	0	0	0	0	0	0	0	0	0	0	0	0	0	0	0	0	0	0	0	0	0	0	0	0	0	0	0	0	0	0	0	0	0	0	0	0	0	0	0
ESV_430255	Eukaryota	Arthropoda	Insecta	Diptera	Cecidomyiidae			97.4	0	0	0	0	0	0	0	0	0	0	0	0	0	0	0	0	0	0	0	0	0	0	0	0	0	0	0	0	0	0	0	0	0	0	0	0	0	0	0	0	0
ESV_430266	Eukaryota	Arthropoda	Insecta	Diptera	Cecidomyiidae			95.5	0	0	0	0	0	0	0	0	0	0	0	0	0	0	0	0	0	0	0	0	0	0	0	0	0	0	0	0	0	0	0	0	0	0	0	0	0	0	0	0	0
ESV_430272	Eukaryota	Arthropoda	Insecta	Diptera	Cecidomyiidae			93.9	0	0	0	0	0	0	0	0	0	0	0	0	0	0	0	0	0	0	0	0	0	0	0	0	0	0	0	0	0	0	0	0	0	0	0	0	0	0	0	0	0
ESV_430274	Eukaryota	Arthropoda	Insecta	Diptera	Cecidomyiidae			94.9	0	0	0	0	0	0	0	0	0	0	0	0	0	0	0	0	0	0	0	0	0	0	0	0	0	0	0	0	0	0	0	0	0	0	0	0	0	0	0	0	0
ESV_430277	Eukaryota	Arthropoda	Insecta	Diptera	Cecidomyiidae			99.7	0	0	0	0	0	0	0	0	0	0	0	0	0	0	0	0	0	0	0	0	0	0	0	0	0	0	0	0	0	0	0	0	0	0	0	0	0	0	0	0	0
ESV_430282	Eukaryota	Arthropoda	Insecta	Diptera	Cecidomyiidae			95.2	0	0	0	0	0	0	0	0	0	0	0	0	0	0	0	0	0	0	0	0	0	0	0	0	0	0	0	0	0	0	0	0	0	0	0	0	0	0	0	0	0
ESV_430284	Eukaryota	Arthropoda	Insecta	Diptera	Cecidomyiidae			100	0	0	0	0	0	0	0	0	0	0	0	0	0	0	0	0	0	0	0	0	0	0	0	0	0	0	0	0	0	0	0	0	0	0	0	0	0	0	0	0	0
ESV_430298	Eukaryota	Arthropoda	Insecta	Diptera	Cecidomyiidae			94.6	0	0	0	0	0	0	0	0	0	0	0	0	0	0	0	0	0	0	0	0	0	0	0	0	0	0	0	0	0	0	0	0	0	0	0	0	0	0	0	0	0
ESV_430306	Eukaryota	Arthropoda	Insecta	Diptera	Cecidomyiidae			100	0	0	0	0	0	0	0	0	0	0	0	0	0	0	0	0	0	0	0	0	0	0	0	0	0	0	0	0	0	0	0	0	0	0	0	0	0	0	0	0	0
ESV_430324	Eukaryota	Arthropoda	Insecta	Diptera	Cecidomyiidae			95.2	0	0	0	0	0	0	0	0	0	0	0	0	0	0	0	0	0	0	0	0	0	0	0	0	0	0	0	0	0	0	0	0	0	0	0	0	0	0	0	0	0
ESV_430355	Eukaryota	Arthropoda	Insecta	Diptera	Cecidomyiidae			93.3	0	0	0	0	0	0	0	0	0	0	0	0	0	0	0	0	0	0	0	0	0	0	0	0	0	0	0	0	0	0	0	0	0	0	0	0	0	0	0	0	0
ESV_430364	Eukaryota	Arthropoda	Insecta	Diptera	Cecidomyiidae			99.4	0	0	0	0	0	0	0	0	0	0	0	0	0	0	0	0	0	0	0	0	0	0	0	0	0	0	0	0	0	0	0	0	0	0	0	0	0	0	0	0	0
ESV_430368	Eukaryota	Arthropoda	Insecta	Diptera	Cecidomyiidae			100	0	0	0	0	0	0	0	0	0	0	0	0	0	0	0	0	0	0	0	0	0	0	0	0	0	0	0	0	0	0	0	0	0	0	0	0	2	0	8	1	0
ESV_430372	Eukaryota	Arthropoda	Insecta	Diptera	Cecidomyiidae			91.7	0	0	0	0	0	0	0	0	0	0	0	0	0	0	0	0	0	0	0	0	0	0	0	0	0	0	0	0	0	0	0	0	0	0	0	0	0	0	0	0	0
ESV_430373	Eukaryota	Arthropoda	Insecta	Lepidoptera				85	0	0	0	0	0	0	0	0	0	0	0	0	0	0	0	0	0	0	0	0	0	0	0	0	0	0	0	0	0	0	0	0	0	0	0	0	0	0	0	0	0
ESV_430382	Eukaryota	Arthropoda	Insecta	Diptera	Cecidomyiidae			99.4	0	0	0	0	0	0	0	0	0	0	0	0	0	0	0	0	0	0	0	0	0	0	0	0	0	0	0	0	0	0	0	0	0	0	0	0	0	0	0	0	0
ESV_430385	Eukaryota	Arthropoda	Insecta	Lepidoptera	Nymphalidae	Opsiphanes	Opsiphanes boisduvallii	99.7	0	1	0	0	0	0	0	0	0	0	0	0	0	0	0	0	0	0	0	0	0	0	0	0	0	0	0	0	0	0	0	0	0	0	0	0	0	0	0	0	0
ESV_430393	Eukaryota	Arthropoda	Insecta	Diptera	Cecidomyiidae			93	0	0	0	0	0	0	0	0	0	0	0	0	0	0	0	0	0	0	0	0	0	0	0	0	0	0	0	0	0	0	0	0	0	0	0	0	0	0	0	0	0
ESV_430395	Eukaryota	Arthropoda	Insecta	Diptera	Cecidomyiidae			94.2	0	0	0	0	0	0	0	0	0	0	0	0	0	0	0	0	0	0	0	0	0	0	0	0	0	0	0	0	0	0	0	0	0	0	0	0	0	0	0	0	0
ESV_430396	Eukaryota	Arthropoda	Insecta	Diptera	Cecidomyiidae			93.9	0	0	0	0	0	0	0	0	0	0	0	0	0	0	0	0	0	0	0	0	0	0	0	0	0	0	0	0	0	0	0	0	0	0	0	0	0	0	0	0	0
ESV_430397	Eukaryota	Arthropoda	Insecta	Diptera	Cecidomyiidae			95.8	0	0	0	0	0	0	0	0	0	0	0	0	0	0	0	0	0	0	0	0	0	0	0	0	0	0	0	0	0	0	0	0	0	0	0	0	0	0	0	0	0
ESV_430400	Eukaryota	Arthropoda	Insecta	Lepidoptera	Geometridae	Tripteridia	Tripteridia decens	93.9	0	0	0	0	0	0	0	0	0	0	0	0	0	0	0	0	0	0	0	0	0	0	0	0	0	0	0	0	0	0	0	0	0	0	0	0	0	0	0	0	0
ESV_430417	Eukaryota	Arthropoda	Insecta	Diptera	Cecidomyiidae			96.5	0	0	0	0	0	0	0	0	0	0	0	0	0	0	0	0	0	0	0	0	0	0	0	0	0	0	0	0	0	0	0	0	0	0	0	0	0	0	0	0	0
ESV_430418	Eukaryota	Arthropoda	Insecta	Diptera	Cecidomyiidae			97.8	0	0	0	0	0	0	0	0	0	0	0	0	0	0	0	0	0	0	0	0	0	0	0	0	0	0	0	0	0	0	0	0	0	0	0	0	0	0	0	0	0
ESV_430426	Eukaryota	Arthropoda	Insecta	Diptera	Cecidomyiidae			97.1	0	0	0	0	0	0	0	0	0	0	0	0	0	0	0	0	0	0	0	0	0	0	0	0	0	0	0	0	0	0	0	0	0	0	0	0	0	0	0	0	0
ESV_430434	Eukaryota	Arthropoda	Insecta	Diptera	Cecidomyiidae			98.7	0	0	0	0	0	0	0	0	0	0	0	0	0	0	335	0	0	0	0	0	0	0	0	0	0	0	0	0	0	0	0	0	0	0	0	0	0	0	0	0	0
ESV_430437	Eukaryota	Arthropoda	Insecta	Diptera	Cecidomyiidae			94.9	0	0	0	0	0	0	0	0	0	0	0	0	0	0	0	0	0	0	0	0	0	0	0	0	0	0	0	0	0	0	0	0	0	0	0	0	0	0	0	0	0
ESV_430438	Eukaryota	Arthropoda	Insecta	Diptera	Cecidomyiidae			94.6	0	0	0	0	0	0	0	0	0	0	0	0	0	0	0	0	0	0	0	0	0	0	0	0	0	0	0	0	0	0	0	0	0	0	0	0	0	0	0	0	0
ESV_430443	Eukaryota	Arthropoda	Insecta	Diptera	Cecidomyiidae			98.1	0	0	0	0	0	0	0	0	0	0	0	0	0	0	0	0	0	0	0	0	0	0	0	0	0	0	0	0	0	0	0	0	0	0	0	0	0	0	0	0	0
ESV_430447	Eukaryota	Arthropoda	Insecta	Diptera	Cecidomyiidae			95.2	0	0	0	0	0	0	0	0	0	0	0	0	0	0	0	0	0	0	0	0	0	0	0	0	0	0	0	0	0	0	0	0	0	0	0	0	0	0	0	0	0
ESV_430451	Eukaryota	Arthropoda	Insecta	Diptera	Cecidomyiidae			94.6	0	0	0	0	0	0	0	0	0	0	0	0	0	0	0	0	0	0	0	0	0	0	0	0	0	0	0	0	0	0	0	0	0	0	0	0	0	0	0	0	0
ESV_430452	Eukaryota	Arthropoda	Insecta	Diptera	Cecidomyiidae			98.7	0	0	0	0	0	0	0	0	0	0	0	0	0	0	0	0	0	0	0	0	0	0	0	0	0	0	0	0	0	0	0	0	0	0	0	0	0	0	0	0	0
ESV_430455	Eukaryota	Arthropoda	Insecta	Diptera	Cecidomyiidae			95.2	0	0	0	0	0	0	0	0	0	0	0	0	0	0	0	0	0	0	0	0	0	0	0	0	0	0	0	0	0	0	0	0	0	0	0	0	0	0	0	0	0
ESV_430456	Eukaryota	Arthropoda	Insecta	Diptera	Cecidomyiidae			99	0	0	0	0	0	0	0	0	0	0	0	0	0	0	0	0	0	0	0	0	0	0	0	0	0	0	0	0	0	0	0	0	0	0	0	0	0	0	0	0	0
ESV_430459	Eukaryota	Arthropoda	Insecta	Diptera	Cecidomyiidae			99.4	0	0	0	0	0	0	0	0	0	0	0	0	0	0	0	0	0	0	0	0	0	0	0	0	0	0	0	0	0	0	0	0	0	0	0	0	0	0	0	0	0
ESV_430487	Eukaryota	Arthropoda	Insecta	Diptera	Cecidomyiidae			96.8	0	0	0	0	0	0	0	0	0	0	0	0	0	0	0	0	0	0	0	0	0	0	0	0	0	0	0	0	0	0	0	0	0	0	0	0	0	0	0	0	0
ESV_430493	Eukaryota	Arthropoda	Insecta	Diptera	Cecidomyiidae			94.9	0	0	0	0	0	0	0	0	0	0	0	0	0	0	0	0	0	0	0	0	0	0	0	0	0	0	0	0	0	0	0	0	0	0	0	0	0	0	0	0	0
ESV_430502	Eukaryota	Arthropoda	Insecta	Diptera	Cecidomyiidae			94.2	0	0	0	0	0	0	0	0	0	0	0	0	0	0	0	0	0	0	0	0	0	0	0	0	0	0	0	0	0	0	0	0	0	0	0	0	0	0	0	0	0
ESV_430503	Eukaryota	Arthropoda	Insecta	Diptera	Cecidomyiidae			94.2	0	0	0	0	0	0	0	0	0	0	0	0	0	0	0	0	0	0	0	0	0	0	0	0	0	0	0	0	0	0	0	0	0	0	0	0	0	0	0	0	0
ESV_430505	Eukaryota	Arthropoda	Insecta	Diptera	Cecidomyiidae			93	0	0	0	0	0	0	0	0	0	0	0	0	0	0	0	0	0	0	0	0	0	0	0	0	0	0	0	0	0	1	0	1	1	0	0	0	0	0	0	0	0
ESV_430510	Eukaryota	Arthropoda	Insecta					95.2	0	0	0	0	0	0	0	0	0	0	0	0	0	0	0	0	0	0	0	0	0	0	0	0	0	0	0	0	0	0	0	0	0	0	0	0	0	0	0	0	0
ESV_430511	Eukaryota	Arthropoda	Insecta	Diptera	Cecidomyiidae			95.2	0	0	0	0	0	0	0	0	0	0	0	0	0	0	0	0	0	0	0	0	0	0	0	0	0	0	0	0	0	0	0	0	0	0	0	0	0	0	0	0	0
ESV_430515	Eukaryota	Arthropoda	Insecta					95.5	0	0	0	0	0	0	0	0	0	0	0	0	0	0	0	0	0	0	0	0	0	0	0	0	0	0	0	0	0	0	0	0	0	0	0	0	0	0	0	0	0
ESV_430516	Eukaryota	Arthropoda	Insecta	Diptera	Cecidomyiidae			96.2	0	0	0	0	0	0	0	0	0	0	0	0	0	0	1	2	0	1	2	0	1	1	0	2	0	0	1	2	0	0	0	0	0	1	1	0	0	0	0	0	0
ESV_430524	Eukaryota	Arthropoda	Insecta	Diptera	Cecidomyiidae			95.8	0	0	0	0	0	0	0	0	0	0	0	0	0	0	0	0	0	0	0	0	0	0	0	0	0	0	0	0	0	0	0	0	0	0	0	0	0	0	0	0	0
ESV_430527	Eukaryota	Arthropoda	Insecta	Diptera	Cecidomyiidae			94.2	0	0	0	0	0	0	0	0	0	0	0	0	0	0	0	0	0	0	0	0	0	0	0	0	0	0	0	0	0	0	0	0	0	0	0	0	0	0	0	0	0
ESV_430547	Eukaryota	Arthropoda	Insecta	Diptera	Cecidomyiidae			95.8	0	0	0	0	0	0	0	0	0	0	0	0	0	0	0	0	0	0	0	0	0	0	0	0	0	0	0	0	0	0	0	0	0	0	0	0	0	0	0	0	0
ESV_430569	Eukaryota	Arthropoda	Insecta	Diptera	Cecidomyiidae			96.5	0	0	0	0	0	0	0	0	0	0	0	0	0	0	1	0	0	0	0	0	0	1	0	0	2	33	67	31	1	4	3	4	3	6	5	0	0	0	0	0	0
ESV_430570	Eukaryota	Arthropoda	Insecta	Diptera	Cecidomyiidae			94.2	0	0	0	0	0	0	0	0	0	0	0	0	0	0	0	0	0	0	0	0	0	0	0	0	0	0	0	0	0	0	0	0	0	0	0	0	0	0	0	0	0
ESV_430573	Eukaryota	Arthropoda	Insecta	Diptera	Cecidomyiidae			96.2	0	0	0	0	0	0	0	0	0	0	0	0	0	0	0	0	0	0	0	0	0	0	0	0	8	1	4	2	2	1	2	2	1	4	1	1	0	0	0	0	0
ESV_430574	Eukaryota	Arthropoda	Insecta	Diptera	Cecidomyiidae			93.3	0	0	0	0	0	0	0	0	0	0	0	0	0	0	0	0	0	0	0	0	0	0	0	0	0	0	0	0	0	0	0	0	0	0	0	0	0	0	0	0	0
ESV_430578	Eukaryota	Arthropoda	Insecta	Diptera	Cecidomyiidae			95.8	0	0	0	0	0	0	0	0	0	0	0	0	0	0	0	0	0	0	0	0	0	0	0	0	0	0	0	0	0	0	0	0	0	0	0	0	0	0	0	0	0
ESV_430579	Eukaryota	Arthropoda	Insecta	Diptera	Cecidomyiidae	Prodiplosis	Prodiplosis floricola	93.9	0	0	0	0	0	0	0	0	0	0	0	0	0	0	0	0	0	0	0	0	0	0	0	0	0	0	0	0	0	0	0	0	0	0	0	0	0	0	0	0	0
ESV_430585	Eukaryota	Arthropoda	Insecta	Diptera	Cecidomyiidae			94.2	0	0	0	0	0	0	0	0	0	0	0	0	0	0	0	0	0	0	0	0	0	0	0	0	0	0	0	0	0	0	0	0	0	0	0	0	0	0	0	0	0
ESV_430605	Eukaryota	Arthropoda	Insecta	Diptera	Cecidomyiidae			94.6	0	0	0	0	0	0	0	0	0	0	0	0	0	0	0	0	0	0	0	0	0	0	0	0	2	82	3	1	1	1	3	0	0	4	1	3	0	0	0	0	0
ESV_430606	Eukaryota	Arthropoda	Insecta	Diptera	Phoridae	Megaselia	Megaselia lucifrons	96.5	1	0	0	0	0	0	0	0	0	0	0	0	0	0	0	0	0	90	0	0	0	0	0	0	0	0	0	0	0	0	0	0	0	0	0	1	0	0	0	0	0
ESV_430619	Eukaryota	Arthropoda	Insecta	Diptera	Cecidomyiidae			94.6	0	0	0	0	0	0	0	0	0	0	0	0	0	0	0	0	0	0	0	0	0	0	0	0	0	0	0	0	0	0	0	0	0	0	0	0	0	0	0	0	0
ESV_430643	Eukaryota	Arthropoda	Insecta	Diptera	Psychodidae			99.7	213	31	8	10	21	38	24	12	38	32	18	28	0	0	0	0	0	0	0	0	0	0	0	0	0	0	0	0	0	0	0	0	0	0	0	0	0	0	0	0	0
ESV_430644	Eukaryota	Arthropoda	Insecta	Diptera	Chironomidae			99.7	0	0	0	0	0	0	0	0	0	0	0	0	0	0	0	0	0	0	0	0	0	0	0	0	0	0	0	0	0	0	0	0	0	0	0	0	0	0	0	0	0
ESV_430645	Eukaryota	Arthropoda	Insecta	Diptera	Cecidomyiidae			95.8	0	0	0	0	0	0	0	0	0	0	0	0	0	0	0	0	0	0	0	0	0	0	0	0	0	0	0	0	0	0	0	0	0	0	0	0	0	0	0	0	0
ESV_430656	Eukaryota	Arthropoda	Insecta	Hymenoptera				99.4	0	0	0	0	0	0	0	0	0	0	0	0	0	0	0	0	0	0	0	0	0	0	0	0	0	0	0	0	0	0	0	0	0	0	0	0	0	0	0	0	0
ESV_430663	Eukaryota	Arthropoda	Insecta	Diptera	Cecidomyiidae			99.4	0	0	0	0	0	0	0	0	0	0	0	0	0	0	0	0	0	0	0	0	0	0	0	0	0	0	0	0	0	0	0	0	0	0	0	0	0	0	0	0	0
ESV_430669	Eukaryota	Arthropoda	Insecta	Hemiptera				98.1	0	0	0	0	0	1	0	0	0	0	0	0	0	0	0	0	0	0	0	0	0	0	0	0	0	0	0	0	0	0	0	0	0	0	0	0	0	0	0	0	0
ESV_430672	Eukaryota	Arthropoda	Insecta	Lepidoptera	Nymphalidae	Bicyclus	Bicyclus smithi	100	0	0	0	0	0	0	0	0	0	0	0	0	0	0	0	0	0	0	0	0	0	0	0	0	0	0	0	0	0	0	0	0	0	0	0	0	0	0	0	0	0
ESV_430688	Eukaryota	Arthropoda	Insecta	Diptera	Cecidomyiidae			98.4	0	0	0	0	0	0	0	0	0	0	0	0	0	0	0	0	0	0	0	0	0	0	0	0	0	0	0	0	0	0	0	0	0	0	0	0	0	0	0	0	0
ESV_430694	Eukaryota	Arthropoda	Insecta	Diptera	Cecidomyiidae			99	0	0	0	0	0	0	0	0	0	0	0	0	0	0	0	0	0	0	0	0	0	0	0	0	0	0	0	0	0	0	0	0	0	0	0	0	0	0	0	0	0
ESV_430703	Eukaryota	Arthropoda	Insecta	Diptera	Cecidomyiidae			100	0	0	0	0	0	0	0	0	0	0	0	0	0	0	0	0	0	0	0	0	0	0	0	0	0	0	0	0	0	0	0	0	0	0	0	0	0	0	0	0	0
ESV_430704	Eukaryota	Arthropoda	Insecta	Lepidoptera	Geometridae	Maxates	Maxates imitans	86.9	0	0	0	0	0	0	0	0	0	0	0	0	0	0	0	0	0	0	0	0	0	0	0	0	0	0	0	0	0	0	0	0	0	0	0	0	0	0	0	0	0
ESV_430708	Eukaryota	Arthropoda	Insecta	Diptera	Cecidomyiidae			93.2	0	0	0	0	0	0	0	0	0	0	0	0	0	0	0	0	0	0	0	0	0	0	0	0	0	0	0	0	0	0	0	0	0	0	0	0	0	0	0	0	0
ESV_430718	Eukaryota	Arthropoda	Insecta	Diptera	Cecidomyiidae			97.4	0	0	0	0	0	0	0	0	0	0	0	0	0	0	0	0	0	0	0	0	0	0	0	0	0	0	0	0	0	0	0	0	0	0	0	0	0	0	0	0	0
ESV_430719	Eukaryota	Arthropoda	Insecta	Diptera	Cecidomyiidae			96.2	0	0	0	0	0	0	0	0	0	0	0	0	0	0	0	0	0	0	0	0	0	0	0	0	0	0	0	0	0	0	0	0	0	0	0	0	0	0	0	0	0
ESV_430725	Eukaryota	Chordata	Aves	Passeriformes	Parulidae	Setophaga	Setophaga castanea	100	0	0	0	0	0	0	0	0	0	0	0	0	62	0	0	0	0	0	0	0	0	0	0	0	0	11	0	0	0	0	0	0	0	0	0	0	0	0	0	0	0
ESV_430729	Eukaryota	Arthropoda	Insecta	Diptera	Cecidomyiidae			94.6	1	0	0	0	0	0	0	0	0	0	0	0	0	0	0	0	0	0	0	0	0	0	0	0	0	0	0	0	0	0	0	0	0	0	0	0	0	0	0	0	0
ESV_430736	Eukaryota	Arthropoda	Insecta	Hymenoptera				89	0	0	0	0	0	0	0	0	0	0	0	0	0	0	0	0	0	0	0	0	0	0	0	0	0	0	0	0	0	0	0	0	0	0	0	0	0	0	0	0	0
ESV_430740	Eukaryota	Arthropoda	Insecta	Diptera	Cecidomyiidae			100	0	0	0	0	0	0	0	0	0	0	0	0	0	0	0	0	0	0	0	0	0	0	0	0	0	0	0	0	0	0	0	0	0	0	0	0	0	0	0	0	0
ESV_430746	Eukaryota	Arthropoda	Insecta	Hymenoptera	Trichogrammatidae			90.9	0	0	0	0	0	0	0	0	0	0	0	0	0	0	0	0	0	0	0	0	0	0	0	0	0	0	0	0	0	0	0	0	0	0	0	0	0	0	0	0	0
ESV_430751	Eukaryota	Arthropoda	Insecta	Diptera	Psychodidae			95.2	0	0	0	0	0	0	0	0	0	0	0	0	0	0	0	0	0	0	0	0	0	0	0	0	0	0	0	0	0	0	0	0	0	0	0	0	0	0	0	0	0
ESV_430752	Eukaryota	Arthropoda	Insecta	Hymenoptera	Trichogrammatidae			90.6	0	0	0	0	0	0	0	0	0	0	0	0	0	0	0	0	0	0	0	0	0	0	0	0	0	0	0	0	0	0	0	0	0	0	0	0	0	0	0	0	0
ESV_430754	Eukaryota	Arthropoda	Insecta	Diptera	Tachinidae	Acaulona	Acaulona costata	93.4	0	0	0	0	0	0	0	0	0	0	0	0	0	0	0	0	0	0	0	0	0	0	0	0	0	0	0	0	0	0	0	0	0	0	0	0	0	0	0	0	0
ESV_430757	Eukaryota	Arthropoda	Insecta	Hymenoptera	Trichogrammatidae			88.6	0	0	0	0	0	0	0	0	0	0	0	0	0	0	0	0	0	0	0	0	0	0	0	0	0	0	0	0	0	0	0	0	0	0	0	0	0	0	0	0	0
ESV_430760	Eukaryota	Arthropoda	Insecta	Hymenoptera	Trichogrammatidae			89.9	0	0	0	0	0	0	0	0	0	0	0	0	0	0	0	0	0	0	0	0	0	0	0	0	0	0	0	0	0	0	0	0	0	0	0	0	0	0	0	0	0
ESV_430762	Eukaryota	Arthropoda	Insecta	Hemiptera				92.1	0	0	0	0	0	0	0	0	0	0	0	0	0	0	0	0	0	0	0	0	0	0	0	0	0	0	0	0	0	0	0	0	0	0	0	0	0	0	0	0	0
ESV_430772	Eukaryota	Arthropoda	Insecta	Psocodea	Caeciliusidae			100	0	0	0	0	0	0	0	0	0	0	0	0	0	0	0	0	0	0	0	0	0	0	0	0	0	0	0	0	0	0	0	0	0	0	0	0	0	0	0	0	0
ESV_430777	Eukaryota	Arthropoda	Insecta	Diptera	Cecidomyiidae			95.5	0	0	0	0	0	0	0	0	0	0	0	0	0	0	0	0	0	0	0	0	0	0	0	0	0	0	0	0	0	0	0	0	0	0	0	0	0	0	0	0	0
ESV_430779	Eukaryota	Arthropoda	Insecta	Diptera	Cecidomyiidae			99.7	0	0	0	0	0	0	0	0	0	0	0	0	2	1	3	1	0	1	0	1	2	0	0	0	0	0	0	0	0	0	0	0	0	0	0	0	0	0	0	0	0
ESV_430783	Eukaryota	Arthropoda	Insecta	Hymenoptera	Formicidae	Crematogaster	Crematogaster carinata	100	0	0	0	0	0	0	0	0	0	0	0	0	0	0	0	0	0	0	0	0	0	1	0	0	0	0	0	0	0	0	0	0	0	0	0	0	0	0	0	0	0
ESV_430788	Eukaryota	Arthropoda	Insecta	Diptera	Cecidomyiidae			95.2	0	0	0	0	0	0	0	0	0	0	0	0	0	0	0	0	0	0	0	0	0	0	0	0	0	0	0	0	0	0	0	0	0	0	0	0	0	0	0	0	0
ESV_430790	Eukaryota	Arthropoda	Insecta	Diptera	Cecidomyiidae			94.9	0	0	0	0	0	0	0	0	0	0	0	0	0	0	0	0	0	0	0	0	0	0	0	0	0	0	0	0	0	0	0	0	0	0	0	0	0	0	0	0	0
ESV_430792	Eukaryota	Arthropoda	Insecta	Diptera	Cecidomyiidae			94.6	0	0	0	0	0	0	0	0	0	0	0	0	0	0	0	0	0	0	0	0	0	0	0	0	3	3	2	8	3	2	3	2	3	8	3	1	0	0	0	0	0
ESV_430793	Eukaryota	Arthropoda	Insecta	Hymenoptera	Aphelinidae			96.4	0	0	0	0	0	0	0	0	0	0	0	0	0	0	0	0	0	0	0	0	0	0	0	0	0	0	0	0	0	0	0	0	0	0	0	0	0	0	0	0	0
ESV_430809	Eukaryota	Arthropoda	Insecta	Lepidoptera				97.4	0	0	0	0	0	0	0	0	0	0	0	0	0	0	0	0	0	0	0	0	0	0	0	0	0	0	0	0	0	0	0	0	0	0	0	0	0	0	0	0	0
ESV_430818	Eukaryota	Arthropoda	Insecta	Diptera	Cecidomyiidae			95.5	0	0	0	0	0	0	0	0	0	0	0	0	0	0	0	0	0	0	0	0	0	0	0	0	0	0	0	0	0	0	0	0	0	0	0	0	0	0	0	0	0
ESV_430819	Eukaryota	Arthropoda	Insecta	Diptera	Cecidomyiidae			96.2	0	0	0	0	0	0	0	0	0	0	0	0	0	0	0	0	0	0	0	0	0	0	0	0	0	0	0	0	0	0	0	0	0	0	0	0	0	0	0	0	0
ESV_430831	Eukaryota	Arthropoda	Insecta	Diptera	Cecidomyiidae			94.2	0	0	0	0	0	0	0	0	0	0	0	0	0	0	0	0	0	0	0	0	0	0	0	0	0	0	0	0	0	0	0	0	0	0	0	0	0	0	0	0	0
ESV_430886	Eukaryota	Arthropoda	Insecta	Diptera	Cecidomyiidae			96.8	0	0	0	0	0	0	0	0	0	0	0	0	0	0	0	0	0	0	0	0	0	0	0	0	0	0	0	0	0	0	0	0	0	0	0	0	0	0	0	0	0
ESV_430891	Eukaryota	Arthropoda	Insecta	Diptera	Cecidomyiidae			99	0	0	0	0	0	0	0	0	0	0	0	0	0	0	0	0	0	0	0	0	0	0	0	0	0	0	0	0	0	0	0	0	0	0	0	0	0	0	0	0	0
ESV_430896	Eukaryota	Arthropoda	Insecta	Hemiptera	Anthocoridae	Orius	Orius niger	88.7	0	0	0	0	0	0	0	0	0	0	0	0	0	0	0	0	0	0	0	0	0	0	0	0	0	0	0	0	0	0	0	0	0	0	0	0	0	0	0	0	0
ESV_430900	Eukaryota	Arthropoda	Insecta	Diptera	Cecidomyiidae			93.9	0	0	0	0	0	0	0	0	0	0	0	0	0	0	0	0	0	0	0	0	0	0	0	0	0	0	0	0	0	0	0	0	0	0	0	0	0	0	0	0	0
ESV_430915	Eukaryota	Chordata	Aves	Tinamiformes	Tinamidae	Tinamus	Tinamus major	99	0	0	0	0	0	0	0	0	0	0	0	0	0	0	105	1	0	0	0	1	0	0	0	0	0	0	0	0	0	0	0	0	0	0	2	0	0	0	0	0	0
ESV_430942	Eukaryota	Arthropoda	Insecta	Coleoptera	Curculionidae			86.6	0	0	0	0	0	0	0	0	0	0	0	0	0	0	0	0	0	0	0	0	0	0	0	0	0	0	0	0	0	0	0	0	0	0	0	0	0	0	0	0	0
ESV_430950	Eukaryota	Arthropoda	Insecta	Diptera	Cecidomyiidae			92	0	0	0	0	0	0	0	0	0	0	0	0	0	0	0	0	0	0	0	0	0	0	0	0	1	69	0	0	1	0	0	1	0	2	0	0	0	0	0	0	0
ESV_430959	Eukaryota	Arthropoda	Insecta	Diptera	Psychodidae			92.9	0	0	0	0	0	0	0	0	0	0	0	0	0	0	0	0	0	0	0	0	0	0	0	0	0	0	0	0	0	0	0	0	0	0	0	0	0	0	0	0	0
ESV_430960	Eukaryota	Arthropoda	Insecta	Diptera	Cecidomyiidae			99.7	0	0	0	0	0	0	0	0	0	0	0	0	0	0	0	0	0	0	0	0	0	0	0	0	0	0	0	0	0	0	0	0	0	0	0	0	0	0	0	0	0
ESV_430961	Eukaryota	Arthropoda	Insecta	Diptera	Cecidomyiidae			92	0	0	0	0	0	0	0	0	0	0	0	0	0	0	0	0	0	0	0	0	0	0	0	0	0	0	0	0	0	0	0	0	0	0	0	0	0	0	0	0	0
ESV_430962	Eukaryota	Arthropoda	Insecta	Diptera	Cecidomyiidae			99.7	0	0	0	0	0	0	0	0	0	0	0	0	0	0	0	0	0	0	0	0	0	0	0	0	0	0	0	0	0	0	0	0	0	0	0	0	0	0	0	0	0
ESV_430964	Eukaryota	Arthropoda	Insecta	Diptera	Cecidomyiidae			93.3	0	0	0	0	0	0	0	0	0	0	0	0	0	0	0	0	0	0	0	0	0	0	0	0	0	0	0	0	0	0	0	0	0	0	0	0	0	0	0	0	0
ESV_430971	Eukaryota	Arthropoda	Insecta	Diptera	Cecidomyiidae			92	0	0	0	0	0	0	0	0	0	0	0	0	0	0	0	0	0	0	0	0	0	0	0	0	0	0	0	0	0	0	0	0	0	0	0	0	0	0	0	0	0
ESV_430975	Eukaryota	Arthropoda	Insecta	Diptera	Cecidomyiidae			96.5	0	0	0	0	0	0	0	0	0	0	0	0	0	0	0	0	0	0	0	0	0	0	0	0	0	0	0	0	0	0	0	0	0	0	0	0	0	0	0	0	0
ESV_430980	Eukaryota	Arthropoda	Insecta	Diptera	Cecidomyiidae			95.2	0	0	0	0	0	0	0	0	0	0	0	0	0	0	0	0	0	0	0	0	0	0	0	0	0	0	0	0	0	0	0	0	0	0	0	0	0	0	0	0	0
ESV_430997	Eukaryota	Arthropoda	Insecta					88.2	0	0	0	0	0	0	0	0	0	0	0	0	0	0	0	0	0	0	0	0	0	0	0	0	0	0	0	0	0	0	0	0	0	0	0	0	0	0	0	0	0
ESV_431023	Eukaryota	Arthropoda	Insecta	Diptera	Cecidomyiidae			100	0	0	0	0	0	0	0	0	0	0	0	0	0	0	0	0	0	0	0	0	0	0	0	0	0	0	0	0	0	0	0	0	0	0	0	0	0	0	0	0	0
ESV_431024	Eukaryota	Arthropoda	Insecta	Diptera	Cecidomyiidae			96.8	0	0	0	0	0	0	0	0	0	0	0	0	0	0	0	0	0	0	0	0	0	0	0	0	0	0	0	0	0	0	0	0	0	0	0	0	0	0	0	0	0
ESV_431025	Eukaryota	Arthropoda	Insecta	Diptera	Cecidomyiidae			99.4	0	0	0	0	0	0	0	0	0	0	0	0	0	0	0	0	0	0	0	0	0	0	0	0	0	0	0	0	0	0	0	0	0	0	0	0	0	0	0	0	0
ESV_431026	Eukaryota	Arthropoda	Insecta	Diptera	Cecidomyiidae			97.1	0	0	0	0	0	0	0	0	0	0	0	0	0	0	0	0	0	0	0	0	0	0	0	0	0	0	0	0	0	0	0	0	0	0	0	0	0	0	0	0	0
ESV_431027	Eukaryota	Arthropoda	Insecta	Diptera	Cecidomyiidae			95.2	0	0	0	0	0	0	0	0	0	0	0	0	0	0	0	0	0	0	0	0	0	0	0	0	0	0	0	0	0	0	0	0	0	0	0	0	0	0	0	0	0
ESV_431030	Eukaryota	Arthropoda	Insecta	Diptera	Cecidomyiidae			99	0	0	0	0	0	0	0	0	0	0	0	0	0	0	0	0	0	0	0	0	0	0	0	0	0	0	0	0	0	0	0	0	0	0	0	0	0	0	0	0	0
ESV_431033	Eukaryota	Arthropoda	Insecta	Diptera	Cecidomyiidae			97.1	0	0	0	0	0	0	0	0	0	0	0	0	0	0	0	0	0	0	0	0	0	0	0	0	0	0	1	0	2	0	0	0	2	0	0	0	0	0	0	0	0
ESV_431034	Eukaryota	Arthropoda	Insecta	Diptera	Cecidomyiidae			95.5	0	0	0	0	0	0	0	0	0	0	0	0	0	0	0	0	0	0	0	0	0	0	0	0	0	0	0	0	0	0	0	0	0	0	0	0	0	0	0	0	0
ESV_431035	Eukaryota	Arthropoda	Insecta	Diptera	Cecidomyiidae			99.7	0	0	0	0	0	0	0	0	0	0	0	0	0	0	0	0	0	0	0	0	0	0	0	0	0	0	0	0	0	0	0	0	0	0	0	0	0	0	0	0	0
ESV_431036	Eukaryota	Arthropoda	Insecta	Diptera	Cecidomyiidae			99.7	0	0	0	0	0	0	0	0	0	0	0	0	0	0	0	0	0	0	0	0	0	0	0	0	0	0	0	0	0	0	0	0	0	0	0	0	0	0	0	0	0
ESV_431038	Eukaryota	Arthropoda	Insecta	Diptera	Cecidomyiidae			94.2	0	0	0	0	0	0	0	0	0	0	0	0	0	0	0	0	0	0	0	0	0	0	0	0	0	0	0	0	0	0	0	0	0	0	0	0	0	0	0	0	0
ESV_431039	Eukaryota	Arthropoda	Insecta	Diptera	Cecidomyiidae			93.9	0	0	0	0	0	0	0	0	0	0	0	0	0	0	0	0	0	0	0	0	0	0	0	0	0	0	0	0	0	0	0	0	0	0	0	0	0	0	0	0	0
ESV_431042	Eukaryota	Arthropoda	Insecta					95.8	0	0	0	0	0	0	0	0	0	0	0	0	0	0	0	0	0	0	0	0	0	0	0	0	0	0	0	0	0	0	0	0	0	0	0	0	0	0	0	0	0
ESV_431046	Eukaryota	Arthropoda	Insecta	Hymenoptera	Formicidae	Crematogaster	Crematogaster AAP4067	100	0	0	0	0	0	0	0	0	0	0	0	0	0	0	0	0	0	0	0	0	0	0	0	0	0	0	0	0	0	0	0	0	0	0	0	0	0	0	0	0	0
ESV_431049	Eukaryota	Arthropoda	Insecta	Diptera	Cecidomyiidae			96.2	0	0	0	0	0	0	0	0	0	0	0	0	0	0	0	0	0	0	0	0	0	0	0	0	0	0	0	0	0	0	0	0	0	0	0	0	0	0	0	0	0
ESV_431053	Eukaryota	Arthropoda	Insecta	Diptera	Cecidomyiidae			95.5	0	0	0	0	0	0	0	0	0	0	0	0	0	0	0	0	0	0	0	0	0	0	0	0	0	0	0	0	0	0	0	0	0	0	0	0	0	0	0	0	0
ESV_431054	Eukaryota	Arthropoda	Insecta					95.8	0	0	0	0	0	0	0	0	0	0	0	0	0	0	0	0	0	0	0	0	0	0	0	0	0	0	0	0	0	0	0	0	0	0	0	0	0	0	0	0	0
ESV_431067	Eukaryota	Arthropoda	Insecta	Diptera	Cecidomyiidae			93.9	0	0	0	0	0	0	0	0	0	0	0	0	0	0	0	0	0	0	0	0	0	0	0	0	0	0	0	0	0	0	0	0	0	0	0	0	0	0	0	0	0
ESV_431071	Eukaryota	Arthropoda	Insecta	Diptera	Cecidomyiidae			94.6	0	0	0	0	0	0	0	0	0	0	0	0	0	0	0	0	0	0	0	0	0	0	0	0	0	0	0	0	0	0	0	0	0	0	0	0	0	0	0	0	0
ESV_431080	Eukaryota	Arthropoda	Insecta	Diptera	Cecidomyiidae			95.8	0	0	0	0	0	0	0	0	0	0	0	0	0	0	0	0	0	0	0	0	0	0	0	0	0	0	0	0	0	0	0	0	0	0	0	0	0	0	0	0	0
ESV_431082	Eukaryota	Arthropoda	Insecta	Diptera	Cecidomyiidae			94.6	0	0	0	0	0	0	0	0	0	0	0	0	0	0	0	0	0	0	0	0	0	0	0	0	0	0	0	0	0	0	0	0	0	1	0	0	0	0	0	0	0
ESV_431084	Eukaryota	Arthropoda	Insecta	Diptera	Cecidomyiidae			94.9	0	0	0	0	0	0	0	0	0	0	0	0	0	0	0	0	0	0	0	0	0	0	0	0	0	0	0	0	0	0	0	0	0	0	0	0	0	0	0	0	0
ESV_431088	Eukaryota	Arthropoda	Insecta	Diptera				96.8	0	0	0	0	0	0	0	0	0	0	0	0	0	0	0	0	0	0	0	0	0	0	0	0	0	0	0	0	0	0	0	0	0	0	0	0	0	0	0	0	0
ESV_431089	Eukaryota	Arthropoda	Insecta	Diptera	Cecidomyiidae			94.2	0	0	0	0	0	0	0	0	0	0	0	0	0	0	0	0	0	0	0	0	0	0	0	0	0	0	0	0	0	0	0	0	0	0	0	0	0	0	0	0	0
ESV_431094	Eukaryota	Arthropoda	Insecta	Diptera	Cecidomyiidae			95.5	0	0	0	0	0	0	0	0	0	0	0	0	0	0	0	0	0	0	0	0	0	0	0	0	0	0	0	0	0	0	0	0	0	0	0	0	0	0	0	0	0
ESV_431095	Eukaryota	Arthropoda	Insecta	Diptera	Cecidomyiidae			95.8	0	0	0	0	0	0	0	0	0	0	0	0	0	0	0	0	0	0	0	0	0	0	0	0	0	0	0	0	0	0	0	0	0	0	0	0	0	0	0	0	0
ESV_431096	Eukaryota	Arthropoda	Insecta	Diptera	Cecidomyiidae			94.2	0	0	0	0	0	0	0	0	0	0	0	0	0	0	0	0	0	0	0	0	0	0	0	0	0	0	0	0	0	0	0	0	0	0	0	0	0	0	0	0	0
ESV_431101	Eukaryota	Arthropoda	Insecta	Diptera	Cecidomyiidae			94.6	0	0	0	0	0	0	0	0	0	0	0	0	0	0	0	0	0	0	0	0	0	0	0	0	0	0	0	0	0	0	0	0	0	0	0	0	0	0	0	0	0
ESV_431113	Eukaryota	Arthropoda	Insecta	Diptera	Cecidomyiidae			92.7	0	0	0	0	0	0	0	0	0	0	0	0	0	0	0	0	0	0	0	0	0	0	0	0	0	0	0	0	0	0	0	0	0	0	0	0	0	0	0	0	0
ESV_431120	Eukaryota	Arthropoda	Insecta	Diptera	Cecidomyiidae			93	0	0	0	0	0	0	0	0	0	0	0	0	0	0	0	0	0	0	0	0	0	0	0	0	0	0	0	0	0	0	0	0	0	0	0	0	0	0	0	0	0
ESV_431122	Eukaryota	Arthropoda	Insecta	Diptera	Phoridae			99.7	0	0	0	0	0	0	0	0	0	0	0	0	0	0	0	0	0	0	0	0	0	0	0	0	0	0	0	0	0	0	0	0	0	0	0	0	0	0	0	0	0
ESV_431128	Eukaryota	Arthropoda	Insecta	Diptera	Cecidomyiidae			93.6	0	0	0	0	0	0	0	0	0	0	0	0	0	0	0	0	0	0	0	0	0	0	0	0	0	0	0	0	0	0	0	0	0	0	0	0	0	0	0	0	0
ESV_431134	Eukaryota	Arthropoda	Insecta	Diptera	Phoridae			95.8	0	0	0	0	0	0	0	0	0	0	0	0	0	0	0	0	0	0	0	0	0	0	0	0	0	0	0	0	0	0	0	0	0	0	0	0	0	0	0	0	0
ESV_431136	Eukaryota	Arthropoda	Insecta	Hemiptera				87.9	0	0	0	0	0	0	0	0	0	0	0	0	0	0	0	0	0	0	0	0	0	0	0	0	0	0	0	0	0	0	0	0	0	0	0	0	0	0	0	0	0
ESV_431142	Eukaryota	Arthropoda	Insecta	Diptera	Cecidomyiidae			99.4	0	0	0	0	0	0	0	0	0	0	0	0	0	0	0	0	0	0	0	0	0	0	0	0	0	0	0	0	0	0	0	0	0	0	0	0	0	0	0	0	0
ESV_431150	Eukaryota	Arthropoda	Insecta	Diptera	Cecidomyiidae			93	0	0	0	0	0	0	0	0	0	0	0	0	0	0	0	0	0	0	0	0	0	0	0	0	0	0	0	0	0	0	0	0	0	0	0	0	0	0	0	0	0
ESV_431185	Eukaryota	Arthropoda	Insecta	Diptera	Cecidomyiidae			99.7	0	0	0	0	0	0	0	0	0	0	0	0	0	0	0	0	0	0	0	0	0	0	0	0	0	0	0	0	0	0	0	0	0	0	0	0	0	0	0	0	0
ESV_431208	Eukaryota	Arthropoda	Insecta	Diptera	Psychodidae			99	0	0	0	0	0	0	0	0	0	1015	0	0	0	0	0	0	0	0	0	0	0	0	0	0	0	0	0	0	0	0	0	0	0	0	0	0	0	0	0	0	0
ESV_431210	Eukaryota	Arthropoda	Insecta	Lepidoptera	Adelidae	Adela	Adela septentrionella	96.8	0	0	0	0	0	0	0	0	0	0	0	0	0	0	0	0	0	0	0	0	0	0	0	0	0	0	0	0	0	0	0	0	0	0	0	0	0	0	0	0	0
ESV_431211	Eukaryota	Arthropoda	Insecta	Diptera	Cecidomyiidae			95.8	0	0	0	0	0	0	0	0	0	0	0	0	0	0	0	0	0	0	0	0	0	0	0	0	0	0	0	0	0	0	0	0	0	0	0	0	0	0	0	0	0
ESV_431212	Eukaryota	Arthropoda	Insecta	Diptera	Cecidomyiidae			93.9	0	0	0	0	0	0	0	0	0	0	0	0	0	0	0	0	0	0	0	0	0	0	0	0	0	0	0	0	0	0	0	0	0	0	0	0	0	0	0	0	0
ESV_431218	Eukaryota	Arthropoda	Insecta	Diptera	Cecidomyiidae			98.1	0	0	0	0	0	0	0	0	0	0	0	0	0	0	0	0	0	0	0	0	0	0	0	0	0	0	0	0	0	0	0	0	0	0	0	0	0	0	0	0	0
ESV_431223	Eukaryota	Arthropoda	Insecta	Diptera	Cecidomyiidae			100	0	0	0	0	0	0	0	0	0	0	0	0	0	0	0	0	0	0	0	0	0	0	0	0	0	0	0	0	0	0	0	0	0	0	0	0	0	0	0	0	0
ESV_431225	Eukaryota	Arthropoda	Insecta	Diptera	Psychodidae	Pintomyia	Pintomyia ovallesi	98.1	0	0	0	0	0	0	0	0	0	0	0	0	0	0	0	0	0	0	0	0	0	0	0	0	0	0	0	0	0	0	0	0	0	0	0	0	0	0	0	0	0
ESV_431233	Eukaryota	Arthropoda	Insecta	Psocodea	Caeciliusidae			100	0	0	0	0	0	0	0	0	0	0	0	0	0	0	0	0	0	0	0	0	0	0	0	0	0	0	0	0	0	0	0	0	0	0	0	0	0	1	0	0	0
ESV_431238	Eukaryota	Arthropoda	Insecta	Diptera	Cecidomyiidae			95.2	0	0	0	0	0	0	0	0	0	0	0	0	0	0	0	0	0	0	0	0	0	0	0	0	0	0	0	0	0	0	0	0	0	0	0	0	0	0	0	0	0
ESV_431246	Eukaryota	Arthropoda	Insecta	Diptera	Cecidomyiidae			94.9	0	0	0	0	0	0	0	0	0	0	0	0	0	0	0	0	0	0	0	0	0	0	0	0	0	0	0	0	0	0	0	0	0	0	0	0	0	0	0	0	0
ESV_431255	Eukaryota	Arthropoda	Insecta	Diptera	Cecidomyiidae			92.3	0	0	0	0	0	0	0	0	0	0	0	0	0	0	0	0	0	0	0	0	0	0	0	0	0	0	0	0	0	0	0	0	0	0	0	0	0	0	0	0	0
ESV_431267	Eukaryota	Arthropoda	Insecta	Diptera	Cecidomyiidae			93.6	0	0	0	0	0	0	0	0	0	0	0	0	0	0	0	0	0	0	0	0	0	0	0	0	0	0	0	0	0	0	0	0	0	0	0	0	0	0	0	0	0
ESV_431269	Eukaryota	Arthropoda	Insecta	Diptera	Cecidomyiidae			95.8	0	0	0	0	0	0	0	0	0	0	0	0	0	0	0	0	0	0	0	0	0	0	0	0	0	0	0	0	0	0	0	0	0	0	0	0	0	0	0	0	0
ESV_431270	Eukaryota	Arthropoda	Insecta	Diptera	Cecidomyiidae			99.4	0	0	0	0	0	0	0	0	0	0	0	0	0	0	0	0	0	0	0	0	0	0	0	0	0	0	0	0	0	0	0	0	0	0	0	0	0	0	0	0	0
ESV_431275	Eukaryota	Arthropoda	Insecta	Diptera	Cecidomyiidae			96.2	0	0	0	0	0	0	0	0	0	0	0	0	0	0	0	0	0	0	0	0	0	0	0	0	0	0	0	0	0	0	0	0	0	0	0	0	0	0	0	0	0
ESV_431276	Eukaryota	Arthropoda	Arachnida	Trombidiformes	Anystidae			100	0	0	0	0	0	0	0	0	0	0	0	0	0	0	0	0	0	0	0	0	0	0	0	0	0	0	0	0	0	0	0	0	0	0	0	0	0	0	0	0	0
ESV_431277	Eukaryota	Arthropoda	Insecta	Diptera	Cecidomyiidae			100	0	0	0	0	0	0	0	0	0	0	0	0	0	0	0	0	0	0	0	0	0	0	0	0	0	0	0	0	0	0	0	0	0	0	0	0	0	0	0	0	0
ESV_431279	Eukaryota	Arthropoda	Insecta	Diptera	Cecidomyiidae			97.1	0	0	0	0	0	0	0	0	0	0	0	0	0	0	0	0	0	0	0	0	0	0	0	0	0	0	0	0	0	0	0	0	0	0	0	0	0	0	0	0	0
ESV_431285	Eukaryota	Arthropoda	Insecta	Diptera	Cecidomyiidae			96.2	0	0	0	0	0	0	0	0	0	0	0	0	0	0	0	0	0	0	0	0	0	0	0	0	0	0	0	0	0	0	0	0	0	0	0	0	0	0	0	0	0
ESV_431288	Eukaryota	Arthropoda	Insecta	Diptera	Cecidomyiidae			95.8	0	0	0	0	0	0	0	0	0	0	0	0	0	0	0	0	0	0	0	0	0	0	0	0	0	0	0	0	0	0	0	0	0	0	0	0	0	0	0	0	0
ESV_431289	Eukaryota	Arthropoda	Insecta	Diptera	Cecidomyiidae			93.9	0	0	0	0	0	0	0	0	0	0	0	0	0	0	0	0	0	0	0	0	0	0	0	0	0	0	0	0	0	0	0	0	0	0	0	0	0	0	0	0	0
ESV_431293	Eukaryota	Arthropoda	Insecta	Diptera	Cecidomyiidae			94.9	0	0	0	0	0	0	0	0	0	0	0	0	0	0	0	0	0	0	0	0	0	0	0	0	0	0	0	0	0	0	0	0	0	0	0	0	0	0	0	0	0
ESV_431295	Eukaryota	Arthropoda	Insecta	Diptera	Cecidomyiidae			97.1	0	0	0	0	0	0	0	0	0	0	0	0	0	0	0	0	0	0	0	0	0	0	0	0	0	0	0	0	0	0	0	0	0	0	0	0	0	0	0	0	0
ESV_431296	Eukaryota	Arthropoda	Insecta	Diptera	Cecidomyiidae			99.7	0	0	0	0	0	0	0	0	0	0	0	0	0	0	0	0	0	0	0	0	0	0	0	0	0	0	0	0	0	0	0	0	0	0	0	0	0	0	0	0	0
ESV_431318	Eukaryota	Arthropoda	Insecta	Diptera	Cecidomyiidae			95.2	0	0	0	0	0	0	0	0	0	0	0	0	0	0	0	0	0	0	0	0	0	0	0	0	0	0	0	0	0	0	0	0	0	0	0	0	0	0	0	0	0
ESV_431323	Eukaryota	Arthropoda	Insecta	Diptera	Cecidomyiidae	Prodiplosis	Prodiplosis floricola	99.7	0	0	0	0	0	0	0	0	0	0	0	0	0	0	0	0	0	0	0	0	0	0	0	0	0	0	0	0	0	0	0	0	0	0	0	0	0	0	0	0	0
ESV_431324	Eukaryota	Arthropoda	Insecta	Diptera	Cecidomyiidae			94.2	0	0	0	0	0	0	0	0	0	0	0	0	0	0	0	0	0	0	0	0	0	0	0	0	0	0	0	0	0	0	0	0	0	0	0	0	0	0	0	0	0
ESV_431331	Eukaryota	Arthropoda	Insecta	Diptera	Cecidomyiidae			93.6	0	0	0	0	0	0	0	0	0	0	0	0	0	0	0	0	0	0	0	0	0	0	0	0	0	0	0	0	0	0	0	0	0	0	0	0	0	0	0	0	0
ESV_431339	Eukaryota	Arthropoda	Insecta	Diptera	Cecidomyiidae			95.5	0	0	0	0	0	0	0	0	0	0	0	0	0	0	0	0	0	0	0	0	0	0	0	0	0	0	0	0	0	0	0	0	0	0	0	0	0	0	0	0	0
ESV_431343	Eukaryota	Arthropoda	Insecta	Diptera	Cecidomyiidae			96.5	0	0	0	0	0	0	0	0	0	0	0	0	0	0	0	0	0	0	0	0	0	0	0	0	0	0	0	0	0	0	0	0	0	0	0	0	0	0	0	0	0
ESV_431346	Eukaryota	Arthropoda	Insecta	Diptera	Psychodidae			98.7	0	0	0	0	0	0	0	0	0	0	0	0	0	0	0	0	0	0	0	0	0	0	0	0	0	0	0	0	0	0	0	0	0	0	0	0	0	0	0	0	0
ESV_431351	Eukaryota	Arthropoda	Insecta	Diptera	Cecidomyiidae			100	0	0	0	0	0	0	0	0	0	0	0	0	0	0	0	0	0	0	0	0	0	0	0	0	0	0	0	0	0	0	0	0	0	0	0	0	0	0	0	0	0
ESV_431353	Eukaryota	Arthropoda	Insecta	Diptera	Cecidomyiidae			100	0	0	0	0	0	0	0	0	0	0	0	0	0	0	0	0	0	0	0	0	0	0	0	0	0	0	0	0	0	0	0	0	0	0	0	0	0	0	0	0	0
ESV_431357	Eukaryota	Arthropoda	Arachnida	Trombidiformes	Tydeidae			86.9	0	0	0	0	0	0	0	0	0	0	0	0	0	0	0	0	0	0	0	0	0	0	0	0	0	0	0	0	0	0	0	0	0	0	0	0	0	0	0	0	0
ESV_431360	Eukaryota	Arthropoda	Insecta	Diptera	Cecidomyiidae			96.5	0	0	0	0	0	0	0	0	0	0	0	0	0	0	0	0	0	0	0	0	0	0	0	0	0	0	0	0	0	0	0	0	0	0	0	0	0	0	0	0	0
ESV_431363	Eukaryota	Arthropoda	Insecta	Diptera	Chironomidae			90.7	0	0	0	0	0	0	0	0	0	0	0	0	0	0	0	0	0	0	0	0	0	0	0	0	0	0	0	0	0	0	0	0	0	0	0	0	0	0	0	0	0
ESV_431364	Eukaryota	Arthropoda	Insecta	Lepidoptera	Geometridae	Problepsis	Problepsis apollinaria	95.8	0	0	0	0	0	0	0	0	0	0	0	0	0	0	0	0	0	0	0	0	0	0	0	0	0	0	0	0	0	0	0	0	0	0	0	0	0	0	0	0	0
ESV_431365	Eukaryota	Arthropoda	Insecta	Diptera	Cecidomyiidae			98.4	0	0	0	0	0	0	0	0	0	0	0	0	0	0	0	0	0	0	0	0	0	0	0	0	0	0	0	0	0	0	0	0	0	0	0	0	0	0	0	0	0
ESV_431367	Eukaryota	Arthropoda	Insecta	Diptera	Cecidomyiidae			100	0	0	0	0	0	0	0	0	0	0	0	0	0	0	0	0	0	0	0	0	0	0	0	0	0	0	0	0	0	0	0	0	0	0	0	0	0	0	0	0	0
ESV_431372	Eukaryota	Arthropoda	Insecta	Diptera	Cecidomyiidae			94.2	0	0	0	0	0	0	0	0	0	0	0	0	0	0	0	0	0	0	0	0	0	0	0	0	0	0	0	0	0	0	0	0	0	0	0	0	0	0	0	0	0
ESV_431373	Eukaryota	Arthropoda	Insecta	Diptera	Cecidomyiidae			97.1	0	0	0	0	0	0	0	0	0	0	0	0	0	0	0	0	0	0	0	0	0	0	0	0	0	0	0	0	0	0	0	0	0	0	0	0	0	0	0	0	0
ESV_431374	Eukaryota	Arthropoda	Insecta	Diptera	Psychodidae	Micropygomyia	Micropygomyia trinidadensis	99.7	0	0	0	0	0	0	0	0	0	0	0	0	0	0	0	0	0	0	0	0	0	0	0	0	0	0	0	0	0	0	0	0	0	0	0	0	0	0	0	0	0
ESV_431380	Eukaryota	Arthropoda	Insecta	Diptera	Cecidomyiidae			95.5	0	0	0	0	0	0	0	0	0	0	0	0	55	5	8	7	4	4	7	2	6	17	3	5	0	0	0	0	0	0	0	0	0	0	0	0	0	0	0	0	0
ESV_431382	Eukaryota	Arthropoda	Insecta	Diptera	Cecidomyiidae			99.4	0	0	0	0	0	0	0	0	0	0	0	0	0	0	0	0	0	0	0	0	0	0	0	0	0	0	0	0	0	0	0	0	0	0	0	0	0	0	0	0	0
ESV_431384	Eukaryota	Arthropoda	Insecta	Diptera	Cecidomyiidae			96.2	0	0	0	0	0	0	0	0	0	0	0	0	0	0	0	0	0	0	0	0	0	0	0	0	0	0	0	0	0	0	0	0	0	0	0	0	0	0	0	0	0
ESV_431403	Eukaryota	Arthropoda	Insecta	Diptera	Cecidomyiidae			99.7	0	0	0	0	0	0	0	0	0	0	0	0	0	0	0	0	0	0	0	0	0	0	0	0	0	0	0	0	0	0	0	0	0	0	0	0	0	0	0	0	0
ESV_431407	Eukaryota	Arthropoda	Insecta	Diptera	Cecidomyiidae			99	0	0	0	0	0	0	0	0	0	0	0	0	0	0	0	0	0	0	0	0	0	0	0	0	0	0	0	0	0	0	0	0	0	0	0	0	0	0	0	0	0
ESV_431408	Eukaryota	Arthropoda	Insecta					99	0	0	0	0	0	0	0	0	0	0	0	0	0	0	0	0	0	0	0	0	0	0	0	0	0	0	0	0	0	0	0	0	0	0	0	0	0	0	0	0	0
ESV_431413	Eukaryota	Arthropoda	Insecta	Lepidoptera	Nepticulidae	Acalyptris		97.1	0	0	0	0	0	0	0	0	0	0	0	0	0	0	0	0	0	0	0	0	0	0	0	0	0	0	0	0	0	0	0	0	0	0	0	0	0	0	0	0	0
ESV_431419	Eukaryota	Arthropoda	Insecta	Diptera	Cecidomyiidae			100	0	0	0	0	0	0	0	0	0	0	0	0	0	0	0	0	0	0	0	0	0	0	0	0	0	0	0	0	0	0	0	0	0	0	0	0	0	0	0	0	0
ESV_431421	Eukaryota	Arthropoda	Insecta	Coleoptera				96.8	0	0	0	0	0	0	0	0	0	0	0	0	0	0	0	0	0	0	0	0	0	0	0	0	0	0	0	0	0	0	0	0	0	0	0	0	0	0	0	0	0
ESV_431423	Eukaryota	Arthropoda	Insecta	Lepidoptera				87.5	0	0	0	0	0	0	0	0	0	0	0	0	0	0	0	0	0	0	0	0	0	0	0	0	0	0	0	0	0	0	0	0	6	0	0	0	1585	9	1	4	11
ESV_431424	Eukaryota	Arthropoda	Insecta	Diptera	Cecidomyiidae			95.8	0	0	0	0	0	0	0	0	0	0	0	0	0	0	0	0	0	0	0	0	0	0	0	0	0	0	0	0	0	0	0	0	0	0	0	0	0	0	0	0	0
ESV_431429	Eukaryota	Arthropoda	Insecta	Lepidoptera	Gelechiidae	Helcystogramma	Helcystogramma sp. ABX8999	96.2	0	0	0	0	0	0	0	0	0	0	0	0	1	0	0	0	0	0	0	0	0	0	0	0	0	0	0	0	0	0	0	0	0	0	0	0	0	0	0	0	0
ESV_431430	Eukaryota	Arthropoda	Insecta	Diptera	Cecidomyiidae			95.8	0	0	0	0	0	0	0	0	0	0	0	0	0	0	0	0	0	0	0	0	0	0	0	0	0	0	0	0	0	0	0	0	0	0	0	0	0	0	0	0	0
ESV_431433	Eukaryota	Arthropoda	Insecta	Diptera	Cecidomyiidae			95.5	0	0	0	0	0	0	0	0	0	0	0	0	0	0	0	0	0	0	0	0	0	0	0	0	0	0	0	0	0	0	0	0	0	0	0	0	0	0	0	0	0
ESV_431439	Eukaryota	Arthropoda	Insecta	Diptera	Cecidomyiidae			95.8	0	0	0	0	0	0	0	0	0	0	0	0	0	0	0	0	0	0	0	0	0	0	0	0	0	0	0	0	0	0	0	0	0	0	0	0	0	0	0	0	0
ESV_431442	Eukaryota	Arthropoda	Insecta	Diptera	Cecidomyiidae			95.2	0	0	0	0	0	0	0	0	0	0	0	0	0	0	0	0	0	0	0	0	0	0	0	0	0	0	0	0	0	0	0	0	0	0	0	0	0	0	0	0	0
ESV_431450	Eukaryota	Arthropoda	Insecta	Diptera	Cecidomyiidae			95.5	0	0	0	0	0	0	0	0	0	0	0	0	0	0	0	0	0	0	0	0	0	0	0	0	0	0	0	0	0	0	0	0	0	0	0	0	0	0	0	0	0
ESV_431453	Eukaryota	Arthropoda	Insecta	Diptera	Cecidomyiidae			99.7	0	0	0	0	0	0	0	0	0	0	0	0	0	0	0	0	0	0	0	0	0	0	0	0	0	0	0	0	0	0	0	0	0	0	0	0	0	0	0	0	0
ESV_431454	Eukaryota	Arthropoda	Insecta	Diptera	Cecidomyiidae			96.2	0	0	0	0	0	0	0	0	0	0	0	0	0	0	0	0	0	0	0	0	0	0	0	0	0	0	0	1	0	0	0	0	0	0	0	0	0	0	0	0	0
ESV_431483	Eukaryota	Arthropoda	Insecta	Diptera	Cecidomyiidae			99	0	0	0	0	0	0	0	0	0	0	0	0	0	0	0	0	0	0	0	0	0	0	0	0	0	0	0	0	0	0	0	0	0	0	0	0	0	0	0	0	0
ESV_431487	Eukaryota	Arthropoda	Insecta	Diptera	Cecidomyiidae			96.5	0	0	0	0	0	0	0	0	0	0	0	0	0	0	0	0	0	0	0	0	0	0	0	0	0	0	0	0	0	0	0	0	0	0	0	0	0	0	0	0	0
ESV_431488	Eukaryota	Arthropoda	Insecta	Diptera	Cecidomyiidae			99.7	0	0	0	0	0	0	0	0	0	0	0	0	0	0	0	0	0	0	0	0	0	0	0	0	0	0	0	0	0	0	0	0	0	0	0	0	0	0	0	0	0
ESV_431490	Eukaryota	Arthropoda	Insecta	Diptera	Cecidomyiidae			100	0	0	0	0	0	0	0	0	0	0	0	0	0	0	0	0	0	0	0	0	0	0	0	0	0	0	0	0	0	0	0	0	0	0	0	0	0	0	0	0	0
ESV_431494	Eukaryota	Arthropoda	Insecta	Diptera	Cecidomyiidae			95.2	0	0	0	0	0	0	0	0	0	0	0	0	0	0	0	0	0	0	0	0	0	0	0	0	0	0	0	0	0	0	0	0	0	0	0	0	0	0	0	0	0
ESV_431499	Eukaryota	Arthropoda	Insecta	Diptera	Cecidomyiidae			99.7	0	0	0	0	0	0	0	0	0	0	0	0	0	0	0	0	0	0	0	0	0	0	0	0	0	0	0	0	0	0	0	0	0	0	0	0	0	0	0	0	0
ESV_431505	Eukaryota	Arthropoda	Insecta	Diptera	Cecidomyiidae			98.1	0	0	0	0	0	0	0	0	0	0	0	0	0	0	0	0	0	0	0	0	0	0	0	0	0	0	0	0	0	0	0	0	0	0	0	0	0	0	0	0	0
ESV_431506	Eukaryota	Arthropoda	Insecta	Diptera	Cecidomyiidae			94.9	0	0	0	0	0	0	0	0	0	0	0	0	0	0	0	0	0	0	0	0	0	0	0	0	9	0	0	4	0	0	0	0	1	0	1	0	0	0	0	0	0
ESV_431523	Eukaryota	Arthropoda	Insecta	Lepidoptera	Nepticulidae	Muhabbetana	Muhabbetana royenicola	96.5	0	0	0	0	0	0	0	0	0	0	0	0	0	0	0	0	0	0	0	0	0	0	0	0	0	0	0	0	0	0	0	0	0	0	0	0	0	0	0	0	0
ESV_431530	Eukaryota	Arthropoda	Insecta	Diptera	Cecidomyiidae			98.7	0	0	0	0	0	0	0	0	0	0	0	0	0	0	0	0	0	0	0	0	0	0	0	0	0	0	0	0	0	0	0	0	0	0	0	0	0	0	0	0	0
ESV_431531	Eukaryota	Arthropoda	Insecta	Diptera	Cecidomyiidae			94.9	0	0	0	0	0	0	0	0	0	0	0	0	0	0	0	0	0	0	0	0	0	0	0	0	0	0	0	0	0	0	0	0	0	0	0	0	0	0	0	0	0
ESV_431533	Eukaryota	Arthropoda	Insecta	Diptera				100	0	0	0	0	0	0	0	0	0	0	0	0	0	0	0	0	0	0	0	0	0	0	0	0	0	0	0	0	0	0	0	0	0	0	0	0	0	0	0	0	0
ESV_431535	Eukaryota	Arthropoda	Insecta	Diptera	Cecidomyiidae			94.2	0	0	0	0	0	0	0	0	0	0	0	0	0	0	0	0	0	0	0	0	0	0	0	0	0	0	0	0	0	0	0	0	0	0	0	0	0	0	0	0	0
ESV_431536	Eukaryota	Arthropoda	Insecta	Diptera	Cecidomyiidae			99.4	0	0	0	0	0	0	0	0	0	0	0	0	0	0	0	0	0	0	0	0	0	0	0	0	0	0	0	0	0	0	0	0	0	0	0	0	0	0	0	0	0
ESV_431538	Eukaryota	Arthropoda	Insecta	Diptera	Cecidomyiidae			90.1	0	0	0	0	0	0	0	0	0	0	0	0	0	0	0	0	0	0	0	0	0	0	0	0	0	0	0	0	0	0	0	0	0	0	0	0	0	0	0	0	0
ESV_431542	Eukaryota	Arthropoda	Insecta	Diptera	Cecidomyiidae			98.4	0	0	0	0	0	0	0	0	0	0	0	0	0	0	0	0	0	0	0	0	0	0	0	0	0	0	0	0	0	0	0	0	0	0	0	0	0	0	0	0	0
ESV_431543	Eukaryota	Arthropoda	Insecta					87.9	0	0	0	0	0	0	0	0	0	0	0	0	0	0	0	0	0	0	0	0	0	0	0	0	0	0	0	0	0	0	0	0	0	0	0	0	0	0	0	0	0
ESV_431548	Eukaryota	Arthropoda	Insecta	Diptera	Cecidomyiidae			94.9	0	0	0	0	0	0	0	0	0	0	0	0	0	0	0	0	0	0	0	0	0	0	0	0	0	0	0	0	0	0	0	0	0	0	0	0	0	0	0	0	0
ESV_431549	Eukaryota	Arthropoda	Insecta	Diptera	Cecidomyiidae			93.9	0	0	0	0	0	0	0	0	0	0	0	0	0	0	0	0	0	0	0	0	0	0	0	0	0	0	0	0	0	0	0	0	0	0	0	0	0	0	0	0	0
ESV_431551	Eukaryota	Arthropoda	Insecta	Diptera	Cecidomyiidae			93.9	0	0	0	0	0	0	0	0	0	0	0	0	0	0	0	0	0	0	0	0	0	0	0	0	0	0	0	0	0	0	0	0	0	0	0	0	0	0	0	0	0
ESV_431567	Eukaryota	Arthropoda	Insecta	Diptera	Cecidomyiidae			99	0	0	0	0	0	0	0	0	0	0	0	0	0	0	0	0	0	0	0	0	0	0	0	0	0	0	0	0	0	0	0	0	0	0	0	0	0	0	0	0	0
ESV_431568	Eukaryota	Arthropoda	Insecta	Diptera	Cecidomyiidae			96.2	0	0	0	0	0	0	0	0	0	0	0	0	0	0	0	0	0	0	0	0	0	0	0	0	0	0	0	0	0	0	0	0	0	0	0	0	0	0	0	0	0
ESV_431569	Eukaryota	Arthropoda	Insecta	Diptera	Cecidomyiidae			99	0	0	0	0	0	0	0	0	0	0	0	0	0	0	0	0	0	0	0	0	0	0	0	0	0	0	0	0	0	0	0	0	0	0	0	0	0	0	0	0	0
ESV_431573	Eukaryota	Arthropoda	Insecta	Diptera	Cecidomyiidae			98.1	0	0	0	0	0	0	0	0	0	0	0	0	0	0	0	0	0	0	0	0	0	0	0	0	0	0	0	0	0	0	0	0	0	0	0	0	0	0	0	0	0
ESV_431575	Eukaryota	Arthropoda	Insecta					95.8	0	0	0	0	0	0	0	0	0	0	0	0	0	0	0	0	0	0	0	0	0	0	0	0	0	0	0	0	0	0	0	0	0	0	0	0	0	0	0	0	0
ESV_431580	Eukaryota	Arthropoda	Insecta	Diptera	Cecidomyiidae			96.8	0	0	0	0	0	0	0	0	0	0	0	0	0	0	0	0	0	0	0	0	0	0	0	0	0	0	0	0	0	0	0	0	0	0	0	0	0	0	0	0	0
ESV_431586	Eukaryota	Arthropoda	Insecta	Diptera	Psychodidae	Psychodopygus	Psychodopygus panamensis	98.4	0	0	0	0	0	0	0	0	0	0	0	0	0	0	0	0	0	0	0	0	0	0	0	0	0	0	0	0	0	0	0	0	0	0	0	0	0	0	0	0	0
ESV_431590	Eukaryota	Arthropoda	Insecta	Diptera	Cecidomyiidae			95.5	0	0	0	0	0	0	0	0	0	0	0	0	0	0	0	0	0	0	0	0	0	0	0	0	0	0	0	0	0	0	0	0	0	0	0	0	0	0	0	0	0
ESV_431595	Eukaryota	Arthropoda	Insecta	Diptera	Cecidomyiidae			99.7	0	0	0	0	0	0	0	0	0	0	0	0	0	0	0	0	0	0	0	0	0	0	0	0	0	0	0	0	0	0	0	0	0	0	0	0	0	0	0	0	0
ESV_431596	Eukaryota	Arthropoda	Insecta	Diptera	Cecidomyiidae			99.7	0	0	0	0	0	0	0	0	0	0	0	0	0	0	0	0	0	0	0	0	0	0	0	0	0	0	0	0	0	0	0	0	0	0	0	0	0	0	0	0	0
ESV_431605	Eukaryota	Arthropoda	Insecta	Diptera	Cecidomyiidae			97.4	0	0	0	0	0	0	0	0	0	0	0	0	0	0	0	0	0	0	0	0	0	0	0	0	0	0	0	0	0	0	0	0	0	0	0	0	0	0	0	0	0
ESV_431606	Eukaryota	Arthropoda	Insecta	Diptera				92.7	0	0	0	0	0	0	0	0	0	0	0	0	0	0	0	0	0	0	0	0	0	0	0	0	0	0	0	0	0	0	0	0	0	0	0	0	0	0	0	0	0
ESV_431612	Eukaryota	Arthropoda	Insecta					99.4	0	0	0	0	0	0	0	0	0	0	0	0	0	0	0	0	0	0	0	0	0	0	0	0	0	0	0	0	0	0	0	0	0	0	0	0	0	0	0	0	0
ESV_431619	Eukaryota	Arthropoda	Insecta	Diptera	Cecidomyiidae			92.7	0	0	0	0	0	0	0	0	0	0	0	0	0	0	0	0	0	0	0	0	0	0	0	0	0	0	0	0	0	0	0	0	0	0	0	0	0	0	0	0	0
ESV_431620	Eukaryota	Arthropoda	Insecta	Lepidoptera	Pyralidae	Acrobasis	Acrobasis indigenella	85	0	0	0	0	0	0	0	0	0	0	0	0	32	5	8	6	7	1	8	7	2	6	5	9	0	0	0	0	0	0	0	0	0	0	0	0	0	0	0	0	0
ESV_431622	Eukaryota	Arthropoda	Insecta	Diptera	Cecidomyiidae			95.8	0	0	0	0	0	0	0	0	0	0	0	0	0	0	0	0	0	0	0	0	0	0	0	0	0	0	0	0	0	0	0	0	0	0	0	0	0	0	0	0	0
ESV_431625	Eukaryota	Arthropoda	Insecta	Diptera	Cecidomyiidae			96.8	0	0	0	0	0	0	0	0	0	0	0	0	0	0	0	0	0	0	0	0	0	0	0	0	0	0	0	0	0	0	0	0	0	0	0	0	0	0	0	0	0
ESV_431633	Eukaryota	Arthropoda	Insecta	Diptera	Cecidomyiidae			95.5	0	0	0	0	0	0	0	0	0	0	0	0	0	0	0	0	0	0	0	0	0	0	0	0	0	0	0	0	0	0	0	0	0	0	0	0	0	0	0	0	0
ESV_431634	Eukaryota	Arthropoda	Insecta	Diptera	Cecidomyiidae			97.8	0	0	0	0	0	0	0	0	0	0	0	0	0	0	0	0	0	0	0	0	0	0	0	0	0	0	0	0	0	0	0	0	0	0	0	0	0	0	0	0	0
ESV_431639	Eukaryota	Arthropoda	Insecta	Diptera	Cecidomyiidae			100	0	0	0	0	0	0	0	0	0	0	0	0	0	0	0	0	0	0	0	0	0	0	0	0	0	0	0	0	0	0	0	0	0	0	0	0	0	0	0	0	0
ESV_431640	Eukaryota	Arthropoda	Insecta	Diptera	Cecidomyiidae			100	0	0	0	0	0	0	0	0	0	0	0	0	0	0	0	0	0	0	0	0	0	0	0	0	0	0	0	0	0	0	0	0	0	0	0	0	0	0	0	0	0
ESV_431648	Eukaryota	Arthropoda	Insecta	Diptera	Cecidomyiidae			96.5	0	0	0	0	0	0	0	0	0	0	0	0	0	0	0	0	0	0	0	0	0	0	0	0	0	0	0	0	0	0	0	0	0	0	0	0	0	0	0	0	0
ESV_431649	Eukaryota	Arthropoda	Insecta	Diptera	Cecidomyiidae			96.5	0	0	0	0	0	0	0	0	0	0	0	0	0	0	0	0	0	0	0	0	0	0	0	0	0	0	0	0	0	0	0	0	0	0	0	0	0	0	0	0	0
ESV_431664	Eukaryota	Arthropoda	Insecta	Diptera	Cecidomyiidae			95.5	0	0	0	0	0	0	0	0	0	0	0	0	0	0	0	0	0	0	0	0	0	0	0	0	0	0	0	0	0	0	0	0	0	0	0	0	0	0	0	0	0
ESV_431672	Eukaryota	Arthropoda	Insecta	Diptera	Cecidomyiidae			96.2	0	0	0	0	0	0	0	0	0	0	0	0	0	0	0	0	0	0	0	0	0	0	0	0	0	0	0	0	0	0	0	0	0	0	0	0	0	0	0	0	0
ESV_431674	Eukaryota	Arthropoda	Insecta	Diptera	Cecidomyiidae			99.7	0	0	0	0	0	0	0	0	0	0	0	0	0	0	0	0	0	0	0	0	0	0	0	0	0	0	0	0	0	0	0	0	0	0	0	0	0	0	0	0	0
ESV_431677	Eukaryota	Arthropoda	Insecta	Diptera	Cecidomyiidae			98.7	0	0	0	0	0	0	0	0	0	0	0	0	0	0	0	0	0	0	0	0	0	0	0	0	0	0	0	0	0	0	0	0	0	0	0	0	0	0	0	0	0
ESV_431680	Eukaryota	Arthropoda	Insecta	Diptera	Cecidomyiidae			99.7	0	0	0	0	0	0	0	0	0	0	0	0	0	0	0	0	0	0	0	0	0	0	0	0	0	0	0	0	0	0	0	0	0	0	0	0	0	0	0	0	0
ESV_431683	Eukaryota	Arthropoda	Insecta	Diptera	Cecidomyiidae			96.5	0	0	0	0	0	0	0	0	0	0	0	0	0	0	0	0	0	0	0	0	0	0	0	0	0	0	0	0	0	0	0	0	0	0	0	0	0	0	0	0	0
ESV_431684	Eukaryota	Arthropoda	Insecta	Diptera	Cecidomyiidae			95.2	0	0	0	0	0	0	0	0	0	0	0	0	16	5	9	2	8	7	5	3	5	9	4	5	0	0	0	0	0	0	2	0	0	0	0	1	0	0	0	0	0
ESV_431688	Eukaryota	Arthropoda	Insecta	Diptera	Cecidomyiidae			95.8	0	0	0	0	0	0	0	0	0	0	0	0	0	0	0	0	1	0	0	1	0	0	0	2	0	0	0	0	0	0	0	0	0	0	0	0	0	0	0	0	0
ESV_431689	Eukaryota	Arthropoda	Insecta	Diptera	Cecidomyiidae			93.6	0	0	0	0	0	0	0	0	0	0	0	0	0	0	0	0	0	0	0	0	0	0	0	0	0	0	0	0	0	0	0	0	0	0	0	0	0	0	0	0	0
ESV_431704	Eukaryota	Arthropoda	Insecta	Diptera	Cecidomyiidae			94.6	0	0	0	0	0	0	0	0	0	0	0	0	1	0	0	2	0	1	0	0	0	1	1	1	2	1	2	1	4	0	1	1	3	4	1	1	0	0	0	0	0
ESV_431705	Eukaryota	Arthropoda	Insecta	Diptera	Cecidomyiidae			98.1	0	0	0	0	0	0	0	0	0	0	0	0	0	0	0	0	0	0	0	0	0	0	0	0	0	0	0	0	0	0	0	0	0	0	0	0	0	0	0	0	0
ESV_431716	Eukaryota	Arthropoda	Insecta	Diptera	Cecidomyiidae			95.8	0	0	0	0	0	0	0	0	0	0	0	0	0	0	0	0	0	0	0	0	0	0	0	0	0	0	0	0	0	0	0	1	0	0	0	0	0	0	0	0	0
ESV_431727	Eukaryota	Arthropoda	Insecta	Diptera	Cecidomyiidae			93.9	0	0	0	0	0	0	0	0	0	0	0	0	0	0	0	0	0	0	0	0	0	0	0	0	0	0	0	0	0	0	0	0	0	0	0	0	0	0	0	0	0
ESV_431736	Eukaryota	Arthropoda	Insecta	Diptera	Cecidomyiidae			96.5	0	0	0	0	0	0	0	0	0	0	0	0	0	0	0	0	0	0	0	0	0	0	0	0	0	0	0	0	0	0	0	0	0	0	0	0	0	0	0	0	0
ESV_431741	Eukaryota	Arthropoda	Insecta	Diptera	Cecidomyiidae			93.3	0	0	0	0	0	0	0	0	0	0	0	0	0	0	0	0	0	0	0	0	0	0	0	0	0	0	0	0	0	0	0	0	0	0	0	0	0	0	0	0	0
ESV_431743	Eukaryota	Arthropoda	Insecta	Diptera	Cecidomyiidae			99.4	0	0	0	0	0	0	0	0	0	0	0	0	0	0	0	0	0	0	0	0	0	0	0	0	0	0	0	0	0	0	0	0	0	0	0	0	0	0	0	0	0
ESV_431744	Eukaryota	Arthropoda	Insecta	Diptera	Cecidomyiidae			95.5	0	0	0	0	0	0	0	0	0	0	0	0	0	0	0	0	0	0	0	0	0	0	0	0	0	0	0	0	0	0	0	0	0	0	0	0	0	0	0	0	0
ESV_431755	Eukaryota	Arthropoda	Insecta	Diptera	Cecidomyiidae			96.2	0	0	0	0	0	0	0	0	0	0	0	0	0	0	0	0	0	0	0	0	0	0	0	0	0	0	0	0	0	0	0	0	0	0	0	0	0	0	0	0	0
ESV_431758	Eukaryota	Arthropoda	Insecta	Diptera	Cecidomyiidae			99.7	0	0	0	0	0	0	0	0	0	0	0	0	0	0	0	0	0	0	0	0	0	0	0	0	0	0	0	0	0	0	0	0	0	0	0	0	0	0	0	0	0
ESV_431761	Eukaryota	Arthropoda	Insecta	Diptera	Cecidomyiidae			92.7	0	0	0	0	0	0	0	0	0	0	0	0	0	0	0	0	0	0	0	0	0	0	0	0	0	0	0	0	0	0	0	0	0	0	0	0	0	0	0	0	0
ESV_431774	Eukaryota	Arthropoda	Insecta	Diptera	Cecidomyiidae			93.6	0	0	0	0	0	0	0	0	0	0	0	0	0	0	0	0	0	0	0	0	0	0	0	0	0	0	0	0	0	0	0	0	0	0	0	0	0	0	0	0	0
ESV_431776	Eukaryota	Arthropoda	Insecta	Diptera	Cecidomyiidae			96.5	0	0	0	0	0	0	0	0	0	0	0	0	0	0	0	0	0	0	0	0	0	0	0	0	0	0	0	0	0	0	0	0	0	0	0	0	0	0	0	0	0
ESV_431787	Eukaryota	Arthropoda	Insecta					94.9	0	0	0	0	0	0	0	0	0	0	0	0	0	0	0	0	0	0	0	0	0	0	0	0	0	0	0	0	0	0	0	0	0	0	0	0	0	0	0	0	0
ESV_431788	Eukaryota	Arthropoda	Insecta	Diptera	Cecidomyiidae			93.3	0	0	0	0	0	0	0	0	0	0	0	0	0	0	0	0	0	0	0	0	0	0	0	0	0	0	0	0	0	0	0	0	0	0	0	0	0	0	0	0	0
ESV_431789	Eukaryota	Arthropoda	Insecta	Hymenoptera				88.9	0	0	0	0	0	0	0	0	0	0	0	0	0	0	0	0	0	0	0	0	0	0	0	0	0	0	0	0	0	0	0	0	0	0	0	0	0	0	0	0	0
ESV_431797	Eukaryota	Arthropoda	Insecta	Diptera	Cecidomyiidae			93.6	0	0	0	0	0	0	0	0	0	0	0	0	0	0	0	0	0	0	0	0	0	0	0	0	0	0	0	0	0	0	0	0	0	0	0	0	0	0	0	0	0
ESV_431799	Eukaryota	Arthropoda	Insecta	Diptera	Cecidomyiidae			97.1	0	0	0	0	0	0	0	0	0	0	0	0	0	0	0	0	0	0	0	0	0	0	0	0	0	0	0	0	0	0	0	0	0	0	0	0	0	0	0	0	0
ESV_431827	Eukaryota	Arthropoda	Insecta	Diptera	Cecidomyiidae			94.9	0	0	0	0	0	0	0	0	0	0	0	0	0	0	0	0	0	0	0	0	0	0	0	0	0	0	0	0	0	0	0	0	0	0	0	0	0	0	0	0	0
ESV_431829	Eukaryota	Arthropoda	Insecta	Diptera	Cecidomyiidae			94.9	0	0	0	0	0	0	0	0	0	0	0	0	0	0	0	0	0	0	0	0	0	0	0	0	0	0	0	0	0	0	0	0	0	0	0	0	0	0	0	0	0
ESV_431840	Eukaryota	Arthropoda	Insecta	Diptera	Cecidomyiidae			97.8	0	0	0	0	0	0	0	0	0	0	0	0	0	0	0	0	0	0	0	0	0	0	0	0	0	0	0	0	0	0	0	0	0	0	0	0	0	0	0	0	0
ESV_431867	Eukaryota	Arthropoda	Insecta	Diptera	Cecidomyiidae			99.4	0	0	0	0	0	0	0	0	0	0	0	0	0	0	0	0	0	0	0	0	0	0	0	0	0	0	0	0	0	0	0	0	0	0	0	0	0	0	0	0	0
ESV_431869	Eukaryota	Arthropoda	Insecta	Hemiptera				88.2	0	0	0	0	0	0	0	0	0	0	0	0	0	0	0	0	0	0	0	0	0	0	0	0	0	0	0	0	0	0	0	0	0	0	0	0	0	0	0	0	0
ESV_431872	Eukaryota	Arthropoda	Insecta	Diptera	Cecidomyiidae			95.8	0	0	0	0	0	0	0	0	0	0	0	0	0	0	0	0	0	0	0	0	0	0	0	0	0	0	0	0	0	0	0	0	0	0	0	0	0	0	0	0	0
ESV_431874	Eukaryota	Arthropoda	Insecta	Diptera	Cecidomyiidae			94.6	0	0	0	0	0	0	0	0	0	0	0	0	0	0	0	0	0	0	0	0	0	0	0	0	0	0	0	0	0	0	0	0	0	0	0	0	0	0	0	0	0
ESV_431876	Eukaryota	Arthropoda	Insecta	Diptera	Cecidomyiidae			94.5	0	0	0	0	0	0	0	0	0	0	0	0	0	0	1	1	0	1	0	0	0	0	2	0	0	0	0	0	0	0	0	0	0	0	0	0	0	0	0	0	0
ESV_431878	Eukaryota	Arthropoda	Arachnida	Trombidiformes	Tydeidae			87.5	0	0	0	0	0	0	0	0	0	0	0	0	0	0	0	0	0	0	0	0	0	52	0	0	0	0	0	0	0	0	0	0	0	0	0	0	0	0	0	0	0
ESV_431889	Eukaryota	Arthropoda	Insecta	Diptera	Cecidomyiidae			93.3	0	0	0	0	0	0	0	0	0	0	0	0	0	0	0	0	0	0	0	0	0	0	1	0	0	0	0	0	0	0	0	0	0	0	0	0	0	0	0	0	0
ESV_431895	Eukaryota	Arthropoda	Insecta	Diptera	Cecidomyiidae			92.9	0	0	0	0	0	0	0	0	0	0	0	0	0	0	0	0	0	0	0	0	0	0	0	0	0	0	0	0	0	0	0	0	0	0	0	0	0	0	0	0	0
ESV_431904	Eukaryota	Arthropoda	Insecta	Lepidoptera	Noctuidae	Cucullia	Cucullia argentea	95.2	0	0	0	0	0	0	0	0	0	0	0	0	0	0	0	0	0	0	0	0	0	0	0	0	0	0	0	0	0	0	0	0	0	0	0	0	0	0	0	0	0
ESV_431921	Eukaryota	Arthropoda	Insecta	Diptera	Cecidomyiidae			96.2	0	0	0	0	0	0	0	0	0	0	0	0	0	0	0	0	0	0	0	0	0	0	0	0	0	0	0	0	0	0	0	0	0	0	0	0	0	0	0	0	0
ESV_431922	Eukaryota	Arthropoda	Insecta	Diptera	Cecidomyiidae			94.6	0	0	0	0	0	0	0	0	0	0	0	0	0	0	0	0	0	0	0	0	0	0	0	0	0	0	0	0	0	0	0	0	0	0	0	0	0	0	0	0	0
ESV_431923	Eukaryota	Arthropoda	Insecta	Diptera	Cecidomyiidae			95.5	0	0	0	0	0	0	0	0	0	0	0	0	0	0	0	0	0	0	0	0	0	0	0	0	0	0	0	0	0	0	0	0	0	0	0	0	0	0	0	0	0
ESV_431924	Eukaryota	Arthropoda	Insecta	Diptera	Cecidomyiidae			95.2	0	0	0	0	0	0	0	0	0	0	0	0	0	0	0	0	0	0	0	0	0	0	0	0	0	0	0	0	0	0	0	0	0	0	0	0	0	0	0	0	0
ESV_431926	Eukaryota	Arthropoda	Insecta	Diptera	Cecidomyiidae			93.6	0	0	0	0	0	0	0	0	0	0	0	0	0	0	0	0	0	0	0	0	0	0	0	0	0	0	0	0	0	0	0	0	0	0	0	0	0	0	0	0	0
ESV_431928	Eukaryota	Arthropoda	Insecta	Diptera	Cecidomyiidae			99	0	0	0	0	0	0	0	0	0	0	0	0	0	0	0	0	0	0	0	0	0	0	0	0	0	0	0	0	0	0	0	0	0	0	0	0	0	0	0	0	0
ESV_431929	Eukaryota	Arthropoda	Insecta	Diptera	Cecidomyiidae			95.8	0	0	0	0	0	0	0	0	0	0	0	0	0	0	0	0	0	0	0	0	0	0	0	0	0	0	0	0	0	0	0	0	0	0	0	0	0	0	0	0	0
ESV_431930	Eukaryota	Arthropoda	Insecta	Diptera	Cecidomyiidae			99.4	0	0	0	0	0	0	0	0	0	0	0	0	1	0	1	0	1	1	0	0	0	0	0	0	0	0	0	0	0	0	0	0	0	0	0	0	0	0	0	0	0
ESV_431932	Eukaryota	Arthropoda	Insecta	Diptera	Cecidomyiidae			97.8	0	0	0	0	0	0	0	0	0	0	0	0	0	0	0	0	0	0	0	0	0	0	0	0	0	0	0	0	0	0	0	0	0	0	0	0	0	0	0	0	0
ESV_431933	Eukaryota	Arthropoda	Insecta	Diptera	Cecidomyiidae			95.2	0	0	0	0	0	0	0	0	0	0	0	0	0	0	0	0	0	0	0	0	0	0	0	0	0	0	0	0	0	0	0	0	0	0	0	0	0	0	0	0	0
ESV_431934	Eukaryota	Arthropoda	Insecta	Diptera	Cecidomyiidae			94.2	0	0	0	0	0	0	0	0	0	0	0	0	0	0	0	0	0	0	0	0	0	0	0	0	0	0	0	0	0	0	0	0	0	0	0	0	0	0	0	0	0
ESV_431939	Eukaryota	Arthropoda	Insecta	Diptera	Cecidomyiidae			97.1	0	0	0	0	0	0	0	0	0	0	0	0	20	2	4	3	2	1	4	2	9	5	7	1	0	0	0	0	0	0	0	0	0	0	0	0	0	0	0	0	0
ESV_431944	Eukaryota	Arthropoda	Insecta	Diptera	Cecidomyiidae			98.1	0	0	0	1	0	0	0	0	0	0	0	0	48949	17064	11225	7831	5587	3429	8551	2205	3226	2155	2594	1439	1373	184	213	121	697	88	112	93	114	162	124	68	0	0	0	0	0
ESV_431945	Eukaryota	Arthropoda	Insecta	Diptera	Cecidomyiidae			99.4	0	0	0	0	0	0	0	0	0	0	0	0	0	0	0	0	0	0	0	0	0	0	0	0	0	0	0	0	0	0	0	0	0	0	0	0	0	0	0	0	0
ESV_431949	Eukaryota	Arthropoda	Insecta	Diptera	Cecidomyiidae			95.2	0	0	0	0	0	0	0	0	0	0	0	0	0	0	0	0	0	0	0	0	0	0	0	0	0	0	0	0	0	0	0	0	0	0	0	0	0	0	0	0	0
ESV_431951	Eukaryota	Arthropoda	Insecta	Diptera	Cecidomyiidae			93.9	0	0	0	0	0	0	0	0	0	0	0	0	0	0	0	0	0	0	0	0	0	0	0	0	0	0	0	0	0	0	0	0	0	0	0	0	0	0	0	0	0
ESV_431954	Eukaryota	Arthropoda	Insecta	Diptera	Cecidomyiidae			96.8	0	0	0	0	0	0	0	0	0	0	0	0	0	0	0	0	0	0	0	0	0	0	0	0	0	0	0	0	0	0	0	0	0	0	0	0	0	0	0	0	0
ESV_431955	Eukaryota	Arthropoda	Insecta	Diptera	Cecidomyiidae			93.9	0	0	0	0	0	0	0	0	0	0	0	0	0	0	0	0	0	0	0	0	0	0	0	0	0	0	0	0	0	0	0	0	0	0	0	0	0	0	0	0	0
ESV_431956	Eukaryota	Arthropoda	Insecta	Diptera	Cecidomyiidae			98.4	0	0	0	0	0	0	0	0	0	0	0	0	0	0	0	0	0	0	0	0	0	0	0	0	0	0	0	0	0	0	0	0	0	0	0	0	0	0	0	0	0
ESV_431957	Eukaryota	Arthropoda	Insecta	Diptera	Cecidomyiidae			98.7	0	0	0	0	0	0	0	0	0	0	0	0	0	0	0	0	0	0	0	0	0	0	0	0	0	0	0	0	0	0	0	0	0	0	0	0	0	0	0	0	0
ESV_431958	Eukaryota	Arthropoda	Insecta	Diptera	Cecidomyiidae			93.9	0	0	0	0	0	0	0	0	0	0	0	0	0	0	0	0	0	0	0	0	0	0	0	0	0	0	0	0	0	0	0	0	0	0	0	0	0	0	0	0	0
ESV_431959	Eukaryota	Arthropoda	Insecta	Lepidoptera	Gracillariidae	Caloptilia	Caloptilia hemiconis	95.2	0	0	0	0	0	0	0	0	0	0	0	0	0	0	0	0	0	0	0	0	0	0	0	0	0	0	0	0	0	0	0	0	0	0	0	0	0	0	0	0	0
ESV_431960	Eukaryota	Arthropoda	Insecta	Diptera	Cecidomyiidae			96.5	0	0	0	0	0	0	0	0	0	0	0	0	0	0	0	0	0	0	0	0	0	0	0	0	0	0	0	0	0	0	0	0	0	0	0	0	0	0	0	0	0
ESV_431961	Eukaryota	Arthropoda	Insecta	Diptera	Cecidomyiidae			94.6	0	0	0	0	0	0	0	0	0	0	0	0	0	0	0	0	0	0	0	0	0	0	0	0	0	0	0	0	0	0	0	0	0	0	0	0	0	0	0	0	0
ESV_431962	Eukaryota	Arthropoda	Insecta	Diptera	Cecidomyiidae			93.6	0	0	0	0	0	0	0	0	0	0	0	0	0	0	0	0	0	0	0	0	0	0	0	0	0	0	0	0	0	0	0	0	0	0	0	0	0	0	0	0	0
ESV_431963	Eukaryota	Arthropoda	Insecta	Diptera	Cecidomyiidae			95.2	0	0	0	0	0	0	0	0	0	0	0	0	0	0	0	0	0	0	0	0	0	0	0	0	0	0	0	0	0	0	0	0	0	0	0	0	0	0	0	0	0
ESV_431970	Eukaryota	Arthropoda	Insecta	Lepidoptera	Gracillariidae	Caloptilia	Caloptilia hemiconis	95.2	0	0	0	0	0	0	0	0	0	0	0	0	0	0	0	0	0	0	0	0	0	0	0	0	0	0	0	0	0	0	0	0	0	0	0	0	0	0	0	0	0
ESV_431972	Eukaryota	Arthropoda	Insecta	Diptera	Cecidomyiidae			97.1	0	0	0	0	0	0	0	0	0	0	0	0	0	0	0	0	0	0	0	0	0	0	0	0	0	0	0	0	0	0	0	0	0	0	0	0	0	0	0	0	0
ESV_431973	Eukaryota	Arthropoda	Insecta	Diptera	Cecidomyiidae			97.1	0	0	0	0	0	0	0	0	0	0	0	0	0	0	0	0	0	0	0	0	0	0	0	0	0	0	0	0	0	0	0	0	0	0	0	0	0	0	0	0	0
ESV_431979	Eukaryota	Arthropoda	Insecta	Diptera	Cecidomyiidae			100	0	0	0	0	0	0	0	0	0	0	0	0	0	0	0	0	0	0	0	0	0	0	0	0	0	0	0	0	0	0	0	0	0	0	0	0	0	0	0	0	0
ESV_431984	Eukaryota	Arthropoda	Insecta	Diptera	Cecidomyiidae			95.2	0	0	0	0	0	0	0	0	0	0	0	0	0	0	0	0	0	0	0	0	0	0	0	0	0	0	0	0	0	0	0	0	0	0	0	0	0	0	0	0	0
ESV_431986	Eukaryota	Arthropoda	Insecta	Diptera	Cecidomyiidae			95.8	0	0	0	0	0	0	0	0	0	0	0	0	0	0	0	0	0	0	0	0	0	0	0	0	0	0	0	0	0	0	0	0	0	0	0	0	0	0	0	0	0
ESV_431992	Eukaryota	Arthropoda	Insecta	Diptera	Cecidomyiidae			99	0	0	0	0	0	0	0	0	0	0	0	0	0	0	0	0	0	0	0	0	0	0	0	0	0	0	0	0	0	0	0	0	0	0	0	0	0	0	0	0	0
ESV_432000	Eukaryota	Arthropoda	Insecta	Diptera	Cecidomyiidae			94.9	0	0	0	0	0	0	0	0	0	0	0	0	0	0	0	0	0	0	0	0	0	0	0	0	0	0	0	0	0	0	0	0	0	0	0	0	0	0	0	0	0
ESV_432001	Eukaryota	Arthropoda	Insecta					95.2	0	0	0	0	0	0	0	0	0	0	0	0	0	0	0	0	0	0	0	0	0	0	0	0	0	0	0	0	0	0	0	0	0	0	0	0	0	0	0	0	0
ESV_432006	Eukaryota	Arthropoda	Insecta	Diptera	Cecidomyiidae			97.8	0	0	0	0	0	0	0	0	0	0	0	0	0	0	0	0	0	0	0	0	0	0	0	0	0	0	0	0	0	0	0	0	0	0	0	0	0	0	0	0	0
ESV_432015	Eukaryota	Arthropoda	Insecta	Diptera	Cecidomyiidae			93	0	0	0	0	0	0	0	0	0	0	0	0	0	0	0	0	0	0	0	0	0	0	0	0	0	0	0	0	0	0	0	0	0	0	0	0	0	0	0	0	0
ESV_432018	Eukaryota	Arthropoda	Insecta	Diptera	Cecidomyiidae			97.8	0	0	0	0	0	0	0	0	0	0	0	0	0	0	0	0	0	0	0	0	0	0	0	0	0	0	0	0	0	0	0	0	0	0	0	0	0	0	0	0	0
ESV_432019	Eukaryota	Arthropoda	Insecta	Diptera	Cecidomyiidae			92.3	0	0	0	0	0	0	0	0	0	0	0	0	0	0	0	0	0	0	0	0	0	0	0	0	0	0	0	0	0	0	0	0	0	0	0	0	0	0	0	0	0
ESV_432020	Eukaryota	Arthropoda	Insecta	Diptera	Cecidomyiidae			97.1	0	0	0	0	0	0	0	0	0	0	0	0	0	0	0	0	0	0	0	0	0	0	0	0	0	0	0	0	0	0	0	0	0	0	0	0	0	0	0	0	0
ESV_432022	Eukaryota	Arthropoda	Insecta	Diptera	Cecidomyiidae			95.2	0	0	0	0	0	0	0	0	0	0	0	0	0	0	0	0	0	0	0	0	0	0	0	0	0	0	0	0	0	0	0	0	0	0	0	0	0	0	0	0	0
ESV_432023	Eukaryota	Arthropoda	Insecta	Diptera	Cecidomyiidae			95.5	0	0	0	0	0	0	0	0	0	0	0	0	0	0	0	0	0	0	0	0	0	0	0	0	0	0	0	0	0	0	0	0	0	0	0	0	0	0	0	0	0
ESV_432026	Eukaryota	Arthropoda	Insecta	Diptera	Cecidomyiidae			96.8	0	0	0	0	0	0	0	0	0	0	0	0	0	0	0	0	0	0	0	0	0	0	0	0	0	0	0	0	0	0	0	0	0	0	0	0	0	0	0	0	0
ESV_432027	Eukaryota	Arthropoda	Insecta	Diptera	Cecidomyiidae			94.2	0	0	0	0	0	0	0	0	0	0	0	0	0	0	0	0	0	0	0	0	0	0	0	0	0	0	0	0	0	0	0	0	0	0	0	0	0	0	0	0	0
ESV_432041	Eukaryota	Arthropoda	Insecta	Diptera	Cecidomyiidae			93.9	0	0	0	0	0	0	0	0	0	0	0	0	0	0	0	0	0	0	0	0	0	0	0	0	0	0	0	0	0	0	0	0	0	0	0	0	0	0	0	0	0
ESV_432051	Eukaryota	Arthropoda	Insecta	Lepidoptera	Thyrididae			86.3	0	0	0	0	0	0	0	0	0	0	0	0	0	0	0	0	0	0	0	0	0	0	0	0	0	0	0	0	0	0	0	0	0	0	0	0	0	0	0	0	0
ESV_432054	Eukaryota	Arthropoda	Insecta	Diptera	Cecidomyiidae			96.5	0	0	0	0	0	0	0	0	0	0	0	0	0	0	0	0	0	0	0	0	0	0	0	0	0	0	0	0	0	0	0	0	0	0	0	0	0	0	0	0	0
ESV_432057	Eukaryota	Arthropoda	Insecta	Diptera	Cecidomyiidae			94.2	0	0	0	0	0	0	0	0	0	0	0	0	0	0	0	0	0	0	0	0	0	0	0	0	0	0	0	0	0	0	0	0	0	0	0	0	0	0	0	0	0
ESV_432059	Eukaryota	Arthropoda	Insecta	Diptera	Cecidomyiidae			95.2	0	0	0	0	0	0	0	0	0	0	0	0	0	0	0	0	0	0	0	0	0	0	0	0	0	0	0	0	0	0	0	0	0	0	0	0	0	0	0	0	0
ESV_432061	Eukaryota	Arthropoda	Insecta	Diptera	Cecidomyiidae			99	0	0	0	0	0	0	0	0	0	0	0	0	0	0	0	0	0	0	0	0	0	0	0	0	0	0	0	0	0	0	0	0	0	0	0	0	0	0	0	0	0
ESV_432062	Eukaryota	Arthropoda	Insecta	Diptera	Cecidomyiidae			96.2	0	0	0	0	0	0	0	0	0	0	0	0	0	0	0	0	0	0	0	0	0	0	0	0	0	0	0	0	0	0	0	0	0	0	0	0	0	0	0	0	0
ESV_432064	Eukaryota	Arthropoda	Insecta	Diptera	Cecidomyiidae			97.1	0	0	0	0	0	0	0	0	0	0	0	0	0	0	0	0	0	0	0	0	243	0	0	0	0	0	0	0	0	0	0	0	0	0	0	0	0	0	0	0	0
ESV_432065	Eukaryota	Arthropoda	Insecta	Diptera	Cecidomyiidae			93.6	0	0	0	0	0	0	0	0	0	0	0	0	0	0	0	0	0	0	0	0	0	0	0	0	0	0	0	0	0	0	0	0	0	0	0	0	0	0	0	0	0
ESV_432066	Eukaryota	Arthropoda	Insecta	Diptera	Cecidomyiidae			95.2	0	0	0	0	0	0	0	0	0	0	0	0	0	0	0	0	0	0	0	0	0	0	0	0	0	0	0	0	0	0	0	0	0	0	0	0	0	0	0	0	0
ESV_432069	Eukaryota	Arthropoda	Insecta	Diptera	Cecidomyiidae			92	0	0	0	0	0	0	0	0	0	0	0	0	0	0	0	0	0	0	0	0	0	0	0	0	0	0	0	0	0	0	0	0	0	0	0	0	0	0	0	0	0
ESV_432072	Eukaryota	Arthropoda	Insecta	Diptera	Cecidomyiidae			95.5	0	0	0	0	0	0	0	0	0	0	0	0	0	0	0	0	0	0	0	0	0	0	0	0	0	0	0	0	0	0	0	0	0	0	0	0	0	0	0	0	0
ESV_432075	Eukaryota	Arthropoda	Insecta	Diptera	Cecidomyiidae			97.4	0	0	0	0	1	1	0	0	0	0	0	0	0	0	0	0	0	0	0	0	0	0	0	0	0	0	0	0	0	0	0	0	0	0	0	0	0	0	0	0	0
ESV_432080	Eukaryota	Arthropoda	Insecta	Diptera	Cecidomyiidae			97.8	0	0	0	0	0	0	0	0	0	0	0	0	0	0	0	0	0	0	0	0	0	0	0	0	0	0	0	0	0	0	0	0	0	0	0	0	0	0	0	0	0
ESV_432084	Eukaryota	Arthropoda	Insecta	Diptera	Cecidomyiidae			99	0	0	0	0	0	0	0	0	0	0	0	0	0	0	0	0	0	0	0	0	0	0	0	0	0	0	0	0	0	0	0	0	0	0	0	0	0	0	0	0	0
ESV_432089	Eukaryota	Arthropoda	Insecta	Lepidoptera	Hesperiidae	Erynnis	Erynnis baptisiae	93.6	0	0	0	0	0	0	0	0	0	0	0	0	0	0	0	0	0	0	0	0	0	0	0	0	0	0	0	0	0	0	0	0	0	0	0	0	0	0	0	0	0
ESV_432092	Eukaryota	Arthropoda	Insecta	Diptera	Cecidomyiidae			92.7	0	0	0	0	0	0	0	0	0	0	0	0	0	0	0	0	0	0	0	0	0	0	0	0	0	0	0	0	0	0	0	0	0	0	0	0	0	0	0	0	0
ESV_432093	Eukaryota	Arthropoda	Insecta	Diptera	Cecidomyiidae			93.9	0	0	0	0	0	0	0	0	0	0	0	0	0	0	0	0	0	0	0	0	0	0	0	0	0	4	0	0	1	1	1	0	7	1	0	0	0	0	0	0	0
ESV_432107	Eukaryota	Arthropoda	Insecta	Diptera	Cecidomyiidae			100	0	0	0	0	0	0	0	0	0	0	0	0	0	0	0	0	0	0	0	0	0	0	0	0	0	0	0	0	0	0	0	0	0	0	0	0	0	0	0	0	0
ESV_432108	Eukaryota	Arthropoda	Insecta	Diptera	Cecidomyiidae			92.7	0	0	0	0	0	0	0	0	0	0	0	0	0	0	0	0	0	0	0	0	0	0	0	0	0	0	0	0	0	0	0	0	0	0	0	0	0	0	0	0	0
ESV_432110	Eukaryota	Arthropoda	Insecta	Diptera	Cecidomyiidae			91.7	0	0	0	0	0	0	0	0	0	0	0	0	0	0	0	0	0	0	0	0	0	0	0	0	0	0	0	0	0	0	0	0	0	0	0	0	0	0	0	0	0
ESV_432111	Eukaryota	Arthropoda	Insecta	Diptera	Cecidomyiidae			95.5	0	0	0	0	0	0	0	0	0	0	0	0	0	0	0	0	0	0	0	0	0	0	0	0	0	0	0	0	0	0	0	0	0	0	0	0	0	0	0	0	0
ESV_432122	Eukaryota	Arthropoda	Insecta	Diptera	Cecidomyiidae			95.5	0	0	0	0	0	0	0	0	0	0	0	0	0	0	0	0	0	0	0	0	0	0	0	0	0	0	0	0	0	0	0	0	0	0	0	0	0	0	0	0	0
ESV_432125	Eukaryota	Arthropoda	Insecta	Diptera	Cecidomyiidae			93.6	0	0	0	0	0	0	0	0	0	0	0	0	0	0	0	0	0	0	0	0	0	0	0	0	0	0	0	0	0	0	0	0	0	0	0	0	0	0	0	0	0
ESV_432126	Eukaryota	Arthropoda	Insecta	Diptera	Cecidomyiidae			94.2	0	0	0	0	0	0	0	0	0	0	0	0	0	0	0	0	0	0	0	0	0	0	0	0	0	0	0	0	0	0	0	0	0	0	0	0	0	0	0	0	0
ESV_432127	Eukaryota	Arthropoda	Insecta	Diptera	Cecidomyiidae			93.6	0	0	0	0	0	0	0	0	0	0	0	0	0	0	0	0	0	0	0	0	0	0	0	0	0	0	0	0	0	0	0	0	0	0	0	0	0	0	0	0	0
ESV_432129	Eukaryota	Arthropoda	Insecta	Diptera	Cecidomyiidae			94.2	0	0	0	0	0	0	0	0	0	0	0	0	0	0	0	0	0	0	0	0	0	0	0	0	0	0	0	0	0	0	0	0	0	0	0	0	0	0	0	0	0
ESV_432131	Eukaryota	Arthropoda	Insecta	Diptera	Cecidomyiidae			99.7	0	0	0	0	0	0	0	0	0	0	0	0	0	0	0	0	0	0	0	0	0	0	0	0	0	0	0	0	0	0	0	0	0	0	0	0	0	0	0	0	0
ESV_432133	Eukaryota	Arthropoda	Insecta	Diptera	Cecidomyiidae			96.8	0	0	0	0	0	0	0	0	0	0	0	0	0	0	0	0	0	0	0	0	0	0	0	0	0	0	0	0	0	0	0	0	0	0	0	0	0	0	0	0	0
ESV_432134	Eukaryota	Arthropoda	Insecta	Diptera	Cecidomyiidae			93.3	0	0	0	0	0	0	0	0	0	0	0	0	0	0	0	0	0	0	0	0	0	0	0	0	0	0	0	0	0	0	0	0	0	0	0	0	0	0	0	0	0
ESV_432135	Eukaryota	Arthropoda	Insecta	Hymenoptera				96.8	2566	264	217	200	213	319	292	217	330	365	259	307	0	0	0	0	0	0	0	0	0	0	0	0	84	105	110	93	78	61	94	90	117	128	90	97	0	0	0	0	0
ESV_432138	Eukaryota	Arthropoda	Insecta	Diptera	Cecidomyiidae			93.9	0	0	0	0	0	0	0	0	0	0	0	0	0	0	0	0	0	0	0	0	0	0	0	0	0	0	0	0	0	0	0	0	0	0	0	0	0	0	0	0	0
ESV_432141	Eukaryota	Arthropoda	Insecta	Diptera	Cecidomyiidae			96.8	0	0	0	0	0	0	0	0	0	0	0	0	0	0	0	0	0	0	0	0	0	0	0	0	0	0	0	0	0	0	0	0	0	0	0	0	0	0	0	0	0
ESV_432144	Eukaryota	Arthropoda	Insecta	Diptera	Cecidomyiidae			93.9	0	0	0	0	0	0	0	0	0	0	0	0	0	0	0	0	0	0	0	0	0	0	0	0	0	0	0	0	0	0	0	0	0	0	0	0	0	0	0	0	0
ESV_432150	Eukaryota	Arthropoda	Insecta	Diptera	Cecidomyiidae			96.2	0	0	0	0	0	0	0	0	0	0	0	0	0	0	0	0	0	0	0	0	0	0	0	0	0	0	0	0	0	0	0	0	0	0	0	0	0	0	0	0	0
ESV_432170	Eukaryota	Arthropoda	Insecta	Diptera	Cecidomyiidae			99.7	0	0	0	0	0	0	0	0	0	0	0	0	0	0	0	0	0	0	0	0	0	0	0	0	0	0	0	0	0	0	0	0	0	0	0	0	0	0	0	0	0
ESV_432172	Eukaryota	Arthropoda	Insecta	Diptera	Cecidomyiidae			93.9	0	0	0	0	0	0	0	0	0	0	0	0	0	0	0	0	0	0	0	0	0	0	0	0	0	0	0	0	0	0	0	0	0	0	0	0	0	0	0	0	0
ESV_432175	Eukaryota	Arthropoda	Insecta	Diptera	Cecidomyiidae			93	0	0	0	0	0	0	0	0	0	0	0	0	0	0	0	0	0	0	0	0	0	0	0	0	0	0	0	0	0	0	0	0	0	0	0	0	0	0	0	0	0
ESV_432184	Eukaryota	Arthropoda	Insecta	Diptera	Cecidomyiidae			93	0	0	0	0	0	0	0	0	0	0	0	0	0	0	0	0	0	0	0	0	0	0	0	0	0	0	0	0	0	0	0	0	0	0	0	0	0	0	0	0	0
ESV_432186	Eukaryota	Arthropoda	Insecta	Diptera	Cecidomyiidae			92.3	0	0	0	0	0	0	0	0	0	0	0	0	0	0	0	0	0	0	0	0	0	0	0	0	0	0	0	0	0	0	0	0	0	0	0	0	0	0	0	0	0
ESV_432212	Eukaryota	Arthropoda	Insecta	Diptera	Cecidomyiidae			99.4	0	0	0	0	0	0	0	0	0	0	0	0	0	0	0	0	0	0	0	0	0	0	0	0	0	0	0	0	0	0	0	0	0	0	0	0	0	0	0	0	0
ESV_432213	Eukaryota	Arthropoda	Insecta	Diptera	Cecidomyiidae			99	0	0	0	0	0	0	0	0	0	0	0	0	0	0	0	0	0	0	0	0	0	0	0	0	0	0	0	0	0	0	0	0	0	0	0	0	0	0	0	0	0
ESV_432217	Eukaryota	Arthropoda	Insecta					96.5	0	0	0	0	0	0	0	0	0	0	0	0	0	0	0	0	0	0	0	0	0	0	0	0	0	0	0	0	0	0	0	0	0	0	0	0	0	0	0	0	0
ESV_432218	Eukaryota	Arthropoda	Insecta	Lepidoptera				96.2	0	0	0	0	0	0	0	0	0	0	0	0	0	0	0	0	0	0	0	0	0	0	0	0	0	0	0	0	0	0	0	0	0	0	0	0	0	0	0	0	0
ESV_432225	Eukaryota	Arthropoda	Insecta	Diptera	Cecidomyiidae			92.3	0	0	0	0	0	0	0	0	0	0	0	0	0	0	0	0	0	0	0	0	0	0	0	0	0	0	0	0	0	0	0	0	0	0	0	0	0	0	0	0	0
ESV_432234	Eukaryota	Arthropoda	Insecta	Diptera	Cecidomyiidae			96.5	0	0	0	0	0	0	0	0	0	0	0	0	0	0	0	0	0	0	0	0	0	0	0	0	0	0	0	0	0	0	0	0	0	0	0	0	0	0	0	0	0
ESV_432241	Eukaryota	Arthropoda	Insecta	Diptera	Cecidomyiidae			99.7	0	0	0	0	0	0	0	0	0	0	0	0	0	0	0	0	0	0	0	0	0	0	0	0	0	0	0	0	0	0	0	0	0	0	0	0	0	0	0	0	0
ESV_432249	Eukaryota	Arthropoda	Insecta	Diptera	Cecidomyiidae			92.7	0	0	0	0	0	0	0	0	0	0	0	0	0	0	0	0	0	0	0	0	0	0	0	0	0	0	0	0	0	0	0	0	1	0	0	0	0	0	0	0	0
ESV_432255	Eukaryota	Arthropoda	Insecta	Diptera	Cecidomyiidae			91.7	0	0	0	0	0	0	0	0	0	0	0	0	0	0	0	0	0	0	0	0	0	0	0	0	0	0	0	0	0	0	0	0	0	0	0	0	0	0	0	0	0
ESV_432258	Eukaryota	Arthropoda	Insecta	Lepidoptera	Cosmopterigidae	Anatrachyntis	Anatrachyntis rileyi	95.2	0	0	0	0	0	0	0	0	0	0	0	0	0	0	0	0	0	0	0	0	1	0	0	0	0	0	0	0	0	0	0	0	0	0	0	0	0	0	0	0	0
ESV_432445	Eukaryota	Arthropoda	Insecta	Diptera	Cecidomyiidae			93.9	0	0	0	0	0	0	0	0	0	0	0	0	0	0	0	0	0	0	0	0	0	0	0	0	0	0	0	0	0	0	0	0	0	0	0	0	0	0	0	0	0
ESV_432448	Eukaryota	Arthropoda	Insecta	Diptera	Cecidomyiidae			94.2	0	0	0	0	0	0	0	0	0	0	0	0	0	0	0	0	0	0	0	0	0	0	0	0	0	0	0	0	0	0	0	0	0	0	0	0	0	0	0	0	0
ESV_432465	Eukaryota	Arthropoda	Insecta	Diptera	Psychodidae			96.2	21	2	3	3	5	3	5	4	8	4	3	7	0	0	0	0	0	0	0	0	0	0	0	0	0	0	0	0	0	0	0	0	0	0	0	0	0	0	0	0	0
ESV_432467	Eukaryota	Arthropoda	Insecta	Diptera				91.1	19	11	4	2	3	10	5	11	6	8	4	12	0	0	0	0	0	0	0	0	0	0	0	0	0	0	0	0	0	0	0	0	0	0	0	0	0	0	0	0	0
ESV_432477	Eukaryota	Arthropoda	Insecta	Diptera	Cecidomyiidae			96.2	0	0	0	0	0	0	0	0	0	0	0	0	81	22	38	22	20	19	17	23	16	19	20	17	0	0	0	0	0	0	0	0	0	0	0	0	0	0	0	0	0
ESV_432503	Eukaryota	Arthropoda	Insecta	Diptera	Cecidomyiidae			96.2	0	0	0	0	0	0	0	0	0	0	0	0	0	0	0	0	0	0	0	0	0	0	0	0	97	29	21	13	11	8	8	10	14	20	14	12	0	0	0	0	0
ESV_432521	Eukaryota	Arthropoda	Insecta	Diptera	Cecidomyiidae			99.4	0	0	0	0	0	0	0	0	0	0	0	0	0	0	0	0	0	0	0	0	0	0	0	0	20	3	6	2	1	1	4	2	3	7	5	2	0	0	0	0	0
ESV_432574	Eukaryota	Arthropoda	Insecta	Diptera	Cecidomyiidae			95.5	0	0	0	0	0	0	0	0	0	0	0	0	0	0	0	0	0	0	0	0	0	0	0	0	0	0	0	0	0	0	0	0	0	0	0	0	0	0	0	0	0
ESV_432587	Eukaryota	Arthropoda	Insecta	Lepidoptera	Tineidae	Edosa	Edosa nr. cymopelta	85.3	0	0	0	0	0	0	0	0	0	0	0	0	0	0	0	0	0	0	0	0	0	0	0	0	0	0	0	0	0	0	0	0	0	0	0	0	0	0	0	0	0
ESV_432589	Eukaryota	Arthropoda	Insecta	Diptera	Cecidomyiidae			94.6	0	0	0	0	0	0	0	0	0	0	0	0	0	0	0	0	0	0	0	0	0	0	0	0	0	0	0	0	0	0	0	0	0	0	0	0	0	0	0	0	0
ESV_432591	Eukaryota	Arthropoda	Insecta	Diptera	Cecidomyiidae			93.9	0	0	0	0	0	0	0	0	0	0	0	0	0	0	0	0	0	0	0	0	0	0	0	0	0	0	0	0	0	0	0	0	0	0	0	0	0	0	0	0	0
ESV_432619	Eukaryota	Arthropoda	Insecta	Diptera	Cecidomyiidae			93.9	0	0	0	0	0	0	0	0	0	0	0	0	0	0	0	0	0	0	0	0	0	0	0	0	0	0	0	0	0	0	0	0	0	0	0	0	0	0	0	0	0
ESV_432715	Eukaryota	Arthropoda	Insecta	Coleoptera	Curculionidae	Curculio	Curculio sp. 2 ZM-2022a	91	0	2	0	0	0	77	1	0	0	0	1	0	0	0	0	1	0	0	2	0	0	0	0	2	2	0	0	0	2	0	0	0	0	1	0	1	2	0	0	2	3
ESV_432777	Eukaryota	Arthropoda	Insecta	Diptera	Cecidomyiidae			93.3	0	0	0	0	0	0	0	0	0	0	0	0	0	0	0	0	0	0	0	0	0	0	0	0	0	0	0	0	0	0	0	0	0	0	0	0	0	0	0	0	0
ESV_432805	Eukaryota	Arthropoda	Insecta	Diptera	Cecidomyiidae			95.2	0	0	0	0	0	0	0	0	0	0	0	0	0	0	0	0	0	0	0	0	0	0	0	0	0	0	0	0	0	0	0	0	0	0	0	0	0	0	0	0	0
ESV_432830	Eukaryota	Arthropoda	Insecta	Diptera	Cecidomyiidae			92.7	0	0	0	0	0	0	0	0	0	0	0	0	0	0	0	0	0	0	0	0	0	0	0	0	0	0	0	0	0	0	0	0	0	0	0	0	0	0	0	0	0
ESV_432839	Eukaryota	Arthropoda	Insecta	Diptera	Cecidomyiidae			95.2	0	0	0	0	0	0	0	0	0	0	0	0	0	0	0	0	0	0	0	0	0	0	0	0	0	0	0	0	0	0	0	0	0	0	0	0	0	0	0	0	0
ESV_432866	Eukaryota	Arthropoda	Insecta	Diptera	Cecidomyiidae			97.8	0	0	0	0	0	0	0	0	0	0	0	0	0	0	0	0	0	0	0	0	0	0	0	0	0	0	0	0	0	0	0	0	0	0	0	0	0	0	0	0	0
ESV_432870	Eukaryota	Arthropoda	Insecta	Diptera				99.7	0	0	0	0	0	0	0	0	0	0	0	0	0	0	0	0	0	0	0	0	0	0	0	0	0	0	0	0	0	0	0	0	0	0	0	0	0	0	0	0	0
ESV_432871	Eukaryota	Arthropoda	Insecta	Diptera	Cecidomyiidae			96.5	0	0	0	0	0	0	0	0	0	0	0	0	0	0	0	0	0	0	0	0	0	0	0	0	0	0	0	0	0	0	0	0	0	0	0	0	0	0	0	0	0
ESV_432884	Eukaryota	Arthropoda	Insecta	Diptera				96.2	0	0	0	0	0	0	0	0	0	0	0	0	0	0	0	0	0	0	0	0	0	0	0	0	0	0	0	0	0	0	0	0	0	0	0	0	0	0	0	0	0
ESV_432892	Eukaryota	Arthropoda	Insecta	Diptera	Cecidomyiidae			92.3	0	0	0	0	0	0	0	0	0	0	0	0	0	0	0	0	0	0	1	0	0	0	0	0	0	0	0	0	0	0	0	0	0	0	0	0	0	0	0	0	0
ESV_432898	Eukaryota	Arthropoda	Insecta					96.5	0	0	0	0	0	0	0	0	0	0	0	0	0	0	0	0	0	0	0	0	0	0	0	0	0	0	0	0	0	0	0	0	0	0	0	0	0	0	0	0	0
ESV_432901	Eukaryota	Arthropoda	Insecta	Diptera	Cecidomyiidae			93.3	0	0	0	0	0	0	0	0	0	0	0	0	0	0	0	0	0	0	0	0	0	0	0	0	0	0	0	0	0	0	0	0	0	0	0	0	0	0	0	0	0
ESV_432938	Eukaryota	Arthropoda	Insecta	Lepidoptera	Pyralidae	Cactoblastis	Cactoblastis doddi	95.2	0	0	0	0	0	0	0	0	0	0	0	0	0	0	0	0	0	0	0	0	0	0	0	0	0	0	0	0	0	0	0	0	0	0	0	0	0	0	0	0	0
ESV_432950	Eukaryota	Arthropoda	Insecta	Diptera	Psychodidae	Trichomyia		100	0	0	0	0	0	0	0	0	0	0	0	0	0	0	0	0	0	0	0	0	0	0	0	0	0	0	0	0	0	0	0	0	0	0	0	0	0	0	0	0	0
ESV_432966	Eukaryota	Arthropoda	Insecta	Diptera	Cecidomyiidae			93.3	0	0	0	0	0	0	0	0	0	0	0	0	0	0	0	0	0	0	0	0	0	0	0	0	0	0	0	0	0	0	0	0	0	0	0	0	0	0	0	0	0
ESV_432977	Eukaryota	Arthropoda	Insecta	Hymenoptera	Eupelmidae	Balcha	Balcha indica	97.1	0	0	0	0	0	0	0	0	0	0	0	0	0	0	0	0	0	0	0	0	0	0	0	0	0	0	0	0	0	0	0	0	0	0	0	0	0	0	0	0	0
ESV_432991	Eukaryota	Arthropoda	Insecta	Diptera	Cecidomyiidae			96.5	0	0	0	0	0	0	0	0	0	0	0	0	0	0	0	0	0	0	0	0	0	0	0	0	0	0	0	0	0	0	0	0	0	0	0	0	0	0	0	0	0
ESV_433008	Eukaryota	Arthropoda	Insecta	Diptera	Cecidomyiidae			92.1	0	0	0	0	0	0	0	0	0	0	0	0	0	0	0	0	0	0	0	0	0	0	0	0	0	0	0	0	0	0	0	0	0	0	0	0	0	0	0	0	0
ESV_433013	Eukaryota	Arthropoda	Arachnida	Sarcoptiformes				85.3	0	0	0	0	0	0	0	0	0	0	0	0	0	0	0	0	0	0	0	0	0	0	0	0	0	0	0	0	0	0	0	0	0	0	0	0	0	0	0	0	0
ESV_433014	Eukaryota	Arthropoda	Insecta	Diptera	Cecidomyiidae			93.3	0	0	0	0	0	0	0	0	0	0	0	0	0	0	0	0	0	0	0	0	0	0	0	0	0	0	0	0	0	0	0	0	0	0	0	0	0	0	0	0	0
ESV_433015	Eukaryota	Arthropoda	Insecta	Diptera	Cecidomyiidae			96.2	0	0	0	0	0	0	0	0	0	0	0	0	0	0	0	0	0	0	0	0	0	0	0	0	0	0	0	0	0	0	0	0	0	0	0	0	0	0	0	0	0
ESV_433047	Eukaryota	Arthropoda	Insecta	Diptera	Cecidomyiidae			93.9	0	0	0	0	0	0	0	0	0	0	0	0	0	0	0	0	0	0	0	0	0	0	0	0	0	0	0	0	0	0	0	0	0	0	0	0	0	0	0	0	0
ESV_433055	Eukaryota	Arthropoda	Insecta	Diptera	Cecidomyiidae			99.7	0	0	0	0	0	0	0	0	0	0	0	0	0	0	0	0	0	0	0	0	0	0	0	0	0	0	0	0	0	0	0	0	0	0	0	0	0	0	0	0	0
ESV_433064	Eukaryota	Arthropoda	Insecta					92	0	0	0	0	0	0	0	0	0	0	0	0	0	0	0	0	0	0	0	0	0	0	0	0	0	0	0	0	0	0	0	0	0	0	0	0	0	0	0	0	0
ESV_433081	Eukaryota	Arthropoda	Insecta	Lepidoptera	Hesperiidae	Polites	Polites themistocles	95.3	1	0	0	0	0	0	1	1	0	0	0	0	0	0	0	0	0	0	0	0	0	0	0	0	0	0	0	0	0	0	0	0	0	0	0	0	0	0	0	0	0
ESV_433089	Eukaryota	Arthropoda	Insecta	Diptera	Cecidomyiidae			92	0	0	0	0	0	0	0	0	0	0	0	0	0	0	0	0	0	0	0	0	0	0	0	0	0	0	0	0	0	0	0	0	0	0	0	0	0	0	0	0	0
ESV_433092	Eukaryota	Arthropoda	Insecta	Diptera	Cecidomyiidae			93.9	0	0	0	0	0	0	0	0	0	0	0	0	0	0	0	0	0	0	0	0	0	0	0	0	0	0	0	0	0	0	0	0	0	0	0	0	0	0	0	0	0
ESV_433099	Eukaryota	Arthropoda	Insecta	Diptera	Cecidomyiidae			93	0	0	0	0	0	0	0	0	0	0	0	0	0	0	0	0	0	0	0	0	0	0	0	0	0	0	0	0	0	0	0	0	0	0	0	0	0	0	0	0	0
ESV_433168	Eukaryota	Arthropoda	Insecta	Hymenoptera	Formicidae	Iridomyrmex		87.5	0	0	0	0	0	0	0	0	0	0	0	0	0	0	0	0	0	0	0	0	0	0	0	0	0	0	0	0	0	0	0	0	0	0	0	0	0	0	0	0	0
ESV_433177	Eukaryota	Arthropoda	Insecta	Diptera	Cecidomyiidae			92.3	0	0	0	0	0	0	0	0	0	0	0	0	0	0	0	0	0	0	0	0	0	0	0	0	0	0	0	0	0	0	0	0	0	0	0	0	0	0	0	0	0
ESV_433191	Eukaryota	Arthropoda	Insecta	Lepidoptera	Nymphalidae	Splendeuptychia	Splendeuptychia kendalli	97.8	0	0	0	0	0	0	0	0	0	0	0	0	0	0	0	0	0	0	0	0	0	0	0	0	0	0	0	0	0	0	0	0	0	0	0	0	0	0	0	0	0
ESV_433199	Eukaryota	Arthropoda	Insecta	Diptera	Cecidomyiidae			94.6	0	0	0	0	0	0	0	0	0	0	0	0	0	0	0	0	0	0	0	0	0	0	0	0	0	0	0	0	0	0	0	0	0	0	0	0	0	0	0	0	0
ESV_433212	Eukaryota	Arthropoda	Insecta	Diptera	Cecidomyiidae			95.8	0	0	0	0	0	0	0	0	0	0	0	0	0	0	0	0	0	0	0	0	0	1	0	0	0	0	0	0	0	0	0	0	0	0	0	0	0	0	0	0	0
ESV_433221	Eukaryota	Arthropoda	Insecta	Diptera	Cecidomyiidae			93.6	0	0	0	0	0	0	0	0	0	0	0	0	0	0	0	0	0	0	0	0	0	0	0	0	0	0	0	0	0	0	0	0	0	0	0	0	0	0	0	0	0
ESV_433242	Eukaryota	Arthropoda	Insecta	Diptera	Cecidomyiidae			96.5	0	0	0	0	0	0	0	0	0	0	0	0	0	0	0	0	0	0	0	0	0	0	0	0	0	0	0	0	0	0	0	0	0	0	0	0	0	0	0	0	0
ESV_433255	Eukaryota	Arthropoda	Insecta	Diptera	Cecidomyiidae			93.6	0	0	0	0	0	0	0	0	0	0	0	0	0	0	0	0	0	0	0	0	0	0	0	0	0	0	0	0	0	0	0	0	0	0	0	0	0	0	0	0	0
ESV_433257	Eukaryota	Arthropoda	Insecta	Diptera	Cecidomyiidae			96.2	0	0	0	0	0	0	0	0	0	0	0	0	0	0	0	0	0	0	0	0	0	0	0	0	0	0	0	0	0	0	0	0	0	0	0	0	0	0	0	0	0
ESV_433261	Eukaryota	Arthropoda	Insecta	Hymenoptera	Mymaridae			94.5	0	0	0	0	0	0	0	0	0	0	0	0	0	0	0	0	0	0	0	0	0	1	0	0	0	0	0	0	0	0	0	0	0	0	0	0	0	0	0	0	0
ESV_433277	Eukaryota	Arthropoda	Insecta	Lepidoptera	Pyralidae	Coptarthria	Coptarthria dasypyga	93.6	0	0	0	0	0	0	0	0	0	0	0	0	0	0	0	0	0	0	0	0	0	0	0	0	0	0	0	0	0	0	0	0	0	0	0	0	0	0	0	0	0
ESV_433284	Eukaryota	Arthropoda	Insecta	Diptera	Cecidomyiidae			94.6	0	0	0	0	0	0	0	0	0	0	0	0	0	0	0	0	0	0	0	0	0	0	0	0	0	0	0	0	0	0	0	0	0	0	0	0	0	0	0	0	0
ESV_433291	Eukaryota	Arthropoda	Insecta	Diptera	Cecidomyiidae	Prodiplosis	Prodiplosis longifila	95.5	0	0	0	0	0	0	0	0	0	0	0	0	0	0	0	0	0	0	0	0	0	0	0	0	0	0	0	0	0	0	0	0	0	0	0	0	0	0	0	0	0
ESV_433309	Eukaryota	Arthropoda	Insecta	Diptera	Cecidomyiidae			93.3	0	0	0	0	0	0	0	0	0	0	0	0	0	0	0	0	0	0	0	0	0	0	0	0	0	0	0	0	0	0	0	0	0	0	0	0	0	0	0	0	0
ESV_433311	Eukaryota	Arthropoda	Insecta					95.2	0	0	0	0	0	0	0	0	0	0	0	0	0	0	0	0	0	0	0	0	0	0	0	0	0	0	0	0	0	0	0	0	0	0	0	0	0	0	0	0	0
ESV_433328	Eukaryota	Arthropoda	Insecta	Diptera	Cecidomyiidae			94.6	0	0	0	0	0	0	0	0	0	0	0	0	0	0	0	0	0	0	0	0	0	0	0	0	0	0	0	0	0	0	0	0	0	0	0	0	0	0	0	0	0
ESV_433334	Eukaryota	Arthropoda	Insecta	Diptera	Cecidomyiidae			94.9	0	0	0	0	0	0	0	0	0	0	0	0	0	0	0	0	0	0	0	0	0	0	0	0	0	0	0	0	0	0	0	0	0	0	0	0	0	0	0	0	0
ESV_433337	Eukaryota	Arthropoda	Insecta	Lepidoptera				96.2	0	0	0	0	0	0	0	0	0	0	0	0	0	0	0	0	0	0	0	0	0	0	0	0	0	0	0	0	0	0	0	0	0	0	0	0	0	0	0	0	0
ESV_433343	Eukaryota	Arthropoda	Insecta	Hymenoptera	Mymarommatidae			100	0	0	0	0	0	0	0	0	0	0	0	0	0	0	0	0	0	0	0	0	0	0	0	0	0	0	0	0	0	0	0	0	0	0	0	0	0	0	0	0	0
ESV_433348	Eukaryota	Arthropoda	Insecta	Diptera	Cecidomyiidae			96.8	0	0	0	0	0	0	0	0	0	0	0	0	0	0	0	0	0	0	0	0	0	0	0	0	0	0	0	0	0	0	0	0	0	0	0	0	0	0	0	0	0
ESV_433353	Eukaryota	Arthropoda	Insecta	Psocodea	Pseudocaeciliidae			100	0	0	27	0	0	0	0	0	0	0	0	0	0	0	0	0	0	0	0	0	0	0	0	0	0	0	0	0	0	0	0	0	0	0	0	0	0	0	0	0	0
ESV_433356	Eukaryota	Arthropoda	Insecta	Lepidoptera	Geometridae	Collix	Collix ghosha	90.4	0	0	0	0	0	0	0	0	0	0	0	0	0	0	0	0	0	0	0	0	0	0	0	0	0	0	0	0	0	0	0	0	0	0	0	0	0	0	0	0	0
ESV_433399	Eukaryota	Arthropoda	Insecta	Lepidoptera	Tortricidae	Uelia	Uelia sepidapex	94.9	0	0	0	0	0	0	0	0	0	0	0	0	0	0	0	0	0	0	0	0	0	0	0	0	0	0	0	0	0	0	0	0	0	0	0	0	0	0	0	0	0
ESV_433406	Eukaryota	Arthropoda	Insecta	Diptera	Cecidomyiidae			95.8	0	0	0	0	0	0	0	0	0	0	0	0	0	0	0	0	0	0	0	0	0	0	0	0	0	0	0	0	0	0	0	0	0	0	0	0	0	0	0	0	0
ESV_433407	Eukaryota	Arthropoda	Insecta	Lepidoptera				97.8	0	0	0	0	0	0	0	0	0	0	0	0	0	0	0	0	0	0	0	0	0	0	0	0	0	0	0	0	0	0	0	0	0	0	0	0	0	0	0	0	0
ESV_433416	Eukaryota	Arthropoda	Insecta	Lepidoptera	Nymphalidae	Acraea	Acraea violae	100	0	0	0	0	0	0	0	0	0	3	0	0	0	0	0	0	0	0	0	0	0	0	0	0	0	0	0	0	0	0	0	0	0	0	0	0	0	0	0	0	0
ESV_433465	Eukaryota	Arthropoda	Insecta	Lepidoptera	Geometridae	Hemithea	Hemithea sequestrata	89.8	0	0	0	0	0	0	0	0	0	0	0	0	0	0	0	0	0	0	0	0	0	0	0	0	0	0	0	0	0	0	0	0	0	0	0	0	0	0	0	0	0
ESV_433484	Eukaryota	Arthropoda	Insecta	Diptera	Cecidomyiidae			93.9	0	0	0	0	0	0	0	0	0	0	0	0	0	0	0	0	0	0	0	0	0	0	0	0	0	0	0	0	0	0	0	0	0	0	0	0	0	0	0	0	0
ESV_433494	Eukaryota	Arthropoda	Insecta	Diptera	Cecidomyiidae			94.6	0	0	0	0	0	0	0	0	0	0	0	0	0	0	0	0	0	0	0	0	0	0	0	0	0	0	0	0	0	0	0	0	0	0	0	0	0	0	0	0	0
ESV_433508	Eukaryota	Arthropoda	Insecta					87.2	0	0	0	0	0	0	0	0	0	0	0	0	0	0	0	0	0	0	0	0	0	0	0	0	0	0	0	0	0	0	0	0	0	0	0	0	0	0	0	0	0
ESV_433566	Eukaryota	Arthropoda	Insecta	Diptera	Cecidomyiidae			95.8	0	0	0	0	0	0	0	0	0	0	0	0	0	0	0	0	0	0	0	0	0	0	0	0	0	0	0	0	0	0	0	0	0	0	0	0	0	0	0	0	0
ESV_433570	Eukaryota	Arthropoda	Insecta	Diptera	Cecidomyiidae			95.2	0	0	0	0	0	0	0	0	0	0	0	0	0	0	0	0	0	0	0	0	0	0	0	0	0	0	0	0	0	0	0	0	0	0	0	0	0	0	0	0	0
ESV_433573	Eukaryota	Arthropoda	Insecta	Hymenoptera	Aphelinidae	Encarsia	Encarsia lounsburyi	100	0	0	0	0	0	0	0	0	0	0	0	0	0	0	0	0	0	0	0	0	0	0	0	0	0	0	0	0	0	0	0	0	0	0	0	0	0	0	0	0	0
ESV_433583	Eukaryota	Arthropoda	Insecta	Diptera	Cecidomyiidae			93.6	0	0	0	0	0	0	0	0	0	0	0	0	0	0	0	0	0	0	0	0	0	0	0	0	0	0	0	0	0	0	0	0	0	0	0	0	0	0	0	0	0
ESV_433598	Eukaryota	Arthropoda	Insecta	Diptera	Cecidomyiidae			93.6	0	0	0	0	0	0	0	0	0	0	0	0	0	0	0	0	0	0	0	0	0	0	0	0	0	0	0	0	0	0	0	0	0	0	0	0	0	0	0	0	0
ESV_433599	Eukaryota	Arthropoda	Insecta	Diptera	Cecidomyiidae			95.5	0	0	0	0	0	0	0	0	0	0	0	0	0	0	0	0	0	0	0	0	0	0	0	0	0	0	0	0	0	0	0	0	0	0	0	0	0	0	0	0	0
ESV_433638	Eukaryota	Arthropoda	Insecta	Diptera	Cecidomyiidae			95.5	0	0	0	0	0	0	0	0	0	0	0	0	0	0	0	0	0	0	0	0	0	0	0	0	0	0	0	0	0	0	0	0	0	0	0	0	0	0	0	0	0
ESV_433643	Eukaryota	Arthropoda	Insecta	Diptera	Cecidomyiidae			94.9	0	0	0	0	0	0	0	0	0	0	0	0	0	0	0	0	0	0	0	0	0	0	0	0	0	0	0	0	0	0	0	0	0	0	0	0	0	0	0	0	0
ESV_433644	Eukaryota	Arthropoda	Insecta	Diptera	Cecidomyiidae			95.5	0	0	0	0	0	0	0	0	0	0	0	0	0	0	0	0	0	0	0	0	0	0	0	0	0	2	1	6	2	0	0	1	0	0	0	0	0	0	0	0	0
ESV_433650	Eukaryota	Arthropoda	Insecta	Diptera	Cecidomyiidae			94.9	0	0	0	0	0	0	0	0	0	0	0	0	0	0	0	0	0	0	0	0	0	0	0	0	0	0	0	0	0	0	0	0	0	0	0	0	0	0	0	0	0
ESV_433655	Eukaryota	Arthropoda	Insecta	Diptera	Cecidomyiidae			97.4	0	0	0	0	0	0	0	0	1	0	0	0	0	0	0	0	0	0	0	0	0	0	0	0	0	0	0	0	0	0	0	0	0	0	0	0	0	0	0	0	0
ESV_433656	Eukaryota	Arthropoda	Insecta	Diptera	Cecidomyiidae			94.9	0	0	0	0	0	0	0	0	0	0	0	0	0	0	0	0	0	0	0	0	0	0	0	0	0	0	0	0	0	0	0	0	0	0	0	0	0	0	0	0	0
ESV_433661	Eukaryota	Arthropoda	Insecta	Diptera	Cecidomyiidae			97.7	0	0	0	0	0	0	0	0	0	0	0	0	0	0	0	0	0	0	0	0	0	0	0	0	0	0	0	0	0	0	0	0	0	0	0	0	0	0	0	0	0
ESV_433690	Eukaryota	Arthropoda	Insecta	Diptera	Cecidomyiidae			100	0	0	0	0	0	0	0	0	0	0	0	0	0	0	0	0	0	0	0	0	0	0	0	0	0	0	0	0	0	0	0	0	0	0	0	0	0	0	0	0	0
ESV_433692	Eukaryota	Arthropoda	Insecta	Diptera	Cecidomyiidae			97.1	0	0	0	0	0	0	0	0	0	0	0	0	0	0	0	0	0	0	0	0	0	0	0	0	0	0	0	0	0	0	0	0	0	0	0	0	0	0	0	0	0
ESV_433716	Eukaryota	Arthropoda	Insecta	Diptera	Cecidomyiidae			95.5	0	0	0	0	0	0	0	0	0	0	0	0	0	0	0	0	0	0	0	0	0	0	0	0	0	0	0	0	0	0	0	0	0	0	0	0	0	0	0	0	0
ESV_433726	Eukaryota	Arthropoda	Insecta	Diptera	Cecidomyiidae			95.5	0	0	0	0	0	0	0	0	0	0	0	0	0	0	0	0	0	0	0	0	0	0	0	0	0	0	0	0	0	0	0	0	0	0	0	0	0	0	0	0	0
ESV_433729	Eukaryota	Arthropoda	Insecta	Diptera	Cecidomyiidae			95.8	0	0	0	0	0	0	0	0	0	0	0	0	0	0	0	0	0	0	0	0	0	0	0	0	0	0	0	0	0	0	0	0	0	0	0	0	0	0	0	0	0
ESV_433737	Eukaryota	Arthropoda	Insecta	Diptera	Cecidomyiidae			94.2	0	0	0	0	0	0	0	0	0	0	0	0	0	0	0	0	0	0	0	0	0	0	0	0	0	0	0	0	0	0	0	0	0	0	0	0	0	0	0	0	0
ESV_433739	Eukaryota	Arthropoda	Insecta	Diptera	Cecidomyiidae			96.2	0	0	0	0	0	0	0	0	0	0	0	0	0	0	0	0	0	0	0	0	0	0	0	0	0	0	0	0	0	0	0	0	0	0	0	0	0	0	0	0	0
ESV_433740	Eukaryota	Arthropoda	Insecta	Diptera	Cecidomyiidae			94.6	0	0	0	0	0	0	0	0	0	0	0	0	0	0	0	0	0	0	0	0	0	0	0	0	0	0	0	1	0	0	0	0	0	0	0	0	0	0	0	0	0
ESV_433802	Eukaryota	Arthropoda	Insecta	Diptera	Cecidomyiidae			93.9	0	0	0	0	0	0	0	0	0	0	0	0	0	0	0	0	0	0	0	0	0	0	0	0	0	0	0	0	0	0	0	0	0	0	0	0	0	0	0	0	0
ESV_433808	Eukaryota	Arthropoda	Insecta	Diptera	Cecidomyiidae			93	0	0	0	0	0	0	0	0	0	0	0	0	0	0	0	0	0	0	0	0	0	0	0	0	0	0	0	0	0	0	0	0	0	0	0	0	0	0	0	0	0
ESV_433826	Eukaryota	Arthropoda	Insecta	Diptera	Cecidomyiidae			91.4	0	0	0	0	0	0	0	0	0	0	0	0	0	0	0	0	0	0	0	0	0	0	0	0	0	0	0	0	0	0	0	0	0	0	0	0	0	0	0	0	0
ESV_433847	Eukaryota	Arthropoda	Insecta	Diptera	Cecidomyiidae			100	0	0	0	0	0	0	0	0	0	0	0	0	0	0	0	0	0	0	0	0	0	0	0	0	0	0	0	0	0	0	0	0	0	0	0	0	0	0	0	0	0
ESV_433860	Eukaryota	Arthropoda	Insecta	Diptera	Cecidomyiidae			95.8	0	0	0	0	0	0	0	0	0	0	0	0	0	1	0	0	0	0	0	0	0	2	1	1	0	0	0	0	0	0	0	0	0	0	0	0	0	0	0	0	0
ESV_433870	Eukaryota	Arthropoda	Insecta	Diptera	Cecidomyiidae			94.9	0	0	0	0	0	0	0	0	0	0	0	0	0	0	0	0	0	0	0	0	0	0	0	0	0	0	0	0	0	0	0	0	0	0	0	0	0	0	0	0	0
ESV_433887	Eukaryota	Arthropoda	Insecta	Diptera	Cecidomyiidae			92.7	0	0	0	0	0	0	0	0	0	0	0	0	0	0	0	0	0	0	0	0	0	0	0	0	0	0	0	0	0	0	0	0	0	0	0	0	0	0	0	0	0
ESV_433892	Eukaryota	Arthropoda	Insecta	Diptera	Cecidomyiidae			94.9	0	0	0	0	0	0	0	0	0	0	0	0	0	0	0	0	0	0	0	0	0	0	0	0	0	0	0	0	0	0	0	0	0	0	0	0	0	0	0	0	0
ESV_433896	Eukaryota	Arthropoda	Insecta	Diptera	Cecidomyiidae			94.6	0	0	0	0	0	0	0	0	0	0	0	0	0	0	0	0	0	0	0	0	0	0	0	0	0	0	0	0	0	0	0	0	0	0	0	0	0	0	0	0	0
ESV_433928	Eukaryota	Arthropoda	Insecta	Lepidoptera				95.2	0	0	0	0	0	0	0	0	0	0	0	0	0	0	0	0	0	0	0	0	0	0	0	0	0	0	0	0	0	0	0	0	0	0	0	0	0	0	0	0	0
ESV_433940	Eukaryota	Arthropoda	Insecta	Diptera	Cecidomyiidae			93.9	0	0	0	0	0	0	0	0	0	0	0	0	0	0	0	0	0	0	0	0	0	0	0	0	0	0	0	0	0	0	0	0	0	0	0	0	0	0	0	0	0
ESV_433944	Eukaryota	Arthropoda	Insecta	Diptera	Cecidomyiidae			95.5	0	0	0	0	0	0	0	0	0	0	0	0	0	0	0	0	0	0	0	0	0	0	0	0	0	0	0	0	0	0	0	0	0	0	0	0	0	0	0	0	0
ESV_433973	Eukaryota	Arthropoda	Insecta	Diptera	Cecidomyiidae			94.9	0	0	0	0	0	0	0	0	0	0	0	0	3	1	1	1	1	0	2	0	1	1	1	1	0	0	0	0	0	0	0	0	0	0	0	0	0	0	0	0	0
ESV_433979	Eukaryota	Arthropoda	Insecta	Diptera	Cecidomyiidae			100	0	0	0	0	0	0	0	0	0	0	0	0	0	0	0	0	0	0	0	0	0	0	0	0	0	0	0	0	0	0	0	0	0	0	0	0	0	0	0	0	0
ESV_433983	Eukaryota	Arthropoda	Insecta	Diptera	Cecidomyiidae			94.9	0	0	0	0	0	0	0	0	0	0	0	0	0	0	0	0	0	0	0	0	0	0	0	0	0	0	0	0	0	0	0	0	0	0	0	0	0	0	0	0	0
ESV_434005	Eukaryota	Arthropoda	Insecta	Diptera	Cecidomyiidae			94.2	0	0	0	0	0	0	0	0	0	0	0	0	0	0	0	0	0	0	0	0	0	0	0	0	0	0	0	0	0	0	0	0	0	0	0	0	0	0	0	0	0
ESV_434010	Eukaryota	Arthropoda	Insecta	Thysanoptera				96.8	0	0	0	0	0	0	0	0	0	0	0	0	0	0	0	0	0	0	0	0	0	0	0	0	0	0	0	0	0	0	0	0	0	0	0	0	0	0	0	0	0
ESV_434027	Eukaryota	Arthropoda	Insecta	Diptera	Cecidomyiidae			95.5	0	0	0	0	0	0	0	0	0	0	0	0	0	0	0	0	0	0	0	0	0	0	0	0	0	0	0	0	0	0	0	0	0	0	0	0	0	0	0	0	0
ESV_434039	Eukaryota	Arthropoda	Insecta	Diptera	Cecidomyiidae			93	0	0	0	0	0	0	0	0	0	0	0	0	0	0	0	0	0	0	0	0	0	0	0	0	0	0	0	0	0	0	0	0	0	0	0	0	0	0	0	0	0
ESV_434051	Eukaryota	Arthropoda	Insecta	Lepidoptera	Nymphalidae	Mydosama	Mydosama patiana	98.7	0	0	0	0	0	0	0	0	0	0	0	0	0	0	0	0	0	0	0	0	0	0	0	0	0	0	0	0	0	0	0	0	0	0	0	0	0	0	0	0	0
ESV_434052	Eukaryota	Arthropoda	Insecta	Diptera	Cecidomyiidae			94.2	0	0	0	0	0	0	0	0	0	0	0	0	0	0	0	0	0	0	0	0	0	0	0	0	0	0	0	0	0	0	0	0	0	0	0	0	0	0	0	0	0
ESV_434059	Eukaryota	Arthropoda	Insecta	Diptera	Cecidomyiidae			94.9	0	0	0	0	0	0	0	0	0	0	0	0	0	0	0	0	0	0	0	0	0	0	0	0	0	0	0	0	0	0	0	0	0	0	0	0	0	0	0	0	0
ESV_434063	Eukaryota	Arthropoda	Insecta	Diptera	Cecidomyiidae			94.2	0	0	0	0	0	0	0	0	0	0	0	0	0	0	0	0	0	0	0	0	0	0	0	0	0	0	0	0	0	0	0	0	0	0	0	0	0	0	0	0	0
ESV_434065	Eukaryota	Arthropoda	Insecta					96.8	0	0	0	0	0	0	0	0	0	0	0	0	0	0	0	0	0	0	0	0	0	0	0	0	0	0	0	0	0	0	0	0	0	0	0	0	0	0	0	0	0
ESV_434073	Eukaryota	Arthropoda	Insecta	Diptera	Cecidomyiidae			94.2	0	0	0	0	0	0	0	0	0	0	0	0	0	0	0	0	0	0	0	0	0	0	0	0	0	0	0	0	0	0	0	0	0	0	0	0	0	0	0	0	0
ESV_434077	Eukaryota	Arthropoda	Insecta					96.2	0	0	0	0	0	0	0	0	0	0	0	0	0	0	0	0	0	0	0	0	0	0	0	0	0	0	0	0	0	0	0	0	0	0	0	0	0	0	0	0	0
ESV_434083	Eukaryota	Arthropoda	Insecta	Diptera	Cecidomyiidae			95.8	0	0	0	0	0	0	0	0	0	0	0	0	0	0	0	0	0	0	0	0	0	0	0	0	0	0	0	0	0	1	0	0	0	0	0	0	0	0	0	0	0
ESV_434930	Eukaryota	Arthropoda	Insecta	Diptera	Cecidomyiidae			95.2	0	0	0	0	0	0	0	0	0	0	0	0	0	0	0	0	0	0	0	0	0	0	0	0	0	0	0	0	0	0	0	0	0	0	0	0	0	0	0	0	0
ESV_434934	Eukaryota	Arthropoda	Insecta	Diptera	Cecidomyiidae			94.9	0	0	0	0	0	0	0	0	0	0	0	0	0	0	0	0	0	0	0	0	0	0	0	0	0	0	0	0	0	0	0	0	0	0	0	0	0	0	0	0	0
ESV_434942	Eukaryota	Arthropoda	Insecta	Diptera	Cecidomyiidae			95.2	13	0	5	2	5	1	3	3	3	2	6	4	0	0	0	0	0	0	0	0	0	0	0	0	0	0	0	0	0	0	0	0	0	0	0	0	0	0	0	0	0
ESV_434951	Eukaryota	Arthropoda	Insecta	Diptera	Psychodidae			100	5	0	2	1	5	18	1	2	4	6	1	2	0	0	0	0	0	0	0	0	0	0	0	0	0	0	0	0	0	0	0	0	0	0	0	0	0	0	0	0	0
ESV_434959	Eukaryota	Arthropoda	Insecta	Diptera	Cecidomyiidae			94.6	0	0	0	0	0	0	0	0	0	0	0	0	34	9	7	6	5	6	10	9	7	7	8	4	0	0	0	0	0	0	0	0	0	0	0	1	0	0	0	0	0
ESV_434961	Eukaryota	Arthropoda	Insecta	Diptera	Cecidomyiidae			93	0	0	0	0	0	0	0	0	0	0	0	0	21	21	9	6	3	9	7	1	8	3	9	4	0	0	0	0	0	0	0	0	0	0	0	0	0	0	0	0	0
ESV_434968	Eukaryota	Arthropoda	Insecta	Diptera	Cecidomyiidae			92.7	0	0	0	0	0	0	0	0	0	0	0	0	3	9	13	4	0	3	1	4	2	3	0	2	0	0	0	0	0	0	0	0	0	0	0	0	0	0	0	0	0
ESV_435012	Eukaryota	Arthropoda	Insecta	Diptera	Cecidomyiidae			94.6	0	0	0	0	0	0	0	0	0	0	0	0	25	2	14	4	6	5	8	4	1	14	2	2	0	0	0	0	0	0	0	0	0	0	0	0	0	0	0	0	0
ESV_435023	Eukaryota	Arthropoda	Insecta	Diptera	Cecidomyiidae			94.9	0	0	0	0	0	0	0	0	0	0	0	0	0	0	0	0	0	0	0	0	0	0	0	0	23	109	12	25	11	12	9	11	28	11	13	12	0	0	0	0	0
ESV_435024	Eukaryota	Arthropoda	Insecta	Diptera				97.1	15	0	2	0	0	1	0	0	18	1	1	1	0	0	0	0	0	0	0	0	0	0	0	0	3	1	2	1	0	2	1	0	2	1	0	0	0	0	0	0	0
ESV_435027	Eukaryota	Arthropoda	Insecta	Diptera	Cecidomyiidae			94.2	0	0	0	0	0	0	0	0	0	0	0	0	0	0	0	0	0	0	0	0	0	0	0	0	12	5	0	3	3	2	2	4	1	1	0	2	0	0	0	0	0
ESV_435031	Eukaryota	Arthropoda	Insecta	Diptera	Cecidomyiidae			94.2	0	0	0	0	0	0	0	0	0	0	0	0	0	0	0	0	0	0	0	0	0	0	0	0	10	11	23	18	8	9	12	15	7	17	10	5	0	0	0	0	0
ESV_435039	Eukaryota	Arthropoda	Insecta	Diptera	Cecidomyiidae			95.2	0	0	0	0	0	0	0	0	0	0	0	0	0	0	0	0	0	0	0	0	0	0	0	0	206	94	54	49	37	46	25	20	33	46	48	40	0	0	0	0	0
ESV_435049	Eukaryota	Arthropoda	Insecta	Coleoptera	Curculionidae	Curculio	Curculio sp. 2 ZM-2022a	92	0	0	0	0	0	0	0	0	0	0	0	0	0	0	0	0	0	0	0	0	0	0	0	0	0	0	0	1	0	0	0	0	0	1	0	0	2	0	46	0	1
ESV_435055	Eukaryota	Arthropoda	Insecta	Diptera	Sciaridae			99.7	0	0	0	0	0	0	0	0	0	0	0	0	0	0	0	0	0	0	0	0	0	0	0	0	0	0	0	0	0	0	0	0	0	0	0	0	0	3	4	13	2
ESV_435097	Eukaryota	Arthropoda	Arachnida	Ixodida	Ixodidae	Amblyomma		100	0	0	0	0	0	0	0	0	0	0	0	0	0	0	0	0	0	0	0	0	0	0	0	0	0	0	0	0	0	0	0	0	0	1	0	0	34	2	3	0	1
ESV_435101	Eukaryota	Arthropoda	Insecta	Diptera	Cecidomyiidae			93.9	0	0	0	0	0	0	0	0	0	0	0	0	0	0	0	0	0	0	0	0	0	0	0	0	0	0	0	0	0	0	0	0	0	0	0	0	0	0	0	0	0
ESV_435102	Eukaryota	Arthropoda	Insecta	Diptera	Cecidomyiidae			92.6	0	0	0	0	0	0	0	0	0	0	0	0	0	0	0	0	0	0	0	0	0	0	0	0	0	0	0	0	0	0	0	0	0	0	0	0	0	0	0	0	0
ESV_435107	Eukaryota	Arthropoda	Insecta	Diptera	Cecidomyiidae	Prodiplosis	Prodiplosis floricola	93.3	0	0	0	0	0	0	0	0	0	0	0	0	0	0	0	0	0	0	0	0	0	0	0	0	0	0	0	0	0	0	0	0	0	0	0	0	0	0	0	0	0
ESV_435115	Eukaryota	Arthropoda	Insecta	Diptera	Cecidomyiidae			93.9	0	0	0	0	0	0	0	0	0	0	0	0	0	0	0	0	0	0	0	0	0	0	0	0	168	29	52	38	23	10	21	19	19	19	23	16	0	0	0	0	0
ESV_435119	Eukaryota	Arthropoda	Insecta	Diptera	Cecidomyiidae			96.5	0	0	0	0	0	0	0	0	0	0	0	0	0	0	0	0	0	0	0	0	0	0	0	0	0	0	0	0	0	0	0	0	0	0	0	0	0	0	0	0	0
ESV_435122	Eukaryota	Arthropoda	Insecta	Diptera	Cecidomyiidae			96.5	0	0	0	0	0	0	0	0	0	0	0	0	0	0	0	0	0	0	0	0	0	0	0	0	0	0	0	0	0	0	0	0	0	0	0	0	0	0	0	0	0
ESV_435128	Eukaryota	Arthropoda	Insecta	Diptera	Cecidomyiidae			94.6	0	0	0	0	0	0	0	0	0	0	0	0	0	0	0	0	0	0	0	0	0	0	0	0	0	0	0	0	0	0	0	0	0	0	0	0	0	0	0	0	0
ESV_435131	Eukaryota	Arthropoda	Insecta	Diptera	Cecidomyiidae			98.1	0	0	0	0	0	0	0	0	0	0	0	0	0	0	0	0	0	0	0	0	0	0	0	0	16	80	16	34	30	20	16	16	13	22	18	19	0	0	0	0	0
ESV_435138	Eukaryota	Arthropoda	Insecta	Diptera	Cecidomyiidae			93.9	0	0	0	0	0	0	0	0	0	0	0	0	0	0	0	0	0	0	0	0	0	0	0	0	0	0	0	0	0	0	0	0	0	0	0	0	0	0	0	0	0
ESV_435140	Eukaryota	Arthropoda	Insecta	Diptera	Cecidomyiidae			97.1	0	0	0	0	0	0	0	0	0	0	0	0	0	0	0	0	0	0	0	0	0	0	0	0	63	30	62	52	36	23	42	16	53	40	33	34	0	0	0	0	0
ESV_435144	Eukaryota	Arthropoda	Insecta	Diptera	Cecidomyiidae			94.6	0	0	0	0	0	0	0	0	0	0	0	0	0	0	0	0	0	0	0	0	0	0	0	0	0	1	0	0	1	0	0	0	0	0	0	0	0	0	0	0	0
ESV_435150	Eukaryota	Arthropoda	Insecta					94.9	0	0	0	0	0	0	0	0	0	0	0	0	0	0	0	0	0	0	0	0	0	0	0	0	0	0	0	0	0	0	0	0	0	0	0	0	0	0	0	0	0
ESV_435155	Eukaryota	Arthropoda	Insecta	Diptera	Cecidomyiidae			96.8	0	0	0	0	0	0	0	0	0	0	0	0	0	0	0	0	0	0	0	0	0	0	0	0	0	0	0	0	0	0	0	0	0	0	0	0	0	0	0	0	0
ESV_435162	Eukaryota	Arthropoda	Insecta	Diptera	Cecidomyiidae			94.9	0	0	0	0	0	0	0	0	0	0	0	0	0	0	0	0	0	0	0	0	0	0	0	0	0	0	0	0	0	0	0	0	0	0	0	0	0	0	0	0	0
ESV_435169	Eukaryota	Arthropoda	Insecta	Diptera	Cecidomyiidae			93.9	0	0	0	0	0	0	0	0	0	0	0	0	0	0	0	0	0	0	0	0	0	0	0	0	0	0	1	0	0	0	0	0	0	0	0	0	0	0	0	0	0
ESV_435170	Eukaryota	Arthropoda	Insecta	Diptera	Cecidomyiidae			93.9	0	0	0	0	0	0	0	0	0	0	0	0	0	0	0	0	0	0	0	0	0	0	0	0	0	0	0	0	0	0	0	0	0	0	0	0	0	0	0	0	0
ESV_435171	Eukaryota	Arthropoda	Insecta	Diptera	Cecidomyiidae			94.6	0	0	0	0	0	0	0	0	0	0	0	0	0	0	0	0	0	0	0	0	0	0	0	0	0	0	0	0	0	0	0	0	0	0	0	0	0	0	0	0	0
ESV_435176	Eukaryota	Arthropoda	Insecta	Diptera	Cecidomyiidae			95.5	0	0	0	0	0	0	0	0	0	0	0	0	0	0	0	0	0	0	0	0	0	0	0	0	0	0	0	0	0	0	0	0	0	0	0	0	0	0	0	0	0
ESV_435177	Eukaryota	Arthropoda	Insecta	Diptera	Cecidomyiidae			94.2	0	0	0	0	0	0	0	0	0	0	0	0	0	0	0	0	0	0	0	0	0	0	0	0	0	0	0	0	0	0	0	0	0	0	0	1	0	0	0	0	0
ESV_435181	Eukaryota	Arthropoda	Insecta	Diptera	Cecidomyiidae			95.9	0	0	0	0	0	0	0	0	0	0	0	0	0	0	0	0	0	0	0	0	0	0	0	0	0	0	0	0	0	0	0	0	0	0	0	0	0	0	0	0	0
ESV_435204	Eukaryota	Arthropoda	Insecta	Diptera	Cecidomyiidae			93.3	0	0	0	0	0	0	0	0	0	0	0	0	0	0	0	0	0	0	0	0	0	0	0	0	0	0	0	0	0	0	0	0	0	0	0	0	0	0	0	0	0
ESV_435285	Eukaryota	Arthropoda	Insecta	Diptera	Cecidomyiidae			93.3	0	0	0	0	0	0	0	0	0	0	0	0	0	0	0	0	0	0	0	0	0	0	0	0	0	0	0	0	0	0	0	0	0	0	0	0	0	0	0	0	0
ESV_435288	Eukaryota	Arthropoda	Insecta	Diptera	Phoridae			95.5	0	0	0	0	0	0	0	0	0	0	0	0	0	0	0	0	0	0	0	0	0	0	0	0	0	0	0	0	0	0	0	0	0	0	0	0	0	0	0	0	0
ESV_435294	Eukaryota	Arthropoda	Insecta	Diptera	Cecidomyiidae			94.9	0	0	0	0	0	0	0	0	0	0	0	0	0	0	0	0	0	0	0	0	0	0	0	0	0	0	0	0	0	0	0	0	0	0	0	0	0	0	0	0	0
ESV_435301	Eukaryota	Arthropoda	Insecta	Diptera	Cecidomyiidae			93.3	0	0	0	0	0	0	0	0	0	0	0	0	0	0	0	0	0	0	0	0	0	0	0	0	0	0	0	0	0	0	0	0	0	0	0	0	0	0	0	0	0
ESV_435303	Eukaryota	Arthropoda	Insecta	Diptera	Cecidomyiidae			93.6	0	0	0	0	0	0	0	0	0	0	0	0	0	0	0	0	0	0	0	0	0	0	0	0	0	0	0	0	0	0	0	0	0	0	0	0	0	0	0	0	0
ESV_435307	Eukaryota	Arthropoda	Insecta	Hymenoptera	Aphelinidae			96.4	0	0	0	0	0	0	0	0	0	0	0	0	0	0	0	0	0	0	0	0	0	0	0	0	0	0	0	0	0	0	0	0	0	0	0	0	0	0	0	0	0
ESV_435316	Eukaryota	Arthropoda	Insecta	Diptera	Cecidomyiidae			94.6	0	0	0	0	0	0	0	0	0	0	0	0	0	0	0	0	0	0	0	0	0	0	0	0	0	0	0	0	0	0	0	0	0	0	0	0	0	0	0	0	0
ESV_435320	Eukaryota	Arthropoda	Insecta	Diptera	Cecidomyiidae			96.5	0	0	0	0	0	0	0	0	0	0	0	0	0	0	0	0	0	0	0	0	0	0	0	0	0	0	0	0	0	0	0	0	0	0	0	0	0	0	0	0	0
ESV_435324	Eukaryota	Arthropoda	Insecta	Diptera	Cecidomyiidae			94.2	0	0	0	0	0	0	0	0	0	0	0	0	0	0	0	0	0	1	0	1	1	0	0	1	0	0	0	0	0	0	0	0	0	0	0	0	0	0	0	0	0
ESV_435326	Eukaryota	Arthropoda	Insecta	Diptera	Cecidomyiidae			94.6	0	0	0	0	0	0	0	0	0	0	0	0	0	0	0	0	0	0	0	0	0	0	0	0	0	0	0	0	0	0	0	0	0	0	0	0	0	0	0	0	0
ESV_435328	Eukaryota	Arthropoda	Insecta	Coleoptera				85.3	0	0	0	0	0	0	0	0	0	0	0	0	0	0	0	0	0	0	0	0	0	0	0	0	0	0	0	0	0	0	0	0	0	0	0	0	0	0	0	0	0
ESV_435331	Eukaryota	Arthropoda	Insecta	Diptera	Cecidomyiidae			99.4	0	0	0	0	0	0	0	0	0	0	0	0	0	0	0	0	0	0	0	0	0	0	0	0	0	0	0	0	0	0	0	0	0	0	0	0	0	0	0	0	0
ESV_435332	Eukaryota	Arthropoda	Insecta	Diptera	Cecidomyiidae			97.1	0	0	0	0	0	0	0	0	0	0	0	0	0	0	0	0	0	0	0	0	0	0	0	0	0	0	0	0	0	0	0	0	0	0	0	0	0	0	0	0	0
ESV_435336	Eukaryota	Arthropoda	Insecta					95.5	0	0	0	0	0	0	0	0	0	0	0	0	0	0	0	0	0	0	0	0	0	0	0	0	0	0	0	0	0	0	0	0	0	0	0	0	0	0	0	0	0
ESV_435338	Eukaryota	Arthropoda	Insecta					95.8	0	0	0	0	0	0	0	0	0	0	0	0	0	0	0	0	0	0	0	0	0	0	0	0	0	0	0	0	0	0	0	0	0	0	0	0	0	0	0	0	0
ESV_435345	Eukaryota	Arthropoda	Insecta	Diptera	Cecidomyiidae			92.3	0	0	0	0	0	0	0	0	0	0	0	0	0	0	0	0	0	0	0	0	0	0	0	0	37	19	24	15	1	9	8	3	8	15	6	5	0	0	0	0	0
ESV_435355	Eukaryota	Arthropoda	Insecta	Diptera	Cecidomyiidae			93.3	0	0	0	0	0	0	0	0	0	0	0	0	0	0	0	0	0	0	0	0	0	0	0	0	0	0	0	0	0	0	0	0	0	0	0	0	0	0	0	0	0
ESV_435359	Eukaryota	Arthropoda	Insecta	Diptera	Cecidomyiidae			95.5	0	0	0	0	0	0	0	0	0	0	0	0	0	0	0	0	0	0	0	0	0	0	0	0	0	0	0	0	0	0	0	0	0	0	0	0	0	0	0	0	0
ESV_435360	Eukaryota	Arthropoda	Insecta	Diptera	Cecidomyiidae			100	0	0	0	0	0	0	0	0	0	0	0	0	0	0	0	0	0	0	0	0	0	0	0	0	0	0	0	0	0	0	0	0	0	0	0	0	0	0	0	0	0
ESV_435383	Eukaryota	Arthropoda	Insecta	Diptera	Cecidomyiidae			95.8	0	0	0	0	0	0	0	0	0	0	0	0	0	0	0	0	0	0	0	0	0	0	0	0	0	0	0	0	0	0	0	0	0	0	0	0	0	0	0	0	0
ESV_435386	Eukaryota	Arthropoda	Insecta	Diptera	Cecidomyiidae			94.6	0	0	0	0	0	0	0	0	0	0	0	0	0	0	0	0	0	0	0	0	0	0	0	0	0	0	0	0	0	0	0	0	0	0	0	0	0	0	0	0	0
ESV_435390	Eukaryota	Arthropoda	Insecta					96.8	0	0	0	0	0	0	0	0	0	0	0	0	0	0	0	0	0	0	0	0	0	0	0	0	0	0	0	0	0	0	0	0	0	0	0	0	0	0	0	0	0
ESV_435396	Eukaryota	Arthropoda	Insecta	Diptera	Cecidomyiidae			95.5	0	0	0	0	0	0	0	0	0	0	0	0	0	0	0	0	0	0	0	0	0	0	0	0	0	0	0	0	0	0	0	0	0	0	0	0	0	0	0	0	0
ESV_435400	Eukaryota	Arthropoda	Insecta	Diptera	Cecidomyiidae			93.9	0	0	0	0	0	0	0	0	0	0	0	0	0	0	0	0	0	0	0	0	0	0	0	0	0	0	0	0	0	0	0	0	0	0	0	0	0	0	0	0	0
ESV_435405	Eukaryota	Arthropoda	Insecta	Diptera	Cecidomyiidae			93.9	0	0	0	0	0	0	0	0	0	0	0	0	0	0	0	0	0	0	0	0	0	0	0	0	0	0	0	0	0	0	0	0	0	0	0	0	0	0	0	0	0
ESV_435408	Eukaryota	Arthropoda	Insecta	Diptera	Cecidomyiidae			97.8	0	0	0	0	0	0	0	0	0	0	0	0	0	0	0	0	0	0	0	0	0	0	0	0	0	0	0	0	0	0	0	0	0	0	0	0	0	0	0	0	0
ESV_435412	Eukaryota	Arthropoda	Insecta	Diptera	Cecidomyiidae			94.6	0	0	0	0	0	0	0	0	0	0	0	0	0	0	0	0	0	0	0	0	0	0	0	0	0	0	0	0	0	0	0	0	0	0	0	0	0	0	0	0	0
ESV_435426	Eukaryota	Arthropoda	Insecta	Diptera	Cecidomyiidae			99.7	0	0	0	0	0	0	0	0	0	0	0	0	0	0	0	0	0	0	0	0	0	0	0	0	0	0	0	0	0	0	0	0	0	0	0	0	0	0	0	0	0
ESV_435429	Eukaryota	Arthropoda	Insecta					96.8	0	0	0	0	0	0	0	0	0	0	0	0	0	0	0	0	0	0	0	0	0	0	0	0	0	0	0	0	0	0	0	0	0	0	0	0	0	0	0	0	0
ESV_435430	Eukaryota	Arthropoda	Insecta					95.9	0	0	0	0	0	0	0	0	0	0	0	0	0	0	0	0	0	0	0	0	0	0	0	0	0	0	0	0	0	0	0	0	0	0	0	0	0	0	0	0	0
ESV_435436	Eukaryota	Arthropoda	Insecta	Diptera	Cecidomyiidae			93	0	0	0	0	0	0	0	0	0	0	0	0	0	0	0	0	0	0	0	0	0	0	0	0	0	0	0	0	0	0	0	0	0	0	0	0	0	0	0	0	0
ESV_435437	Eukaryota	Arthropoda	Insecta	Diptera	Cecidomyiidae			93.6	0	0	0	0	0	0	0	0	0	0	0	0	0	0	0	0	0	0	0	0	0	0	0	0	0	0	0	0	0	0	0	0	0	0	0	0	0	0	0	0	0
ESV_435438	Eukaryota	Arthropoda	Insecta	Diptera	Cecidomyiidae			100	0	0	0	0	0	0	0	0	0	0	0	0	0	0	0	0	0	0	0	0	0	0	0	0	0	0	0	0	0	0	0	0	0	0	0	0	0	0	0	0	0
ESV_435440	Eukaryota	Arthropoda	Insecta	Diptera	Cecidomyiidae			92.3	0	0	0	0	0	0	0	0	0	0	0	0	0	0	0	0	0	0	0	0	0	0	0	0	0	0	0	0	0	0	0	0	0	0	0	0	0	0	0	0	0
ESV_435443	Eukaryota	Arthropoda	Insecta	Diptera	Cecidomyiidae			95.2	0	0	0	0	0	0	0	0	0	0	0	0	0	0	0	0	0	0	0	0	0	0	0	0	0	0	0	0	0	0	0	0	0	0	0	1	0	0	0	0	0
ESV_435446	Eukaryota	Arthropoda	Insecta	Coleoptera	Cleridae			88.5	0	0	0	0	0	0	0	0	0	0	0	0	0	0	0	0	0	0	0	0	0	0	0	0	0	0	0	0	0	0	0	0	0	0	0	0	0	0	0	0	0
ESV_435459	Eukaryota	Arthropoda	Insecta	Diptera	Cecidomyiidae			93.3	0	0	0	0	0	0	0	0	0	0	0	0	0	0	0	0	0	0	0	0	0	0	0	0	0	0	0	0	0	0	0	0	0	0	0	0	0	0	0	0	0
ESV_435474	Eukaryota	Arthropoda	Insecta	Diptera	Cecidomyiidae			93.3	0	0	0	0	0	0	0	0	0	0	0	0	0	0	0	0	0	0	0	0	0	0	0	0	0	0	0	0	0	0	0	0	0	0	0	0	0	0	0	0	0
ESV_435492	Eukaryota	Arthropoda	Insecta	Diptera	Cecidomyiidae			94.6	0	0	0	0	0	0	0	0	0	0	0	0	0	0	0	0	0	0	0	0	0	0	0	0	0	0	0	0	0	0	0	0	0	0	0	0	0	0	0	0	0
ESV_435494	Eukaryota	Arthropoda	Insecta	Lepidoptera				96.2	0	0	0	0	0	0	0	0	0	0	0	0	0	0	0	0	0	0	0	0	0	0	0	0	0	0	0	0	0	0	0	0	0	0	0	0	0	0	0	0	0
ESV_435499	Eukaryota	Arthropoda	Insecta	Diptera	Cecidomyiidae			99.7	0	0	0	0	0	0	0	0	0	0	0	0	0	0	0	0	0	0	0	0	0	0	0	0	0	0	0	0	0	0	0	0	0	0	0	0	0	0	0	0	0
ESV_435501	Eukaryota	Arthropoda	Insecta	Lepidoptera	Tineidae	Apreta	Apreta paradoxella	93.2	0	0	0	0	0	0	0	0	0	0	0	0	0	0	0	0	0	0	0	0	0	0	0	0	0	0	0	0	0	0	0	0	0	0	0	0	0	0	0	0	0
ESV_435502	Eukaryota	Arthropoda	Insecta	Diptera				100	0	0	0	0	0	0	0	0	0	0	0	0	0	0	0	0	0	0	0	0	0	0	0	0	0	0	0	0	0	0	0	0	0	0	0	0	0	0	0	0	0
ESV_435504	Eukaryota	Arthropoda	Insecta	Lepidoptera				96.2	0	0	0	0	0	0	0	0	0	0	0	0	0	0	0	0	0	0	0	0	0	0	0	0	0	0	0	0	0	0	0	0	0	0	0	0	0	0	0	0	0
ESV_435522	Eukaryota	Arthropoda	Insecta	Diptera	Cecidomyiidae			94.2	0	0	0	0	0	0	0	0	0	0	0	0	0	0	0	0	0	0	0	0	0	0	0	0	0	0	0	0	0	0	0	0	0	0	0	0	0	0	0	0	0
ESV_435531	Eukaryota	Arthropoda	Insecta	Hemiptera	Thaumastocoridae	Discocoris	Discocoris drakei	93.6	0	0	0	0	0	0	0	0	0	0	0	0	0	0	0	0	0	0	0	0	0	0	0	0	0	0	0	0	0	0	0	0	0	0	0	0	0	0	0	0	0
ESV_435545	Eukaryota	Arthropoda	Insecta	Diptera	Cecidomyiidae			93.3	0	0	0	0	0	0	0	0	0	0	0	0	0	0	0	0	0	0	0	0	0	0	0	0	0	0	0	0	0	0	0	0	0	0	0	0	0	0	0	0	0
ESV_435552	Eukaryota	Arthropoda	Insecta	Diptera	Cecidomyiidae			96.5	0	0	0	0	0	0	0	0	0	0	0	0	0	0	0	0	0	0	0	0	0	0	0	0	0	0	0	0	0	0	0	0	0	0	0	0	0	0	0	0	0
ESV_435553	Eukaryota	Arthropoda	Insecta	Diptera	Cecidomyiidae			95.5	0	0	0	0	0	0	0	0	0	0	0	0	0	0	0	0	0	0	0	0	0	0	0	0	0	0	0	0	0	0	0	0	0	0	0	0	0	0	0	0	0
ESV_435560	Eukaryota	Arthropoda	Insecta	Coleoptera	Trogossitidae			93.3	0	0	0	0	0	0	0	0	0	0	0	0	0	0	0	0	0	0	0	0	0	0	0	0	0	0	0	0	0	0	0	0	0	0	0	0	0	0	0	0	0
ESV_435561	Eukaryota	Arthropoda	Insecta	Diptera	Cecidomyiidae			94.9	0	0	0	0	0	0	0	0	0	0	0	0	0	0	0	0	0	0	0	0	0	0	0	0	0	0	0	0	0	0	0	0	0	0	0	0	0	0	0	0	0
ESV_435578	Eukaryota	Arthropoda	Insecta	Diptera	Cecidomyiidae			89.1	0	0	0	0	0	0	0	0	0	0	0	0	0	0	0	0	0	0	0	0	0	0	0	0	0	0	0	0	0	0	0	0	0	0	0	0	0	0	0	0	0
ESV_435584	Eukaryota	Arthropoda	Insecta	Diptera	Cecidomyiidae			92.3	0	0	0	0	0	0	0	0	0	0	0	0	0	0	0	0	0	0	0	0	0	0	0	0	0	0	0	0	0	0	0	0	0	0	0	0	0	0	0	0	0
ESV_435586	Eukaryota	Arthropoda	Insecta	Diptera	Cecidomyiidae			95.8	0	0	0	0	0	0	0	0	0	0	0	0	0	0	0	0	0	0	0	0	0	0	0	0	0	0	0	0	0	0	0	0	0	0	0	0	0	0	0	0	0
ESV_435587	Eukaryota	Arthropoda	Insecta	Diptera	Phoridae			93	0	0	0	0	0	0	0	0	0	0	0	0	0	0	0	0	0	0	0	0	0	0	0	0	0	0	0	0	0	0	0	0	0	0	0	0	0	0	0	0	0
ESV_435590	Eukaryota	Arthropoda	Insecta	Diptera	Cecidomyiidae			100	0	0	0	0	0	0	0	0	0	0	0	0	0	0	0	0	0	0	0	0	0	0	0	0	0	0	0	0	0	0	0	0	0	0	0	0	0	0	0	0	0
ESV_435596	Eukaryota	Arthropoda	Insecta	Diptera	Phoridae			93.3	0	0	0	0	0	0	0	0	0	0	0	0	0	0	0	0	0	0	0	0	0	0	0	0	0	0	0	0	0	0	0	0	0	0	0	0	0	0	0	0	0
ESV_435600	Eukaryota	Arthropoda	Insecta	Diptera	Cecidomyiidae			93	0	0	0	0	0	0	0	0	0	0	0	0	0	0	0	0	0	0	0	0	0	0	0	0	0	0	0	0	0	0	0	0	0	0	0	0	0	0	0	0	0
ESV_435601	Eukaryota	Arthropoda	Insecta	Diptera	Phoridae			97.8	0	0	0	0	0	0	0	0	0	0	0	0	0	0	0	0	0	0	0	0	0	0	0	0	0	0	0	0	0	0	0	0	0	0	0	0	0	0	0	0	0
ESV_435604	Eukaryota	Arthropoda	Insecta	Diptera	Cecidomyiidae			93.3	0	0	0	0	0	0	0	0	0	0	0	0	0	0	0	0	0	0	0	0	0	0	0	0	0	0	0	0	0	0	0	0	0	0	0	0	0	0	0	0	0
ESV_435609	Eukaryota	Arthropoda	Insecta	Diptera	Cecidomyiidae			95.5	0	0	0	0	0	0	0	0	0	0	0	0	0	0	0	0	0	0	0	0	0	0	0	0	0	0	0	0	0	0	0	0	0	0	0	0	0	0	0	0	0
ESV_435611	Eukaryota	Arthropoda	Insecta					97.8	0	0	0	0	0	0	0	0	0	0	0	0	0	0	0	0	0	0	0	0	0	0	0	0	0	0	0	0	0	0	0	0	0	0	0	0	0	0	0	0	0
ESV_435616	Eukaryota	Arthropoda	Insecta	Diptera	Cecidomyiidae			94.2	0	0	0	0	0	0	0	0	0	0	0	0	0	0	0	0	0	0	0	0	0	0	0	0	0	0	0	0	0	0	0	0	0	0	0	0	0	0	0	0	0
ESV_435623	Eukaryota	Arthropoda	Insecta	Diptera	Cecidomyiidae			95.2	0	0	0	0	0	0	0	0	0	0	0	0	0	0	0	0	0	0	0	0	0	0	0	0	0	0	0	0	0	0	0	0	0	0	0	0	0	0	0	0	0
ESV_435625	Eukaryota	Arthropoda	Insecta	Diptera	Cecidomyiidae			91.1	0	0	0	0	0	0	0	0	0	0	0	0	0	0	0	0	0	0	0	0	0	0	0	0	0	0	0	0	0	0	0	0	0	0	0	0	0	0	0	0	0
ESV_435635	Eukaryota	Arthropoda	Insecta	Diptera	Cecidomyiidae			96.8	0	0	0	0	0	0	0	0	0	0	0	0	0	0	0	0	0	0	0	0	0	0	0	0	0	0	0	0	0	0	0	0	0	0	0	0	0	0	0	0	0
ESV_435691	Eukaryota	Arthropoda	Insecta	Psocoptera	Lepidopsocidae			100	3	0	0	0	0	31	1	0	0	2	0	0	0	0	0	0	0	0	0	0	0	0	0	1	1	1	1	20	1	1	0	0	0	0	0	0	0	0	0	0	0
ESV_435707	Eukaryota	Arthropoda	Insecta	Diptera	Cecidomyiidae			93.9	0	0	0	0	0	0	0	0	0	0	0	0	0	0	0	0	0	0	0	0	0	0	0	0	0	0	0	0	0	0	0	0	0	0	0	0	0	0	0	0	0
ESV_435712	Eukaryota	Arthropoda	Insecta	Diptera	Cecidomyiidae			94.2	0	0	0	0	0	0	0	0	0	0	0	0	0	0	0	0	0	0	0	0	0	0	0	0	0	0	0	0	0	0	0	0	0	0	0	0	0	0	0	0	0
ESV_435717	Eukaryota	Arthropoda	Insecta	Hemiptera	Aleyrodidae			94.9	0	0	0	0	0	0	0	0	0	0	0	0	0	0	0	0	0	0	0	0	0	0	0	0	0	0	0	0	0	0	0	0	0	0	0	0	0	0	0	0	0
ESV_435718	Eukaryota	Arthropoda	Insecta	Diptera	Tachinidae	Eophyllophila	Eophyllophila elegans	93	0	0	0	0	0	0	0	0	0	0	0	0	0	0	0	0	0	0	0	0	0	0	0	0	0	0	0	0	0	0	0	0	0	0	0	0	0	0	0	0	0
ESV_435734	Eukaryota	Arthropoda	Insecta	Diptera	Cecidomyiidae			97.4	0	0	0	0	0	0	0	0	0	0	0	0	0	0	0	0	0	0	0	0	0	0	0	0	0	0	0	0	0	0	0	0	0	0	0	0	0	0	0	0	0
ESV_435785	Eukaryota	Arthropoda	Insecta	Coleoptera	Erotylidae			100	0	0	0	0	0	0	0	0	0	0	0	0	0	0	0	0	0	0	0	0	0	0	0	0	0	0	0	0	0	0	0	0	0	0	0	0	0	0	0	0	0
ESV_435819	Eukaryota	Arthropoda	Insecta	Diptera	Cecidomyiidae			93.3	0	0	0	0	0	0	0	0	0	0	0	0	0	0	0	0	0	0	0	0	0	0	0	0	0	0	0	0	0	0	0	0	0	0	0	0	0	0	0	0	0
ESV_435830	Eukaryota	Arthropoda	Insecta	Lepidoptera	Geometridae			98.1	0	0	0	0	0	0	0	0	0	0	0	0	0	0	0	0	0	0	0	0	0	0	0	0	0	0	0	0	0	0	0	0	0	0	0	0	0	0	0	0	0
ESV_435835	Eukaryota	Arthropoda	Insecta	Diptera	Cecidomyiidae			95.5	0	0	0	0	0	0	0	0	0	0	0	0	0	0	0	0	0	0	0	0	0	0	0	0	0	0	0	0	0	0	0	0	0	0	0	0	0	0	0	0	0
ESV_435840	Eukaryota	Arthropoda	Insecta	Diptera	Cecidomyiidae			94.9	0	0	0	0	0	0	0	0	0	0	0	0	0	0	0	0	0	0	0	0	0	0	0	0	0	0	0	0	0	0	0	0	0	0	0	0	0	0	0	0	0
ESV_435842	Eukaryota	Arthropoda	Insecta	Lepidoptera				96.8	0	0	0	0	0	0	0	0	0	0	0	0	0	0	0	0	0	0	0	0	0	0	0	0	0	0	0	0	0	0	0	0	0	0	0	0	0	0	0	0	0
ESV_435852	Eukaryota	Arthropoda	Insecta	Diptera	Cecidomyiidae			94.9	0	0	0	0	0	0	0	0	0	0	0	0	0	0	0	0	0	0	0	0	0	0	0	0	0	0	0	0	0	0	0	0	0	0	0	0	0	0	0	0	0
ESV_435855	Eukaryota	Arthropoda	Insecta	Lepidoptera				96.8	0	0	0	0	0	0	0	0	0	0	0	0	0	0	0	0	0	0	0	0	0	0	0	0	0	0	0	0	0	0	0	0	0	0	0	0	0	0	0	0	0
ESV_435858	Eukaryota	Arthropoda	Insecta	Diptera	Cecidomyiidae			94.6	0	0	0	0	0	0	0	0	0	0	0	0	0	0	0	0	0	0	0	0	0	0	0	0	0	0	0	0	0	0	0	0	0	0	0	0	0	0	0	0	0
ESV_435872	Eukaryota	Arthropoda	Insecta	Diptera	Chironomidae	Cladotanytarsus	Cladotanytarsus gracilistylus	100	0	0	0	0	0	0	0	0	0	0	0	0	0	0	0	0	0	0	0	0	0	0	0	0	0	0	0	0	0	0	0	0	0	0	0	0	0	0	0	0	0
ESV_435890	Eukaryota	Arthropoda	Insecta	Orthoptera	Gryllidae			97.8	0	0	0	0	0	0	0	0	0	0	0	0	0	0	0	0	0	0	0	0	0	0	0	0	0	0	0	0	0	0	0	0	0	0	0	0	0	0	0	0	0
ESV_435892	Eukaryota	Arthropoda	Insecta	Diptera	Cecidomyiidae			97.8	0	0	0	0	0	0	0	0	0	0	0	0	0	0	0	0	0	0	0	0	0	0	1	1	0	0	0	0	1	0	0	0	0	0	0	0	0	0	0	0	0
ESV_435894	Eukaryota	Arthropoda	Insecta	Diptera	Cecidomyiidae			94.9	0	0	0	0	0	0	0	0	0	0	0	0	0	0	0	0	0	0	0	0	0	0	0	0	0	0	0	0	0	0	0	0	0	0	0	0	0	0	0	0	0
ESV_435909	Eukaryota	Arthropoda	Insecta	Diptera	Cecidomyiidae			95.8	0	0	0	0	0	0	0	0	0	0	0	0	0	0	0	2	1	0	1	0	4	0	0	0	0	0	0	0	0	0	0	0	0	1	0	0	0	0	0	0	0
ESV_435911	Eukaryota	Arthropoda	Insecta	Diptera	Cecidomyiidae			92	0	0	0	0	0	0	0	0	0	0	0	0	0	0	0	0	0	0	0	0	0	0	0	0	0	0	0	0	0	0	0	0	0	0	0	0	0	0	0	0	0
ESV_435914	Eukaryota	Arthropoda	Insecta	Diptera	Cecidomyiidae			91.4	0	0	0	0	0	0	0	0	0	0	0	0	0	0	0	0	0	0	0	0	0	0	0	0	0	0	0	0	0	0	0	0	0	0	0	0	0	0	0	0	0
ESV_435918	Eukaryota	Arthropoda	Insecta	Diptera	Cecidomyiidae			94.6	0	0	0	0	0	0	0	0	0	0	0	0	0	0	0	0	0	0	0	0	0	0	0	0	0	0	0	0	0	0	0	0	0	0	0	0	0	0	0	0	0
ESV_435923	Eukaryota	Arthropoda	Insecta	Diptera	Cecidomyiidae			96.5	0	0	0	0	0	0	0	0	0	0	0	0	0	0	0	0	0	0	0	0	0	0	0	0	0	0	0	0	0	0	0	0	0	0	0	0	0	0	0	0	0
ESV_435933	Eukaryota	Arthropoda	Insecta	Diptera	Phoridae			100	0	0	0	0	0	0	0	0	0	0	0	0	0	0	0	0	0	0	0	0	0	0	0	0	0	0	0	0	0	0	0	0	0	0	0	0	0	0	0	0	0
ESV_435935	Eukaryota	Arthropoda	Insecta	Diptera	Cecidomyiidae			95.5	0	0	0	0	0	0	0	0	0	0	0	0	0	0	0	0	0	0	0	0	0	0	0	0	0	0	0	0	0	0	0	0	0	0	0	0	0	0	0	0	0
ESV_435943	Eukaryota	Arthropoda	Insecta	Diptera	Cecidomyiidae			94.9	0	0	0	0	0	0	0	0	0	0	0	0	0	0	0	0	0	0	0	0	0	0	0	0	0	0	0	0	0	0	0	0	0	0	0	0	0	0	0	0	0
ESV_435945	Eukaryota	Arthropoda	Insecta	Diptera	Cecidomyiidae			93.6	0	0	0	0	0	0	0	0	0	0	0	0	0	0	0	0	0	0	0	0	0	0	0	0	0	0	0	0	0	0	0	0	0	0	0	0	0	0	0	0	0
ESV_435951	Eukaryota	Chordata	Mammalia	Pilosa	Bradypodidae	Bradypus		100	0	0	1	0	0	0	0	0	0	0	0	0	0	0	0	0	0	0	0	0	0	0	0	0	0	0	0	0	0	0	0	0	0	0	0	0	0	0	0	0	0
ESV_435956	Eukaryota	Arthropoda	Insecta	Diptera	Cecidomyiidae			94.6	0	0	0	0	0	0	0	0	0	0	0	0	0	0	0	0	0	0	0	0	0	0	0	0	0	0	0	0	0	0	0	0	0	0	0	0	0	0	0	0	0
ESV_435962	Eukaryota	Arthropoda	Insecta	Diptera	Cecidomyiidae			95.8	0	0	0	0	0	0	0	0	0	0	0	0	0	0	0	0	0	0	0	0	0	0	0	0	0	0	0	0	0	0	0	0	0	0	0	0	0	0	0	0	0
ESV_435989	Eukaryota	Arthropoda	Insecta	Diptera	Cecidomyiidae			99	0	0	0	0	0	0	0	0	0	0	0	0	0	0	0	0	0	0	0	0	0	0	0	0	0	0	0	0	0	0	0	0	0	0	0	0	0	0	0	0	0
ESV_435996	Eukaryota	Arthropoda	Insecta	Diptera	Cecidomyiidae			95.8	0	0	0	0	0	0	0	0	0	0	0	0	0	0	0	0	0	0	0	0	0	0	0	0	0	0	0	0	0	0	0	0	0	0	0	0	0	0	0	0	0
ESV_436005	Eukaryota	Arthropoda	Insecta	Diptera	Cecidomyiidae			99	0	0	0	0	0	0	0	0	0	0	0	0	0	0	0	0	0	0	0	0	0	0	0	0	0	0	0	0	0	0	0	0	0	0	0	0	0	0	0	0	0
ESV_436007	Eukaryota	Arthropoda	Insecta	Diptera	Cecidomyiidae			95.5	0	0	0	0	0	0	0	0	0	0	0	0	0	0	0	0	0	0	0	0	0	0	0	0	0	0	0	0	0	0	0	0	0	0	0	0	0	0	0	0	0
ESV_436017	Eukaryota	Arthropoda	Insecta	Diptera	Cecidomyiidae			95.5	0	0	0	0	0	0	0	0	0	0	0	0	0	0	0	0	0	0	0	0	0	0	0	0	0	0	0	0	0	0	0	0	0	0	0	0	0	0	0	0	0
ESV_436021	Eukaryota	Arthropoda	Insecta	Diptera	Cecidomyiidae			90.7	0	0	0	0	0	0	0	0	0	0	0	0	0	0	0	0	0	0	0	0	0	0	0	0	0	0	0	0	0	0	0	0	0	0	0	0	0	0	0	0	0
ESV_436028	Eukaryota	Arthropoda	Insecta	Diptera	Cecidomyiidae			95.8	0	0	0	0	0	0	0	0	0	0	0	0	23	10	7	5	3	5	6	0	2	1	7	3	0	1	0	2	0	1	0	1	0	0	1	1	0	0	0	0	0
ESV_436041	Eukaryota	Arthropoda	Insecta	Diptera	Cecidomyiidae			92.7	0	0	0	0	0	0	0	0	0	0	0	0	0	0	0	0	0	0	0	0	0	0	0	0	0	0	0	0	0	0	0	0	0	0	0	0	0	0	0	0	0
ESV_436050	Eukaryota	Arthropoda	Arachnida	Trombidiformes	Tydeidae			86.6	0	0	0	0	0	0	0	0	0	0	0	0	0	0	0	0	0	0	0	0	0	0	0	0	0	0	0	0	0	0	0	0	0	0	0	0	0	0	0	0	0
ESV_436052	Eukaryota	Arthropoda	Insecta	Diptera	Cecidomyiidae			95.2	0	0	0	0	0	0	0	0	0	0	0	0	0	0	0	0	0	0	0	0	0	0	0	0	0	0	0	0	0	0	0	0	0	0	0	0	0	0	0	0	0
ESV_436054	Eukaryota	Arthropoda	Insecta	Diptera	Cecidomyiidae			94.9	0	0	0	0	0	0	0	0	0	0	0	0	0	0	0	0	0	0	0	0	0	0	0	0	0	0	0	0	0	0	0	0	0	0	0	0	0	0	0	0	0
ESV_436056	Eukaryota	Arthropoda	Insecta	Diptera	Cecidomyiidae			95.5	0	0	0	0	0	0	0	0	0	0	0	0	0	0	0	0	0	0	0	0	0	0	0	0	0	0	0	0	0	0	0	0	0	0	0	0	0	0	0	0	0
ESV_436060	Eukaryota	Arthropoda	Insecta	Diptera	Chironomidae	Thienemanniella		99.7	0	0	0	0	0	0	0	0	0	0	0	0	0	0	0	0	0	0	0	0	0	0	0	0	0	0	0	0	0	0	0	0	0	0	0	0	0	0	0	0	0
ESV_436061	Eukaryota	Arthropoda	Insecta	Diptera	Cecidomyiidae			93.3	0	0	0	0	0	0	0	0	0	0	0	0	0	0	0	0	0	0	0	0	0	0	0	0	0	0	0	0	0	0	0	0	0	0	0	0	0	0	0	0	0
ESV_436063	Eukaryota	Arthropoda	Insecta	Diptera	Cecidomyiidae			93.6	0	0	0	0	0	0	0	0	0	0	0	0	0	0	0	0	0	0	0	0	0	0	0	0	0	0	0	0	0	0	0	0	0	0	0	0	0	0	0	0	0
ESV_436069	Eukaryota	Arthropoda	Insecta	Diptera	Cecidomyiidae			96.5	0	0	0	0	0	0	0	0	0	0	0	0	0	0	0	0	0	0	0	0	0	0	0	0	0	0	0	0	0	0	0	0	0	0	0	0	0	0	0	0	0
ESV_436072	Eukaryota	Arthropoda	Insecta	Diptera	Cecidomyiidae			94.9	0	0	0	0	0	0	0	0	0	0	0	0	0	0	0	0	0	1	0	0	0	0	0	0	0	0	0	0	0	0	0	0	0	0	0	0	0	0	0	0	0
ESV_436076	Eukaryota	Arthropoda	Insecta	Diptera	Cecidomyiidae			95.8	0	0	0	0	0	0	0	0	0	0	0	0	0	0	0	0	0	0	0	0	0	0	0	0	0	0	0	0	0	0	0	0	0	0	0	0	0	0	0	0	0
ESV_436078	Eukaryota	Arthropoda	Insecta	Diptera	Cecidomyiidae			96.5	0	0	0	0	0	0	0	0	0	0	0	0	0	0	0	0	0	0	0	0	0	0	0	0	0	0	0	0	0	0	0	0	0	0	0	0	0	0	0	0	0
ESV_436082	Eukaryota	Arthropoda	Insecta	Diptera	Cecidomyiidae			95.5	0	0	0	0	0	0	0	0	0	0	0	0	0	0	0	0	0	0	0	0	0	0	0	0	0	0	0	0	0	0	0	0	0	0	0	0	0	0	0	0	0
ESV_436122	Eukaryota	Arthropoda	Insecta	Diptera	Psychodidae			94.2	23	1	11	0	1	2	4	2	4	7	3	3	0	0	0	0	0	0	0	0	0	0	0	0	0	0	0	0	0	0	0	0	0	0	0	0	0	0	0	0	0
ESV_436123	Eukaryota	Arthropoda	Insecta	Diptera	Cecidomyiidae			99.7	0	0	0	0	0	0	0	0	0	0	0	0	0	0	0	0	0	0	0	0	0	0	0	0	0	0	0	0	0	0	0	0	0	0	0	0	0	0	0	0	0
ESV_436124	Eukaryota	Arthropoda	Insecta	Diptera	Chironomidae			96.2	0	0	0	0	0	0	0	0	0	0	0	0	0	0	0	0	0	0	0	0	0	0	0	0	0	0	0	0	0	0	0	0	0	0	0	0	0	0	0	0	0
ESV_436129	Eukaryota	Arthropoda	Insecta	Psocodea	Liposcelididae			100	0	0	0	0	0	0	0	0	0	0	0	0	0	0	0	0	0	0	0	0	0	0	0	0	0	0	0	0	0	0	0	0	0	0	0	0	0	0	0	0	0
ESV_436132	Eukaryota	Arthropoda	Insecta	Diptera	Chironomidae			100	0	0	0	0	0	0	0	0	0	0	0	0	0	0	0	0	0	0	0	0	0	0	0	0	0	0	0	0	0	0	0	0	0	0	0	0	0	0	0	0	0
ESV_436140	Eukaryota	Arthropoda	Insecta	Lepidoptera	Geometridae	Eucyclodes	Eucyclodes subliturata	85.9	0	0	0	0	0	0	0	0	0	0	0	0	0	0	0	0	0	0	0	0	0	0	0	0	0	0	0	0	0	0	0	0	0	0	0	0	0	0	0	0	0
ESV_436166	Eukaryota	Arthropoda	Insecta	Diptera	Cecidomyiidae			97.4	0	0	0	0	0	0	0	0	0	0	0	0	0	0	0	0	0	0	0	0	0	0	0	0	0	0	0	0	0	0	0	0	0	0	0	0	0	0	0	0	0
ESV_436168	Eukaryota	Arthropoda	Insecta	Diptera	Cecidomyiidae			94.6	0	0	0	0	0	0	0	0	0	0	0	0	0	0	0	0	0	0	0	0	0	0	0	0	0	0	0	0	0	0	0	0	0	0	0	0	0	0	0	0	0
ESV_436169	Eukaryota	Arthropoda	Insecta	Diptera	Psychodidae	Psychoda		96.8	0	0	0	0	0	0	0	0	0	0	0	0	0	0	0	0	0	0	0	0	0	0	0	0	0	0	0	0	0	0	0	0	0	0	0	0	0	0	0	0	0
ESV_436174	Eukaryota	Arthropoda	Insecta	Diptera	Cecidomyiidae	Asteromyia		99.7	0	0	0	0	0	0	0	0	0	0	0	0	0	0	0	0	0	0	0	0	0	0	0	0	0	0	0	0	0	0	0	0	0	0	0	0	0	0	0	0	0
ESV_436175	Eukaryota	Arthropoda	Insecta	Lepidoptera	Geometridae	Problepsis	Problepsis apollinaria	95.2	0	0	0	0	0	0	0	0	0	0	0	0	0	0	0	0	0	0	0	0	0	0	0	0	0	0	0	0	0	0	0	0	0	0	0	0	0	0	0	0	1
ESV_436176	Eukaryota	Arthropoda	Insecta	Hymenoptera	Trichogrammatidae			91.9	0	0	0	0	0	0	0	0	0	0	0	0	0	0	0	0	0	0	0	0	0	0	0	0	0	0	0	0	0	0	0	0	0	0	0	0	0	0	0	0	0
ESV_436183	Eukaryota	Arthropoda	Insecta	Diptera	Cecidomyiidae			95.8	0	0	0	0	0	0	0	0	0	0	0	0	0	0	0	0	0	0	0	0	0	0	0	0	0	0	0	0	0	0	0	0	0	0	0	0	0	0	0	0	0
ESV_436184	Eukaryota	Arthropoda	Insecta	Hymenoptera				93.2	0	0	0	0	0	0	0	0	0	0	0	0	0	0	0	0	0	0	0	0	0	0	0	0	0	0	0	0	0	0	0	0	0	0	0	0	0	0	0	0	0
ESV_436190	Eukaryota	Arthropoda	Insecta	Hymenoptera	Trichogrammatidae			89.6	0	0	0	0	0	0	0	0	0	0	0	0	0	0	0	0	0	0	0	0	0	0	0	0	0	0	0	0	0	0	0	0	0	0	0	0	0	0	0	0	0
ESV_436197	Eukaryota	Arthropoda	Arachnida					88.2	0	0	0	0	0	0	0	0	0	0	0	0	0	0	0	0	0	0	0	0	0	0	0	0	0	0	0	0	0	0	0	0	0	0	0	0	0	0	0	0	0
ESV_436225	Eukaryota	Arthropoda	Insecta	Diptera	Cecidomyiidae			94.9	0	0	0	0	0	0	0	0	0	0	0	0	0	0	0	0	0	0	0	0	0	0	0	0	0	0	0	0	0	0	0	0	0	0	0	0	0	0	0	0	0
ESV_436241	Eukaryota	Arthropoda	Insecta	Diptera	Cecidomyiidae			93.3	0	0	0	0	0	0	0	0	0	0	0	0	0	0	0	0	0	0	0	0	0	0	0	0	0	0	0	0	0	0	0	0	0	0	0	0	0	0	0	0	0
ESV_436246	Eukaryota	Arthropoda	Insecta	Diptera	Cecidomyiidae			99	0	0	0	0	0	0	0	0	0	0	0	0	0	0	0	0	0	0	0	0	0	0	0	0	0	0	0	0	0	0	0	0	0	0	0	0	0	0	0	0	0
ESV_436250	Eukaryota	Arthropoda	Insecta					97.4	0	0	0	0	0	0	0	0	0	0	0	0	0	0	0	0	0	0	0	0	0	0	0	0	0	0	0	0	0	0	0	0	0	0	0	0	0	0	0	0	0
ESV_436257	Eukaryota	Chordata	Mammalia	Artiodactyla	Tayassuidae	Pecari	Pecari tajacu	99	0	0	0	0	0	0	0	0	0	0	0	0	0	0	0	0	0	0	0	0	0	0	0	0	0	0	0	1	0	0	0	0	0	0	0	0	0	0	0	1	0
ESV_436315	Eukaryota	Arthropoda	Insecta	Hymenoptera	Formicidae	Azteca	Azteca chartifex	100	0	0	0	0	0	0	0	0	0	0	0	0	0	0	0	0	0	0	1	0	0	0	0	0	0	0	0	2	0	2	0	0	0	2	0	8	0	1	0	0	0
ESV_436325	Eukaryota	Arthropoda	Insecta	Diptera	Phoridae			99	0	0	0	0	0	0	0	0	0	0	0	0	0	0	0	0	0	0	0	0	0	0	0	0	0	0	0	0	0	0	0	0	0	0	0	0	0	0	0	0	0
ESV_436331	Eukaryota	Arthropoda	Insecta	Diptera	Cecidomyiidae			96.2	0	0	0	0	0	0	0	0	0	0	0	0	0	0	0	0	0	0	0	0	0	0	0	0	0	0	0	0	0	0	0	0	0	0	0	0	0	0	0	0	0
ESV_436333	Eukaryota	Arthropoda	Insecta	Diptera	Cecidomyiidae			94.9	0	0	0	0	0	0	0	0	0	0	0	0	0	0	0	0	0	0	0	0	0	0	0	0	0	0	0	0	0	0	0	0	0	0	0	0	0	0	0	0	0
ESV_436334	Eukaryota	Arthropoda	Insecta	Diptera	Cecidomyiidae			92.7	0	0	0	0	0	0	0	0	0	0	0	0	0	0	0	0	0	0	0	0	0	0	0	0	0	0	0	0	0	0	0	0	0	1	0	0	0	0	0	0	0
ESV_436350	Eukaryota	Arthropoda	Insecta	Diptera	Cecidomyiidae			99.7	0	0	0	0	0	0	0	0	0	0	0	0	0	0	0	0	0	0	0	0	0	0	0	0	0	0	0	0	0	0	0	0	0	0	0	0	0	0	0	0	0
ESV_436352	Eukaryota	Arthropoda	Insecta	Diptera	Cecidomyiidae			96.8	0	0	0	0	0	0	0	0	0	0	0	0	0	0	0	0	0	0	0	0	0	0	0	0	0	0	0	0	0	0	0	0	0	0	0	0	0	0	0	0	0
ESV_436354	Eukaryota	Arthropoda	Insecta	Diptera	Cecidomyiidae			93	0	0	0	0	0	0	0	0	0	0	0	0	0	0	0	0	0	0	0	0	0	0	0	0	0	0	0	0	0	0	0	0	0	0	0	0	0	0	0	0	0
ESV_436355	Eukaryota	Arthropoda	Insecta	Diptera	Cecidomyiidae			96.5	0	0	0	0	0	0	0	0	0	0	0	0	0	0	0	0	0	0	0	0	0	0	0	0	0	0	0	0	0	0	0	0	0	0	0	0	0	0	0	0	0
ESV_436356	Eukaryota	Arthropoda	Insecta	Diptera	Cecidomyiidae			94.9	0	0	0	0	0	0	0	0	0	0	0	0	0	0	0	0	0	0	0	0	0	0	0	0	0	0	0	0	0	0	0	0	0	0	0	0	0	0	0	0	0
ESV_436359	Eukaryota	Arthropoda	Insecta	Psocodea				99.7	0	0	0	0	0	0	0	0	0	0	0	0	0	0	0	0	0	0	0	0	0	0	0	0	0	0	0	0	0	0	0	0	0	0	0	0	0	0	0	0	0
ESV_436366	Eukaryota	Arthropoda	Insecta	Diptera	Cecidomyiidae			93.2	0	0	0	0	0	0	0	0	0	0	0	0	0	0	0	0	0	0	0	0	0	0	0	0	0	0	0	0	0	0	0	0	0	0	0	0	0	0	0	0	0
ESV_436368	Eukaryota	Arthropoda	Insecta	Diptera	Cecidomyiidae			94.9	0	0	0	0	0	0	0	0	0	0	0	0	0	0	0	0	0	0	0	0	0	0	0	0	0	0	0	0	0	0	0	0	0	0	0	0	0	0	0	0	0
ESV_436373	Eukaryota	Arthropoda	Insecta	Diptera	Cecidomyiidae			96.1	0	0	0	0	0	0	0	0	0	0	0	0	0	0	0	0	0	0	0	0	0	0	0	0	1	11	1	1	0	1	0	1	0	2	0	2	0	0	0	0	0
ESV_436379	Eukaryota	Arthropoda	Insecta	Diptera	Cecidomyiidae			94.9	0	0	0	0	0	0	0	0	0	0	0	0	0	0	0	0	0	0	0	0	0	0	0	0	0	0	0	0	0	0	0	0	0	0	0	0	0	0	0	0	0
ESV_436382	Eukaryota	Arthropoda	Insecta	Diptera	Cecidomyiidae			95.8	0	0	0	0	0	0	0	0	0	0	0	0	0	0	0	0	0	0	0	0	0	0	0	0	0	0	0	0	0	0	0	0	0	0	0	0	0	0	0	0	0
ESV_436388	Eukaryota	Arthropoda	Insecta	Diptera	Cecidomyiidae			93	0	0	0	0	0	0	0	0	0	0	0	0	0	0	0	0	0	0	0	0	0	0	0	0	0	0	0	0	0	0	0	0	0	0	0	0	0	0	0	0	0
ESV_436389	Eukaryota	Arthropoda	Insecta	Diptera	Cecidomyiidae			94.9	0	0	0	0	0	0	0	0	0	0	0	0	0	0	0	0	0	0	0	0	0	0	0	0	0	0	0	0	0	0	0	0	0	0	0	0	0	0	0	0	0
ESV_436395	Eukaryota	Arthropoda	Insecta	Diptera	Cecidomyiidae			96.2	0	0	0	0	0	0	0	0	0	0	0	0	0	0	0	0	0	0	0	0	0	0	0	0	0	0	0	0	0	0	0	0	0	0	0	0	0	0	0	0	0
ESV_436403	Eukaryota	Arthropoda	Insecta	Diptera	Cecidomyiidae			93.9	0	0	0	0	0	0	0	0	0	0	0	0	0	0	0	0	0	0	0	0	0	0	0	0	0	0	0	0	0	0	0	0	0	0	0	0	0	0	0	0	0
ESV_436404	Eukaryota	Arthropoda	Insecta	Diptera	Cecidomyiidae			96.5	0	0	0	0	0	0	0	0	0	0	0	0	0	0	0	0	0	0	0	0	0	0	0	0	0	0	0	0	0	0	0	0	0	0	0	0	0	0	0	0	0
ESV_436408	Eukaryota	Arthropoda	Insecta	Diptera				99.7	0	0	0	0	0	0	0	0	0	0	0	0	0	0	0	0	0	0	0	0	0	0	0	0	0	0	0	0	0	0	0	0	0	0	0	0	0	0	0	0	0
ESV_436411	Eukaryota	Arthropoda	Insecta					86.5	0	0	0	0	0	0	0	0	0	0	0	0	0	0	0	0	0	0	0	0	0	0	0	0	0	0	0	0	0	0	0	0	0	0	0	0	0	0	0	0	0
ESV_436417	Eukaryota	Arthropoda	Insecta	Diptera	Cecidomyiidae			93.9	0	0	0	0	0	0	0	0	0	0	0	0	0	0	0	0	0	0	0	0	0	0	0	0	0	0	0	0	0	0	0	0	0	0	0	0	0	0	0	0	0
ESV_436425	Eukaryota	Arthropoda	Insecta	Psocodea	Caeciliusidae			99.7	0	0	0	0	0	0	0	0	0	0	0	0	0	0	0	0	0	0	0	0	0	0	0	0	0	0	0	0	0	0	0	0	0	0	0	0	0	0	0	0	0
ESV_436429	Eukaryota	Arthropoda	Insecta	Hemiptera				99.4	0	0	0	0	0	0	0	0	0	0	0	0	0	1	14	0	0	0	0	0	0	3	0	0	0	0	0	0	0	0	0	0	0	0	0	0	0	0	0	0	0
ESV_436448	Eukaryota	Arthropoda	Insecta	Hemiptera	Coccidae	Coccus	Coccus hesperidum	100	0	0	0	0	0	0	0	0	0	0	0	0	0	0	0	0	0	0	0	0	0	0	0	0	0	0	0	0	0	0	0	0	0	0	0	0	0	0	0	0	0
ESV_436459	Eukaryota	Arthropoda	Insecta	Diptera	Cecidomyiidae			93	0	0	0	0	0	0	0	0	0	0	0	0	0	0	0	0	0	0	0	0	0	0	0	0	0	0	0	0	0	0	0	0	0	0	0	0	0	0	0	0	0
ESV_436461	Eukaryota	Arthropoda	Insecta	Lepidoptera	Gracillariidae	Caloptilia	Caloptilia mwamba	93.3	0	0	0	0	0	0	0	0	0	0	0	0	0	0	0	0	0	0	0	0	0	0	0	0	0	0	0	0	0	0	0	0	0	0	0	0	0	0	0	0	0
ESV_436469	Eukaryota	Arthropoda	Insecta	Diptera	Cecidomyiidae			94.9	0	0	0	0	0	0	0	0	0	0	0	0	0	0	0	0	0	0	0	0	0	0	0	0	0	0	0	0	0	0	0	0	0	0	0	0	0	0	0	0	0
ESV_436476	Eukaryota	Arthropoda	Insecta	Diptera	Cecidomyiidae			92.7	0	0	0	0	0	0	0	0	0	0	0	0	0	0	0	0	0	0	0	0	0	0	0	0	0	0	0	0	0	1	0	0	0	0	0	0	0	0	0	0	0
ESV_436478	Eukaryota	Arthropoda	Insecta	Diptera	Cecidomyiidae			95.5	0	0	0	0	0	0	0	0	0	0	0	0	0	0	0	0	0	0	0	0	0	0	0	0	0	0	0	0	0	0	0	0	0	0	0	0	0	0	0	0	0
ESV_436484	Eukaryota	Arthropoda	Insecta	Diptera	Cecidomyiidae			94.9	0	0	0	0	0	0	0	0	0	0	0	0	0	0	0	0	0	0	0	0	0	0	0	0	0	0	0	0	0	0	0	0	0	0	0	0	0	0	0	0	0
ESV_436490	Eukaryota	Arthropoda	Insecta	Diptera	Cecidomyiidae			94.9	0	0	0	0	0	0	0	0	0	0	0	0	0	0	0	0	0	0	0	0	0	0	0	0	0	0	0	0	0	0	0	0	0	0	0	0	0	0	0	0	0
ESV_436496	Eukaryota	Arthropoda	Insecta	Diptera	Cecidomyiidae			95.2	0	0	0	0	0	0	0	0	0	0	0	0	0	0	0	0	0	0	0	0	0	0	0	0	0	0	0	0	0	0	0	0	0	0	0	0	0	0	0	0	0
ESV_436503	Eukaryota	Arthropoda	Insecta	Diptera	Cecidomyiidae			95.5	0	0	0	0	0	0	0	0	0	0	0	0	0	0	0	0	0	0	0	0	0	0	0	0	0	0	0	0	0	0	0	0	0	0	0	0	0	0	0	0	0
ESV_436504	Eukaryota	Arthropoda	Insecta	Diptera	Cecidomyiidae			94.6	0	0	0	0	0	0	0	0	0	0	0	0	0	0	0	0	0	0	0	0	0	0	0	0	0	0	0	0	0	0	0	0	0	0	0	0	0	0	0	0	0
ESV_436508	Eukaryota	Arthropoda	Insecta	Diptera	Cecidomyiidae			98.4	0	0	0	0	0	0	0	0	0	0	0	0	0	0	0	0	0	0	0	0	0	0	0	0	0	0	0	0	0	0	0	0	0	0	0	0	0	0	0	0	0
ESV_436512	Eukaryota	Arthropoda	Insecta	Diptera	Cecidomyiidae			94.9	0	0	0	0	0	0	0	0	0	0	0	0	0	0	0	0	0	0	0	0	0	0	0	0	0	0	0	0	0	0	0	0	0	0	0	0	0	0	0	0	0
ESV_436517	Eukaryota	Arthropoda	Insecta	Diptera	Cecidomyiidae			93.9	0	0	0	0	0	0	0	0	0	0	0	0	0	0	0	0	0	0	0	0	0	0	0	0	0	0	0	0	0	0	0	0	0	0	0	0	0	0	0	0	0
ESV_436527	Eukaryota	Arthropoda	Insecta	Diptera	Cecidomyiidae			95.5	0	0	0	0	0	0	0	0	0	0	0	0	0	0	0	0	0	0	0	0	0	0	0	0	0	0	0	0	0	0	0	0	0	0	0	0	0	0	0	0	0
ESV_436528	Eukaryota	Arthropoda	Insecta	Lepidoptera	Nepticulidae	Muhabbetana	Muhabbetana royenicola	97.8	0	0	0	0	0	0	0	0	0	0	0	0	0	0	0	0	0	0	0	0	0	0	0	0	0	0	0	0	0	0	0	0	0	0	0	0	0	0	0	0	0
ESV_436531	Eukaryota	Arthropoda	Insecta	Diptera	Cecidomyiidae			94.6	0	0	0	0	0	0	0	0	0	0	0	0	0	0	0	0	0	0	0	0	0	0	0	0	0	0	0	0	0	0	0	0	0	0	0	0	0	0	0	0	0
ESV_436541	Eukaryota	Arthropoda	Insecta	Lepidoptera	Geometridae	Nemoria	Nemoria leptalea	93.6	0	0	0	0	0	0	0	0	0	0	0	0	0	0	0	0	0	0	0	0	0	0	0	0	0	0	0	0	0	0	0	0	0	0	0	0	0	0	0	0	0
ESV_436544	Eukaryota	Arthropoda	Insecta	Diptera	Cecidomyiidae			94.9	0	0	0	0	0	0	0	0	0	0	0	0	0	0	0	0	0	0	0	0	0	0	0	0	0	0	0	0	0	0	0	0	0	0	0	0	0	0	0	0	0
ESV_436552	Eukaryota	Arthropoda	Insecta	Diptera	Cecidomyiidae			95.8	0	0	0	0	0	0	0	0	0	0	0	0	0	0	0	0	0	0	0	0	0	0	0	0	0	0	0	0	0	0	0	0	0	0	0	0	0	0	0	0	0
ESV_436554	Eukaryota	Arthropoda	Insecta	Lepidoptera				97.1	0	0	0	0	0	0	0	0	0	0	0	0	0	0	0	0	0	0	0	0	0	0	0	0	0	0	0	0	0	0	0	0	0	0	0	0	0	0	0	0	0
ESV_436566	Eukaryota	Arthropoda	Insecta	Diptera	Cecidomyiidae			93.9	0	0	0	0	0	0	0	0	0	0	0	0	0	0	0	0	0	0	0	0	0	0	0	0	0	0	0	0	0	0	0	0	0	0	0	0	0	0	0	0	0
ESV_436573	Eukaryota	Arthropoda	Insecta	Diptera	Cecidomyiidae			95.5	0	0	0	0	0	0	0	0	0	0	0	0	0	0	0	0	0	0	0	0	0	0	0	0	0	0	0	0	0	0	0	0	0	0	0	0	0	0	0	0	0
ESV_436576	Eukaryota	Arthropoda	Insecta	Diptera	Cecidomyiidae			96.5	0	0	0	0	0	0	0	0	0	0	0	0	0	0	0	0	0	0	0	0	0	0	0	0	0	0	0	0	0	0	0	0	0	0	0	0	0	0	0	0	0
ESV_436592	Eukaryota	Arthropoda	Insecta	Diptera	Cecidomyiidae			95.2	0	0	0	0	0	0	0	0	0	0	0	0	0	0	0	0	0	0	0	0	0	0	0	0	0	0	0	0	0	0	0	0	0	0	0	0	0	0	0	0	0
ESV_436604	Eukaryota	Arthropoda	Insecta	Diptera	Cecidomyiidae			94.9	0	0	0	0	0	0	0	0	0	0	0	0	0	0	0	0	0	0	0	0	0	0	0	0	0	0	0	0	0	0	0	0	0	0	0	0	0	0	0	0	0
ESV_436607	Eukaryota	Arthropoda	Insecta	Diptera	Cecidomyiidae			95.8	0	0	0	0	0	0	0	0	0	0	0	0	0	0	0	0	0	0	0	0	0	0	0	0	0	0	0	0	0	0	0	0	0	0	0	0	0	0	0	0	0
ESV_436608	Eukaryota	Arthropoda	Insecta	Diptera	Cecidomyiidae			93.9	0	0	0	0	0	0	0	0	0	0	0	0	0	0	0	0	0	0	0	0	0	0	0	0	0	0	0	0	0	0	0	0	0	0	0	0	0	0	0	0	0
ESV_436614	Eukaryota	Arthropoda	Insecta	Hymenoptera	Scelionidae			97	0	0	0	0	0	0	0	0	0	0	0	0	0	0	0	0	0	0	0	0	0	0	0	0	0	0	0	0	0	0	0	0	0	0	0	0	0	0	0	0	0
ESV_436620	Eukaryota	Arthropoda	Insecta	Diptera	Cecidomyiidae			94.6	0	0	0	0	0	0	0	0	0	0	0	0	0	0	0	0	0	0	0	0	0	0	0	0	0	0	0	0	0	0	0	0	0	0	0	0	0	0	0	0	0
ESV_436637	Eukaryota	Arthropoda	Insecta	Diptera	Cecidomyiidae			93.9	0	0	0	0	0	0	0	0	0	0	0	0	0	0	0	0	0	0	0	0	0	0	0	0	0	0	0	0	0	0	0	0	0	0	0	0	0	0	0	0	0
ESV_436649	Eukaryota	Arthropoda	Insecta	Lepidoptera	Autostichidae	Oecia	Oecia oecophila	96.2	0	0	0	0	0	0	0	0	0	0	0	0	0	0	0	0	0	0	0	0	0	0	0	0	0	0	0	0	0	0	0	0	0	0	0	0	0	0	0	0	0
ESV_436663	Eukaryota	Arthropoda	Insecta	Diptera	Cecidomyiidae			96.5	0	0	0	0	0	0	0	0	0	0	0	0	0	0	0	0	0	0	0	0	0	0	0	0	0	0	0	0	0	0	0	0	0	0	0	0	0	0	0	0	0
ESV_436664	Eukaryota	Arthropoda	Insecta	Diptera	Cecidomyiidae			94.2	0	0	0	0	0	0	0	0	0	0	0	0	0	0	0	0	0	0	0	0	0	0	0	0	0	0	0	0	0	0	0	0	0	0	0	0	0	0	0	0	0
ESV_436665	Eukaryota	Arthropoda	Insecta	Blattodea	Ectobiidae			99.4	0	0	0	0	0	0	0	0	0	0	0	0	0	0	0	0	0	0	0	0	0	0	0	0	0	0	0	0	0	0	0	0	0	0	0	0	0	0	0	0	0
ESV_436682	Eukaryota	Arthropoda	Insecta	Diptera	Phoridae			100	0	0	0	0	0	0	0	0	0	0	0	0	0	0	0	0	0	0	0	0	0	0	0	0	0	0	0	0	0	0	0	0	0	0	0	0	0	0	0	0	0
ESV_436687	Eukaryota	Arthropoda	Insecta					96.2	0	0	0	0	0	0	0	0	0	0	0	0	0	0	0	0	0	0	0	0	0	0	0	0	0	0	0	0	0	0	0	0	0	0	0	0	0	0	0	0	0
ESV_436691	Eukaryota	Arthropoda	Insecta	Coleoptera	Curculionidae	Curculio	Curculio sp. 2 ZM-2022a	94.6	0	0	0	0	0	0	0	0	0	0	0	0	0	0	0	0	0	0	0	0	0	0	0	0	0	0	0	0	0	0	0	0	0	0	0	0	0	0	0	0	0
ESV_436693	Eukaryota	Arthropoda	Insecta	Diptera	Cecidomyiidae			96.2	0	0	0	0	0	0	0	0	0	0	0	0	0	0	0	0	0	0	0	0	0	0	0	0	0	0	0	0	0	0	0	0	0	0	0	0	0	0	0	0	0
ESV_436696	Eukaryota	Arthropoda	Insecta	Diptera	Cecidomyiidae			94.6	0	0	0	0	0	0	0	0	0	0	0	0	0	0	0	0	0	0	0	0	0	0	0	0	0	0	0	0	0	0	0	0	0	0	0	0	0	0	0	0	0
ESV_436698	Eukaryota	Arthropoda	Insecta	Diptera	Cecidomyiidae			95.5	0	0	0	0	0	0	0	0	0	0	0	0	0	0	0	0	0	0	0	0	0	0	0	0	0	0	0	0	0	0	0	0	0	0	0	0	0	0	0	0	0
ESV_436706	Eukaryota	Arthropoda	Insecta	Diptera	Cecidomyiidae			94.6	0	0	0	0	0	0	0	0	0	0	0	0	0	0	0	0	0	0	0	0	0	0	0	0	0	0	0	0	0	0	0	0	0	0	0	0	0	0	0	0	0
ESV_436707	Eukaryota	Arthropoda	Insecta	Diptera	Cecidomyiidae			96.2	0	0	0	0	0	0	0	0	0	0	0	0	0	0	0	0	0	0	0	0	0	0	0	0	0	0	0	0	0	0	0	0	0	0	0	0	0	0	0	0	0
ESV_436713	Eukaryota	Arthropoda	Insecta	Diptera	Cecidomyiidae			92.7	0	0	0	0	0	0	0	0	0	0	0	0	0	0	0	0	0	0	0	0	0	0	0	0	0	0	0	0	0	0	0	0	0	0	0	0	0	0	0	0	0
ESV_436719	Eukaryota	Arthropoda	Insecta	Diptera	Cecidomyiidae			95.2	0	0	0	0	0	0	0	0	0	0	0	0	0	0	0	0	0	0	0	0	0	0	0	0	0	0	0	0	0	0	0	0	0	0	0	0	0	0	0	0	0
ESV_436726	Eukaryota	Arthropoda	Insecta	Diptera	Cecidomyiidae			95.5	0	0	0	0	0	0	0	0	0	0	0	0	0	0	0	0	0	0	0	0	0	0	0	0	0	0	0	0	0	0	0	0	0	0	0	0	0	0	0	0	0
ESV_436734	Eukaryota	Arthropoda	Insecta	Diptera	Cecidomyiidae			97.1	0	0	0	0	0	0	0	0	0	0	0	0	0	0	0	0	0	0	0	0	0	0	0	0	0	0	0	0	0	0	0	0	0	0	0	0	0	0	0	0	0
ESV_436739	Eukaryota	Arthropoda	Insecta	Diptera	Cecidomyiidae			93.6	0	0	0	0	0	0	0	0	0	0	0	0	0	0	0	0	0	0	0	0	0	0	0	0	0	0	0	0	0	0	0	0	0	0	0	0	0	0	0	0	0
ESV_436750	Eukaryota	Arthropoda	Insecta					95.5	0	0	0	0	0	0	0	0	0	0	0	0	0	0	0	0	0	0	0	0	0	0	0	0	0	0	0	0	0	0	0	0	0	0	0	0	0	0	0	0	0
ESV_436760	Eukaryota	Arthropoda	Insecta	Diptera	Cecidomyiidae			92.7	0	0	0	0	0	0	0	0	0	0	0	0	0	0	0	0	0	0	0	0	0	0	0	0	0	0	0	0	0	0	0	0	0	0	0	0	0	0	0	0	0
ESV_436770	Eukaryota	Arthropoda	Insecta	Diptera	Cecidomyiidae			100	0	0	0	0	0	0	0	0	0	0	0	0	0	0	0	0	0	0	0	0	0	0	0	0	0	0	0	0	0	0	0	0	0	0	0	0	0	0	0	0	0
ESV_436821	Eukaryota	Arthropoda	Insecta	Diptera	Cecidomyiidae			93.3	0	0	0	0	0	0	0	0	0	0	0	0	0	0	0	0	0	0	0	0	0	0	0	0	0	0	0	0	0	0	0	0	0	0	0	0	0	0	0	0	0
ESV_436826	Eukaryota	Arthropoda	Insecta	Diptera	Cecidomyiidae			92.3	0	0	0	0	0	0	0	0	0	0	0	0	0	0	0	0	0	0	0	0	0	0	0	0	0	0	0	0	0	0	0	0	0	0	0	0	0	0	0	0	0
ESV_436836	Eukaryota	Arthropoda	Insecta	Diptera	Cecidomyiidae			92	0	0	0	0	0	0	0	0	0	0	0	0	0	0	0	0	0	0	0	0	0	0	0	0	0	0	0	0	0	0	0	0	0	0	0	0	0	0	0	0	0
ESV_436837	Eukaryota	Arthropoda	Insecta	Diptera	Cecidomyiidae			94.9	0	0	0	0	0	0	0	0	0	0	0	0	0	0	0	0	0	0	0	0	0	0	0	0	0	0	0	0	0	0	0	0	0	0	0	0	0	0	0	0	0
ESV_436848	Eukaryota	Arthropoda	Insecta					87.5	0	0	0	0	0	0	0	0	0	0	0	0	0	0	0	0	0	0	0	0	0	0	0	0	0	0	0	0	0	0	0	0	0	0	0	0	0	0	0	0	0
ESV_436852	Eukaryota	Arthropoda	Insecta	Diptera	Cecidomyiidae			95.2	0	0	0	0	0	0	0	0	0	0	0	0	0	0	0	0	0	0	0	0	0	0	0	0	0	2	0	0	0	1	1	1	0	1	0	0	0	0	0	0	0
ESV_436858	Eukaryota	Arthropoda	Insecta	Diptera	Cecidomyiidae			93.6	0	0	0	0	0	0	0	0	0	0	0	0	0	0	0	0	0	0	0	0	0	0	0	0	0	0	0	0	0	0	0	0	0	0	0	0	0	0	0	0	0
ESV_436867	Eukaryota	Arthropoda	Insecta	Diptera	Cecidomyiidae			94.6	0	0	0	0	0	0	0	0	0	0	0	0	0	0	0	0	0	0	0	0	0	0	0	0	0	0	0	0	0	0	0	0	0	0	0	0	0	0	0	0	0
ESV_436877	Eukaryota	Arthropoda	Insecta	Diptera	Cecidomyiidae			97.8	0	0	0	0	0	0	0	0	0	0	0	0	0	0	0	0	0	0	0	0	0	0	0	0	0	0	0	0	0	0	0	0	0	0	0	0	0	0	0	0	0
ESV_436878	Eukaryota	Arthropoda	Insecta	Diptera	Cecidomyiidae			94.6	0	0	0	0	0	0	0	0	0	0	0	0	0	0	0	0	0	0	0	0	0	0	0	0	0	0	0	0	0	0	0	0	0	0	0	0	0	0	0	0	0
ESV_436882	Eukaryota	Arthropoda	Insecta	Diptera	Cecidomyiidae			93	0	0	0	0	0	0	0	0	0	0	0	0	0	0	0	0	0	0	0	0	0	0	0	0	0	0	0	0	0	0	0	0	0	0	0	0	0	0	0	0	0
ESV_436896	Eukaryota	Arthropoda	Insecta	Diptera	Cecidomyiidae			94.2	0	0	0	0	0	0	0	0	0	0	0	0	0	0	0	0	0	0	0	0	0	0	0	0	0	0	0	0	0	0	0	0	0	0	0	0	0	0	0	0	0
ESV_436901	Eukaryota	Arthropoda	Arachnida	Trombidiformes	Tydeidae			85.3	0	0	0	0	0	0	0	0	0	0	0	0	0	0	0	0	0	7	0	3	0	1	0	3	0	0	0	0	0	0	0	0	0	0	0	0	0	0	0	0	0
ESV_436910	Eukaryota	Arthropoda	Insecta	Diptera	Cecidomyiidae			93	0	0	0	0	0	0	0	0	0	0	0	0	0	0	0	0	0	0	0	0	0	0	0	0	0	0	0	0	0	0	0	0	0	0	0	0	0	0	0	0	0
ESV_436916	Eukaryota	Chordata	Aves	Psittaciformes	Psittacidae	Amazona	Amazona autumnalis	100	0	0	0	0	0	0	0	0	0	0	0	0	0	0	0	0	0	0	0	0	0	0	0	0	0	0	0	0	0	0	0	0	0	0	0	0	0	1	0	0	0
ESV_436932	Eukaryota	Arthropoda	Arachnida	Trombidiformes	Eriophyidae	Aceria	Aceria tosichella	100	0	0	0	0	0	0	0	0	0	0	0	0	0	0	0	0	0	0	0	0	0	0	0	0	0	0	0	0	0	0	0	0	0	0	0	0	0	0	0	0	0
ESV_436936	Eukaryota	Arthropoda	Insecta	Diptera	Cecidomyiidae			94.2	0	0	0	0	0	0	0	0	0	0	0	0	0	0	0	0	0	0	0	0	0	0	0	0	0	0	0	0	0	0	0	0	0	0	0	0	0	0	0	0	0
ESV_436939	Eukaryota	Arthropoda	Insecta	Diptera	Cecidomyiidae			96.2	0	0	0	0	0	0	0	0	0	0	0	0	0	0	0	0	0	0	0	0	0	0	0	0	0	0	0	0	0	0	0	0	0	0	0	0	0	0	0	0	0
ESV_436943	Eukaryota	Arthropoda	Insecta	Thysanoptera	Phlaeothripidae	Haplothrips	Haplothrips tenuipennis	86.3	0	0	0	0	0	0	0	0	6	0	0	0	0	0	0	1	0	0	0	0	0	0	0	0	0	0	0	0	0	0	0	0	0	0	0	0	0	0	1	110	0
ESV_436970	Eukaryota	Arthropoda	Insecta	Diptera	Cecidomyiidae			93	0	0	0	0	0	0	0	0	0	0	0	0	0	0	0	0	0	0	0	0	0	0	0	0	0	0	0	0	0	0	0	0	0	0	0	0	0	0	0	0	0
ESV_436971	Eukaryota	Arthropoda	Insecta	Diptera	Cecidomyiidae			96.2	0	0	0	0	0	0	0	0	0	0	0	0	1	0	0	0	0	0	0	0	0	0	0	0	0	0	0	0	0	0	0	0	0	0	0	0	0	0	0	0	0
ESV_436986	Eukaryota	Arthropoda	Insecta	Diptera	Cecidomyiidae			95.5	0	0	0	0	0	0	0	0	0	0	0	0	0	0	0	0	0	0	0	0	0	0	0	0	0	0	0	0	0	0	0	0	0	0	0	0	0	0	0	0	0
ESV_436993	Eukaryota	Arthropoda	Insecta	Lepidoptera				96.8	0	0	0	0	0	0	0	0	0	0	0	0	0	0	0	0	0	0	0	0	0	0	0	0	0	0	0	0	0	0	0	0	0	0	0	0	0	0	0	0	0
ESV_436994	Eukaryota	Arthropoda	Insecta	Hemiptera	Pentatomidae			90.7	0	0	0	0	0	0	0	0	0	0	0	0	0	0	0	0	0	0	0	0	0	0	0	0	0	0	0	0	0	0	0	0	0	0	0	0	0	0	0	0	0
ESV_436996	Eukaryota	Arthropoda	Insecta	Diptera	Cecidomyiidae			93.3	0	0	0	0	0	0	0	0	0	0	0	0	0	0	0	0	0	0	0	0	0	0	0	0	0	0	0	0	0	0	0	0	0	0	0	0	0	0	0	0	0
ESV_436998	Eukaryota	Arthropoda	Insecta	Diptera	Cecidomyiidae			93.3	0	0	0	0	0	0	0	0	0	0	0	0	0	0	0	0	0	0	0	0	0	0	0	0	0	0	0	0	0	0	0	0	0	0	0	0	0	0	0	0	0
ESV_437001	Eukaryota	Arthropoda	Insecta	Diptera	Cecidomyiidae			95.5	0	0	0	0	0	0	0	0	0	0	0	0	0	0	0	0	1	0	0	0	0	0	0	0	0	0	0	0	0	0	0	0	0	0	0	0	0	0	0	0	0
ESV_437002	Eukaryota	Arthropoda	Insecta	Diptera	Cecidomyiidae			94.6	0	0	0	0	0	0	0	0	0	0	0	0	0	0	0	0	0	0	0	0	0	0	0	0	0	0	0	0	0	0	0	0	0	0	0	0	0	0	0	0	0
ESV_437005	Eukaryota	Arthropoda	Insecta	Diptera	Cecidomyiidae			96.2	0	0	0	0	0	0	0	0	0	0	0	0	54	12	12	11	6	7	10	2	10	16	20	7	0	1	2	0	0	1	1	1	0	0	2	0	0	0	0	0	0
ESV_437007	Eukaryota	Arthropoda	Insecta	Diptera	Cecidomyiidae			93.6	0	0	0	0	0	0	0	0	0	0	0	0	0	0	0	0	0	0	0	0	0	0	0	0	0	0	0	0	0	0	0	0	0	0	0	0	0	0	0	0	0
ESV_437016	Eukaryota	Arthropoda	Insecta	Diptera				91.1	0	0	0	0	0	0	0	0	0	0	0	0	0	0	0	0	0	0	0	0	0	0	0	0	0	0	0	0	0	0	0	0	0	0	0	0	0	0	0	0	0
ESV_437049	Eukaryota	Arthropoda	Insecta	Diptera	Cecidomyiidae			94.9	0	0	0	0	0	0	0	0	0	0	0	0	0	0	0	0	0	0	0	0	0	0	0	0	0	0	0	0	0	0	0	0	0	0	0	0	0	0	0	0	0
ESV_437055	Eukaryota	Arthropoda	Insecta	Diptera	Cecidomyiidae			93.9	0	0	0	0	0	0	0	0	0	0	0	0	0	0	0	0	0	0	0	0	0	0	0	0	1	0	0	1	0	67	0	0	0	0	0	0	0	0	0	0	0
ESV_437058	Eukaryota	Arthropoda	Insecta	Diptera	Cecidomyiidae			96.8	0	0	0	0	0	0	0	0	0	0	0	0	0	0	0	0	0	0	0	0	0	0	0	0	0	0	0	0	0	0	0	0	0	0	0	0	0	0	0	0	0
ESV_437066	Eukaryota	Arthropoda	Insecta	Diptera	Cecidomyiidae			92.3	0	0	0	0	0	0	0	0	0	0	0	0	0	0	0	0	0	0	0	0	0	0	0	0	0	0	0	0	0	0	0	0	0	0	0	0	0	0	0	0	0
ESV_437070	Eukaryota	Arthropoda	Insecta	Diptera	Cecidomyiidae			96.5	0	0	0	0	0	0	0	0	0	0	0	0	0	0	0	0	0	0	0	0	0	0	0	0	0	0	0	0	0	0	0	0	0	0	0	0	0	0	0	0	0
ESV_437074	Eukaryota	Arthropoda	Insecta	Diptera	Cecidomyiidae			94.9	0	0	0	0	0	0	0	0	0	0	0	0	0	0	0	0	0	0	0	0	0	0	0	0	0	0	0	0	0	0	0	0	0	0	0	0	0	0	0	0	0
ESV_437075	Eukaryota	Arthropoda	Insecta					92.7	0	0	0	0	0	0	0	0	0	0	0	0	0	0	0	0	0	0	0	0	0	0	0	0	0	0	0	0	0	0	0	0	0	0	0	0	0	0	0	0	0
ESV_437076	Eukaryota	Arthropoda	Insecta	Diptera	Cecidomyiidae			94.2	0	0	0	0	0	0	0	0	0	0	0	0	0	0	0	0	0	0	0	0	0	0	0	0	0	0	0	0	0	0	0	0	0	0	0	0	0	0	0	0	0
ESV_437079	Eukaryota	Arthropoda	Insecta	Diptera	Cecidomyiidae			96.2	0	0	0	0	0	0	0	0	0	0	0	0	0	0	0	0	0	0	0	0	0	0	0	0	0	0	0	0	0	0	0	0	0	0	0	0	0	0	0	0	0
ESV_437094	Eukaryota	Arthropoda	Insecta	Hymenoptera	Formicidae	Solenopsis	Solenopsis sp. MAS004	99	0	0	0	0	0	0	0	0	0	0	0	0	0	0	0	0	0	0	0	0	0	0	0	0	0	0	0	0	0	0	0	0	0	0	0	0	0	0	0	0	0
ESV_437095	Eukaryota	Arthropoda	Insecta	Diptera	Cecidomyiidae			95.2	0	0	0	0	0	0	0	0	0	0	0	0	0	0	0	0	0	0	0	0	0	0	0	0	0	0	0	0	0	0	0	0	0	0	0	0	0	0	0	0	0
ESV_437115	Eukaryota	Arthropoda	Insecta	Diptera	Cecidomyiidae			93.3	0	0	0	0	0	0	0	0	0	0	0	0	0	0	0	0	0	0	0	0	0	0	0	0	0	0	0	0	0	0	0	0	0	0	0	0	0	0	0	0	0
ESV_437125	Eukaryota	Arthropoda	Insecta	Diptera	Cecidomyiidae			93.9	0	0	0	0	0	0	0	0	0	0	0	0	0	0	0	0	0	0	0	0	0	0	0	0	0	0	0	0	0	0	0	0	0	0	0	0	0	0	0	0	0
ESV_437129	Eukaryota	Arthropoda	Insecta	Diptera	Cecidomyiidae			98.7	0	0	0	0	0	0	0	0	0	0	0	0	0	0	0	0	0	0	0	0	0	0	0	0	0	0	0	0	0	0	0	0	0	0	0	0	0	0	0	0	0
ESV_437131	Eukaryota	Arthropoda	Insecta	Diptera	Cecidomyiidae			95.5	0	0	0	0	0	0	0	0	0	0	0	0	0	0	0	0	0	0	0	0	0	0	0	0	0	0	0	0	0	0	0	0	0	0	0	0	0	0	0	0	0
ESV_437132	Eukaryota	Arthropoda	Insecta	Diptera	Cecidomyiidae			90.8	0	0	0	0	0	0	0	0	0	0	0	0	0	0	0	0	0	0	0	0	0	0	0	0	0	0	0	0	0	0	0	0	0	0	0	0	0	0	0	0	0
ESV_437138	Eukaryota	Arthropoda	Insecta	Diptera	Cecidomyiidae			95.5	0	0	0	0	0	0	0	0	0	0	0	0	0	0	0	0	0	0	0	0	0	0	0	0	0	0	0	0	0	0	0	0	0	0	0	0	0	0	0	0	0
ESV_437139	Eukaryota	Arthropoda	Insecta	Diptera	Cecidomyiidae			93.9	0	0	0	0	0	0	0	0	0	0	0	0	0	0	0	0	0	0	0	0	0	0	0	0	0	0	0	0	0	0	0	0	0	0	0	0	0	0	0	0	0
ESV_437140	Eukaryota	Arthropoda	Insecta	Diptera	Cecidomyiidae			96.2	0	0	0	0	0	0	0	0	0	0	0	0	0	0	0	0	0	0	0	0	0	0	0	0	0	0	0	0	0	0	0	0	0	0	0	0	0	0	0	0	0
ESV_437144	Eukaryota	Arthropoda	Insecta	Diptera	Cecidomyiidae			94.2	0	0	0	0	0	0	0	0	0	0	0	0	0	0	0	0	0	0	0	0	0	0	0	0	0	0	0	0	0	0	0	0	0	0	0	0	0	0	0	0	0
ESV_437146	Eukaryota	Arthropoda	Insecta	Diptera	Cecidomyiidae			95.5	0	0	0	0	0	0	0	0	0	0	0	0	0	0	0	0	0	0	0	0	0	0	0	0	0	0	0	0	0	0	0	0	0	0	0	0	0	0	0	0	0
ESV_437150	Eukaryota	Arthropoda	Insecta	Diptera	Cecidomyiidae			97.4	0	0	0	0	0	0	0	0	0	0	0	0	0	0	0	0	0	0	0	0	0	0	0	0	0	0	0	0	0	0	0	0	0	0	0	0	0	0	0	0	0
ESV_437156	Eukaryota	Arthropoda	Insecta	Diptera	Cecidomyiidae			92	0	0	0	0	0	0	0	0	0	0	0	0	0	0	0	0	0	0	0	0	0	0	0	0	0	0	0	0	0	0	0	0	0	0	0	0	0	0	0	0	0
ESV_437157	Eukaryota	Arthropoda	Insecta	Diptera	Cecidomyiidae			92.3	0	0	0	0	0	0	0	0	0	0	0	0	0	0	0	0	0	0	0	0	0	0	0	0	0	0	0	0	0	0	0	0	0	0	0	0	0	0	0	0	0
ESV_437164	Eukaryota	Arthropoda	Insecta	Diptera	Cecidomyiidae			93.9	0	0	0	0	0	0	0	0	0	0	0	0	0	0	0	0	0	0	0	0	0	0	0	0	0	0	0	0	0	0	0	0	0	0	0	0	0	0	0	0	0
ESV_437169	Eukaryota	Arthropoda	Insecta	Diptera	Cecidomyiidae			90.7	0	0	0	0	0	0	0	0	0	0	0	0	0	0	0	0	0	0	0	0	0	0	0	0	0	0	0	0	0	0	0	0	0	0	0	0	0	0	0	0	0
ESV_437177	Eukaryota	Arthropoda	Insecta	Diptera	Cecidomyiidae			97.1	0	0	0	0	0	0	0	0	0	0	0	0	0	0	0	0	0	0	0	0	0	0	0	0	0	0	0	0	0	0	0	0	0	0	0	0	0	0	0	0	0
ESV_437210	Eukaryota	Arthropoda	Insecta	Diptera	Cecidomyiidae			97.1	0	0	0	0	0	0	0	0	0	0	0	0	0	1	1	0	1	5	1	1	2	1	2	0	0	1	0	0	0	0	0	0	0	0	0	0	0	0	0	0	0
ESV_437228	Eukaryota	Arthropoda	Insecta	Diptera	Cecidomyiidae			96.8	0	0	0	0	0	0	0	0	0	0	0	0	0	0	1	0	0	0	0	0	0	1	0	2	0	0	0	0	0	0	0	0	0	0	0	0	0	0	0	0	0
ESV_437245	Eukaryota	Arthropoda	Insecta	Diptera	Cecidomyiidae			99	0	0	0	0	0	0	0	0	0	0	0	0	0	0	0	0	0	0	0	0	0	0	0	0	0	0	0	0	0	0	0	0	0	0	0	0	0	0	0	0	0
ESV_437255	Eukaryota	Arthropoda	Arachnida	Ixodida	Ixodidae	Amblyomma	Amblyomma oblongoguttatum	100	0	0	0	0	1	0	0	0	0	23	0	0	0	0	0	0	0	0	0	0	0	0	0	0	0	0	1	0	0	0	0	0	0	0	0	0	0	0	0	0	0
ESV_437296	Eukaryota	Arthropoda	Insecta	Diptera	Psychodidae	Psychodopygus	Psychodopygus panamensis	98.1	0	0	0	0	0	0	0	0	0	0	0	0	0	0	0	0	0	0	0	0	0	0	0	0	0	0	0	0	0	0	0	0	0	0	0	0	0	0	0	0	0
ESV_437320	Eukaryota	Arthropoda	Insecta	Blattodea	Termitidae	Nasutitermes	Nasutitermes corniger	100	0	0	0	0	0	0	0	0	0	0	0	0	0	0	0	0	0	0	0	0	0	0	0	0	0	0	0	0	0	0	0	0	0	0	0	0	1	13	0	1	6
ESV_437347	Eukaryota	Arthropoda	Insecta	Diptera	Cecidomyiidae			98.7	0	0	0	0	0	0	0	0	0	0	0	0	7	25	1	2	0	3	2	0	2	3	2	0	0	0	0	0	0	0	0	0	0	0	0	0	0	0	0	0	0
ESV_437368	Eukaryota	Arthropoda	Arachnida	Ixodida	Ixodidae			100	0	0	0	0	0	0	0	0	1	0	0	0	0	0	0	1	0	0	0	0	0	0	0	0	0	0	0	0	0	0	0	0	0	0	7	0	0	0	0	1	1
ESV_437372	Eukaryota	Arthropoda	Insecta	Diptera	Cecidomyiidae			93.6	0	0	0	0	0	0	0	0	0	0	0	0	0	0	0	0	0	0	0	0	0	0	0	0	0	0	0	0	0	0	0	0	0	0	0	0	0	0	0	0	0
ESV_437478	Eukaryota	Arthropoda	Insecta	Diptera	Cecidomyiidae			96.8	0	0	0	0	0	0	0	0	0	0	0	0	0	0	0	0	0	0	0	0	0	0	0	0	0	0	0	0	0	0	0	0	0	0	0	0	0	0	0	0	0
ESV_437487	Eukaryota	Arthropoda	Insecta					87.9	0	0	0	0	0	0	0	0	0	0	0	0	0	0	0	0	0	0	0	0	0	0	0	0	0	0	0	0	0	0	0	0	0	0	0	0	0	0	0	0	0
ESV_437496	Eukaryota	Arthropoda	Insecta					85.9	0	0	0	0	0	0	0	0	0	0	0	13	0	11	1	0	0	0	0	0	0	0	0	0	0	0	0	0	0	0	0	0	0	0	0	0	0	0	0	0	0
ESV_437505	Eukaryota	Arthropoda	Insecta	Diptera	Cecidomyiidae			93.3	0	0	0	0	0	0	0	0	0	0	0	0	0	0	0	0	0	0	0	0	0	0	0	0	0	0	0	0	0	0	0	0	0	0	0	0	0	0	0	0	0
ESV_437541	Eukaryota	Arthropoda	Insecta	Diptera	Cecidomyiidae			94.9	0	0	0	0	0	0	0	0	0	0	0	0	0	0	0	0	0	0	0	1	0	0	0	0	0	0	0	0	0	0	0	0	0	0	0	0	0	0	0	0	0
ESV_437543	Eukaryota	Arthropoda	Insecta	Diptera	Cecidomyiidae			95.5	0	0	0	0	0	0	0	0	0	0	0	0	9	1	1	0	0	0	0	0	1	0	0	2	0	0	0	0	0	0	0	0	0	0	0	0	0	0	0	0	0
ESV_437642	Eukaryota	Arthropoda	Insecta	Diptera				95.9	0	0	0	0	0	0	0	0	0	0	0	0	0	0	0	0	0	0	0	0	0	0	0	0	0	0	0	0	0	0	0	0	0	0	0	0	0	0	0	0	0
ESV_437752	Eukaryota	Arthropoda	Insecta	Diptera	Cecidomyiidae			93.6	0	0	0	0	0	0	0	0	0	0	0	0	0	0	0	0	0	0	0	0	0	0	0	0	0	0	0	0	0	0	0	0	0	0	0	0	0	0	0	0	0
ESV_437895	Eukaryota	Arthropoda	Insecta	Diptera	Tachinidae	Acaulona	Acaulona costata	92.3	0	0	0	0	0	0	0	0	0	0	0	0	0	0	0	0	0	0	0	0	0	0	0	0	0	0	0	0	0	0	0	0	0	0	0	0	0	0	0	0	0
ESV_437904	Eukaryota	Arthropoda	Insecta	Diptera	Cecidomyiidae			95.5	0	0	0	0	0	0	0	0	0	0	0	0	0	0	0	0	0	0	0	0	0	0	0	0	0	0	0	0	0	0	0	0	0	0	0	0	0	0	0	0	0
ESV_437938	Eukaryota	Arthropoda	Insecta	Diptera	Psychodidae	Trichomyia		100	10	0	0	0	1	0	0	0	0	0	0	0	0	0	0	0	0	0	0	0	0	0	0	0	0	0	0	0	0	0	0	0	0	0	0	0	0	0	0	0	0
ESV_437950	Eukaryota	Arthropoda	Insecta	Diptera	Cecidomyiidae			97.8	0	0	0	0	0	0	0	0	0	0	0	0	9	10	3	2	6	0	4	0	0	3	9	1	0	0	0	0	0	0	0	0	0	0	0	0	0	0	0	0	0
ESV_438032	Eukaryota	Arthropoda	Insecta	Diptera	Cecidomyiidae			96.8	0	0	0	0	0	0	0	0	0	0	0	0	0	0	0	0	0	0	0	0	0	0	0	0	0	0	0	0	0	0	0	0	0	0	0	0	0	0	0	0	0
ESV_438078	Eukaryota	Arthropoda	Insecta	Diptera	Cecidomyiidae			93.6	0	0	0	0	0	0	0	0	0	0	0	0	0	0	0	0	0	0	0	0	0	0	0	0	0	0	0	0	0	0	0	0	0	0	0	0	0	0	0	0	0
ESV_438079	Eukaryota	Arthropoda	Insecta	Diptera	Psychodidae	Pressatia	Pressatia camposi	97.8	0	0	0	0	0	0	0	0	0	0	0	0	0	0	0	0	0	0	0	0	0	0	0	0	0	0	0	0	0	0	0	0	0	0	0	0	0	0	0	0	0
ESV_438133	Eukaryota	Arthropoda	Insecta	Diptera	Cecidomyiidae			98.1	0	0	0	0	0	0	0	0	0	0	0	0	0	0	0	0	0	0	0	0	0	0	0	0	0	0	0	0	0	0	0	0	0	0	0	0	0	0	0	0	0
ESV_438140	Eukaryota	Chordata	Aves	Columbiformes	Columbidae	Leptotila	Leptotila cassinii	100	0	0	16	0	0	0	0	0	0	1	0	0	0	8	0	0	1	2	2	0	0	1	0	0	0	0	0	0	0	0	0	0	0	0	0	0	0	0	0	0	0
ESV_438191	Eukaryota	Arthropoda	Insecta	Diptera	Cecidomyiidae			94.2	0	0	0	0	0	0	0	0	0	0	0	0	0	0	0	0	0	0	0	0	0	0	0	0	0	0	0	0	0	0	0	0	0	0	0	0	0	0	0	0	0
ESV_438196	Eukaryota	Arthropoda	Insecta	Diptera	Cecidomyiidae			95.2	0	0	0	0	0	0	0	0	0	0	0	0	4	1	0	2	1	15	3	0	0	0	1	1	0	0	0	0	0	0	0	0	0	2	0	0	0	0	0	0	0
ESV_438399	Eukaryota	Arthropoda	Arachnida	Ixodida	Ixodidae	Amblyomma	Amblyomma pecarium	100	0	0	0	0	0	0	0	0	0	0	0	0	0	0	0	0	0	0	0	0	0	0	0	0	0	0	0	0	0	0	0	0	0	0	0	1	0	0	0	2	0
ESV_438420	Eukaryota	Arthropoda	Insecta	Diptera	Psychodidae	Psychodopygus	Psychodopygus panamensis	95.8	0	0	0	0	0	0	0	0	0	0	0	0	0	0	0	0	0	0	0	0	0	0	0	0	0	0	0	0	0	0	0	0	0	0	0	0	0	0	0	0	0
ESV_438438	Eukaryota	Arthropoda	Insecta	Lepidoptera	Geometridae	Pseudeusemia		85.6	0	0	0	0	0	0	0	0	0	0	0	0	0	0	0	0	0	0	0	0	0	0	0	0	0	0	0	0	0	0	0	0	0	0	0	0	0	0	0	0	0
ESV_438441	Eukaryota	Arthropoda	Insecta	Diptera	Cecidomyiidae			97.4	0	0	0	0	0	0	0	0	0	0	0	0	0	2	6	5	2	3	3	1	0	3	5	1	0	0	2	1	0	1	0	0	0	0	2	2	0	0	0	0	0
ESV_438497	Eukaryota	Arthropoda	Insecta	Diptera	Cecidomyiidae			96.5	0	0	0	0	0	0	0	0	0	0	0	0	0	0	0	0	0	0	0	0	0	0	0	0	0	0	0	0	0	0	0	0	0	0	0	0	0	0	0	0	0
ESV_438654	Eukaryota	Arthropoda	Insecta	Diptera	Cecidomyiidae			94.2	0	0	0	0	0	0	0	0	0	0	0	0	0	0	1	0	0	0	0	0	0	0	0	0	0	0	0	0	0	0	0	0	0	0	0	0	0	0	0	0	0
ESV_438685	Eukaryota	Arthropoda	Insecta	Diptera	Cecidomyiidae			95.2	0	0	0	0	0	0	0	0	0	0	0	0	0	0	0	0	0	0	0	0	0	0	0	0	0	0	0	0	0	0	0	0	0	0	0	0	0	0	0	0	0
ESV_438737	Eukaryota	Arthropoda	Insecta	Diptera	Cecidomyiidae			91.4	0	0	0	0	0	0	0	0	0	0	0	0	0	0	0	0	0	0	0	0	0	0	0	0	0	0	0	0	0	0	0	0	0	0	0	0	0	0	0	0	0
ESV_438771	Eukaryota	Arthropoda	Insecta	Thysanoptera	Phlaeothripidae	Haplothrips	Haplothrips tenuipennis	85.6	0	0	0	0	0	1	0	0	0	0	0	0	0	0	0	0	0	0	0	0	0	0	0	0	0	0	0	0	0	0	0	0	0	0	0	0	13	0	0	0	0
ESV_438792	Eukaryota	Arthropoda	Insecta	Diptera	Cecidomyiidae			95.2	0	0	0	0	0	0	0	0	0	0	0	0	0	0	0	0	0	0	0	0	0	0	0	0	0	0	0	0	0	0	0	0	0	0	0	0	0	0	0	0	0
ESV_438823	Eukaryota	Arthropoda	Insecta	Diptera	Cecidomyiidae			97.1	0	0	0	0	0	0	0	0	0	0	0	0	0	0	0	0	0	0	0	0	0	0	0	0	0	0	0	0	0	0	0	0	0	0	0	0	0	0	0	0	0
ESV_438839	Eukaryota	Arthropoda	Insecta	Diptera	Phoridae			97.8	0	0	0	0	0	0	0	0	0	0	0	0	0	0	0	0	0	0	0	0	0	0	0	0	0	0	0	0	0	0	0	0	0	0	0	0	0	0	0	0	0
ESV_439020	Eukaryota	Arthropoda	Insecta	Lepidoptera				97.1	0	0	0	0	0	0	0	0	0	0	0	0	0	0	0	0	0	0	0	0	0	0	0	0	0	0	0	0	0	0	0	0	0	0	0	0	0	0	0	0	0
ESV_439104	Eukaryota	Arthropoda	Insecta	Diptera	Cecidomyiidae			97.1	1841	133	93	35	189	143	112	46	207	189	153	163	0	0	0	0	0	0	0	0	0	0	0	0	0	0	0	0	0	0	0	0	0	0	0	0	0	0	0	0	0
ESV_439270	Eukaryota	Arthropoda	Insecta	Lepidoptera				96.5	0	0	0	0	0	0	0	0	0	0	0	0	0	4	1	2	0	0	0	1	61	5	2	0	0	0	0	0	0	0	0	0	0	2	0	0	0	0	0	0	0
ESV_439340	Eukaryota	Arthropoda	Insecta	Coleoptera	Curculionidae	Curculio	Curculio sp. 2 ZM-2022a	91.1	0	0	0	0	0	0	0	0	0	0	0	0	0	0	0	0	0	0	0	0	0	0	0	0	0	0	0	0	0	0	0	0	0	0	0	0	0	23	0	0	1
ESV_439408	Eukaryota	Arthropoda	Insecta	Diptera	Cecidomyiidae			96.5	0	0	0	0	0	0	0	0	0	0	0	0	0	0	0	0	0	0	0	0	0	0	0	0	4	3	2	2	6	2	3	10	5	28	1	5	0	0	0	0	0
ESV_439498	Eukaryota	Arthropoda	Insecta	Thysanoptera	Phlaeothripidae	Haplothrips	Haplothrips tenuipennis	85.6	0	0	0	0	0	0	0	0	0	0	0	0	0	0	0	0	0	0	0	0	0	0	0	0	0	0	0	0	0	0	0	0	0	0	0	0	0	0	0	0	0
ESV_439530	Eukaryota	Chordata	Mammalia	Rodentia	Cuniculidae	Cuniculus	Cuniculus paca	95.8	0	0	1	0	0	0	0	0	0	35	0	0	0	1	0	0	0	0	0	0	0	0	0	0	0	0	0	0	1	0	0	0	0	0	0	0	0	0	0	0	0
ESV_439555	Eukaryota	Arthropoda	Insecta	Diptera	Cecidomyiidae			97.4	0	0	0	0	0	0	0	0	0	0	0	0	0	0	0	1	0	0	1	0	0	0	0	0	0	0	1	0	0	4	0	0	0	0	1	0	0	0	0	0	0
ESV_439565	Eukaryota	Arthropoda	Insecta	Diptera	Cecidomyiidae			97.1	36	16	29	3	29	12	12	3	22	29	14	16	0	0	0	0	0	0	0	0	0	0	0	0	0	0	0	0	0	0	0	0	0	0	0	0	0	0	0	0	0
ESV_439569	Eukaryota	Arthropoda	Insecta	Diptera	Cecidomyiidae			95.5	0	0	0	0	0	0	0	0	0	0	0	0	0	0	1	5	0	1	0	0	0	1	0	0	33	33	36	27	5	21	15	6	13	25	30	11	0	0	0	0	0
ESV_439607	Eukaryota	Arthropoda	Insecta	Psocodea	Psocidae			99.4	0	0	0	0	0	0	0	0	0	0	0	0	0	0	0	0	0	0	0	0	0	0	0	0	0	0	0	0	0	0	0	0	0	0	0	0	0	0	0	12	2
ESV_439618	Eukaryota	Arthropoda	Insecta	Diptera	Cecidomyiidae			94.6	0	0	0	0	0	0	0	0	0	0	0	0	0	0	0	0	0	0	0	0	0	0	0	0	0	0	0	0	0	0	0	0	0	0	0	0	0	0	0	0	0
ESV_439621	Eukaryota	Arthropoda	Insecta	Diptera	Cecidomyiidae			91.7	0	0	0	0	0	0	0	0	0	0	0	0	0	0	0	0	0	0	0	0	0	0	0	0	0	0	0	0	0	0	0	0	0	0	0	0	0	0	0	0	0
ESV_439624	Eukaryota	Arthropoda	Insecta	Diptera	Cecidomyiidae			94.2	0	0	0	0	0	0	0	0	0	0	0	0	0	0	0	0	0	0	0	0	0	0	0	0	0	0	0	0	0	0	0	0	0	0	0	0	0	0	0	0	0
ESV_439847	Eukaryota	Arthropoda	Insecta	Diptera	Cecidomyiidae			94.5	0	0	0	0	0	0	0	0	0	0	0	0	0	0	0	0	0	0	0	0	0	0	0	0	0	0	0	0	0	0	0	0	0	0	0	0	0	0	0	0	0
ESV_439971	Eukaryota	Arthropoda	Insecta	Diptera	Cecidomyiidae			93.6	0	0	0	0	0	0	0	0	0	0	0	0	0	0	0	0	0	0	0	0	0	0	0	0	0	0	0	0	0	0	0	0	0	0	0	0	0	0	0	0	0
ESV_440021	Eukaryota	Arthropoda	Insecta	Diptera	Cecidomyiidae			93.3	0	0	0	0	0	0	0	0	0	0	0	0	0	0	0	0	0	0	0	0	0	0	0	0	0	0	0	0	0	0	0	0	0	0	0	0	0	0	0	0	0
ESV_440133	Eukaryota	Arthropoda	Insecta	Diptera	Cecidomyiidae			93	0	0	0	0	0	0	0	0	0	0	0	0	0	0	0	0	0	0	0	0	0	0	0	0	0	0	0	0	0	0	0	0	0	0	0	0	0	0	0	0	0
ESV_440292	Eukaryota	Chordata	Aves	Accipitriformes	Accipitridae	Rostrhamus	Rostrhamus sociabilis	100	0	0	0	29	0	0	2	1	0	0	0	0	0	0	0	0	0	0	0	0	0	0	0	0	0	0	0	0	0	0	0	0	0	0	0	0	0	0	6	0	0
ESV_440300	Eukaryota	Arthropoda	Insecta	Diptera	Cecidomyiidae			96.5	0	0	0	0	0	0	0	0	0	0	0	0	125	19	65	21	22	9	17	9	20	22	15	14	0	0	1	0	1	0	0	0	0	1	0	1	0	0	0	0	0
ESV_440325	Eukaryota	Arthropoda	Insecta	Coleoptera	Curculionidae	Curculio	Curculio sp. 2 ZM-2022a	92.7	0	0	0	0	0	0	0	0	0	0	0	0	0	0	0	0	0	0	0	0	0	0	0	0	0	0	0	0	0	0	0	0	0	0	15	0	0	1	1	0	0
ESV_440328	Eukaryota	Chordata	Aves	Passeriformes	Thamnophilidae	Thamnophilus	Thamnophilus atrinucha	100	0	0	0	0	0	0	0	0	0	0	0	0	0	0	0	0	0	0	0	0	0	0	0	0	0	0	0	0	0	0	0	0	0	0	0	0	0	0	0	0	0
ESV_440367	Eukaryota	Chordata	Aves	Psittaciformes	Psittacidae	Pionus	Pionus menstruus	100	0	0	0	0	0	0	0	0	0	0	0	0	0	0	0	0	0	0	0	0	0	0	0	0	0	0	0	0	14	0	0	0	0	0	3	0	0	0	0	0	0
ESV_440379	Eukaryota	Arthropoda	Insecta	Diptera	Cecidomyiidae			94.2	0	0	0	0	0	0	0	0	0	0	0	0	0	0	0	0	0	0	0	0	0	0	0	0	0	0	0	0	0	0	0	0	0	0	0	0	0	0	0	0	0
ESV_440736	Eukaryota	Arthropoda	Insecta	Diptera	Cecidomyiidae			94.9	0	0	0	0	0	0	0	0	0	0	0	0	0	0	0	0	0	0	0	0	0	0	0	0	130	45	33	23	9	6	13	18	18	21	24	12	0	0	0	0	0
ESV_440819	Eukaryota	Arthropoda	Insecta	Diptera	Cecidomyiidae			95.2	0	0	0	0	0	0	0	0	0	0	0	0	0	0	0	0	0	0	0	0	0	0	0	0	58	123	43	74	13	22	21	16	22	48	40	24	0	0	0	0	0
ESV_440831	Eukaryota	Arthropoda	Insecta	Diptera	Cecidomyiidae			94.9	0	0	0	0	0	0	0	0	0	0	0	0	0	0	0	0	0	0	0	0	0	0	0	0	0	0	0	0	0	0	0	0	0	0	0	0	0	0	0	0	0
ESV_440859	Eukaryota	Arthropoda	Insecta	Diptera	Cecidomyiidae			97.4	0	0	0	0	0	0	0	0	0	0	0	0	0	0	0	0	0	0	0	0	0	0	0	0	59585	13404	7805	5985	3602	2921	3579	2508	3581	3726	3098	2652	1	0	0	1	0
ESV_440888	Eukaryota	Arthropoda	Insecta	Diptera	Cecidomyiidae			98.1	0	0	0	0	0	0	0	0	0	0	0	0	3	11	0	1	0	0	1	0	0	0	0	0	0	0	0	0	0	0	0	0	0	0	0	0	0	0	0	0	0
ESV_440996	Eukaryota	Arthropoda	Insecta	Diptera	Cecidomyiidae			95.2	0	0	0	0	0	0	0	0	0	0	0	0	0	0	0	0	0	0	0	0	0	0	0	0	0	0	0	0	0	0	0	0	0	0	0	0	0	0	0	0	0
ESV_441006	Eukaryota	Arthropoda	Insecta	Diptera	Cecidomyiidae			96.8	0	0	0	0	0	0	0	0	0	0	0	0	0	0	0	1	0	0	0	0	0	0	0	0	0	0	0	0	0	0	0	0	0	0	0	0	0	0	0	0	0
ESV_441082	Eukaryota	Arthropoda	Insecta	Diptera	Cecidomyiidae			93.6	0	0	0	0	0	0	0	0	0	0	0	0	0	0	0	0	0	0	0	0	0	0	0	0	0	0	0	0	0	0	0	0	0	0	0	0	0	0	0	0	0
ESV_441093	Eukaryota	Arthropoda	Insecta	Diptera	Cecidomyiidae			95.2	0	0	0	0	0	0	0	0	0	0	0	0	0	0	0	0	0	0	0	0	0	0	0	0	0	0	0	0	0	0	0	0	0	0	0	0	0	0	0	0	0
ESV_441101	Eukaryota	Arthropoda	Insecta	Diptera	Cecidomyiidae			97.4	0	0	0	0	0	0	0	0	0	0	0	0	0	0	0	0	0	0	0	0	0	0	0	0	0	0	0	0	0	0	0	0	0	0	0	0	0	0	0	0	0
ESV_441135	Eukaryota	Arthropoda	Insecta	Diptera	Cecidomyiidae			95.2	0	0	0	0	0	0	0	0	0	0	0	0	0	0	0	0	0	0	0	0	0	0	0	0	0	0	0	0	0	0	0	0	0	0	0	0	0	0	0	0	0
ESV_441173	Eukaryota	Arthropoda	Insecta	Diptera	Cecidomyiidae			93.6	0	0	0	0	0	0	0	0	0	0	0	0	0	0	0	0	0	0	0	0	0	0	0	0	0	0	0	0	0	0	0	0	0	0	0	0	0	0	0	0	0
ESV_441349	Eukaryota	Arthropoda	Insecta	Diptera	Cecidomyiidae			97.8	0	0	0	0	0	0	0	0	0	0	0	0	11	329	282	21	7	2	0	4	6	3	6	5	0	0	8	0	1	0	0	0	0	0	0	0	0	0	0	0	0
ESV_441373	Eukaryota	Arthropoda	Insecta	Diptera	Cecidomyiidae			94.9	0	0	0	0	0	0	0	0	0	0	0	0	0	0	0	1	0	0	0	0	0	0	0	0	0	0	0	0	0	0	0	0	0	0	0	0	0	0	0	0	0
ESV_441526	Eukaryota	Arthropoda	Insecta	Diptera	Cecidomyiidae			93.6	0	0	0	0	0	0	0	0	0	0	0	0	0	0	0	0	0	0	0	0	0	0	0	0	0	0	0	0	0	0	0	0	0	0	0	0	0	0	0	0	0
ESV_441588	Eukaryota	Arthropoda	Insecta	Diptera	Cecidomyiidae			96.5	0	0	0	0	0	0	0	0	0	0	0	0	0	0	0	0	0	0	0	0	0	0	0	0	0	0	0	0	0	0	0	0	0	0	0	0	0	0	0	0	0
ESV_441775	Eukaryota	Arthropoda	Insecta	Coleoptera	Curculionidae	Curculio	Curculio sp. 2 ZM-2022a	93.6	0	0	0	0	0	20	0	0	0	0	0	0	0	0	0	0	0	0	0	0	0	0	0	0	0	0	1	0	0	0	0	5	0	0	0	1	0	1	0	2	0
ESV_441799	Eukaryota	Arthropoda	Insecta	Diptera	Cecidomyiidae			94.6	0	0	0	0	0	0	0	0	1	0	0	0	0	0	0	0	0	0	0	0	0	0	0	0	0	0	0	0	0	0	0	0	0	0	0	0	0	0	0	0	0
ESV_441956	Eukaryota	Arthropoda	Insecta	Diptera	Cecidomyiidae			94.2	0	0	0	0	0	0	0	0	0	0	0	0	0	0	0	0	0	0	0	0	0	0	0	0	0	0	0	0	0	0	0	0	0	0	0	0	0	0	0	0	0
ESV_442062	Eukaryota	Arthropoda	Insecta	Diptera	Cecidomyiidae			93.3	0	0	0	0	0	0	0	0	0	0	0	0	0	0	0	0	0	0	0	0	0	0	0	0	11	13	2	69	4	39	3	4	6	6	191	67	0	0	0	0	0
ESV_442098	Eukaryota	Arthropoda	Insecta	Coleoptera	Chrysomelidae			99.7	0	0	0	0	0	0	0	0	0	0	0	0	0	0	0	0	0	0	0	0	0	0	0	0	0	0	0	0	0	0	0	0	0	0	0	0	0	0	0	0	0
ESV_442126	Eukaryota	Arthropoda	Insecta	Diptera	Cecidomyiidae			94.2	0	0	0	0	0	0	0	0	0	0	0	0	0	0	0	0	0	0	0	0	0	0	0	0	0	0	0	0	0	0	0	0	0	0	0	0	0	0	0	0	0
ESV_442153	Eukaryota	Arthropoda	Insecta	Diptera	Cecidomyiidae			94.2	0	0	0	0	0	0	0	0	0	0	0	0	0	0	0	0	0	0	0	0	0	0	0	0	0	0	0	0	0	0	0	0	0	0	0	0	0	0	0	0	0
ESV_442237	Eukaryota	Arthropoda	Insecta	Diptera	Cecidomyiidae			92.3	0	0	0	0	0	0	0	0	0	0	0	0	0	0	0	0	0	0	0	0	0	0	0	0	0	0	0	0	0	0	0	0	0	0	0	0	0	0	0	0	0
ESV_442328	Eukaryota	Arthropoda	Insecta					96.8	0	0	0	0	0	0	0	0	0	0	0	0	15	1	1	1	0	0	1	0	2	0	1	1	0	0	0	0	0	0	0	0	0	0	0	0	0	0	0	0	0
ESV_442357	Eukaryota	Arthropoda	Insecta	Diptera	Cecidomyiidae			93.9	0	0	0	0	0	0	0	0	0	0	0	0	8	3	14	7	0	3	3	1	3	4	2	1	0	1	0	0	0	0	0	1	0	1	0	0	0	0	0	0	0
ESV_442379	Eukaryota	Arthropoda	Insecta	Diptera	Sarcophagidae	Ravinia	Ravinia querula	100	0	0	0	0	0	0	0	0	0	0	0	0	0	0	0	0	0	0	0	0	0	0	0	0	0	0	0	0	0	0	0	0	0	0	0	0	0	0	0	0	0
ESV_442392	Eukaryota	Arthropoda	Insecta	Diptera	Cecidomyiidae			95.8	0	0	0	0	0	0	0	0	0	0	0	0	0	0	0	0	0	0	0	0	0	0	0	0	0	0	0	0	0	0	0	0	0	0	0	0	0	0	0	0	0
ESV_442426	Eukaryota	Arthropoda	Insecta	Diptera	Cecidomyiidae			93.3	0	0	0	0	0	0	0	0	0	0	0	0	0	0	0	0	0	0	0	0	0	0	0	0	0	0	0	0	0	0	0	0	0	0	0	0	0	0	0	0	0
[truncated: 631 more columns]

## Sheet: Table_S3
Table S3. Reference database (NCBI or BOLD, depending on which had the highest pctMatch) hits for each COI OTU
OTU	Database	pctMatch	Identifier	Kingdom	Phylum	Class	Order	Family	Genus	Species
ESV_030595	BOLD	100	CRATB21402-24	Animalia	Arthropoda	Arachnida	Araneae
ESV_030595	BOLD	100	CRBOE33969-23	Animalia	Arthropoda	Insecta	Coleoptera
ESV_030595	BOLD	100	CRBTB26288-24	Animalia	Arthropoda	Insecta	Coleoptera
ESV_030595	BOLD	100	CRCCB36261-24	Animalia	Arthropoda	Insecta	Coleoptera
ESV_030595	BOLD	100	CRLDA14814-24	Animalia	Arthropoda	Insecta	Coleoptera
ESV_030595	BOLD	100	CRLDA6732-24	Animalia	Arthropoda	Insecta	Coleoptera
ESV_030595	BOLD	100	CRATD27080-24	Animalia	Arthropoda	Insecta	Diptera
ESV_030595	BOLD	100	CRATD6300-24	Animalia	Arthropoda	Insecta	Diptera
ESV_030595	BOLD	100	CRATE19039-24	Animalia	Arthropoda	Insecta	Diptera
ESV_030595	BOLD	100	CRATE4298-24	Animalia	Arthropoda	Insecta	Diptera
ESV_030595	BOLD	100	CRATE3772-24	Animalia	Arthropoda	Insecta	Diptera
ESV_030595	BOLD	100	CRATE5830-24	Animalia	Arthropoda	Insecta	Diptera
ESV_030595	BOLD	100	CRBLD5981-23	Animalia	Arthropoda	Insecta	Diptera
ESV_030595	BOLD	100	CRBOB16778-23	Animalia	Arthropoda	Insecta	Diptera
ESV_030595	BOLD	100	CRBOB24361-23	Animalia	Arthropoda	Insecta	Diptera
ESV_030595	BOLD	100	CRBOE42410-23	Animalia	Arthropoda	Insecta	Diptera
ESV_030595	BOLD	100	CRBOF10677-24	Animalia	Arthropoda	Insecta	Diptera
ESV_030595	BOLD	100	CRBOF15868-24	Animalia	Arthropoda	Insecta	Diptera
ESV_030595	BOLD	100	CRBOH23625-24	Animalia	Arthropoda	Insecta	Diptera
ESV_030595	BOLD	100	CRBOH30192-24	Animalia	Arthropoda	Insecta	Diptera
ESV_030595	BOLD	100	CRBOI11903-24	Animalia	Arthropoda	Insecta	Diptera
ESV_030595	BOLD	100	CRBPA25702-24	Animalia	Arthropoda	Insecta	Diptera
ESV_030595	BOLD	100	CRBPA31786-24	Animalia	Arthropoda	Insecta	Diptera
ESV_030595	BOLD	100	CRBPA31917-24	Animalia	Arthropoda	Insecta	Diptera
ESV_030595	BOLD	100	CRBTA21476-24	Animalia	Arthropoda	Insecta	Diptera
ESV_030595	BOLD	100	CRBTA31450-24	Animalia	Arthropoda	Insecta	Diptera
ESV_030595	BOLD	100	CRBTA49376-24	Animalia	Arthropoda	Insecta	Diptera
ESV_030595	BOLD	100	CRBTB26023-24	Animalia	Arthropoda	Insecta	Diptera
ESV_030595	BOLD	100	CRCBE6948-23	Animalia	Arthropoda	Insecta	Diptera
ESV_030595	BOLD	100	CRCCB35651-24	Animalia	Arthropoda	Insecta	Diptera
ESV_030595	BOLD	100	CRCCC2312-23	Animalia	Arthropoda	Insecta	Diptera
ESV_030595	BOLD	100	CRCCE13960-23	Animalia	Arthropoda	Insecta	Diptera
ESV_030595	BOLD	100	CRCCG13484-24	Animalia	Arthropoda	Insecta	Diptera
ESV_030595	BOLD	100	CRCCG20111-24	Animalia	Arthropoda	Insecta	Diptera
ESV_030595	BOLD	100	CRCCG35133-24	Animalia	Arthropoda	Insecta	Diptera
ESV_030595	BOLD	100	CRCCJ8539-24	Animalia	Arthropoda	Insecta	Diptera
ESV_030595	BOLD	100	CRCCK14473-24	Animalia	Arthropoda	Insecta	Diptera
ESV_030595	BOLD	100	CRCCK7685-24	Animalia	Arthropoda	Insecta	Diptera
ESV_030595	BOLD	100	CRCED17207-23	Animalia	Arthropoda	Insecta	Diptera
ESV_030595	BOLD	100	CRLDA2403-24	Animalia	Arthropoda	Insecta	Diptera
ESV_030595	BOLD	100	CRLDA32281-24	Animalia	Arthropoda	Insecta	Diptera
ESV_030595	BOLD	100	CRLDC13483-24	Animalia	Arthropoda	Insecta	Diptera
ESV_030595	BOLD	100	CRLDC31745-24	Animalia	Arthropoda	Insecta	Diptera
ESV_030595	BOLD	100	CRLDD11943-24	Animalia	Arthropoda	Insecta	Diptera
ESV_030595	BOLD	100	CRLDD24112-24	Animalia	Arthropoda	Insecta	Diptera
ESV_030595	BOLD	100	CRATC34249-23	Animalia	Arthropoda	Insecta	Hemiptera
ESV_030595	BOLD	100	CRATE6404-24	Animalia	Arthropoda	Insecta	Hemiptera
ESV_030595	BOLD	100	CRBTA47148-24	Animalia	Arthropoda	Insecta	Hemiptera
ESV_030595	BOLD	100	CRCBD10002-23	Animalia	Arthropoda	Insecta	Hemiptera
ESV_030595	BOLD	100	CRCBD10045-23	Animalia	Arthropoda	Insecta	Hemiptera
ESV_030595	BOLD	100	CRCBD12737-23	Animalia	Arthropoda	Insecta	Hemiptera
ESV_030595	BOLD	100	CRCCG44761-24	Animalia	Arthropoda	Insecta	Hemiptera
ESV_030595	BOLD	100	CRCCG4424-24	Animalia	Arthropoda	Insecta	Hemiptera
ESV_030595	BOLD	100	CIOSA17875-23	Animalia	Arthropoda	Insecta	Hymenoptera
ESV_030595	BOLD	100	CRATC34244-23	Animalia	Arthropoda	Insecta	Hymenoptera
ESV_030595	BOLD	100	CRATC48791-24	Animalia	Arthropoda	Insecta	Hymenoptera
ESV_030595	BOLD	100	CRBOB2636-23	Animalia	Arthropoda	Insecta	Hymenoptera
ESV_030595	BOLD	100	CRBOB26572-23	Animalia	Arthropoda	Insecta	Hymenoptera
ESV_030595	BOLD	100	CRBOE38209-23	Animalia	Arthropoda	Insecta	Hymenoptera
ESV_030595	BOLD	100	CRBOF25415-24	Animalia	Arthropoda	Insecta	Hymenoptera
ESV_030595	BOLD	100	CRBPA36975-24	Animalia	Arthropoda	Insecta	Hymenoptera
ESV_030595	BOLD	100	CRBTB9919-24	Animalia	Arthropoda	Insecta	Hymenoptera
ESV_030595	BOLD	100	CRBTE21295-24	Animalia	Arthropoda	Insecta	Hymenoptera
ESV_030595	BOLD	100	CRCBC14819-23	Animalia	Arthropoda	Insecta	Hymenoptera
ESV_030595	BOLD	100	CRCBC39114-23	Animalia	Arthropoda	Insecta	Hymenoptera
ESV_030595	BOLD	100	CRCCB34211-24	Animalia	Arthropoda	Insecta	Hymenoptera
ESV_030595	BOLD	100	CRCCJ7265-24	Animalia	Arthropoda	Insecta	Hymenoptera
ESV_030595	BOLD	100	CRCCK2801-24	Animalia	Arthropoda	Insecta	Hymenoptera
ESV_030595	BOLD	100	ABWYT29883-24	Animalia	Arthropoda	Arachnida
ESV_030595	BOLD	100	CRLDD11942-24	Animalia	Arthropoda	Insecta
ESV_030595	BOLD	100	CRBLD24739-24	Animalia	Arthropoda
ESV_071595	BOLD	100	SETIU049-16	Animalia	Arthropoda	Insecta	Lepidoptera	Lycaenidae	Arhopala	Arhopala sp. 1
ESV_336625	BOLD	99.7	GBDP32805-19	Animalia	Arthropoda	Insecta	Diptera	Ceratopogonidae	Culicoides	Culicoides sp. G HB-2016
ESV_337083	NCBI	100	KY832140	Eukaryota	Arthropoda	Insecta	Diptera	Chironomidae	Limnophyes	Limnophyes sp. BIOUG02131-C09
ESV_337083	NCBI	100	KY834053	Eukaryota	Arthropoda	Insecta	Diptera	Chironomidae	Limnophyes	Limnophyes sp. BIOUG02131-E08
ESV_337083	NCBI	100	KY835402	Eukaryota	Arthropoda	Insecta	Diptera	Chironomidae	Limnophyes	Limnophyes sp. BIOUG02131-G07
ESV_337083	NCBI	100	KY833738	Eukaryota	Arthropoda	Insecta	Diptera	Chironomidae	Limnophyes	Limnophyes sp. BIOUG02131-H05
ESV_337083	NCBI	100	KY832686	Eukaryota	Arthropoda	Insecta	Diptera	Chironomidae	Limnophyes	Limnophyes sp. BIOUG02131-H06
ESV_337083	NCBI	100	KY835430	Eukaryota	Arthropoda	Insecta	Diptera	Chironomidae	Limnophyes	Limnophyes sp. BIOUG02132-C12
ESV_337083	NCBI	100	KY835324	Eukaryota	Arthropoda	Insecta	Diptera	Chironomidae	Limnophyes	Limnophyes sp. BIOUG02132-D03
ESV_337083	NCBI	100	KY831750	Eukaryota	Arthropoda	Insecta	Diptera	Chironomidae	Limnophyes	Limnophyes sp. BIOUG02132-D08
ESV_337083	NCBI	100	KY845319	Eukaryota	Arthropoda	Insecta	Diptera	Chironomidae	Limnophyes	Limnophyes sp. BIOUG02132-E03
ESV_337083	NCBI	100	KY831495	Eukaryota	Arthropoda	Insecta	Diptera	Chironomidae	Limnophyes	Limnophyes sp. BIOUG02132-E04
ESV_337083	NCBI	100	KY830708	Eukaryota	Arthropoda	Insecta	Diptera	Chironomidae	Limnophyes	Limnophyes sp. BIOUG02132-F03
ESV_337083	NCBI	100	KY833406	Eukaryota	Arthropoda	Insecta	Diptera	Chironomidae	Limnophyes	Limnophyes sp. BIOUG02132-F08
ESV_337083	NCBI	100	KY843717	Eukaryota	Arthropoda	Insecta	Diptera	Chironomidae	Limnophyes	Limnophyes sp. BIOUG02133-B11
ESV_337083	NCBI	100	KY836055	Eukaryota	Arthropoda	Insecta	Diptera	Chironomidae	Limnophyes	Limnophyes sp. BIOUG02133-C09
ESV_337083	NCBI	100	KY835145	Eukaryota	Arthropoda	Insecta	Diptera	Chironomidae	Limnophyes	Limnophyes sp. BIOUG02133-D01
ESV_337083	NCBI	100	KY835279	Eukaryota	Arthropoda	Insecta	Diptera	Chironomidae	Limnophyes	Limnophyes sp. BIOUG02133-E08
ESV_337083	NCBI	100	KY835416	Eukaryota	Arthropoda	Insecta	Diptera	Chironomidae	Limnophyes	Limnophyes sp. BIOUG02135-E02
ESV_337083	NCBI	100	KY830632	Eukaryota	Arthropoda	Insecta	Diptera	Chironomidae	Limnophyes	Limnophyes sp. BIOUG02136-B12
ESV_337083	NCBI	100	KY832905	Eukaryota	Arthropoda	Insecta	Diptera	Chironomidae	Limnophyes	Limnophyes sp. BIOUG02136-C07
ESV_337083	NCBI	100	KY832338	Eukaryota	Arthropoda	Insecta	Diptera	Chironomidae	Limnophyes	Limnophyes sp. BIOUG02136-E06
ESV_337083	NCBI	100	KY832129	Eukaryota	Arthropoda	Insecta	Diptera	Chironomidae	Limnophyes	Limnophyes sp. BIOUG02136-G10
ESV_337083	NCBI	100	KY844480	Eukaryota	Arthropoda	Insecta	Diptera	Chironomidae	Limnophyes	Limnophyes sp. BIOUG02136-H08
ESV_337083	NCBI	100	KY829970	Eukaryota	Arthropoda	Insecta	Diptera	Chironomidae	Limnophyes	Limnophyes sp. BIOUG02138-B02
ESV_337083	NCBI	100	KY831193	Eukaryota	Arthropoda	Insecta	Diptera	Chironomidae	Limnophyes	Limnophyes sp. BIOUG02138-C10
ESV_337083	NCBI	100	KY834135	Eukaryota	Arthropoda	Insecta	Diptera	Chironomidae	Limnophyes	Limnophyes sp. BIOUG02143-F09
ESV_337083	NCBI	100	KY836039	Eukaryota	Arthropoda	Insecta	Diptera	Chironomidae	Limnophyes	Limnophyes sp. BIOUG02144-C02
ESV_337083	NCBI	100	KY834236	Eukaryota	Arthropoda	Insecta	Diptera	Chironomidae	Limnophyes	Limnophyes sp. BIOUG02150-C02
ESV_337083	NCBI	100	KY833296	Eukaryota	Arthropoda	Insecta	Diptera	Chironomidae	Limnophyes	Limnophyes sp. BIOUG02150-D04
ESV_337083	NCBI	100	KY832018	Eukaryota	Arthropoda	Insecta	Diptera	Chironomidae	Limnophyes	Limnophyes sp. BIOUG02150-F09
ESV_337083	NCBI	100	KY829821	Eukaryota	Arthropoda	Insecta	Diptera	Chironomidae	Limnophyes	Limnophyes sp. BIOUG02150-G05
ESV_337083	NCBI	100	KY847246	Eukaryota	Arthropoda	Insecta	Diptera	Chironomidae	Limnophyes	Limnophyes sp. BIOUG02150-G09
ESV_337083	NCBI	100	KY835921	Eukaryota	Arthropoda	Insecta	Diptera	Chironomidae	Limnophyes	Limnophyes sp. BIOUG02150-G10
ESV_337083	NCBI	100	KY833698	Eukaryota	Arthropoda	Insecta	Diptera	Chironomidae	Limnophyes	Limnophyes sp. BIOUG02150-G12
ESV_337083	NCBI	100	KY835035	Eukaryota	Arthropoda	Insecta	Diptera	Chironomidae	Limnophyes	Limnophyes sp. BIOUG02150-H01
ESV_337083	NCBI	100	KY834852	Eukaryota	Arthropoda	Insecta	Diptera	Chironomidae	Limnophyes	Limnophyes sp. BIOUG02150-H04
ESV_337083	NCBI	100	KY834079	Eukaryota	Arthropoda	Insecta	Diptera	Chironomidae	Limnophyes	Limnophyes sp. BIOUG02150-H08
ESV_337083	NCBI	100	KY843756	Eukaryota	Arthropoda	Insecta	Diptera	Chironomidae	Limnophyes	Limnophyes sp. BIOUG02150-H11
ESV_337083	NCBI	100	KY835870	Eukaryota	Arthropoda	Insecta	Diptera	Chironomidae	Limnophyes	Limnophyes sp. BIOUG02191-A09
ESV_337083	NCBI	100	KY831656	Eukaryota	Arthropoda	Insecta	Diptera	Chironomidae	Limnophyes	Limnophyes sp. BIOUG02191-A10
ESV_337083	NCBI	100	KY844413	Eukaryota	Arthropoda	Insecta	Diptera	Chironomidae	Limnophyes	Limnophyes sp. BIOUG02191-B05
ESV_337083	NCBI	100	KY832848	Eukaryota	Arthropoda	Insecta	Diptera	Chironomidae	Limnophyes	Limnophyes sp. BIOUG02191-D02
ESV_337083	NCBI	100	KY843709	Eukaryota	Arthropoda	Insecta	Diptera	Chironomidae	Limnophyes	Limnophyes sp. BIOUG02191-D05
ESV_337083	NCBI	100	KY833058	Eukaryota	Arthropoda	Insecta	Diptera	Chironomidae	Limnophyes	Limnophyes sp. BIOUG02191-D07
ESV_337083	NCBI	100	KY835927	Eukaryota	Arthropoda	Insecta	Diptera	Chironomidae	Limnophyes	Limnophyes sp. BIOUG02191-H08
ESV_337083	NCBI	100	KY835265	Eukaryota	Arthropoda	Insecta	Diptera	Chironomidae	Limnophyes	Limnophyes sp. BIOUG02192-C05
ESV_337083	NCBI	100	KY845288	Eukaryota	Arthropoda	Insecta	Diptera	Chironomidae	Limnophyes	Limnophyes sp. BIOUG02192-C06
ESV_337083	NCBI	100	KY833724	Eukaryota	Arthropoda	Insecta	Diptera	Chironomidae	Limnophyes	Limnophyes sp. BIOUG02192-C11
ESV_337083	NCBI	100	KY844978	Eukaryota	Arthropoda	Insecta	Diptera	Chironomidae	Limnophyes	Limnophyes sp. BIOUG02192-D09
ESV_337083	NCBI	100	KY833911	Eukaryota	Arthropoda	Insecta	Diptera	Chironomidae	Limnophyes	Limnophyes sp. BIOUG02192-F06
ESV_337083	NCBI	100	KY835631	Eukaryota	Arthropoda	Insecta	Diptera	Chironomidae	Limnophyes	Limnophyes sp. BIOUG02192-G04
ESV_337083	NCBI	100	KY832570	Eukaryota	Arthropoda	Insecta	Diptera	Chironomidae	Limnophyes	Limnophyes sp. BIOUG02192-H04
ESV_337083	NCBI	100	KY846866	Eukaryota	Arthropoda	Insecta	Diptera	Chironomidae	Limnophyes	Limnophyes sp. BIOUG02193-F01
ESV_337083	NCBI	100	KY831809	Eukaryota	Arthropoda	Insecta	Diptera	Chironomidae	Limnophyes	Limnophyes sp. BIOUG02193-G12
ESV_337083	NCBI	100	KY831156	Eukaryota	Arthropoda	Insecta	Diptera	Chironomidae	Limnophyes	Limnophyes sp. BIOUG02194-A07
ESV_337083	NCBI	100	KY836005	Eukaryota	Arthropoda	Insecta	Diptera	Chironomidae	Limnophyes	Limnophyes sp. BIOUG02194-D07
ESV_337083	NCBI	100	KY846752	Eukaryota	Arthropoda	Insecta	Diptera	Chironomidae	Limnophyes	Limnophyes sp. BIOUG02194-E03
ESV_337083	NCBI	100	KY831883	Eukaryota	Arthropoda	Insecta	Diptera	Chironomidae	Limnophyes	Limnophyes sp. BIOUG02194-F05
ESV_337083	NCBI	100	KY832994	Eukaryota	Arthropoda	Insecta	Diptera	Chironomidae	Limnophyes	Limnophyes sp. BIOUG02194-G11
ESV_337083	NCBI	100	KY835795	Eukaryota	Arthropoda	Insecta	Diptera	Chironomidae	Limnophyes	Limnophyes sp. BIOUG02194-G12
ESV_337083	NCBI	100	KY830294	Eukaryota	Arthropoda	Insecta	Diptera	Chironomidae	Limnophyes	Limnophyes sp. BIOUG02195-D12
ESV_337083	NCBI	100	KY833488	Eukaryota	Arthropoda	Insecta	Diptera	Chironomidae	Limnophyes	Limnophyes sp. BIOUG02195-F12
ESV_337083	NCBI	100	KY830576	Eukaryota	Arthropoda	Insecta	Diptera	Chironomidae	Limnophyes	Limnophyes sp. BIOUG02195-G02
ESV_337083	NCBI	100	KY832616	Eukaryota	Arthropoda	Insecta	Diptera	Chironomidae	Limnophyes	Limnophyes sp. BIOUG02195-G03
ESV_337083	NCBI	100	KY834360	Eukaryota	Arthropoda	Insecta	Diptera	Chironomidae	Limnophyes	Limnophyes sp. BIOUG02196-E10
ESV_337083	NCBI	100	KY844915	Eukaryota	Arthropoda	Insecta	Diptera	Chironomidae	Limnophyes	Limnophyes sp. BIOUG02196-G07
ESV_337083	NCBI	100	KY844434	Eukaryota	Arthropoda	Insecta	Diptera	Chironomidae	Limnophyes	Limnophyes sp. BIOUG02196-G09
ESV_337083	NCBI	100	KY833563	Eukaryota	Arthropoda	Insecta	Diptera	Chironomidae	Limnophyes	Limnophyes sp. BIOUG02197-A06
ESV_337083	NCBI	100	KY847071	Eukaryota	Arthropoda	Insecta	Diptera	Chironomidae	Limnophyes	Limnophyes sp. BIOUG02204-B09
ESV_337083	NCBI	100	KY831493	Eukaryota	Arthropoda	Insecta	Diptera	Chironomidae	Limnophyes	Limnophyes sp. BIOUG02204-E09
ESV_337083	NCBI	100	KY835954	Eukaryota	Arthropoda	Insecta	Diptera	Chironomidae	Limnophyes	Limnophyes sp. BIOUG02204-H01
ESV_337083	NCBI	100	KY831833	Eukaryota	Arthropoda	Insecta	Diptera	Chironomidae	Limnophyes	Limnophyes sp. BIOUG02205-A04
ESV_337083	NCBI	100	KY834295	Eukaryota	Arthropoda	Insecta	Diptera	Chironomidae	Limnophyes	Limnophyes sp. BIOUG02205-A08
ESV_337083	NCBI	100	KY835181	Eukaryota	Arthropoda	Insecta	Diptera	Chironomidae	Limnophyes	Limnophyes sp. BIOUG02205-B03
ESV_337083	NCBI	100	KY846186	Eukaryota	Arthropoda	Insecta	Diptera	Chironomidae	Limnophyes	Limnophyes sp. BIOUG02205-B11
ESV_337083	NCBI	100	KY833320	Eukaryota	Arthropoda	Insecta	Diptera	Chironomidae	Limnophyes	Limnophyes sp. BIOUG02205-C03
ESV_337083	NCBI	100	KY834267	Eukaryota	Arthropoda	Insecta	Diptera	Chironomidae	Limnophyes	Limnophyes sp. BIOUG02205-C04
ESV_337083	NCBI	100	KY835238	Eukaryota	Arthropoda	Insecta	Diptera	Chironomidae	Limnophyes	Limnophyes sp. BIOUG02205-C07
ESV_337083	NCBI	100	KY832375	Eukaryota	Arthropoda	Insecta	Diptera	Chironomidae	Limnophyes	Limnophyes sp. BIOUG02205-C12
ESV_337083	NCBI	100	KY832628	Eukaryota	Arthropoda	Insecta	Diptera	Chironomidae	Limnophyes	Limnophyes sp. BIOUG02205-D11
ESV_337083	NCBI	100	KY830080	Eukaryota	Arthropoda	Insecta	Diptera	Chironomidae	Limnophyes	Limnophyes sp. BIOUG02205-E02
ESV_337083	NCBI	100	KY832388	Eukaryota	Arthropoda	Insecta	Diptera	Chironomidae	Limnophyes	Limnophyes sp. BIOUG02205-E03
ESV_337083	NCBI	100	KY846123	Eukaryota	Arthropoda	Insecta	Diptera	Chironomidae	Limnophyes	Limnophyes sp. BIOUG02205-F04
ESV_337083	NCBI	100	KY844344	Eukaryota	Arthropoda	Insecta	Diptera	Chironomidae	Limnophyes	Limnophyes sp. BIOUG02205-F11
ESV_337083	NCBI	100	KY844437	Eukaryota	Arthropoda	Insecta	Diptera	Chironomidae	Limnophyes	Limnophyes sp. BIOUG02206-C05
ESV_337083	NCBI	100	KY844979	Eukaryota	Arthropoda	Insecta	Diptera	Chironomidae	Limnophyes	Limnophyes sp. BIOUG02207-E07
ESV_337083	NCBI	100	KY845296	Eukaryota	Arthropoda	Insecta	Diptera	Chironomidae	Limnophyes	Limnophyes sp. BIOUG02207-G01
ESV_337083	NCBI	100	KY846456	Eukaryota	Arthropoda	Insecta	Diptera	Chironomidae	Limnophyes	Limnophyes sp. BIOUG02207-H01
ESV_337083	NCBI	100	KY834415	Eukaryota	Arthropoda	Insecta	Diptera	Chironomidae	Limnophyes	Limnophyes sp. BIOUG02208-E05
ESV_337083	NCBI	100	KY843705	Eukaryota	Arthropoda	Insecta	Diptera	Chironomidae	Limnophyes	Limnophyes sp. BIOUG02387-A05
ESV_337083	NCBI	100	KY845646	Eukaryota	Arthropoda	Insecta	Diptera	Chironomidae	Limnophyes	Limnophyes sp. BIOUG02388-F04
ESV_337083	NCBI	100	KY845568	Eukaryota	Arthropoda	Insecta	Diptera	Chironomidae	Limnophyes	Limnophyes sp. BIOUG02389-A01
ESV_337083	NCBI	100	KY845401	Eukaryota	Arthropoda	Insecta	Diptera	Chironomidae	Limnophyes	Limnophyes sp. BIOUG02389-A07
ESV_337083	NCBI	100	KY843620	Eukaryota	Arthropoda	Insecta	Diptera	Chironomidae	Limnophyes	Limnophyes sp. BIOUG02389-F03
ESV_337083	NCBI	100	KY844723	Eukaryota	Arthropoda	Insecta	Diptera	Chironomidae	Limnophyes	Limnophyes sp. BIOUG02390-A01
ESV_337083	NCBI	100	KY830082	Eukaryota	Arthropoda	Insecta	Diptera	Chironomidae	Limnophyes	Limnophyes sp. BIOUG02394-B04
ESV_337083	NCBI	100	KY847184	Eukaryota	Arthropoda	Insecta	Diptera	Chironomidae	Limnophyes	Limnophyes sp. BIOUG02396-D06
ESV_337083	NCBI	100	KY831181	Eukaryota	Arthropoda	Insecta	Diptera	Chironomidae	Limnophyes	Limnophyes sp. BIOUG02396-F08
ESV_337083	NCBI	100	KY844361	Eukaryota	Arthropoda	Insecta	Diptera	Chironomidae	Limnophyes	Limnophyes sp. BIOUG02402-E09
ESV_337083	NCBI	100	KY845015	Eukaryota	Arthropoda	Insecta	Diptera	Chironomidae	Limnophyes	Limnophyes sp. BIOUG02402-G08
ESV_337083	NCBI	100	KY830982	Eukaryota	Arthropoda	Insecta	Diptera	Chironomidae	Limnophyes	Limnophyes sp. BIOUG02431-B06
ESV_342280	NCBI	100	NC_063826	Eukaryota	Arthropoda	Insecta	Coleoptera	Dermestidae	Anthrenus	Anthrenus museorum
ESV_342280	NCBI	100	KX087239	Eukaryota	Arthropoda	Insecta	Coleoptera	Dermestidae	Anthrenus	Anthrenus verbasci
ESV_342508	NCBI	100	KU543655	Eukaryota	Arthropoda	Insecta	Blattodea	Blattidae	Periplaneta	Periplaneta americana
ESV_343274	NCBI	100	MG060181	Eukaryota	Arthropoda	Insecta	Coleoptera	Corylophidae	Orthoperus	Orthoperus scutellaris
ESV_343280	NCBI	100	GQ465336	Eukaryota	Arthropoda	Arachnida	Sarcoptiformes	Pyroglyphidae	Dermatophagoides	Dermatophagoides farinae
ESV_343280	NCBI	100	MK714180	Eukaryota	Arthropoda	Arachnida	Sarcoptiformes	Pyroglyphidae	Dermatophagoides	Dermatophagoides sp. HN_1
ESV_343280	NCBI	100	MK714190	Eukaryota	Arthropoda	Arachnida	Sarcoptiformes	Pyroglyphidae	Dermatophagoides	Dermatophagoides sp. HN_11
ESV_343280	NCBI	100	MK714191	Eukaryota	Arthropoda	Arachnida	Sarcoptiformes	Pyroglyphidae	Dermatophagoides	Dermatophagoides sp. HN_12
ESV_343280	NCBI	100	MK714181	Eukaryota	Arthropoda	Arachnida	Sarcoptiformes	Pyroglyphidae	Dermatophagoides	Dermatophagoides sp. HN_2
ESV_343280	NCBI	100	MK714182	Eukaryota	Arthropoda	Arachnida	Sarcoptiformes	Pyroglyphidae	Dermatophagoides	Dermatophagoides sp. HN_3
ESV_343280	NCBI	100	MK714183	Eukaryota	Arthropoda	Arachnida	Sarcoptiformes	Pyroglyphidae	Dermatophagoides	Dermatophagoides sp. HN_4
ESV_343280	NCBI	100	MK714184	Eukaryota	Arthropoda	Arachnida	Sarcoptiformes	Pyroglyphidae	Dermatophagoides	Dermatophagoides sp. HN_5
ESV_343280	NCBI	100	MK714185	Eukaryota	Arthropoda	Arachnida	Sarcoptiformes	Pyroglyphidae	Dermatophagoides	Dermatophagoides sp. HN_6
ESV_343280	NCBI	100	MK714186	Eukaryota	Arthropoda	Arachnida	Sarcoptiformes	Pyroglyphidae	Dermatophagoides	Dermatophagoides sp. HN_7
ESV_343280	NCBI	100	MK714187	Eukaryota	Arthropoda	Arachnida	Sarcoptiformes	Pyroglyphidae	Dermatophagoides	Dermatophagoides sp. HN_8
ESV_343280	NCBI	100	MK714188	Eukaryota	Arthropoda	Arachnida	Sarcoptiformes	Pyroglyphidae	Dermatophagoides	Dermatophagoides sp. HN_9
ESV_343280	NCBI	100	MK714163	Eukaryota	Arthropoda	Arachnida	Sarcoptiformes	Pyroglyphidae	Dermatophagoides	Dermatophagoides sp. SJZ_1
ESV_343280	NCBI	100	MK714164	Eukaryota	Arthropoda	Arachnida	Sarcoptiformes	Pyroglyphidae	Dermatophagoides	Dermatophagoides sp. SJZ_2
ESV_343280	NCBI	100	MK714165	Eukaryota	Arthropoda	Arachnida	Sarcoptiformes	Pyroglyphidae	Dermatophagoides	Dermatophagoides sp. SJZ_3
ESV_343280	NCBI	100	MK714169	Eukaryota	Arthropoda	Arachnida	Sarcoptiformes	Pyroglyphidae	Dermatophagoides	Dermatophagoides sp. SJZ_7
ESV_343280	NCBI	100	MK714193	Eukaryota	Arthropoda	Arachnida	Sarcoptiformes	Pyroglyphidae	Dermatophagoides	Dermatophagoides sp. WH_1
ESV_344045	NCBI	100	AB277218	Eukaryota	Arthropoda	Insecta	Thysanoptera	Thripidae	Frankliniella	Frankliniella fusca
ESV_344045	NCBI	100	HQ986425	Eukaryota	Arthropoda	Insecta	Thysanoptera	Thripidae	Frankliniella	Frankliniella sp. BOLD:AAL2817
ESV_344045	NCBI	100	JF429861	Eukaryota	Arthropoda	Insecta	Thysanoptera	Thripidae	Thrips	Thrips tabaci
ESV_346825	NCBI	98.7	KM114225	Eukaryota	Arthropoda	Arachnida	Trombidiformes	Demodicidae	Demodex	Demodex brevis
ESV_426556	NCBI	96.8	KF604932	Eukaryota	Arthropoda	Insecta	Hymenoptera	Formicidae	Tapinoma	Tapinoma sessile
ESV_426570	NCBI	100	MT181547	Eukaryota	Arthropoda	Insecta	Hymenoptera	Formicidae	Tapinoma	Tapinoma sessile
ESV_426583	NCBI	96.5	JN294308	Eukaryota	Arthropoda	Insecta	Hymenoptera	Formicidae	Tapinoma	Tapinoma sessile
ESV_426583	NCBI	95.5	KF605315	Eukaryota	Arthropoda	Insecta	Hymenoptera
ESV_426627	NCBI	94.6	KF605054	Eukaryota	Arthropoda	Insecta	Hymenoptera	Formicidae	Tapinoma	Tapinoma sessile
ESV_426830	BOLD	99	CRBAC10316-22	Animalia	Arthropoda	Insecta	Diptera	Cecidomyiidae
ESV_426881	BOLD	100	GBMWN506-15	Animalia	Arthropoda	Insecta	Diptera	Chironomidae	Tanytarsus	Tanytarsus volgensis
ESV_426915	BOLD	99.4	GMPAB816-18	Animalia	Arthropoda	Insecta	Diptera	Cecidomyiidae
ESV_426987	BOLD	99.7	GMPAD202-18	Animalia	Arthropoda	Insecta	Hemiptera
ESV_426987	BOLD	99.4	GMPAC986-18	Animalia	Arthropoda	Insecta	Diptera	Cecidomyiidae
ESV_426987	BOLD	99.4	GMPAC1324-18	Animalia	Arthropoda	Insecta	Diptera	Cecidomyiidae
ESV_426987	BOLD	99.4	GMPAU344-18	Animalia	Arthropoda	Insecta	Diptera	Cecidomyiidae
ESV_426987	BOLD	99	GMPAU277-18	Animalia	Arthropoda	Insecta	Diptera	Cecidomyiidae
ESV_427036	BOLD	100	CRBOE24888-23	Animalia	Arthropoda	Insecta	Diptera	Cecidomyiidae
ESV_427036	BOLD	100	CRBOE25393-23	Animalia	Arthropoda	Insecta	Diptera	Cecidomyiidae
ESV_427036	BOLD	100	CRBOE25322-23	Animalia	Arthropoda	Insecta	Diptera	Cecidomyiidae
ESV_427036	BOLD	100	CRBOE25486-23	Animalia	Arthropoda	Insecta	Diptera	Cecidomyiidae
ESV_427036	BOLD	100	CRBOE25358-23	Animalia	Arthropoda	Insecta	Diptera	Cecidomyiidae
ESV_427036	BOLD	100	CRBOE25681-23	Animalia	Arthropoda	Insecta	Diptera	Cecidomyiidae
ESV_427036	BOLD	100	CRBOE25970-23	Animalia	Arthropoda	Insecta	Diptera	Cecidomyiidae
ESV_427036	BOLD	100	CRBOE26151-23	Animalia	Arthropoda	Insecta	Diptera	Cecidomyiidae
ESV_427036	BOLD	100	CRBOE26253-23	Animalia	Arthropoda	Insecta	Diptera	Cecidomyiidae
ESV_427036	BOLD	100	CRBOE26184-23	Animalia	Arthropoda	Insecta	Diptera	Cecidomyiidae
ESV_427036	BOLD	100	CRBOE26193-23	Animalia	Arthropoda	Insecta	Diptera	Cecidomyiidae
ESV_427036	BOLD	100	CRBOE26406-23	Animalia	Arthropoda	Insecta	Diptera	Cecidomyiidae
ESV_427036	BOLD	100	CRBOE32341-23	Animalia	Arthropoda	Insecta	Diptera	Cecidomyiidae
ESV_427036	BOLD	100	CRBOE32481-23	Animalia	Arthropoda	Insecta	Diptera	Cecidomyiidae
ESV_427036	BOLD	100	CRBOE32930-23	Animalia	Arthropoda	Insecta	Diptera	Cecidomyiidae
ESV_427036	BOLD	100	CRBOE33076-23	Animalia	Arthropoda	Insecta	Diptera	Cecidomyiidae
ESV_427036	BOLD	100	CRBOE25183-23	Animalia	Arthropoda	Insecta	Diptera	Cecidomyiidae
ESV_427036	BOLD	100	CRBOE33374-23	Animalia	Arthropoda	Insecta	Diptera	Cecidomyiidae
ESV_427036	BOLD	100	CRBOE33625-23	Animalia	Arthropoda	Insecta	Diptera	Cecidomyiidae
ESV_427036	BOLD	100	CRBOE33704-23	Animalia	Arthropoda	Insecta	Diptera	Cecidomyiidae
ESV_427036	BOLD	100	CRBOE33790-23	Animalia	Arthropoda	Insecta	Diptera	Cecidomyiidae
ESV_427036	BOLD	100	CRBOE36077-23	Animalia	Arthropoda	Insecta	Diptera	Cecidomyiidae
ESV_427036	BOLD	100	CRBOE36118-23	Animalia	Arthropoda	Insecta	Diptera	Cecidomyiidae
ESV_427036	BOLD	100	CRBOE36289-23	Animalia	Arthropoda	Insecta	Diptera	Cecidomyiidae
ESV_427036	BOLD	100	CRBOF10773-24	Animalia	Arthropoda	Insecta	Diptera	Cecidomyiidae
ESV_427036	BOLD	100	CRBOF10932-24	Animalia	Arthropoda	Insecta	Diptera	Cecidomyiidae
ESV_427036	BOLD	100	CRBOF10052-24	Animalia	Arthropoda	Insecta	Diptera	Cecidomyiidae
ESV_427036	BOLD	100	CRBOF11448-24	Animalia	Arthropoda	Insecta	Diptera	Cecidomyiidae
ESV_427036	BOLD	100	CRBOF12293-24	Animalia	Arthropoda	Insecta	Diptera	Cecidomyiidae
ESV_427036	BOLD	100	CRBOF22380-24	Animalia	Arthropoda	Insecta	Diptera	Cecidomyiidae
ESV_427036	BOLD	100	CRBOF19864-24	Animalia	Arthropoda	Insecta	Diptera	Cecidomyiidae
ESV_427036	BOLD	100	CRBOF19955-24	Animalia	Arthropoda	Insecta	Diptera	Cecidomyiidae
ESV_427036	BOLD	100	CRBOF19227-24	Animalia	Arthropoda	Insecta	Diptera	Cecidomyiidae
ESV_427036	BOLD	100	CRBOF22668-24	Animalia	Arthropoda	Insecta	Diptera	Cecidomyiidae
ESV_427036	BOLD	100	CRBOF20900-24	Animalia	Arthropoda	Insecta	Diptera	Cecidomyiidae
ESV_427036	BOLD	100	CRBOF21816-24	Animalia	Arthropoda	Insecta	Diptera	Cecidomyiidae
ESV_427036	BOLD	100	CRBOF21033-24	Animalia	Arthropoda	Insecta	Diptera	Cecidomyiidae
ESV_427036	BOLD	100	CRBOF22034-24	Animalia	Arthropoda	Insecta	Diptera	Cecidomyiidae
ESV_427036	BOLD	100	CRBOF22033-24	Animalia	Arthropoda	Insecta	Diptera	Cecidomyiidae
ESV_427036	BOLD	100	CRBOF22106-24	Animalia	Arthropoda	Insecta	Diptera	Cecidomyiidae
ESV_427036	BOLD	100	CRBOF22133-24	Animalia	Arthropoda	Insecta	Diptera	Cecidomyiidae
ESV_427036	BOLD	100	CRBOF21238-24	Animalia	Arthropoda	Insecta	Diptera	Cecidomyiidae
ESV_427036	BOLD	100	CRBOF19633-24	Animalia	Arthropoda	Insecta	Diptera	Cecidomyiidae
ESV_427036	BOLD	100	CRBOF20349-24	Animalia	Arthropoda	Insecta	Diptera	Cecidomyiidae
ESV_427036	BOLD	100	CRBOF20411-24	Animalia	Arthropoda	Insecta	Diptera	Cecidomyiidae
ESV_427036	BOLD	100	CRBOF22246-24	Animalia	Arthropoda	Insecta	Diptera	Cecidomyiidae
ESV_427036	BOLD	100	CRBOF20498-24	Animalia	Arthropoda	Insecta	Diptera	Cecidomyiidae
ESV_427036	BOLD	100	CRBOF21476-24	Animalia	Arthropoda	Insecta	Diptera	Cecidomyiidae
ESV_427036	BOLD	100	CRBOF23634-24	Animalia	Arthropoda	Insecta	Diptera	Cecidomyiidae
ESV_427036	BOLD	100	CRBOF23836-24	Animalia	Arthropoda	Insecta	Diptera	Cecidomyiidae
ESV_427036	BOLD	100	CRBOF15984-24	Animalia	Arthropoda	Insecta	Diptera	Cecidomyiidae
ESV_427036	BOLD	100	CRBOF15446-24	Animalia	Arthropoda	Insecta	Diptera	Cecidomyiidae
ESV_427036	BOLD	100	CRBOF17238-24	Animalia	Arthropoda	Insecta	Diptera	Cecidomyiidae
ESV_427036	BOLD	100	CRBOF17410-24	Animalia	Arthropoda	Insecta	Diptera	Cecidomyiidae
ESV_427036	BOLD	100	CRBOF20458-24	Animalia	Arthropoda	Insecta	Diptera	Cecidomyiidae
ESV_427036	BOLD	100	CRBOF24055-24	Animalia	Arthropoda	Insecta	Diptera	Cecidomyiidae
ESV_427036	BOLD	100	CRBOF24156-24	Animalia	Arthropoda	Insecta	Diptera	Cecidomyiidae
ESV_427036	BOLD	100	CRBOF20253-24	Animalia	Arthropoda	Insecta	Diptera	Cecidomyiidae
ESV_427036	BOLD	100	CRBOF2451-23	Animalia	Arthropoda	Insecta	Diptera	Cecidomyiidae
ESV_427036	BOLD	100	CRBOF28639-24	Animalia	Arthropoda	Insecta	Diptera	Cecidomyiidae
ESV_427036	BOLD	100	CRBOF28690-24	Animalia	Arthropoda	Insecta	Diptera	Cecidomyiidae
ESV_427036	BOLD	100	CRBOF28857-24	Animalia	Arthropoda	Insecta	Diptera	Cecidomyiidae
ESV_427036	BOLD	100	CRBOF28892-24	Animalia	Arthropoda	Insecta	Diptera	Cecidomyiidae
ESV_427036	BOLD	100	CRBOF28948-24	Animalia	Arthropoda	Insecta	Diptera	Cecidomyiidae
ESV_427036	BOLD	100	CRBOF29975-24	Animalia	Arthropoda	Insecta	Diptera	Cecidomyiidae
ESV_427036	BOLD	100	CRBOF24341-24	Animalia	Arthropoda	Insecta	Diptera	Cecidomyiidae
ESV_427036	BOLD	100	CRBOF24399-24	Animalia	Arthropoda	Insecta	Diptera	Cecidomyiidae
ESV_427036	BOLD	100	CRBOF25174-24	Animalia	Arthropoda	Insecta	Diptera	Cecidomyiidae
ESV_427036	BOLD	100	CRBOF30196-24	Animalia	Arthropoda	Insecta	Diptera	Cecidomyiidae
ESV_427036	BOLD	100	CRBOF30234-24	Animalia	Arthropoda	Insecta	Diptera	Cecidomyiidae
ESV_427036	BOLD	100	CRBOF32804-24	Animalia	Arthropoda	Insecta	Diptera	Cecidomyiidae
ESV_427036	BOLD	100	CRBOF24294-24	Animalia	Arthropoda	Insecta	Diptera	Cecidomyiidae
ESV_427036	BOLD	100	CRBOF24466-24	Animalia	Arthropoda	Insecta	Diptera	Cecidomyiidae
ESV_427036	BOLD	100	CRBOF25730-24	Animalia	Arthropoda	Insecta	Diptera	Cecidomyiidae
ESV_427036	BOLD	100	CRBOF27252-24	Animalia	Arthropoda	Insecta	Diptera	Cecidomyiidae
ESV_427036	BOLD	100	CRBOF4370-23	Animalia	Arthropoda	Insecta	Diptera	Cecidomyiidae
ESV_427036	BOLD	100	CRBOF43315-24	Animalia	Arthropoda	Insecta	Diptera	Cecidomyiidae
ESV_427036	BOLD	100	CRBOF44682-24	Animalia	Arthropoda	Insecta	Diptera	Cecidomyiidae
ESV_427036	BOLD	100	CRBOF43478-24	Animalia	Arthropoda	Insecta	Diptera	Cecidomyiidae
ESV_427036	BOLD	100	CRBOF45055-24	Animalia	Arthropoda	Insecta	Diptera	Cecidomyiidae
ESV_427036	BOLD	100	CRBOF48088-24	Animalia	Arthropoda	Insecta	Diptera	Cecidomyiidae
ESV_427036	BOLD	100	CRBOF8089-23	Animalia	Arthropoda	Insecta	Diptera	Cecidomyiidae
ESV_427036	BOLD	100	CRBOF8108-23	Animalia	Arthropoda	Insecta	Diptera	Cecidomyiidae
ESV_427036	BOLD	100	CRBOF8454-23	Animalia	Arthropoda	Insecta	Diptera	Cecidomyiidae
ESV_427036	BOLD	100	CRBOF8807-24	Animalia	Arthropoda	Insecta	Diptera	Cecidomyiidae
ESV_427036	BOLD	100	CRBOH44805-24	Animalia	Arthropoda	Insecta	Diptera	Cecidomyiidae
ESV_427036	BOLD	100	CRBOE36508-23	Animalia	Arthropoda	Insecta	Diptera
ESV_427038	BOLD	100	CRTOD13944-23	Animalia	Arthropoda	Insecta	Diptera	Cecidomyiidae
ESV_427094	BOLD	98.1	CRSIA42130-22	Animalia	Arthropoda	Insecta	Diptera	Cecidomyiidae
ESV_427094	BOLD	97.8	CROCA23450-21	Animalia	Arthropoda	Insecta	Diptera	Cecidomyiidae
ESV_427094	BOLD	97.8	LPGEN42912-24	Animalia	Arthropoda	Insecta	Diptera	Cecidomyiidae
ESV_427094	BOLD	97.4	GMSPA15026-21	Animalia	Arthropoda	Insecta	Diptera	Cecidomyiidae
ESV_427094	BOLD	97.4	GMSPA28541-22	Animalia	Arthropoda	Insecta	Diptera	Cecidomyiidae
ESV_427094	BOLD	97.4	GMAFO120-15	Animalia	Arthropoda	Insecta	Diptera	Cecidomyiidae
ESV_427094	BOLD	97.4	GMAFU689-15	Animalia	Arthropoda	Insecta	Diptera	Cecidomyiidae
ESV_427094	BOLD	97.1	GMSPB40138-23	Animalia	Arthropoda	Insecta	Diptera	Cecidomyiidae
ESV_427094	BOLD	97.1	CRBLD27081-24	Animalia	Arthropoda	Insecta	Diptera	Cecidomyiidae
ESV_427094	BOLD	97.1	CRBOG4694-23	Animalia	Arthropoda	Insecta	Diptera	Cecidomyiidae
ESV_427094	BOLD	97.1	CRTOD17060-23	Animalia	Arthropoda	Insecta	Diptera	Cecidomyiidae
ESV_427094	BOLD	97.1	GMAFA164-15	Animalia	Arthropoda	Insecta	Diptera	Cecidomyiidae
ESV_427094	BOLD	97.1	GMAFZ624-15	Animalia	Arthropoda	Insecta	Diptera	Cecidomyiidae
ESV_427094	BOLD	97.1	LPGEN39342-24	Animalia	Arthropoda	Insecta	Diptera	Cecidomyiidae
ESV_427103	BOLD	99.4	GMPAQ271-18	Animalia	Arthropoda	Insecta	Diptera	Cecidomyiidae
ESV_427112	BOLD	98.4	GMPXB4923-23	Animalia	Arthropoda	Insecta	Diptera	Psychodidae	Trichomyia
ESV_427112	BOLD	98.1	SATHA13766-23	Animalia	Arthropoda	Insecta	Diptera	Psychodidae	Trichomyia
ESV_427112	BOLD	97.8	SATHA153-22	Animalia	Arthropoda	Insecta	Diptera	Psychodidae	Trichomyia
ESV_427112	BOLD	97.8	SATHA1717-22	Animalia	Arthropoda	Insecta	Diptera	Psychodidae	Trichomyia
ESV_427112	BOLD	97.8	SATHA12074-23	Animalia	Arthropoda	Insecta	Diptera	Psychodidae	Trichomyia
ESV_427112	BOLD	97.8	SATHA21876-23	Animalia	Arthropoda	Insecta	Diptera	Psychodidae	Trichomyia
ESV_427112	BOLD	97.8	SATHA26347-23	Animalia	Arthropoda	Insecta	Diptera	Psychodidae	Trichomyia
ESV_427112	BOLD	97.8	SATHA26296-23	Animalia	Arthropoda	Insecta	Diptera	Psychodidae	Trichomyia
ESV_427112	BOLD	97.4	SATHA16300-23	Animalia	Arthropoda	Insecta	Diptera	Psychodidae	Trichomyia
ESV_427112	BOLD	97.4	SATHA16609-23	Animalia	Arthropoda	Insecta	Diptera	Psychodidae	Trichomyia
ESV_427112	BOLD	97.4	SATHA26331-23	Animalia	Arthropoda	Insecta	Diptera	Psychodidae	Trichomyia
ESV_427112	BOLD	97.4	GMGRM10764-23	Animalia	Arthropoda	Insecta	Diptera	Psychodidae	Trichomyia
ESV_427206	BOLD	100	CRTOD2995-23	Animalia	Arthropoda	Insecta	Diptera	Cecidomyiidae
ESV_427208	BOLD	100	ASDEM201-21	Animalia	Arthropoda	Arachnida	Trombidiformes	Demodicidae	Demodex	Demodex folliculorum
ESV_427229	BOLD	98.4	CRBLD27874-24	Animalia	Arthropoda	Insecta	Diptera	Cecidomyiidae
ESV_427229	BOLD	98.4	CRBOB19884-23	Animalia	Arthropoda	Insecta	Diptera	Cecidomyiidae
ESV_427229	BOLD	98.4	CRBOF19863-24	Animalia	Arthropoda	Insecta	Diptera	Cecidomyiidae
ESV_427229	BOLD	98.4	CRBOF37511-24	Animalia	Arthropoda	Insecta	Diptera	Cecidomyiidae
ESV_427229	BOLD	98.4	CRBOG6156-23	Animalia	Arthropoda	Insecta	Diptera	Cecidomyiidae
ESV_427229	BOLD	98.4	CRBOH22771-24	Animalia	Arthropoda	Insecta	Diptera	Cecidomyiidae
ESV_427229	BOLD	98.4	CRBOI8102-24	Animalia	Arthropoda	Insecta	Diptera	Cecidomyiidae
ESV_427229	BOLD	98.4	CRBOI5583-24	Animalia	Arthropoda	Insecta	Diptera	Cecidomyiidae
ESV_427229	BOLD	98.4	CRBTA17721-24	Animalia	Arthropoda	Insecta	Diptera	Cecidomyiidae
ESV_427229	BOLD	98.4	CRBTA19842-24	Animalia	Arthropoda	Insecta	Diptera	Cecidomyiidae
ESV_427229	BOLD	98.4	CRBTA25178-24	Animalia	Arthropoda	Insecta	Diptera	Cecidomyiidae
ESV_427229	BOLD	98.4	CRBTA29691-24	Animalia	Arthropoda	Insecta	Diptera	Cecidomyiidae
ESV_427229	BOLD	98.4	CRBTA29936-24	Animalia	Arthropoda	Insecta	Diptera	Cecidomyiidae
ESV_427229	BOLD	98.4	CRBTA44593-24	Animalia	Arthropoda	Insecta	Diptera	Cecidomyiidae
ESV_427229	BOLD	98.4	CRBTB2042-24	Animalia	Arthropoda	Insecta	Diptera	Cecidomyiidae
ESV_427229	BOLD	98.4	CRBTB21047-24	Animalia	Arthropoda	Insecta	Diptera	Cecidomyiidae
ESV_427229	BOLD	98.4	CRBTB26001-24	Animalia	Arthropoda	Insecta	Diptera	Cecidomyiidae
ESV_427229	BOLD	98.4	CRBTB4947-24	Animalia	Arthropoda	Insecta	Diptera	Cecidomyiidae
ESV_427229	BOLD	98.4	CRCBC28692-23	Animalia	Arthropoda	Insecta	Diptera	Cecidomyiidae
ESV_427229	BOLD	98.4	CRCBD23801-23	Animalia	Arthropoda	Insecta	Diptera	Cecidomyiidae
ESV_427229	BOLD	98.4	CRCCE1253-23	Animalia	Arthropoda	Insecta	Diptera	Cecidomyiidae
ESV_427229	BOLD	98.4	CRCCD9999-23	Animalia	Arthropoda	Insecta	Diptera	Cecidomyiidae
ESV_427229	BOLD	98.4	CRCEA41367-22	Animalia	Arthropoda	Insecta	Diptera	Cecidomyiidae
ESV_427229	BOLD	98.4	CRLDD24690-24	Animalia	Arthropoda	Insecta	Diptera	Cecidomyiidae
ESV_427229	BOLD	98.4	CRPTA16885-24	Animalia	Arthropoda	Insecta	Diptera	Cecidomyiidae
ESV_427229	BOLD	98.4	CRPTB9352-24	Animalia	Arthropoda	Insecta	Diptera	Cecidomyiidae
ESV_427229	BOLD	98.4	CRPTC47662-25	Animalia	Arthropoda	Insecta	Diptera	Cecidomyiidae
ESV_427229	BOLD	98.4	CRPTC50337-25	Animalia	Arthropoda	Insecta	Diptera	Cecidomyiidae
ESV_427229	BOLD	98.4	CRPTD24113-25	Animalia	Arthropoda	Insecta	Diptera	Cecidomyiidae
ESV_427229	BOLD	98.4	CRPTD24853-25	Animalia	Arthropoda	Insecta	Diptera	Cecidomyiidae
ESV_427229	BOLD	98.4	CRPTD32602-25	Animalia	Arthropoda	Insecta	Diptera	Cecidomyiidae
ESV_427229	BOLD	98.4	CRPTD832-25	Animalia	Arthropoda	Insecta	Diptera	Cecidomyiidae
ESV_427229	BOLD	98.4	CRSGC30478-23	Animalia	Arthropoda	Insecta	Diptera	Cecidomyiidae
ESV_427229	BOLD	98.4	CRSGD13133-24	Animalia	Arthropoda	Insecta	Diptera	Cecidomyiidae
ESV_427229	BOLD	98.4	CRSGD13993-24	Animalia	Arthropoda	Insecta	Diptera	Cecidomyiidae
ESV_427229	BOLD	98.4	CRSGD16952-24	Animalia	Arthropoda	Insecta	Diptera	Cecidomyiidae
ESV_427229	BOLD	98.4	CRTOD13123-23	Animalia	Arthropoda	Insecta	Diptera	Cecidomyiidae
ESV_427229	BOLD	98.4	CRTOD7419-23	Animalia	Arthropoda	Insecta	Diptera	Cecidomyiidae
ESV_427229	BOLD	98.4	CRTOD7746-23	Animalia	Arthropoda	Insecta	Diptera	Cecidomyiidae
ESV_427229	BOLD	98.4	ONTA25594-23	Animalia	Arthropoda	Insecta	Diptera	Cecidomyiidae
ESV_427229	BOLD	98.4	ONTA9186-23	Animalia	Arthropoda	Insecta	Diptera	Cecidomyiidae
ESV_427229	BOLD	98.4	ONTB33943-23	Animalia	Arthropoda	Insecta	Diptera	Cecidomyiidae
ESV_427229	BOLD	98.4	ONTB44071-23	Animalia	Arthropoda	Insecta	Diptera	Cecidomyiidae
ESV_427229	BOLD	98.1	CRTRB12836-22	Animalia	Arthropoda	Insecta	Diptera	Cecidomyiidae
ESV_427229	BOLD	98.1	CRCBB22718-23	Animalia	Arthropoda	Insecta	Diptera	Cecidomyiidae
ESV_427229	BOLD	98.1	CRBOA34806-23	Animalia	Arthropoda	Insecta	Diptera	Cecidomyiidae
ESV_427229	BOLD	98.1	CRBOA44969-23	Animalia	Arthropoda	Insecta	Diptera	Cecidomyiidae
ESV_427229	BOLD	98.1	CRBOA9685-23	Animalia	Arthropoda	Insecta	Diptera	Cecidomyiidae
ESV_427229	BOLD	98.1	CRCEB11269-22	Animalia	Arthropoda	Insecta	Diptera	Cecidomyiidae
ESV_427229	BOLD	98.1	CRCEB1847-22	Animalia	Arthropoda	Insecta	Diptera	Cecidomyiidae
ESV_427229	BOLD	98.1	CRCEB35873-22	Animalia	Arthropoda	Insecta	Diptera	Cecidomyiidae
ESV_427229	BOLD	98.1	CRCEC20776-22	Animalia	Arthropoda	Insecta	Diptera	Cecidomyiidae
ESV_427229	BOLD	98.1	CRCEC7715-22	Animalia	Arthropoda	Insecta	Diptera	Cecidomyiidae
ESV_427229	BOLD	98.1	PLFDJ350-20	Animalia	Arthropoda	Insecta	Diptera	Cecidomyiidae
ESV_427229	BOLD	98.1	CRCEA23323-22	Animalia	Arthropoda	Insecta	Diptera	Cecidomyiidae
ESV_427229	BOLD	98.1	CRCEA2979-21	Animalia	Arthropoda	Insecta	Diptera	Cecidomyiidae
ESV_427229	BOLD	98.1	CRCED19224-23	Animalia	Arthropoda	Insecta	Diptera	Cecidomyiidae
ESV_427229	BOLD	98.1	CRHYA33350-22	Animalia	Arthropoda	Insecta	Diptera	Cecidomyiidae
ESV_427229	BOLD	98.1	CRTOD12934-23	Animalia	Arthropoda	Insecta	Diptera	Cecidomyiidae
ESV_427229	BOLD	98.1	ONTA47882-23	Animalia	Arthropoda	Insecta	Diptera	Cecidomyiidae
ESV_427229	BOLD	98.1	ONTB559-23	Animalia	Arthropoda	Insecta	Diptera	Cecidomyiidae
ESV_427229	BOLD	97.8	CRBOA2783-23	Animalia	Arthropoda	Insecta	Diptera	Cecidomyiidae
ESV_427229	BOLD	97.8	CRBOA33523-23	Animalia	Arthropoda	Insecta	Diptera	Cecidomyiidae
ESV_427229	BOLD	97.8	CRBOA34212-23	Animalia	Arthropoda	Insecta	Diptera	Cecidomyiidae
ESV_427229	BOLD	97.8	CRCBA28153-22	Animalia	Arthropoda	Insecta	Diptera	Cecidomyiidae
ESV_427229	BOLD	97.8	CRCEA17472-21	Animalia	Arthropoda	Insecta	Diptera	Cecidomyiidae
ESV_427229	BOLD	97.8	CRCEA2101-21	Animalia	Arthropoda	Insecta	Diptera	Cecidomyiidae
ESV_427229	BOLD	97.8	CRCEA32779-22	Animalia	Arthropoda	Insecta	Diptera	Cecidomyiidae
ESV_427229	BOLD	97.8	CRCEA4285-21	Animalia	Arthropoda	Insecta	Diptera	Cecidomyiidae
ESV_427229	BOLD	97.8	CRCEA6335-21	Animalia	Arthropoda	Insecta	Diptera	Cecidomyiidae
ESV_427229	BOLD	97.8	CRCEA53895-22	Animalia	Arthropoda	Insecta	Diptera	Cecidomyiidae
ESV_427229	BOLD	97.8	CRCEB33774-22	Animalia	Arthropoda	Insecta	Diptera	Cecidomyiidae
ESV_427229	BOLD	97.8	CRCEC10967-22	Animalia	Arthropoda	Insecta	Diptera	Cecidomyiidae
ESV_427229	BOLD	97.8	CRCEC13437-22	Animalia	Arthropoda	Insecta	Diptera	Cecidomyiidae
ESV_427229	BOLD	97.8	CRCEC19336-22	Animalia	Arthropoda	Insecta	Diptera	Cecidomyiidae
ESV_427229	BOLD	97.8	CRTOA44229-22	Animalia	Arthropoda	Insecta	Diptera	Cecidomyiidae
ESV_427229	BOLD	97.8	CRTRA31435-22	Animalia	Arthropoda	Insecta	Diptera	Cecidomyiidae
ESV_427229	BOLD	97.8	CRTRA56397-22	Animalia	Arthropoda	Insecta	Diptera	Cecidomyiidae
ESV_427229	BOLD	97.8	CRBAA6406-22	Animalia	Arthropoda	Insecta	Diptera	Cecidomyiidae
ESV_427229	BOLD	97.8	CRBLA2189-22	Animalia	Arthropoda	Insecta	Diptera	Cecidomyiidae
ESV_427229	BOLD	97.8	CRHYA7182-22	Animalia	Arthropoda	Insecta	Diptera	Cecidomyiidae
ESV_427229	BOLD	97.8	CRSIA35299-22	Animalia	Arthropoda	Insecta	Diptera	Cecidomyiidae
ESV_427229	BOLD	97.8	CRTRA3599-22	Animalia	Arthropoda	Insecta	Diptera	Cecidomyiidae
ESV_427229	BOLD	97.4	CRBOA19481-23	Animalia	Arthropoda	Insecta	Diptera	Cecidomyiidae
ESV_427229	BOLD	97.4	CRBOA29233-23	Animalia	Arthropoda	Insecta	Diptera	Cecidomyiidae
ESV_427229	BOLD	97.4	CRBLA2274-22	Animalia	Arthropoda	Insecta	Diptera	Cecidomyiidae
ESV_427229	BOLD	97.4	CRBLB9463-22	Animalia	Arthropoda	Insecta	Diptera	Cecidomyiidae
ESV_427229	BOLD	97.4	CRCBB49425-23	Animalia	Arthropoda	Insecta	Diptera	Cecidomyiidae
ESV_427229	BOLD	97.4	CRHTA41407-22	Animalia	Arthropoda	Insecta	Diptera	Cecidomyiidae
ESV_427229	BOLD	97.4	CRHYA29003-22	Animalia	Arthropoda	Insecta	Diptera	Cecidomyiidae
ESV_427229	BOLD	97.4	CROAB45561-21	Animalia	Arthropoda	Insecta	Diptera	Cecidomyiidae
ESV_427229	BOLD	97.4	CROCA24190-21	Animalia	Arthropoda	Insecta	Diptera	Cecidomyiidae
ESV_427229	BOLD	97.4	CROCA29109-21	Animalia	Arthropoda	Insecta	Diptera	Cecidomyiidae
ESV_427229	BOLD	97.4	CRTOA17312-21	Animalia	Arthropoda	Insecta	Diptera	Cecidomyiidae
ESV_427229	BOLD	97.4	CRCEA13197-21	Animalia	Arthropoda	Insecta	Hemiptera
ESV_427269	BOLD	99	GMPAI382-18	Animalia	Arthropoda	Insecta	Diptera	Cecidomyiidae
ESV_427269	BOLD	99	GMPAN457-18	Animalia	Arthropoda	Insecta	Diptera	Cecidomyiidae
ESV_427269	BOLD	98.7	GMPAN937-18	Animalia	Arthropoda	Insecta	Diptera	Cecidomyiidae
ESV_427352	BOLD	99.4	GMPAH180-18	Animalia	Arthropoda	Insecta	Diptera	Cecidomyiidae
ESV_427367	BOLD	98.7	PLBDA172-20	Animalia	Arthropoda	Insecta	Diptera	Cecidomyiidae
ESV_427367	BOLD	98.7	PLRAY040-20	Animalia	Arthropoda	Insecta	Diptera	Cecidomyiidae
ESV_427367	BOLD	98.7	PLRAY049-20	Animalia	Arthropoda	Insecta	Diptera	Cecidomyiidae
ESV_427367	BOLD	98.7	PLRAZ127-20	Animalia	Arthropoda	Insecta	Diptera	Cecidomyiidae
ESV_427367	BOLD	98.7	PLSBC768-20	Animalia	Arthropoda	Insecta	Diptera	Cecidomyiidae
ESV_427367	BOLD	98.7	PLTAY038-20	Animalia	Arthropoda	Insecta	Diptera	Cecidomyiidae
ESV_427367	BOLD	98.7	PLTAZ131-20	Animalia	Arthropoda	Insecta	Diptera	Cecidomyiidae
ESV_427367	BOLD	98.7	PLTAZ141-20	Animalia	Arthropoda	Insecta	Diptera	Cecidomyiidae
ESV_427367	BOLD	98.7	PLTAZ061-20	Animalia	Arthropoda	Insecta	Diptera	Cecidomyiidae
ESV_427367	BOLD	98.7	PLTAZ074-20	Animalia	Arthropoda	Insecta	Diptera	Cecidomyiidae
ESV_427367	BOLD	98.7	PLXDC1522-20	Animalia	Arthropoda	Insecta	Diptera	Cecidomyiidae
ESV_427367	BOLD	98.4	PLQCZ169-20	Animalia	Arthropoda	Insecta	Diptera	Cecidomyiidae
ESV_427367	BOLD	98.4	PLXDC2313-20	Animalia	Arthropoda	Insecta	Diptera	Cecidomyiidae
ESV_427367	BOLD	98.4	CROAB27662-21	Animalia	Arthropoda	Insecta	Diptera	Cecidomyiidae
ESV_427367	BOLD	98.4	CROAB3954-21	Animalia	Arthropoda	Insecta	Diptera	Cecidomyiidae
ESV_427367	BOLD	98.4	CROAB4871-21	Animalia	Arthropoda	Insecta	Diptera	Cecidomyiidae
ESV_427367	BOLD	98.4	CROZA1033-21	Animalia	Arthropoda	Insecta	Diptera	Cecidomyiidae
ESV_427367	BOLD	98.4	PLAAY566-18	Animalia	Arthropoda	Insecta	Diptera	Cecidomyiidae
ESV_427367	BOLD	98.4	PLADD287-20	Animalia	Arthropoda	Insecta	Diptera	Cecidomyiidae
ESV_427367	BOLD	98.4	PLADB528-20	Animalia	Arthropoda	Insecta	Diptera	Cecidomyiidae
ESV_427367	BOLD	98.4	PLCFA218-21	Animalia	Arthropoda	Insecta	Diptera	Cecidomyiidae
ESV_427367	BOLD	98.4	PLCFD462-21	Animalia	Arthropoda	Insecta	Diptera	Cecidomyiidae
ESV_427367	BOLD	98.4	PLDBA145-19	Animalia	Arthropoda	Insecta	Diptera	Cecidomyiidae
ESV_427367	BOLD	98.4	PLIDB074-20	Animalia	Arthropoda	Insecta	Diptera	Cecidomyiidae
ESV_427367	BOLD	98.4	PLOAY120-20	Animalia	Arthropoda	Insecta	Diptera	Cecidomyiidae
ESV_427367	BOLD	98.4	PLOAY131-20	Animalia	Arthropoda	Insecta	Diptera	Cecidomyiidae
ESV_427367	BOLD	98.4	PLOAZ900-20	Animalia	Arthropoda	Insecta	Diptera	Cecidomyiidae
ESV_427367	BOLD	98.4	PLRAY037-20	Animalia	Arthropoda	Insecta	Diptera	Cecidomyiidae
ESV_427367	BOLD	98.4	PLRAY045-20	Animalia	Arthropoda	Insecta	Diptera	Cecidomyiidae
ESV_427367	BOLD	98.4	PLRAY056-20	Animalia	Arthropoda	Insecta	Diptera	Cecidomyiidae
ESV_427367	BOLD	98.4	PLRAX125-20	Animalia	Arthropoda	Insecta	Diptera	Cecidomyiidae
ESV_427367	BOLD	98.4	PLRAY060-20	Animalia	Arthropoda	Insecta	Diptera	Cecidomyiidae
ESV_427367	BOLD	98.4	PLRAZ175-20	Animalia	Arthropoda	Insecta	Diptera	Cecidomyiidae
ESV_427367	BOLD	98.4	PLRAZ194-20	Animalia	Arthropoda	Insecta	Diptera	Cecidomyiidae
ESV_427367	BOLD	98.4	PLRAZ196-20	Animalia	Arthropoda	Insecta	Diptera	Cecidomyiidae
ESV_427367	BOLD	98.4	PLRAZ205-20	Animalia	Arthropoda	Insecta	Diptera	Cecidomyiidae
ESV_427367	BOLD	98.4	PLRAZ093-20	Animalia	Arthropoda	Insecta	Diptera	Cecidomyiidae
ESV_427367	BOLD	98.4	PLRAZ248-20	Animalia	Arthropoda	Insecta	Diptera	Cecidomyiidae
ESV_427367	BOLD	98.4	PLRAZ251-20	Animalia	Arthropoda	Insecta	Diptera	Cecidomyiidae
ESV_427367	BOLD	98.4	PLRAZ132-20	Animalia	Arthropoda	Insecta	Diptera	Cecidomyiidae
ESV_427367	BOLD	98.4	PLRAZ146-20	Animalia	Arthropoda	Insecta	Diptera	Cecidomyiidae
ESV_427367	BOLD	98.4	PLRBC114-20	Animalia	Arthropoda	Insecta	Diptera	Cecidomyiidae
ESV_427367	BOLD	98.4	PLRBD173-20	Animalia	Arthropoda	Insecta	Diptera	Cecidomyiidae
ESV_427367	BOLD	98.4	PLRCY254-20	Animalia	Arthropoda	Insecta	Diptera	Cecidomyiidae
ESV_427367	BOLD	98.4	PLRDB142-20	Animalia	Arthropoda	Insecta	Diptera	Cecidomyiidae
ESV_427367	BOLD	98.4	PLTAZ132-20	Animalia	Arthropoda	Insecta	Diptera	Cecidomyiidae
ESV_427367	BOLD	98.4	PLTAZ152-20	Animalia	Arthropoda	Insecta	Diptera	Cecidomyiidae
ESV_427367	BOLD	98.4	PLTAZ078-20	Animalia	Arthropoda	Insecta	Diptera	Cecidomyiidae
ESV_427367	BOLD	98.4	PLTAZ100-20	Animalia	Arthropoda	Insecta	Diptera	Cecidomyiidae
ESV_427367	BOLD	98.4	PLTAZ591-20	Animalia	Arthropoda	Insecta	Diptera	Cecidomyiidae
ESV_427367	BOLD	98.4	PLTBA205-20	Animalia	Arthropoda	Insecta	Diptera	Cecidomyiidae
ESV_427367	BOLD	98.4	PLTBC027-20	Animalia	Arthropoda	Insecta	Diptera	Cecidomyiidae
ESV_427367	BOLD	98.4	PLTBC148-20	Animalia	Arthropoda	Insecta	Diptera	Cecidomyiidae
ESV_427367	BOLD	98.4	PLVBB323-20	Animalia	Arthropoda	Insecta	Diptera	Cecidomyiidae
ESV_427367	BOLD	98.4	PLWDA260-21	Animalia	Arthropoda	Insecta	Diptera	Cecidomyiidae
ESV_427367	BOLD	98.4	PLRAY061-20	Animalia	Arthropoda	Insecta	Diptera	Cecidomyiidae
ESV_427367	BOLD	98.4	PLTAZ133-20	Animalia	Arthropoda	Insecta	Diptera	Cecidomyiidae
ESV_427367	BOLD	98.4	PLTAZ070-20	Animalia	Arthropoda	Insecta	Diptera	Cecidomyiidae
ESV_427367	BOLD	98.4	PLTAZ085-20	Animalia	Arthropoda	Insecta	Diptera	Cecidomyiidae
ESV_427367	BOLD	98.1	CROAB4279-21	Animalia	Arthropoda	Insecta	Diptera	Cecidomyiidae
ESV_427367	BOLD	98.1	CROAB46540-21	Animalia	Arthropoda	Insecta	Diptera	Cecidomyiidae
ESV_427367	BOLD	98.1	CROCA8884-21	Animalia	Arthropoda	Insecta	Diptera	Cecidomyiidae
ESV_427367	BOLD	98.1	CROCB4602-22	Animalia	Arthropoda	Insecta	Diptera	Cecidomyiidae
ESV_427367	BOLD	98.1	CRSRA12050-22	Animalia	Arthropoda	Insecta	Diptera	Cecidomyiidae
ESV_427367	BOLD	98.1	PLBDA175-20	Animalia	Arthropoda	Insecta	Diptera	Cecidomyiidae
ESV_427367	BOLD	98.1	PLGCZ156-20	Animalia	Arthropoda	Insecta	Diptera	Cecidomyiidae
ESV_427367	BOLD	98.1	PLHBD223-19	Animalia	Arthropoda	Insecta	Diptera	Cecidomyiidae
ESV_427367	BOLD	98.1	PLJBE291-20	Animalia	Arthropoda	Insecta	Diptera	Cecidomyiidae
ESV_427367	BOLD	98.1	PLLBB688-20	Animalia	Arthropoda	Insecta	Diptera	Cecidomyiidae
ESV_427367	BOLD	98.1	PLMAY174-20	Animalia	Arthropoda	Insecta	Diptera	Cecidomyiidae
ESV_427367	BOLD	98.1	PLMAZ397-20	Animalia	Arthropoda	Insecta	Diptera	Cecidomyiidae
ESV_427367	BOLD	98.1	PLOAY153-20	Animalia	Arthropoda	Insecta	Diptera	Cecidomyiidae
ESV_427367	BOLD	98.1	PLRAZ148-20	Animalia	Arthropoda	Insecta	Diptera	Cecidomyiidae
ESV_427367	BOLD	98.1	PLRBB091-20	Animalia	Arthropoda	Insecta	Diptera	Cecidomyiidae
ESV_427367	BOLD	98.1	PLRBC156-20	Animalia	Arthropoda	Insecta	Diptera	Cecidomyiidae
ESV_427367	BOLD	98.1	CROAB27885-21	Animalia	Arthropoda	Insecta	Diptera	Cecidomyiidae
ESV_427367	BOLD	98.1	CROAB50848-21	Animalia	Arthropoda	Insecta	Diptera	Cecidomyiidae
ESV_427367	BOLD	98.1	CROAB51167-21	Animalia	Arthropoda	Insecta	Diptera	Cecidomyiidae
ESV_427367	BOLD	98.1	CROAB5328-21	Animalia	Arthropoda	Insecta	Diptera	Cecidomyiidae
ESV_427367	BOLD	98.1	CROCA12436-21	Animalia	Arthropoda	Insecta	Diptera	Cecidomyiidae
ESV_427367	BOLD	98.1	PLRAY233-20	Animalia	Arthropoda	Insecta	Diptera	Cecidomyiidae
ESV_427367	BOLD	98.1	PLRBC122-20	Animalia	Arthropoda	Insecta	Diptera	Cecidomyiidae
ESV_427367	BOLD	98.1	PLTAZ728-20	Animalia	Arthropoda	Insecta	Diptera	Cecidomyiidae
ESV_427367	BOLD	97.8	CROAC10153-21	Animalia	Arthropoda	Insecta	Diptera	Cecidomyiidae
ESV_427367	BOLD	97.8	PLJBA417-20	Animalia	Arthropoda	Insecta	Diptera	Cecidomyiidae
ESV_427367	BOLD	97.8	PLLBC262-20	Animalia	Arthropoda	Insecta	Diptera	Cecidomyiidae
ESV_427367	BOLD	97.8	PLMBD238-20	Animalia	Arthropoda	Insecta	Diptera	Cecidomyiidae
ESV_427367	BOLD	97.8	PLOAZ071-20	Animalia	Arthropoda	Insecta	Diptera	Cecidomyiidae
ESV_427367	BOLD	97.8	CROAB49917-21	Animalia	Arthropoda	Insecta	Diptera	Cecidomyiidae
ESV_427367	BOLD	97.8	CROAC12496-21	Animalia	Arthropoda	Insecta	Diptera	Cecidomyiidae
ESV_427393	BOLD	95.2	CRBTA29815-24	Animalia	Arthropoda	Insecta	Diptera	Cecidomyiidae
ESV_427393	BOLD	95.2	CRCCD9759-23	Animalia	Arthropoda	Insecta	Diptera	Cecidomyiidae
ESV_427393	BOLD	94.9	CRBOF25659-24	Animalia	Arthropoda	Insecta	Diptera	Cecidomyiidae
ESV_427393	BOLD	94.9	CRBOF38807-24	Animalia	Arthropoda	Insecta	Diptera	Cecidomyiidae
ESV_427393	BOLD	94.9	CRCCD1049-23	Animalia	Arthropoda	Insecta	Diptera	Cecidomyiidae
ESV_427393	BOLD	94.9	CRCCD2349-23	Animalia	Arthropoda	Insecta	Diptera	Cecidomyiidae
ESV_427393	BOLD	94.9	CRCCD2601-23	Animalia	Arthropoda	Insecta	Diptera	Cecidomyiidae
ESV_427393	BOLD	94.9	CRCCD2680-23	Animalia	Arthropoda	Insecta	Diptera	Cecidomyiidae
ESV_427393	BOLD	94.9	CRCCD2526-23	Animalia	Arthropoda	Insecta	Diptera	Cecidomyiidae
ESV_427393	BOLD	94.9	CRCCD2535-23	Animalia	Arthropoda	Insecta	Diptera	Cecidomyiidae
ESV_427393	BOLD	94.9	CRCCD2759-23	Animalia	Arthropoda	Insecta	Diptera	Cecidomyiidae
ESV_427393	BOLD	94.9	CRCCD2993-23	Animalia	Arthropoda	Insecta	Diptera	Cecidomyiidae
ESV_427393	BOLD	94.9	CRCCD3265-23	Animalia	Arthropoda	Insecta	Diptera	Cecidomyiidae
ESV_427393	BOLD	94.9	CRCCD3280-23	Animalia	Arthropoda	Insecta	Diptera	Cecidomyiidae
ESV_427393	BOLD	94.9	CRCCD3285-23	Animalia	Arthropoda	Insecta	Diptera	Cecidomyiidae
ESV_427393	BOLD	94.9	CRCCD3153-23	Animalia	Arthropoda	Insecta	Diptera	Cecidomyiidae
ESV_427393	BOLD	94.9	CRCCD3383-23	Animalia	Arthropoda	Insecta	Diptera	Cecidomyiidae
ESV_427393	BOLD	94.9	CRCCD3314-23	Animalia	Arthropoda	Insecta	Diptera	Cecidomyiidae
ESV_427393	BOLD	94.9	CRCCD3397-23	Animalia	Arthropoda	Insecta	Diptera	Cecidomyiidae
ESV_427393	BOLD	94.9	CRCCD3633-23	Animalia	Arthropoda	Insecta	Diptera	Cecidomyiidae
ESV_427393	BOLD	94.9	CRCCD3580-23	Animalia	Arthropoda	Insecta	Diptera	Cecidomyiidae
ESV_427393	BOLD	94.9	CRCCD3761-23	Animalia	Arthropoda	Insecta	Diptera	Cecidomyiidae
ESV_427393	BOLD	94.9	CRCCD3784-23	Animalia	Arthropoda	Insecta	Diptera	Cecidomyiidae
ESV_427393	BOLD	94.9	CRCCD3803-23	Animalia	Arthropoda	Insecta	Diptera	Cecidomyiidae
ESV_427393	BOLD	94.9	CRCCD4020-23	Animalia	Arthropoda	Insecta	Diptera	Cecidomyiidae
ESV_427393	BOLD	94.9	CRCCD4699-23	Animalia	Arthropoda	Insecta	Diptera	Cecidomyiidae
ESV_427393	BOLD	94.9	CRCCD6244-23	Animalia	Arthropoda	Insecta	Diptera	Cecidomyiidae
ESV_427393	BOLD	94.9	CRCCD6362-23	Animalia	Arthropoda	Insecta	Diptera	Cecidomyiidae
ESV_427393	BOLD	94.9	CRCCD6328-23	Animalia	Arthropoda	Insecta	Diptera	Cecidomyiidae
ESV_427393	BOLD	94.9	CRCCD7646-23	Animalia	Arthropoda	Insecta	Diptera	Cecidomyiidae
ESV_427393	BOLD	94.9	CRCCD7667-23	Animalia	Arthropoda	Insecta	Diptera	Cecidomyiidae
ESV_427393	BOLD	94.9	CRCCD8684-23	Animalia	Arthropoda	Insecta	Diptera	Cecidomyiidae
ESV_427393	BOLD	94.9	CRCCD8723-23	Animalia	Arthropoda	Insecta	Diptera	Cecidomyiidae
ESV_427393	BOLD	94.9	CRCCD9673-23	Animalia	Arthropoda	Insecta	Diptera	Cecidomyiidae
ESV_427393	BOLD	94.9	CRCCD9743-23	Animalia	Arthropoda	Insecta	Diptera	Cecidomyiidae
ESV_427393	BOLD	94.9	CRCCD9778-23	Animalia	Arthropoda	Insecta	Diptera	Cecidomyiidae
ESV_427393	BOLD	94.9	CRCCD9808-23	Animalia	Arthropoda	Insecta	Diptera	Cecidomyiidae
ESV_427393	BOLD	94.9	CRKAT382-23	Animalia	Arthropoda	Insecta	Diptera	Cecidomyiidae
ESV_427393	BOLD	94.9	CRLSB16806-24	Animalia	Arthropoda	Insecta	Diptera	Cecidomyiidae
ESV_427393	BOLD	94.9	CRMLE2758-24	Animalia	Arthropoda	Insecta	Diptera	Cecidomyiidae
ESV_427393	BOLD	94.9	CRMLG5875-24	Animalia	Arthropoda	Insecta	Diptera	Cecidomyiidae
ESV_427393	BOLD	94.9	CRMNE10091-24	Animalia	Arthropoda	Insecta	Diptera	Cecidomyiidae
ESV_427393	BOLD	94.9	CRSRC12773-24	Animalia	Arthropoda	Insecta	Diptera	Cecidomyiidae
ESV_427393	BOLD	94.9	GMCRU446-13	Animalia	Arthropoda	Insecta	Diptera	Cecidomyiidae
ESV_427393	BOLD	94.9	GMCRW956-13	Animalia	Arthropoda	Insecta	Diptera	Cecidomyiidae
ESV_427393	BOLD	94.9	ONTA22124-23	Animalia	Arthropoda	Insecta	Diptera	Cecidomyiidae
ESV_427393	BOLD	94.6	PLLAZ1469-20	Animalia	Arthropoda	Insecta	Diptera	Cecidomyiidae
ESV_427393	BOLD	94.6	CRCCD8197-23	Animalia	Arthropoda	Insecta	Diptera	Cecidomyiidae
ESV_427393	BOLD	94.6	PLPCE2956-20	Animalia	Arthropoda	Insecta	Diptera	Cecidomyiidae
ESV_427393	BOLD	94.6	PLRBG456-20	Animalia	Arthropoda	Insecta	Diptera	Cecidomyiidae
ESV_427393	BOLD	94.6	PLXBZ259-20	Animalia	Arthropoda	Insecta	Diptera	Cecidomyiidae
ESV_427393	BOLD	94.6	CRCCD2660-23	Animalia	Arthropoda	Insecta	Diptera	Cecidomyiidae
ESV_427393	BOLD	94.6	CRCCD9677-23	Animalia	Arthropoda	Insecta	Diptera	Cecidomyiidae
ESV_427393	BOLD	94.6	CRCED20317-23	Animalia	Arthropoda	Insecta	Diptera	Cecidomyiidae
ESV_427393	BOLD	94.6	CRLSB17217-24	Animalia	Arthropoda	Insecta	Diptera	Cecidomyiidae
ESV_427393	BOLD	94.6	GMCRU431-13	Animalia	Arthropoda	Insecta	Diptera	Cecidomyiidae
ESV_427393	BOLD	94.2	PLABI2073-19	Animalia	Arthropoda	Insecta	Diptera	Cecidomyiidae
ESV_427393	BOLD	94.2	PLTCL033-20	Animalia	Arthropoda	Insecta	Diptera	Cecidomyiidae
ESV_427393	BOLD	94.2	CRBOF8469-23	Animalia	Arthropoda	Insecta	Diptera	Cecidomyiidae
ESV_427393	BOLD	94.2	CRTOD2973-23	Animalia	Arthropoda	Insecta	Diptera	Cecidomyiidae
ESV_427396	BOLD	99.7	GMPAZ401-18	Animalia	Arthropoda	Insecta	Diptera	Cecidomyiidae
ESV_427408	BOLD	99.4	GMPAX001-18	Animalia	Arthropoda	Malacostraca	Isopoda
ESV_427504	BOLD	99.7	CRBOF44991-24	Animalia	Arthropoda	Insecta	Diptera	Cecidomyiidae
ESV_427504	BOLD	99	CRPTD2556-25	Animalia	Arthropoda	Insecta	Diptera	Cecidomyiidae
ESV_427504	BOLD	98.7	CRMND2510-24	Animalia	Arthropoda	Insecta	Diptera	Cecidomyiidae
ESV_427510	BOLD	100	CRSRD21957-24	Animalia	Arthropoda	Insecta	Diptera	Cecidomyiidae
ESV_427510	BOLD	100	CRSRD22099-24	Animalia	Arthropoda	Insecta	Diptera	Cecidomyiidae
ESV_427510	BOLD	100	CRSRD7606-23	Animalia	Arthropoda	Insecta	Diptera	Cecidomyiidae
ESV_427510	BOLD	100	CRSRD9489-23	Animalia	Arthropoda	Insecta	Diptera	Cecidomyiidae
ESV_427510	BOLD	100	CRTOD15102-23	Animalia	Arthropoda	Insecta	Diptera	Cecidomyiidae
ESV_427510	BOLD	100	ONTA41538-23	Animalia	Arthropoda	Insecta	Diptera	Cecidomyiidae
ESV_427529	BOLD	100	CRBOF22391-24	Animalia	Arthropoda	Insecta	Diptera	Cecidomyiidae
ESV_427529	BOLD	100	CRBOF19137-24	Animalia	Arthropoda	Insecta	Diptera	Cecidomyiidae
ESV_427529	BOLD	100	CRBOF28531-24	Animalia	Arthropoda	Insecta	Diptera	Cecidomyiidae
ESV_427529	BOLD	100	CRBOH15058-24	Animalia	Arthropoda	Insecta	Diptera	Cecidomyiidae
ESV_427529	BOLD	100	CRSRD9204-23	Animalia	Arthropoda	Insecta	Diptera	Cecidomyiidae
ESV_427529	BOLD	100	GMPAN1130-18	Animalia	Arthropoda	Insecta	Diptera	Cecidomyiidae
ESV_427529	BOLD	100	PLABD3559-19	Animalia	Arthropoda	Insecta	Diptera	Cecidomyiidae
ESV_427529	BOLD	100	PLNDE927-20	Animalia	Arthropoda	Insecta	Diptera	Cecidomyiidae
ESV_427531	BOLD	98.1	CRHYA7969-22	Animalia	Arthropoda	Insecta	Diptera	Cecidomyiidae
ESV_427531	BOLD	97.4	CRSIC9554-23	Animalia	Arthropoda	Insecta	Diptera	Cecidomyiidae
ESV_427531	BOLD	97.4	CRSIC9663-23	Animalia	Arthropoda	Insecta	Diptera	Cecidomyiidae
ESV_427531	BOLD	97.1	CROAD12717-22	Animalia	Arthropoda	Insecta	Diptera	Cecidomyiidae
ESV_427550	BOLD	100	GMPAN731-18	Animalia	Arthropoda	Insecta	Diptera	Cecidomyiidae
ESV_427552	BOLD	95.8	CRALD7216-23	Animalia	Arthropoda	Insecta	Diptera	Cecidomyiidae
ESV_427552	BOLD	95.2	CRALB21533-21	Animalia	Arthropoda	Insecta	Diptera	Cecidomyiidae
ESV_427552	BOLD	94.9	CRALB41321-21	Animalia	Arthropoda	Insecta	Diptera	Cecidomyiidae
ESV_427555	BOLD	99.7	CRSIC576-23	Animalia	Arthropoda	Insecta	Diptera	Cecidomyiidae
ESV_427555	BOLD	99.7	CRSIC2340-23	Animalia	Arthropoda	Insecta	Diptera	Cecidomyiidae
ESV_427555	BOLD	99.7	CRSIC5155-23	Animalia	Arthropoda	Insecta	Diptera	Cecidomyiidae
ESV_427555	BOLD	99.7	CRSIC6114-23	Animalia	Arthropoda	Insecta	Diptera	Cecidomyiidae
ESV_427555	BOLD	99.7	CRSRA16234-22	Animalia	Arthropoda	Insecta	Diptera	Cecidomyiidae
ESV_427555	BOLD	99.7	CRSRA19702-22	Animalia	Arthropoda	Insecta	Diptera	Cecidomyiidae
ESV_427555	BOLD	99.7	CRSRD14152-24	Animalia	Arthropoda	Insecta	Diptera	Cecidomyiidae
ESV_427555	BOLD	99.7	CRSRD8852-23	Animalia	Arthropoda	Insecta	Diptera	Cecidomyiidae
ESV_427555	BOLD	99.7	ONTB8870-23	Animalia	Arthropoda	Insecta	Diptera	Cecidomyiidae
ESV_427555	BOLD	99.4	CRHYA43478-22	Animalia	Arthropoda	Insecta	Diptera	Cecidomyiidae
ESV_427555	BOLD	99.4	CROAB7325-21	Animalia	Arthropoda	Insecta	Diptera	Cecidomyiidae
ESV_427555	BOLD	99.4	CROCA2294-21	Animalia	Arthropoda	Insecta	Diptera	Cecidomyiidae
ESV_427555	BOLD	99.4	CRSIB6302-22	Animalia	Arthropoda	Insecta	Diptera	Cecidomyiidae
ESV_427555	BOLD	99.4	CRSRA23899-22	Animalia	Arthropoda	Insecta	Diptera	Cecidomyiidae
ESV_427555	BOLD	99.4	CRBOF22868-24	Animalia	Arthropoda	Insecta	Diptera	Cecidomyiidae
ESV_427555	BOLD	99.4	CRBOF34502-24	Animalia	Arthropoda	Insecta	Diptera	Cecidomyiidae
ESV_427555	BOLD	99.4	CRBOG6890-23	Animalia	Arthropoda	Insecta	Diptera	Cecidomyiidae
ESV_427555	BOLD	99.4	CRBOH687-24	Animalia	Arthropoda	Insecta	Diptera	Cecidomyiidae
ESV_427555	BOLD	99.4	CRBOH731-24	Animalia	Arthropoda	Insecta	Diptera	Cecidomyiidae
ESV_427555	BOLD	99.4	CRBOH6219-24	Animalia	Arthropoda	Insecta	Diptera	Cecidomyiidae
ESV_427555	BOLD	99.4	CRCBD24910-23	Animalia	Arthropoda	Insecta	Diptera	Cecidomyiidae
ESV_427555	BOLD	99.4	CRSGD13102-24	Animalia	Arthropoda	Insecta	Diptera	Cecidomyiidae
ESV_427555	BOLD	99.4	CRSGD16677-24	Animalia	Arthropoda	Insecta	Diptera	Cecidomyiidae
ESV_427555	BOLD	99.4	CRSGD845-24	Animalia	Arthropoda	Insecta	Diptera	Cecidomyiidae
ESV_427555	BOLD	99.4	CRTOD19170-23	Animalia	Arthropoda	Insecta	Diptera	Cecidomyiidae
ESV_427555	BOLD	99.4	ONTA16701-23	Animalia	Arthropoda	Insecta	Diptera	Cecidomyiidae
ESV_427555	BOLD	99.4	ONTB47463-23	Animalia	Arthropoda	Insecta	Diptera	Cecidomyiidae
ESV_427555	BOLD	99	CRBAC622-22	Animalia	Arthropoda	Insecta	Diptera	Cecidomyiidae
ESV_427555	BOLD	99	CRHYA28890-22	Animalia	Arthropoda	Insecta	Diptera	Cecidomyiidae
ESV_427555	BOLD	99	CRHYA38440-22	Animalia	Arthropoda	Insecta	Diptera	Cecidomyiidae
ESV_427555	BOLD	99	CRHYB5619-22	Animalia	Arthropoda	Insecta	Diptera	Cecidomyiidae
ESV_427555	BOLD	99	CROAB45827-21	Animalia	Arthropoda	Insecta	Diptera	Cecidomyiidae
ESV_427555	BOLD	99	CROAE369-22	Animalia	Arthropoda	Insecta	Diptera	Cecidomyiidae
ESV_427555	BOLD	99	CROAE416-22	Animalia	Arthropoda	Insecta	Diptera	Cecidomyiidae
ESV_427555	BOLD	99	CROCA10695-21	Animalia	Arthropoda	Insecta	Diptera	Cecidomyiidae
ESV_427555	BOLD	99	CROCA8972-21	Animalia	Arthropoda	Insecta	Diptera	Cecidomyiidae
ESV_427555	BOLD	99	CRSIA20867-22	Animalia	Arthropoda	Insecta	Diptera	Cecidomyiidae
ESV_427555	BOLD	99	CRSIA9616-21	Animalia	Arthropoda	Insecta	Diptera	Cecidomyiidae
ESV_427555	BOLD	99	CRSRA1082-22	Animalia	Arthropoda	Insecta	Diptera	Cecidomyiidae
ESV_427555	BOLD	99	CRSRA14012-22	Animalia	Arthropoda	Insecta	Diptera	Cecidomyiidae
ESV_427555	BOLD	99	CRBOA16092-23	Animalia	Arthropoda	Insecta	Diptera	Cecidomyiidae
ESV_427555	BOLD	99	CRBOA50231-23	Animalia	Arthropoda	Insecta	Diptera	Cecidomyiidae
ESV_427555	BOLD	99	CRBOB5840-23	Animalia	Arthropoda	Insecta	Diptera	Cecidomyiidae
ESV_427555	BOLD	99	CRCEC40368-22	Animalia	Arthropoda	Insecta	Diptera	Cecidomyiidae
ESV_427555	BOLD	99	CRTOA32288-21	Animalia	Arthropoda	Insecta	Diptera	Cecidomyiidae
ESV_427555	BOLD	99	CRTOA28100-21	Animalia	Arthropoda	Insecta	Diptera	Cecidomyiidae
ESV_427555	BOLD	99	CRTOA42689-22	Animalia	Arthropoda	Insecta	Diptera	Cecidomyiidae
ESV_427555	BOLD	98.7	CRSIA2310-21	Animalia	Arthropoda	Insecta	Diptera	Cecidomyiidae
ESV_427555	BOLD	98.7	CRSIA27758-22	Animalia	Arthropoda	Insecta	Diptera	Cecidomyiidae
ESV_427555	BOLD	98.7	CRSIA3922-21	Animalia	Arthropoda	Insecta	Diptera	Cecidomyiidae
ESV_427555	BOLD	98.7	CRSIA4507-21	Animalia	Arthropoda	Insecta	Diptera	Cecidomyiidae
ESV_427555	BOLD	98.7	CRSIA4643-21	Animalia	Arthropoda	Insecta	Diptera	Cecidomyiidae
ESV_427555	BOLD	98.7	CRSRA40838-22	Animalia	Arthropoda	Insecta	Diptera	Cecidomyiidae
ESV_427555	BOLD	98.7	CRBOA34080-23	Animalia	Arthropoda	Insecta	Diptera	Cecidomyiidae
ESV_427555	BOLD	98.7	CRCBA22613-22	Animalia	Arthropoda	Insecta	Diptera	Cecidomyiidae
ESV_427555	BOLD	98.7	CRCBB38025-23	Animalia	Arthropoda	Insecta	Diptera	Cecidomyiidae
ESV_427555	BOLD	98.7	CRCEA2702-21	Animalia	Arthropoda	Insecta	Diptera	Cecidomyiidae
ESV_427555	BOLD	98.7	CRCEB14689-22	Animalia	Arthropoda	Insecta	Diptera	Cecidomyiidae
ESV_427555	BOLD	98.7	CROAE2906-22	Animalia	Arthropoda	Insecta	Diptera	Cecidomyiidae
ESV_427555	BOLD	98.7	CRTOA12008-21	Animalia	Arthropoda	Insecta	Diptera	Cecidomyiidae
ESV_427555	BOLD	98.7	CRTOA21756-21	Animalia	Arthropoda	Insecta	Diptera	Cecidomyiidae
ESV_427555	BOLD	98.7	CRTOA42450-22	Animalia	Arthropoda	Insecta	Diptera	Cecidomyiidae
ESV_427555	BOLD	98.7	CRTOB10968-22	Animalia	Arthropoda	Insecta	Diptera	Cecidomyiidae
ESV_427555	BOLD	98.7	CRTOB11223-22	Animalia	Arthropoda	Insecta	Diptera	Cecidomyiidae
ESV_427555	BOLD	98.7	CRTOB7062-22	Animalia	Arthropoda	Insecta	Diptera	Cecidomyiidae
ESV_427555	BOLD	98.7	CRTRA24491-22	Animalia	Arthropoda	Insecta	Diptera	Cecidomyiidae
ESV_427555	BOLD	98.7	CRTRA33247-22	Animalia	Arthropoda	Insecta	Diptera	Cecidomyiidae
ESV_427555	BOLD	98.7	CRTRB14413-22	Animalia	Arthropoda	Insecta	Diptera	Cecidomyiidae
ESV_427555	BOLD	98.7	CRTRB7591-22	Animalia	Arthropoda	Insecta	Diptera	Cecidomyiidae
ESV_427555	BOLD	98.7	CRCBB38727-23	Animalia	Arthropoda	Insecta	Coleoptera
ESV_427557	BOLD	95.5	CRBOE26433-23	Animalia	Arthropoda	Insecta	Diptera	Cecidomyiidae
ESV_427557	BOLD	95.5	CRBOF35524-24	Animalia	Arthropoda	Insecta	Diptera	Cecidomyiidae
ESV_427557	BOLD	95.5	CRBOF8389-23	Animalia	Arthropoda	Insecta	Diptera	Cecidomyiidae
ESV_427557	BOLD	95.5	CRBOH24736-24	Animalia	Arthropoda	Insecta	Diptera	Cecidomyiidae
ESV_427557	BOLD	95.5	CRBOI18237-24	Animalia	Arthropoda	Insecta	Diptera	Cecidomyiidae
ESV_427557	BOLD	95.5	CRLSB21013-24	Animalia	Arthropoda	Insecta	Diptera	Cecidomyiidae
ESV_427557	BOLD	95.5	ONTB50104-23	Animalia	Arthropoda	Insecta	Diptera	Cecidomyiidae
ESV_427557	BOLD	95.5	PLABF3967-19	Animalia	Arthropoda	Insecta	Diptera	Cecidomyiidae
ESV_427557	BOLD	95.2	CRBAC14447-22	Animalia	Arthropoda	Insecta	Diptera	Cecidomyiidae
ESV_427557	BOLD	95.2	GMCNA32603-21	Animalia	Arthropoda	Insecta	Diptera	Cecidomyiidae
ESV_427557	BOLD	95.2	GMCNB3924-21	Animalia	Arthropoda	Insecta	Diptera	Cecidomyiidae
ESV_427557	BOLD	94.9	CRBLB2888-22	Animalia	Arthropoda	Insecta	Diptera	Cecidomyiidae
ESV_427557	BOLD	94.9	CRBLC44995-22	Animalia	Arthropoda	Insecta	Diptera	Cecidomyiidae
ESV_427557	BOLD	94.9	CRBOA45441-23	Animalia	Arthropoda	Insecta	Diptera	Cecidomyiidae
ESV_427557	BOLD	94.9	CRBOA45951-23	Animalia	Arthropoda	Insecta	Diptera	Cecidomyiidae
ESV_427557	BOLD	94.9	CRBOA48862-23	Animalia	Arthropoda	Insecta	Diptera	Cecidomyiidae
ESV_427557	BOLD	94.9	GMCNA8419-21	Animalia	Arthropoda	Insecta	Diptera	Cecidomyiidae
ESV_427557	BOLD	94.9	CRBOA41305-23	Animalia	Arthropoda	Insecta	Diptera	Cecidomyiidae
ESV_427557	BOLD	94.9	CRBOG2316-23	Animalia	Arthropoda	Insecta	Diptera	Cecidomyiidae
ESV_427557	BOLD	94.9	CRBOG5696-23	Animalia	Arthropoda	Insecta	Diptera	Cecidomyiidae
ESV_427557	BOLD	94.9	CRBOG7598-23	Animalia	Arthropoda	Insecta	Diptera	Cecidomyiidae
ESV_427557	BOLD	94.9	CRBOH10243-24	Animalia	Arthropoda	Insecta	Diptera	Cecidomyiidae
ESV_427557	BOLD	94.9	CRCCF5252-23	Animalia	Arthropoda	Insecta	Diptera	Cecidomyiidae
ESV_427557	BOLD	94.9	CRCCI3328-24	Animalia	Arthropoda	Insecta	Diptera	Cecidomyiidae
ESV_427557	BOLD	94.9	GMHGL370-13	Animalia	Arthropoda	Insecta	Diptera	Cecidomyiidae
ESV_427557	BOLD	94.9	ONTB45583-23	Animalia	Arthropoda	Insecta	Diptera	Cecidomyiidae
ESV_427557	BOLD	94.6	CRBAC10321-22	Animalia	Arthropoda	Insecta	Diptera	Cecidomyiidae
ESV_427557	BOLD	94.6	CRBAC12229-22	Animalia	Arthropoda	Insecta	Diptera	Cecidomyiidae
ESV_427557	BOLD	94.6	CRBLA44435-22	Animalia	Arthropoda	Insecta	Diptera	Cecidomyiidae
ESV_427557	BOLD	94.6	CRBLA46325-22	Animalia	Arthropoda	Insecta	Diptera	Cecidomyiidae
ESV_427557	BOLD	94.6	CRBOA19392-23	Animalia	Arthropoda	Insecta	Diptera	Cecidomyiidae
ESV_427557	BOLD	94.6	CRHYB1437-22	Animalia	Arthropoda	Insecta	Diptera	Cecidomyiidae
ESV_427557	BOLD	94.6	CRBOA20993-23	Animalia	Arthropoda	Insecta	Diptera	Cecidomyiidae
ESV_427557	BOLD	94.6	GMCNA36570-21	Animalia	Arthropoda	Insecta	Diptera	Cecidomyiidae
ESV_427557	BOLD	94.6	PLECZ3165-20	Animalia	Arthropoda	Insecta	Diptera	Cecidomyiidae
ESV_427557	BOLD	94.6	CRLDA25384-24	Animalia	Arthropoda	Insecta	Diptera	Cecidomyiidae
ESV_427557	BOLD	94.6	CRLDD29595-24	Animalia	Arthropoda	Insecta	Diptera	Cecidomyiidae
ESV_427557	BOLD	94.6	CRLDD34892-24	Animalia	Arthropoda	Insecta	Diptera	Cecidomyiidae
ESV_427557	BOLD	94.6	CRSGC32135-23	Animalia	Arthropoda	Insecta	Diptera	Cecidomyiidae
ESV_427557	BOLD	94.6	CRSGC34805-23	Animalia	Arthropoda	Insecta	Diptera	Cecidomyiidae
ESV_427557	BOLD	94.6	GMHGR021-13	Animalia	Arthropoda	Insecta	Diptera	Cecidomyiidae
ESV_427561	BOLD	93.6	CRCBD7294-23	Animalia	Arthropoda	Insecta	Diptera	Cecidomyiidae
ESV_427561	BOLD	93.3	CRCEB29892-22	Animalia	Arthropoda	Insecta	Diptera	Cecidomyiidae
ESV_427561	BOLD	93.3	CRMLB1872-24	Animalia	Arthropoda	Insecta	Diptera	Cecidomyiidae
ESV_427561	BOLD	93.3	GMCRP208-13	Animalia	Arthropoda	Insecta	Diptera	Cecidomyiidae
ESV_427561	BOLD	93	CRCBB3328-23	Animalia	Arthropoda	Insecta	Diptera	Cecidomyiidae
ESV_427561	BOLD	93	CRHYA14150-22	Animalia	Arthropoda	Insecta	Diptera	Cecidomyiidae
ESV_427561	BOLD	93	GMPAM551-18	Animalia	Arthropoda	Insecta	Diptera	Cecidomyiidae
ESV_427561	BOLD	93	CRMLA7885-24	Animalia	Arthropoda	Insecta	Diptera	Cecidomyiidae
ESV_427561	BOLD	93	CRMNA3682-24	Animalia	Arthropoda	Insecta	Diptera	Cecidomyiidae
ESV_427561	BOLD	93	CRSRD16156-24	Animalia	Arthropoda	Insecta	Diptera	Cecidomyiidae
ESV_427561	BOLD	93	GMCRR280-13	Animalia	Arthropoda	Insecta	Diptera	Cecidomyiidae
ESV_427561	BOLD	92.7	PLTDG030-20	Animalia	Arthropoda	Insecta	Diptera	Cecidomyiidae
ESV_427561	BOLD	92.7	CRHYA43543-22	Animalia	Arthropoda	Insecta	Diptera	Cecidomyiidae
ESV_427561	BOLD	92.7	CRTOA47210-22	Animalia	Arthropoda	Insecta	Diptera	Cecidomyiidae
ESV_427561	BOLD	92.7	CRCBC44983-23	Animalia	Arthropoda	Insecta	Diptera	Cecidomyiidae
ESV_427561	BOLD	92.7	CRCBC52975-23	Animalia	Arthropoda	Insecta	Diptera	Cecidomyiidae
ESV_427561	BOLD	92.7	CRLSB29648-24	Animalia	Arthropoda	Insecta	Diptera	Cecidomyiidae
ESV_427561	BOLD	92.7	CRLSB509-24	Animalia	Arthropoda	Insecta	Diptera	Cecidomyiidae
ESV_427561	BOLD	92.7	CRMNE5710-24	Animalia	Arthropoda	Insecta	Diptera	Cecidomyiidae
ESV_427561	BOLD	92.7	CRMNE4268-24	Animalia	Arthropoda	Insecta	Diptera	Cecidomyiidae
ESV_427561	BOLD	92.7	CRMNF6280-24	Animalia	Arthropoda	Insecta	Diptera	Cecidomyiidae
ESV_427561	BOLD	92.7	CROAD6492-22	Animalia	Arthropoda	Insecta	Diptera	Cecidomyiidae
ESV_427561	BOLD	92.7	CROAE4810-23	Animalia	Arthropoda	Insecta	Diptera	Cecidomyiidae
ESV_427561	BOLD	92.7	CROCA8083-21	Animalia	Arthropoda	Insecta	Diptera	Cecidomyiidae
ESV_427561	BOLD	92.7	CROZA16135-21	Animalia	Arthropoda	Insecta	Diptera	Cecidomyiidae
ESV_427561	BOLD	92.7	CRSIA40498-22	Animalia	Arthropoda	Insecta	Diptera	Cecidomyiidae
ESV_427561	BOLD	92.7	CRSIC3679-23	Animalia	Arthropoda	Insecta	Diptera	Cecidomyiidae
ESV_427561	BOLD	92.7	CRSIC9369-23	Animalia	Arthropoda	Insecta	Diptera	Cecidomyiidae
ESV_427561	BOLD	92.7	CRSIC9454-23	Animalia	Arthropoda	Insecta	Diptera	Cecidomyiidae
ESV_427561	BOLD	92.7	CRSRD10358-23	Animalia	Arthropoda	Insecta	Diptera	Cecidomyiidae
ESV_427561	BOLD	92.7	CRSRD11220-23	Animalia	Arthropoda	Insecta	Diptera	Cecidomyiidae
ESV_427561	BOLD	92.7	CRSRD11168-23	Animalia	Arthropoda	Insecta	Diptera	Cecidomyiidae
ESV_427561	BOLD	92.7	CRSRD11271-23	Animalia	Arthropoda	Insecta	Diptera	Cecidomyiidae
ESV_427561	BOLD	92.7	CRSRD11541-23	Animalia	Arthropoda	Insecta	Diptera	Cecidomyiidae
ESV_427561	BOLD	92.7	CRSRD16046-24	Animalia	Arthropoda	Insecta	Diptera	Cecidomyiidae
ESV_427561	BOLD	92.7	CRSRD16834-24	Animalia	Arthropoda	Insecta	Diptera	Cecidomyiidae
ESV_427561	BOLD	92.7	CRSRD16821-24	Animalia	Arthropoda	Insecta	Diptera	Cecidomyiidae
ESV_427561	BOLD	92.7	CRSRD16899-24	Animalia	Arthropoda	Insecta	Diptera	Cecidomyiidae
ESV_427561	BOLD	92.7	CRSRD17099-24	Animalia	Arthropoda	Insecta	Diptera	Cecidomyiidae
ESV_427561	BOLD	92.7	CRSRD18184-24	Animalia	Arthropoda	Insecta	Diptera	Cecidomyiidae
ESV_427561	BOLD	92.7	CRSRD18249-24	Animalia	Arthropoda	Insecta	Diptera	Cecidomyiidae
ESV_427561	BOLD	92.7	CRSRD18661-24	Animalia	Arthropoda	Insecta	Diptera	Cecidomyiidae
ESV_427561	BOLD	92.7	CRSRD19372-24	Animalia	Arthropoda	Insecta	Diptera	Cecidomyiidae
ESV_427561	BOLD	92.7	CRSRD20184-24	Animalia	Arthropoda	Insecta	Diptera	Cecidomyiidae
ESV_427561	BOLD	92.7	CRSRD22102-24	Animalia	Arthropoda	Insecta	Diptera	Cecidomyiidae
ESV_427561	BOLD	92.7	CRSRD2381-23	Animalia	Arthropoda	Insecta	Diptera	Cecidomyiidae
ESV_427561	BOLD	92.7	CRSRD2570-23	Animalia	Arthropoda	Insecta	Diptera	Cecidomyiidae
ESV_427561	BOLD	92.7	CRSRD2580-23	Animalia	Arthropoda	Insecta	Diptera	Cecidomyiidae
ESV_427561	BOLD	92.7	CRSRD2768-23	Animalia	Arthropoda	Insecta	Diptera	Cecidomyiidae
ESV_427561	BOLD	92.7	CRSRD2947-23	Animalia	Arthropoda	Insecta	Diptera	Cecidomyiidae
ESV_427561	BOLD	92.7	CRSRD3996-23	Animalia	Arthropoda	Insecta	Diptera	Cecidomyiidae
ESV_427561	BOLD	92.7	CRSRD4372-23	Animalia	Arthropoda	Insecta	Diptera	Cecidomyiidae
ESV_427561	BOLD	92.7	CRSRD4375-23	Animalia	Arthropoda	Insecta	Diptera	Cecidomyiidae
ESV_427561	BOLD	92.7	CRTOA29517-21	Animalia	Arthropoda	Insecta	Diptera	Cecidomyiidae
ESV_427561	BOLD	92.7	CRTOB6143-22	Animalia	Arthropoda	Insecta	Diptera	Cecidomyiidae
ESV_427561	BOLD	92.7	CRTOD11045-23	Animalia	Arthropoda	Insecta	Diptera	Cecidomyiidae
ESV_427561	BOLD	92.7	CRTOD2962-23	Animalia	Arthropoda	Insecta	Diptera	Cecidomyiidae
ESV_427561	BOLD	92.7	CRTOD3475-23	Animalia	Arthropoda	Insecta	Diptera	Cecidomyiidae
ESV_427561	BOLD	92.7	EMCEB5608-22	Animalia	Arthropoda	Insecta	Diptera	Cecidomyiidae
ESV_427561	BOLD	92.7	GMCRM2350-13	Animalia	Arthropoda	Insecta	Diptera	Cecidomyiidae
ESV_427561	BOLD	92.7	GMCRX1534-14	Animalia	Arthropoda	Insecta	Diptera	Cecidomyiidae
ESV_427561	BOLD	92.7	GMSPA37223-22	Animalia	Arthropoda	Insecta	Diptera	Cecidomyiidae
ESV_427561	BOLD	92.7	ONTB8935-23	Animalia	Arthropoda	Insecta	Diptera	Cecidomyiidae
ESV_427562	BOLD	99.7	GMPAC1243-18	Animalia	Arthropoda	Insecta	Diptera	Cecidomyiidae
ESV_427562	BOLD	99.7	GMPAF424-18	Animalia	Arthropoda	Insecta	Diptera	Cecidomyiidae
ESV_427562	BOLD	99.7	GMPAI341-18	Animalia	Arthropoda	Insecta	Diptera	Cecidomyiidae
ESV_427562	BOLD	99.7	GMPAK369-18	Animalia	Arthropoda	Insecta	Diptera	Cecidomyiidae
ESV_427562	BOLD	99.4	GMPAF476-18	Animalia	Arthropoda	Insecta	Diptera	Cecidomyiidae
ESV_427562	BOLD	99.4	GMPAG305-18	Animalia	Arthropoda	Insecta	Diptera	Cecidomyiidae
ESV_427562	BOLD	99.4	GMPAG330-18	Animalia	Arthropoda	Insecta	Diptera	Cecidomyiidae
ESV_427562	BOLD	99.4	GMPAN1004-18	Animalia	Arthropoda	Insecta	Diptera	Cecidomyiidae
ESV_427562	BOLD	99.4	GMPAK424-18	Animalia	Arthropoda	Insecta	Diptera	Cecidomyiidae
ESV_427562	BOLD	99	GMPAL461-18	Animalia	Arthropoda	Insecta	Diptera	Cecidomyiidae
ESV_427562	BOLD	99	GMPAL388-18	Animalia	Arthropoda	Insecta	Diptera	Cecidomyiidae
ESV_427562	BOLD	99	GMPAM627-18	Animalia	Arthropoda	Insecta	Diptera	Cecidomyiidae
ESV_427562	BOLD	99	GMPPA364-18	Animalia	Arthropoda	Insecta	Diptera	Cecidomyiidae
ESV_427590	BOLD	93	SICOB789-18	Animalia	Arthropoda	Insecta	Hymenoptera	Colletidae	Lonchopria	Lonchopria robertsi
ESV_427610	NCBI	86.6	MN362232	Eukaryota	Arthropoda	Arachnida	Trombidiformes	Tydeidae
ESV_427620	BOLD	89.5	NGLGA123-18	Animalia	Arthropoda	Insecta	Lepidoptera	Scythrididae	Scythris	Scythris bifissella
ESV_427620	BOLD	89.2	LNAUT102-14	Animalia	Arthropoda	Insecta	Lepidoptera	Lycaenidae	Cupido	Cupido amyntula
ESV_427620	BOLD	88.8	LNAUW1251-17	Animalia	Arthropoda	Insecta	Lepidoptera	Thyrididae	Dysodia	Dysodia flagrata
ESV_427620	BOLD	88.5	LNAUY1256-19	Animalia	Arthropoda	Insecta	Lepidoptera	Tineidae	Bythocrates	Bythocrates drosocycla
ESV_427620	BOLD	88.5	LNAUV1090-17	Animalia	Arthropoda	Insecta	Lepidoptera	Gracillariidae	Eucosmophora	Eucosmophora pouteriae
ESV_427626	BOLD	97.1	CRBAC16902-22	Animalia	Arthropoda	Insecta	Diptera	Cecidomyiidae
ESV_427626	BOLD	96.8	CRBLC31370-22	Animalia	Arthropoda	Insecta	Diptera	Cecidomyiidae
ESV_427626	BOLD	96.2	CRTOA38119-22	Animalia	Arthropoda	Insecta	Diptera	Cecidomyiidae
ESV_427631	BOLD	99.4	TRIHM20034-23	Animalia	Arthropoda	Insecta	Diptera	Cecidomyiidae
ESV_427631	BOLD	99.4	TRIHM23506-23	Animalia	Arthropoda	Insecta	Diptera	Cecidomyiidae
ESV_427631	BOLD	99.4	TRIHM25060-23	Animalia	Arthropoda	Insecta	Diptera	Cecidomyiidae
ESV_427631	BOLD	99	TRIHM12924-22	Animalia	Arthropoda	Insecta	Diptera	Cecidomyiidae
ESV_427631	BOLD	99	GMPAK418-18	Animalia	Arthropoda	Insecta	Diptera	Cecidomyiidae
ESV_427631	BOLD	98.7	LPGEN11491-24	Animalia	Arthropoda	Insecta	Diptera	Cecidomyiidae
ESV_427631	BOLD	98.7	LPGEN9248-24	Animalia	Arthropoda	Insecta	Diptera	Cecidomyiidae
ESV_427631	BOLD	98.7	GMCNA23321-21	Animalia	Arthropoda	Insecta	Diptera	Cecidomyiidae
ESV_427631	BOLD	98.7	ONTA49592-23	Animalia	Arthropoda	Insecta	Diptera	Cecidomyiidae
ESV_427631	BOLD	98.4	LPGEN8782-24	Animalia	Arthropoda	Insecta	Diptera	Cecidomyiidae
ESV_427631	BOLD	98.4	CRHYA10261-22	Animalia	Arthropoda	Insecta	Diptera	Cecidomyiidae
ESV_427631	BOLD	98.4	CRHYA49906-22	Animalia	Arthropoda	Insecta	Diptera	Cecidomyiidae
ESV_427631	BOLD	98.4	CRHYA32223-22	Animalia	Arthropoda	Insecta	Diptera	Cecidomyiidae
ESV_427631	BOLD	98.4	CRPSA19146-23	Animalia	Arthropoda	Insecta	Diptera	Cecidomyiidae
ESV_427631	BOLD	98.4	EMCEB4731-22	Animalia	Arthropoda	Insecta	Diptera	Cecidomyiidae
ESV_427631	BOLD	98.4	GMCNA11718-21	Animalia	Arthropoda	Insecta	Diptera	Cecidomyiidae
ESV_427631	BOLD	98.4	GMCNA13733-21	Animalia	Arthropoda	Insecta	Diptera	Cecidomyiidae
ESV_427631	BOLD	98.4	GMCNA13983-21	Animalia	Arthropoda	Insecta	Diptera	Cecidomyiidae
ESV_427631	BOLD	98.4	GMCNA15145-21	Animalia	Arthropoda	Insecta	Diptera	Cecidomyiidae
ESV_427631	BOLD	98.4	GMCNA22308-21	Animalia	Arthropoda	Insecta	Diptera	Cecidomyiidae
ESV_427631	BOLD	98.4	GMCNA22835-21	Animalia	Arthropoda	Insecta	Diptera	Cecidomyiidae
ESV_427631	BOLD	98.4	GMCNA25152-21	Animalia	Arthropoda	Insecta	Diptera	Cecidomyiidae
ESV_427631	BOLD	98.4	GMCNA25098-21	Animalia	Arthropoda	Insecta	Diptera	Cecidomyiidae
ESV_427631	BOLD	98.4	GMCNA26355-21	Animalia	Arthropoda	Insecta	Diptera	Cecidomyiidae
ESV_427631	BOLD	98.4	GMCNA26660-21	Animalia	Arthropoda	Insecta	Diptera	Cecidomyiidae
ESV_427631	BOLD	98.4	GMCNA27810-21	Animalia	Arthropoda	Insecta	Diptera	Cecidomyiidae
ESV_427631	BOLD	98.4	GMCNA29743-21	Animalia	Arthropoda	Insecta	Diptera	Cecidomyiidae
ESV_427631	BOLD	98.4	GMCNA30010-21	Animalia	Arthropoda	Insecta	Diptera	Cecidomyiidae
ESV_427631	BOLD	98.4	GMCNA31441-21	Animalia	Arthropoda	Insecta	Diptera	Cecidomyiidae
ESV_427631	BOLD	98.4	GMCNA35350-21	Animalia	Arthropoda	Insecta	Diptera	Cecidomyiidae
ESV_427631	BOLD	98.4	GMCNA36707-21	Animalia	Arthropoda	Insecta	Diptera	Cecidomyiidae
ESV_427631	BOLD	98.4	GMCNA36856-21	Animalia	Arthropoda	Insecta	Diptera	Cecidomyiidae
ESV_427631	BOLD	98.4	GMCNA39085-21	Animalia	Arthropoda	Insecta	Diptera	Cecidomyiidae
ESV_427631	BOLD	98.4	GMCNA42150-21	Animalia	Arthropoda	Insecta	Diptera	Cecidomyiidae
ESV_427631	BOLD	98.4	GMCNA42336-21	Animalia	Arthropoda	Insecta	Diptera	Cecidomyiidae
ESV_427631	BOLD	98.4	GMCNA46066-21	Animalia	Arthropoda	Insecta	Diptera	Cecidomyiidae
ESV_427631	BOLD	98.4	GMCNA46619-21	Animalia	Arthropoda	Insecta	Diptera	Cecidomyiidae
ESV_427631	BOLD	98.4	GMCNA46789-21	Animalia	Arthropoda	Insecta	Diptera	Cecidomyiidae
ESV_427631	BOLD	98.4	GMCNA47049-21	Animalia	Arthropoda	Insecta	Diptera	Cecidomyiidae
ESV_427631	BOLD	98.4	GMCNA47015-21	Animalia	Arthropoda	Insecta	Diptera	Cecidomyiidae
ESV_427631	BOLD	98.4	GMCNA51767-21	Animalia	Arthropoda	Insecta	Diptera	Cecidomyiidae
ESV_427631	BOLD	98.4	GMCNB3299-21	Animalia	Arthropoda	Insecta	Diptera	Cecidomyiidae
ESV_427631	BOLD	98.4	GMCNB7420-21	Animalia	Arthropoda	Insecta	Diptera	Cecidomyiidae
ESV_427631	BOLD	98.4	CRLSB10228-24	Animalia	Arthropoda	Insecta	Diptera	Cecidomyiidae
ESV_427631	BOLD	98.4	CRLSB11676-24	Animalia	Arthropoda	Insecta	Diptera	Cecidomyiidae
ESV_427631	BOLD	98.4	CRLSB1003-24	Animalia	Arthropoda	Insecta	Diptera	Cecidomyiidae
ESV_427631	BOLD	98.4	CRLSB1032-24	Animalia	Arthropoda	Insecta	Diptera	Cecidomyiidae
ESV_427631	BOLD	98.4	CRLSB1116-24	Animalia	Arthropoda	Insecta	Diptera	Cecidomyiidae
ESV_427631	BOLD	98.4	CRLSB1721-24	Animalia	Arthropoda	Insecta	Diptera	Cecidomyiidae
ESV_427631	BOLD	98.4	CRLSB19798-24	Animalia	Arthropoda	Insecta	Diptera	Cecidomyiidae
ESV_427631	BOLD	98.4	CRLSB225-24	Animalia	Arthropoda	Insecta	Diptera	Cecidomyiidae
ESV_427631	BOLD	98.4	CRLSB7335-24	Animalia	Arthropoda	Insecta	Diptera	Cecidomyiidae
ESV_427631	BOLD	98.4	CRLSB31765-24	Animalia	Arthropoda	Insecta	Diptera	Cecidomyiidae
ESV_427631	BOLD	98.4	CRLSB33326-24	Animalia	Arthropoda	Insecta	Diptera	Cecidomyiidae
ESV_427631	BOLD	98.4	CRMLG4214-24	Animalia	Arthropoda	Insecta	Diptera	Cecidomyiidae
ESV_427631	BOLD	98.4	CRMLG4395-24	Animalia	Arthropoda	Insecta	Diptera	Cecidomyiidae
ESV_427631	BOLD	98.4	CRMLH4236-24	Animalia	Arthropoda	Insecta	Diptera	Cecidomyiidae
ESV_427631	BOLD	98.4	CRSOA277-24	Animalia	Arthropoda	Insecta	Diptera	Cecidomyiidae
ESV_427631	BOLD	98.4	GMCNA27814-21	Animalia	Arthropoda	Insecta	Diptera	Cecidomyiidae
ESV_427631	BOLD	98.4	GMCNA36772-21	Animalia	Arthropoda	Insecta	Diptera	Cecidomyiidae
ESV_427631	BOLD	98.4	GMCNA39205-21	Animalia	Arthropoda	Insecta	Diptera	Cecidomyiidae
ESV_427631	BOLD	98.4	GMCRP212-13	Animalia	Arthropoda	Insecta	Diptera	Cecidomyiidae
ESV_427631	BOLD	98.4	GMCNA34677-21	Animalia	Arthropoda	Insecta	Coleoptera
ESV_427642	BOLD	96.5	LNAUX1069-18	Animalia	Arthropoda	Insecta	Lepidoptera	Erebidae	Leucoma	Leucoma impressa
ESV_427642	BOLD	96.5	LNAUV1005-17	Animalia	Arthropoda	Insecta	Lepidoptera	Nepticulidae	Muhabbetana	Muhabbetana royenicola
ESV_427744	BOLD	85.3	LNAUV2542-17	Animalia	Arthropoda	Insecta	Lepidoptera	Geometridae	Casbia	Casbia carnecostata
ESV_427839	BOLD	94.2	CRCBD7294-23	Animalia	Arthropoda	Insecta	Diptera	Cecidomyiidae
ESV_427839	BOLD	93.6	CRCBB3328-23	Animalia	Arthropoda	Insecta	Diptera	Cecidomyiidae
ESV_427839	BOLD	93.6	CRHYA14150-22	Animalia	Arthropoda	Insecta	Diptera	Cecidomyiidae
ESV_427839	BOLD	93.6	CRMLB1872-24	Animalia	Arthropoda	Insecta	Diptera	Cecidomyiidae
ESV_427839	BOLD	93.6	GMCRP208-13	Animalia	Arthropoda	Insecta	Diptera	Cecidomyiidae
ESV_427839	BOLD	93.3	CRCEB29892-22	Animalia	Arthropoda	Insecta	Diptera	Cecidomyiidae
ESV_427839	BOLD	93.3	CRCBC52975-23	Animalia	Arthropoda	Insecta	Diptera	Cecidomyiidae
ESV_427839	BOLD	93.3	CRMLA7885-24	Animalia	Arthropoda	Insecta	Diptera	Cecidomyiidae
ESV_427839	BOLD	93.3	CRMNA3682-24	Animalia	Arthropoda	Insecta	Diptera	Cecidomyiidae
ESV_427839	BOLD	93.3	CRTOA29517-21	Animalia	Arthropoda	Insecta	Diptera	Cecidomyiidae
ESV_427839	BOLD	93.3	CRTOB6143-22	Animalia	Arthropoda	Insecta	Diptera	Cecidomyiidae
ESV_427839	BOLD	93.3	CRTOD2962-23	Animalia	Arthropoda	Insecta	Diptera	Cecidomyiidae
ESV_427839	BOLD	93.3	CRTOD3475-23	Animalia	Arthropoda	Insecta	Diptera	Cecidomyiidae
ESV_427839	BOLD	93.3	GMCRR280-13	Animalia	Arthropoda	Insecta	Diptera	Cecidomyiidae
ESV_427906	BOLD	93.3	GMPPO17897-22	Animalia	Arthropoda	Insecta	Diptera	Cecidomyiidae
ESV_427906	BOLD	93.3	CRALD7216-23	Animalia	Arthropoda	Insecta	Diptera	Cecidomyiidae
ESV_427906	BOLD	93.3	CRBLD9073-23	Animalia	Arthropoda	Insecta	Diptera	Cecidomyiidae
ESV_427906	BOLD	93	GMPPO9207-21	Animalia	Arthropoda	Insecta	Diptera	Cecidomyiidae
ESV_427906	BOLD	93	CRBAD546-23	Animalia	Arthropoda	Insecta	Diptera	Cecidomyiidae
ESV_427906	BOLD	93	CRBAD4424-23	Animalia	Arthropoda	Insecta	Diptera	Cecidomyiidae
ESV_427906	BOLD	93	CRBAD8232-24	Animalia	Arthropoda	Insecta	Diptera	Cecidomyiidae
ESV_427906	BOLD	93	CRBLD12200-23	Animalia	Arthropoda	Insecta	Diptera	Cecidomyiidae
ESV_427906	BOLD	93	CRMLA4785-24	Animalia	Arthropoda	Insecta	Diptera	Cecidomyiidae
ESV_427906	BOLD	93	CRSIC576-23	Animalia	Arthropoda	Insecta	Diptera	Cecidomyiidae
ESV_427906	BOLD	93	CRSIC2340-23	Animalia	Arthropoda	Insecta	Diptera	Cecidomyiidae
ESV_427906	BOLD	93	CRSIC5155-23	Animalia	Arthropoda	Insecta	Diptera	Cecidomyiidae
ESV_427906	BOLD	93	CRSIC6114-23	Animalia	Arthropoda	Insecta	Diptera	Cecidomyiidae
ESV_427906	BOLD	93	CRSRA16234-22	Animalia	Arthropoda	Insecta	Diptera	Cecidomyiidae
ESV_427906	BOLD	93	CRSRA19702-22	Animalia	Arthropoda	Insecta	Diptera	Cecidomyiidae
ESV_427906	BOLD	93	CRSRD14152-24	Animalia	Arthropoda	Insecta	Diptera	Cecidomyiidae
ESV_427906	BOLD	93	CRSRD4804-23	Animalia	Arthropoda	Insecta	Diptera	Cecidomyiidae
ESV_427906	BOLD	93	CRSRD7735-23	Animalia	Arthropoda	Insecta	Diptera	Cecidomyiidae
ESV_427906	BOLD	93	CRSRD23816-24	Animalia	Arthropoda	Insecta	Diptera	Cecidomyiidae
ESV_427906	BOLD	93	CRSRD8852-23	Animalia	Arthropoda	Insecta	Diptera	Cecidomyiidae
ESV_427906	BOLD	93	CRSRD9919-23	Animalia	Arthropoda	Insecta	Diptera	Cecidomyiidae
ESV_427906	BOLD	93	GMAGE2642-15	Animalia	Arthropoda	Insecta	Diptera	Cecidomyiidae
ESV_427906	BOLD	93	GMAGU378-15	Animalia	Arthropoda	Insecta	Diptera	Cecidomyiidae
ESV_427906	BOLD	93	GMARP140-14	Animalia	Arthropoda	Insecta	Diptera	Cecidomyiidae
ESV_427906	BOLD	93	GMARR670-14	Animalia	Arthropoda	Insecta	Diptera	Cecidomyiidae
ESV_427906	BOLD	93	GMARR747-14	Animalia	Arthropoda	Insecta	Diptera	Cecidomyiidae
ESV_427906	BOLD	93	GMARS249-14	Animalia	Arthropoda	Insecta	Diptera	Cecidomyiidae
ESV_427906	BOLD	93	LPGEP2165-24	Animalia	Arthropoda	Insecta	Diptera	Cecidomyiidae
ESV_427906	BOLD	93	ONTB20801-23	Animalia	Arthropoda	Insecta	Diptera	Cecidomyiidae
ESV_427906	BOLD	93	ONTB8870-23	Animalia	Arthropoda	Insecta	Diptera	Cecidomyiidae
ESV_427906	BOLD	92.7	CRALB21533-21	Animalia	Arthropoda	Insecta	Diptera	Cecidomyiidae
ESV_427906	BOLD	92.7	CRHYA43478-22	Animalia	Arthropoda	Insecta	Diptera	Cecidomyiidae
ESV_427906	BOLD	92.7	CROAB7325-21	Animalia	Arthropoda	Insecta	Diptera	Cecidomyiidae
ESV_427906	BOLD	92.7	CROCA2294-21	Animalia	Arthropoda	Insecta	Diptera	Cecidomyiidae
ESV_427906	BOLD	92.7	CRSIB6302-22	Animalia	Arthropoda	Insecta	Diptera	Cecidomyiidae
ESV_427906	BOLD	92.7	CRSRA23899-22	Animalia	Arthropoda	Insecta	Diptera	Cecidomyiidae
ESV_427906	BOLD	92.7	CRALD9267-23	Animalia	Arthropoda	Insecta	Diptera	Cecidomyiidae
ESV_427906	BOLD	92.7	CRATB30832-24	Animalia	Arthropoda	Insecta	Diptera	Cecidomyiidae
ESV_427906	BOLD	92.7	CRATB33104-24	Animalia	Arthropoda	Insecta	Diptera	Cecidomyiidae
ESV_427906	BOLD	92.7	CRATB39065-24	Animalia	Arthropoda	Insecta	Diptera	Cecidomyiidae
ESV_427906	BOLD	92.7	CRATB46139-24	Animalia	Arthropoda	Insecta	Diptera	Cecidomyiidae
ESV_427906	BOLD	92.7	CRATC25751-23	Animalia	Arthropoda	Insecta	Diptera	Cecidomyiidae
ESV_427906	BOLD	92.7	CRATD9944-24	Animalia	Arthropoda	Insecta	Diptera	Cecidomyiidae
ESV_427906	BOLD	92.7	CRBOF22868-24	Animalia	Arthropoda	Insecta	Diptera	Cecidomyiidae
ESV_427906	BOLD	92.7	CRBOF34502-24	Animalia	Arthropoda	Insecta	Diptera	Cecidomyiidae
ESV_427906	BOLD	92.7	CRBOG6890-23	Animalia	Arthropoda	Insecta	Diptera	Cecidomyiidae
ESV_427906	BOLD	92.7	CRBOH33434-24	Animalia	Arthropoda	Insecta	Diptera	Cecidomyiidae
ESV_427906	BOLD	92.7	CRBOH29256-24	Animalia	Arthropoda	Insecta	Diptera	Cecidomyiidae
ESV_427906	BOLD	92.7	CRBOH687-24	Animalia	Arthropoda	Insecta	Diptera	Cecidomyiidae
ESV_427906	BOLD	92.7	CRBOH731-24	Animalia	Arthropoda	Insecta	Diptera	Cecidomyiidae
ESV_427906	BOLD	92.7	CRBOH6219-24	Animalia	Arthropoda	Insecta	Diptera	Cecidomyiidae
ESV_427906	BOLD	92.7	CRBOI9932-24	Animalia	Arthropoda	Insecta	Diptera	Cecidomyiidae
ESV_427906	BOLD	92.7	CRCBD24910-23	Animalia	Arthropoda	Insecta	Diptera	Cecidomyiidae
ESV_427906	BOLD	92.7	CRCBD41922-23	Animalia	Arthropoda	Insecta	Diptera	Cecidomyiidae
ESV_427906	BOLD	92.7	CRCED12358-23	Animalia	Arthropoda	Insecta	Diptera	Cecidomyiidae
ESV_427906	BOLD	92.7	CRCED16716-23	Animalia	Arthropoda	Insecta	Diptera	Cecidomyiidae
ESV_427906	BOLD	92.7	CRHYA15684-22	Animalia	Arthropoda	Insecta	Diptera	Cecidomyiidae
ESV_427906	BOLD	92.7	CRHYA7820-22	Animalia	Arthropoda	Insecta	Diptera	Cecidomyiidae
ESV_427906	BOLD	92.7	CRMBA16880-24	Animalia	Arthropoda	Insecta	Diptera	Cecidomyiidae
ESV_427906	BOLD	92.7	CRMBA23160-24	Animalia	Arthropoda	Insecta	Diptera	Cecidomyiidae
ESV_427906	BOLD	92.7	CRMBA26799-24	Animalia	Arthropoda	Insecta	Diptera	Cecidomyiidae
ESV_427906	BOLD	92.7	CRMBA45353-24	Animalia	Arthropoda	Insecta	Diptera	Cecidomyiidae
ESV_427906	BOLD	92.7	CRMBA46180-24	Animalia	Arthropoda	Insecta	Diptera	Cecidomyiidae
ESV_427906	BOLD	92.7	CRMLA10316-24	Animalia	Arthropoda	Insecta	Diptera	Cecidomyiidae
ESV_427906	BOLD	92.7	CRMLA10695-24	Animalia	Arthropoda	Insecta	Diptera	Cecidomyiidae
ESV_427906	BOLD	92.7	CRMLF3498-24	Animalia	Arthropoda	Insecta	Diptera	Cecidomyiidae
ESV_427906	BOLD	92.7	CRMLE6956-24	Animalia	Arthropoda	Insecta	Diptera	Cecidomyiidae
ESV_427906	BOLD	92.7	CRMLE3613-24	Animalia	Arthropoda	Insecta	Diptera	Cecidomyiidae
ESV_427906	BOLD	92.7	CRMLE5541-24	Animalia	Arthropoda	Insecta	Diptera	Cecidomyiidae
ESV_427906	BOLD	92.7	CRMLH3586-24	Animalia	Arthropoda	Insecta	Diptera	Cecidomyiidae
ESV_427906	BOLD	92.7	CRMLI4971-24	Animalia	Arthropoda	Insecta	Diptera	Cecidomyiidae
ESV_427906	BOLD	92.7	CROCA4487-21	Animalia	Arthropoda	Insecta	Diptera	Cecidomyiidae
ESV_427906	BOLD	92.4	CROCA37168-21	Animalia	Arthropoda	Insecta	Diptera
ESV_427906	BOLD	92.3	CRALB41321-21	Animalia	Arthropoda	Insecta	Diptera	Cecidomyiidae
ESV_427906	BOLD	92.3	CRBAC622-22	Animalia	Arthropoda	Insecta	Diptera	Cecidomyiidae
ESV_427906	BOLD	92.3	CRHYA28890-22	Animalia	Arthropoda	Insecta	Diptera	Cecidomyiidae
ESV_427906	BOLD	92.3	CRHYA38440-22	Animalia	Arthropoda	Insecta	Diptera	Cecidomyiidae
ESV_427906	BOLD	92.3	CRHYB5619-22	Animalia	Arthropoda	Insecta	Diptera	Cecidomyiidae
ESV_427906	BOLD	92.3	CROAB45827-21	Animalia	Arthropoda	Insecta	Diptera	Cecidomyiidae
ESV_427906	BOLD	92.3	CROAE369-22	Animalia	Arthropoda	Insecta	Diptera	Cecidomyiidae
ESV_427906	BOLD	92.3	CROAE416-22	Animalia	Arthropoda	Insecta	Diptera	Cecidomyiidae
ESV_427906	BOLD	92.3	CROCA10695-21	Animalia	Arthropoda	Insecta	Diptera	Cecidomyiidae
ESV_427906	BOLD	92.3	CROCA8972-21	Animalia	Arthropoda	Insecta	Diptera	Cecidomyiidae
ESV_427906	BOLD	92.3	CRQZA48056-22	Animalia	Arthropoda	Insecta	Diptera	Cecidomyiidae
ESV_427906	BOLD	92.3	CRSIA20867-22	Animalia	Arthropoda	Insecta	Diptera	Cecidomyiidae
ESV_427906	BOLD	92.3	CRSIA9616-21	Animalia	Arthropoda	Insecta	Diptera	Cecidomyiidae
ESV_427906	BOLD	92.3	CRSRA1082-22	Animalia	Arthropoda	Insecta	Diptera	Cecidomyiidae
ESV_427906	BOLD	92.3	CRSRA14012-22	Animalia	Arthropoda	Insecta	Diptera	Cecidomyiidae
ESV_427906	BOLD	92.3	GBCAA6216-24	Animalia	Arthropoda	Insecta	Diptera	Cecidomyiidae
ESV_427906	BOLD	92.3	GMPPO10240-21	Animalia	Arthropoda	Insecta	Hemiptera
ESV_427913	BOLD	99.7	CRBOF17981-24	Animalia	Arthropoda	Insecta	Diptera	Cecidomyiidae
ESV_427913	BOLD	99.7	CRBOF22481-24	Animalia	Arthropoda	Insecta	Diptera	Cecidomyiidae
ESV_427913	BOLD	99.7	CRBOF43580-24	Animalia	Arthropoda	Insecta	Diptera	Cecidomyiidae
ESV_427913	BOLD	99.7	CRBOF8269-23	Animalia	Arthropoda	Insecta	Diptera	Cecidomyiidae
ESV_427913	BOLD	99.7	CRBOI14921-24	Animalia	Arthropoda	Insecta	Diptera	Cecidomyiidae
ESV_427913	BOLD	99.7	CRBOI20260-24	Animalia	Arthropoda	Insecta	Diptera	Cecidomyiidae
ESV_427913	BOLD	99.7	CRBOI3305-24	Animalia	Arthropoda	Insecta	Diptera	Cecidomyiidae
ESV_427913	BOLD	99.7	CRBOI26507-24	Animalia	Arthropoda	Insecta	Diptera	Cecidomyiidae
ESV_427913	BOLD	99.7	CRBOI27387-24	Animalia	Arthropoda	Insecta	Diptera	Cecidomyiidae
ESV_427913	BOLD	99.7	CRLDA40904-24	Animalia	Arthropoda	Insecta	Diptera	Cecidomyiidae
ESV_427913	BOLD	99.7	CRMNF5531-24	Animalia	Arthropoda	Insecta	Diptera	Cecidomyiidae
ESV_427913	BOLD	99.7	CROAB12411-21	Animalia	Arthropoda	Insecta	Diptera	Cecidomyiidae
ESV_427913	BOLD	99.7	CROAB15182-21	Animalia	Arthropoda	Insecta	Diptera	Cecidomyiidae
ESV_427913	BOLD	99.7	CROAB22093-21	Animalia	Arthropoda	Insecta	Diptera	Cecidomyiidae
ESV_427913	BOLD	99.7	CROZA24172-21	Animalia	Arthropoda	Insecta	Diptera	Cecidomyiidae
ESV_427913	BOLD	99.7	CROZA35744-21	Animalia	Arthropoda	Insecta	Diptera	Cecidomyiidae
ESV_427913	BOLD	99.7	CROZA48386-21	Animalia	Arthropoda	Insecta	Diptera	Cecidomyiidae
ESV_427913	BOLD	99.4	CRBOA56810-23	Animalia	Arthropoda	Insecta	Diptera	Cecidomyiidae
ESV_427913	BOLD	99.4	CROAB14032-21	Animalia	Arthropoda	Insecta	Diptera	Cecidomyiidae
ESV_427913	BOLD	99.4	CROAB14763-21	Animalia	Arthropoda	Insecta	Diptera	Cecidomyiidae
ESV_427913	BOLD	99.4	CROAB15144-21	Animalia	Arthropoda	Insecta	Diptera	Cecidomyiidae
ESV_427913	BOLD	99.4	CROAB15045-21	Animalia	Arthropoda	Insecta	Diptera	Cecidomyiidae
ESV_427913	BOLD	99.4	CROAB20827-21	Animalia	Arthropoda	Insecta	Diptera	Cecidomyiidae
ESV_427913	BOLD	99.4	CROAB20956-21	Animalia	Arthropoda	Insecta	Diptera	Cecidomyiidae
ESV_427913	BOLD	99.4	CROAB23096-21	Animalia	Arthropoda	Insecta	Diptera	Cecidomyiidae
ESV_427913	BOLD	99.4	CROAB31437-21	Animalia	Arthropoda	Insecta	Diptera	Cecidomyiidae
ESV_427913	BOLD	99.4	CROAB42800-21	Animalia	Arthropoda	Insecta	Diptera	Cecidomyiidae
ESV_427913	BOLD	99.4	CROAB7504-21	Animalia	Arthropoda	Insecta	Diptera	Cecidomyiidae
ESV_427913	BOLD	99.4	CROZA142-21	Animalia	Arthropoda	Insecta	Diptera	Cecidomyiidae
ESV_427913	BOLD	99.4	CROZA11372-21	Animalia	Arthropoda	Insecta	Diptera	Cecidomyiidae
ESV_427913	BOLD	99.4	CROZA12749-21	Animalia	Arthropoda	Insecta	Diptera	Cecidomyiidae
ESV_427913	BOLD	99.4	CROZA17852-21	Animalia	Arthropoda	Insecta	Diptera	Cecidomyiidae
ESV_427913	BOLD	99.4	CROZA19786-21	Animalia	Arthropoda	Insecta	Diptera	Cecidomyiidae
ESV_427913	BOLD	99.4	CROZA19975-21	Animalia	Arthropoda	Insecta	Diptera	Cecidomyiidae
ESV_427913	BOLD	99.4	CROZA20053-21	Animalia	Arthropoda	Insecta	Diptera	Cecidomyiidae
ESV_427913	BOLD	99.4	CROZA21746-21	Animalia	Arthropoda	Insecta	Diptera	Cecidomyiidae
ESV_427913	BOLD	99.4	CROZA23144-21	Animalia	Arthropoda	Insecta	Diptera	Cecidomyiidae
ESV_427913	BOLD	99.4	CROZA33214-21	Animalia	Arthropoda	Insecta	Diptera	Cecidomyiidae
ESV_427913	BOLD	99.4	CROZA35850-21	Animalia	Arthropoda	Insecta	Diptera	Cecidomyiidae
ESV_427913	BOLD	99.4	CROZA46578-21	Animalia	Arthropoda	Insecta	Diptera	Cecidomyiidae
ESV_427913	BOLD	99.4	CROZA46814-21	Animalia	Arthropoda	Insecta	Diptera	Cecidomyiidae
ESV_427913	BOLD	99.4	CROZA47364-21	Animalia	Arthropoda	Insecta	Diptera	Cecidomyiidae
ESV_427913	BOLD	99.4	CROZA49993-21	Animalia	Arthropoda	Insecta	Diptera	Cecidomyiidae
ESV_427913	BOLD	99.4	CROZA8975-21	Animalia	Arthropoda	Insecta	Diptera	Cecidomyiidae
ESV_427913	BOLD	99.4	CROZA9975-21	Animalia	Arthropoda	Insecta	Diptera	Cecidomyiidae
ESV_427913	BOLD	99.4	CRSIA10974-21	Animalia	Arthropoda	Insecta	Diptera	Cecidomyiidae
ESV_427913	BOLD	99.4	CRSIA43549-22	Animalia	Arthropoda	Insecta	Diptera	Cecidomyiidae
ESV_427913	BOLD	99.4	CRSIA43559-22	Animalia	Arthropoda	Insecta	Diptera	Cecidomyiidae
ESV_427913	BOLD	99.4	GMCNB6523-21	Animalia	Arthropoda	Insecta	Diptera	Cecidomyiidae
ESV_427913	BOLD	99.4	CRBOE26167-23	Animalia	Arthropoda	Insecta	Diptera	Cecidomyiidae
ESV_427913	BOLD	99.4	CRBOF10490-24	Animalia	Arthropoda	Insecta	Diptera	Cecidomyiidae
ESV_427913	BOLD	99.4	CRBOF11052-24	Animalia	Arthropoda	Insecta	Diptera	Cecidomyiidae
ESV_427913	BOLD	99.4	CRBOF23194-24	Animalia	Arthropoda	Insecta	Diptera	Cecidomyiidae
ESV_427913	BOLD	99.4	CRBOF19625-24	Animalia	Arthropoda	Insecta	Diptera	Cecidomyiidae
ESV_427913	BOLD	99.4	CRBOI20067-24	Animalia	Arthropoda	Insecta	Diptera	Cecidomyiidae
ESV_427913	BOLD	99.4	CRLSB29057-24	Animalia	Arthropoda	Insecta	Diptera	Cecidomyiidae
ESV_427913	BOLD	99	CRKAS28190-23	Animalia	Arthropoda	Insecta	Diptera	Cecidomyiidae
ESV_427913	BOLD	99	CROAC4007-21	Animalia	Arthropoda	Insecta	Diptera	Cecidomyiidae
ESV_427913	BOLD	99	CROAC6387-21	Animalia	Arthropoda	Insecta	Diptera	Cecidomyiidae
ESV_427913	BOLD	99	CROAC6820-21	Animalia	Arthropoda	Insecta	Diptera	Cecidomyiidae
ESV_427913	BOLD	99	CROAD10574-22	Animalia	Arthropoda	Insecta	Diptera	Cecidomyiidae
ESV_427913	BOLD	99	CROAD11956-22	Animalia	Arthropoda	Insecta	Diptera	Cecidomyiidae
ESV_427913	BOLD	99	CROAD421-22	Animalia	Arthropoda	Insecta	Diptera	Cecidomyiidae
ESV_427913	BOLD	99	CROAD4782-22	Animalia	Arthropoda	Insecta	Diptera	Cecidomyiidae
ESV_427913	BOLD	99	CROZA16599-21	Animalia	Arthropoda	Insecta	Diptera	Cecidomyiidae
ESV_427913	BOLD	99	CRSIA35338-22	Animalia	Arthropoda	Insecta	Diptera	Cecidomyiidae
ESV_427913	BOLD	99	CRSIA7633-21	Animalia	Arthropoda	Insecta	Diptera	Cecidomyiidae
ESV_427913	BOLD	99	CROAB20352-21	Animalia	Arthropoda	Insecta	Diptera	Cecidomyiidae
ESV_427913	BOLD	99	CROAB21438-21	Animalia	Arthropoda	Insecta	Diptera	Cecidomyiidae
ESV_427913	BOLD	99	CROAB6275-21	Animalia	Arthropoda	Insecta	Diptera	Cecidomyiidae
ESV_427913	BOLD	99	CROAE7733-23	Animalia	Arthropoda	Insecta	Diptera	Cecidomyiidae
ESV_427913	BOLD	99	CROZA19085-21	Animalia	Arthropoda	Insecta	Diptera	Cecidomyiidae
ESV_427913	BOLD	99	CROZA21613-21	Animalia	Arthropoda	Insecta	Diptera	Cecidomyiidae
ESV_427913	BOLD	99	CROZA21968-21	Animalia	Arthropoda	Insecta	Diptera	Cecidomyiidae
ESV_427913	BOLD	99	CROZA21975-21	Animalia	Arthropoda	Insecta	Diptera	Cecidomyiidae
ESV_427913	BOLD	99	CROZA36187-21	Animalia	Arthropoda	Insecta	Diptera	Cecidomyiidae
ESV_427913	BOLD	99	CROZA46037-21	Animalia	Arthropoda	Insecta	Diptera	Cecidomyiidae
ESV_427913	BOLD	99	CRSIA43629-22	Animalia	Arthropoda	Insecta	Diptera	Cecidomyiidae
ESV_427913	BOLD	98.7	CROAB47406-21	Animalia	Arthropoda	Insecta	Diptera	Cecidomyiidae
ESV_427913	BOLD	98.7	CROAC12164-21	Animalia	Arthropoda	Insecta	Diptera	Cecidomyiidae
ESV_427913	BOLD	98.7	CROAC6688-21	Animalia	Arthropoda	Insecta	Diptera	Cecidomyiidae
ESV_427913	BOLD	98.7	CROAC7504-21	Animalia	Arthropoda	Insecta	Diptera	Cecidomyiidae
ESV_427913	BOLD	98.7	CROZA34473-21	Animalia	Arthropoda	Insecta	Diptera	Cecidomyiidae
ESV_427913	BOLD	98.7	CROZA48757-21	Animalia	Arthropoda	Insecta	Diptera	Cecidomyiidae
ESV_427913	BOLD	98.7	CRSIA49501-22	Animalia	Arthropoda	Insecta	Diptera	Cecidomyiidae
ESV_427913	BOLD	98.7	CRSIA9840-21	Animalia	Arthropoda	Insecta	Diptera	Cecidomyiidae
ESV_427913	BOLD	98.7	CRSIB3414-22	Animalia	Arthropoda	Insecta	Diptera	Cecidomyiidae
ESV_427913	BOLD	98.7	CROAC12965-21	Animalia	Arthropoda	Insecta	Diptera	Cecidomyiidae
ESV_427913	BOLD	98.7	CROAC6982-21	Animalia	Arthropoda	Insecta	Diptera	Cecidomyiidae
ESV_427913	BOLD	98.7	CRSIA47970-22	Animalia	Arthropoda	Insecta	Psocodea
ESV_427915	BOLD	93.3	CRBOE41353-23	Animalia	Arthropoda	Insecta	Diptera	Cecidomyiidae
ESV_427915	BOLD	93.3	CRMNB6135-24	Animalia	Arthropoda	Insecta	Diptera	Cecidomyiidae
ESV_427915	BOLD	93.3	PLPDD1974-20	Animalia	Arthropoda	Insecta	Diptera	Cecidomyiidae
ESV_427915	BOLD	93.3	CRBOH15191-24	Animalia	Arthropoda	Insecta	Diptera
ESV_427915	BOLD	93.3	CRBOH33246-24	Animalia	Arthropoda	Insecta	Diptera
ESV_427915	BOLD	92.6	PLLBA2316-20	Animalia	Arthropoda	Insecta	Diptera	Cecidomyiidae
ESV_427915	BOLD	92.6	CRMBA20640-24	Animalia	Arthropoda	Insecta	Diptera	Cecidomyiidae
ESV_427915	BOLD	92.6	GMAGC250-15	Animalia	Arthropoda	Insecta	Diptera	Cecidomyiidae
ESV_427915	BOLD	92.3	PLLBA2314-20	Animalia	Arthropoda	Insecta	Diptera	Cecidomyiidae
ESV_427915	BOLD	92.3	CRATB43754-24	Animalia	Arthropoda	Insecta	Diptera	Cecidomyiidae
ESV_427915	BOLD	92.3	CRATB46557-24	Animalia	Arthropoda	Insecta	Diptera	Cecidomyiidae
ESV_427915	BOLD	92.3	CRATE19590-24	Animalia	Arthropoda	Insecta	Diptera	Cecidomyiidae
ESV_427915	BOLD	92.3	CRCCF35429-24	Animalia	Arthropoda	Insecta	Diptera	Cecidomyiidae
ESV_427929	BOLD	97.7	GMMVA31321-22	Animalia	Arthropoda	Insecta	Diptera	Chironomidae
ESV_427929	BOLD	97.4	CRBLD26551-24	Animalia	Arthropoda	Insecta	Diptera	Chironomidae
ESV_427929	BOLD	97.1	CRBLC31672-22	Animalia	Arthropoda	Insecta	Diptera	Chironomidae
ESV_427929	BOLD	97.1	CROAD24336-22	Animalia	Arthropoda	Insecta	Diptera	Chironomidae
ESV_427929	BOLD	97.1	CROAD25004-22	Animalia	Arthropoda	Insecta	Diptera	Chironomidae
ESV_427929	BOLD	97.1	CROAD27508-22	Animalia	Arthropoda	Insecta	Diptera	Chironomidae
ESV_427929	BOLD	97.1	CROZA28175-21	Animalia	Arthropoda	Insecta	Diptera	Chironomidae
ESV_427929	BOLD	97.1	CRSRA42860-22	Animalia	Arthropoda	Insecta	Diptera	Chironomidae
ESV_427929	BOLD	97.1	CRSRA44481-22	Animalia	Arthropoda	Insecta	Diptera	Chironomidae
ESV_427929	BOLD	97.1	CRBAC14331-22	Animalia	Arthropoda	Insecta	Diptera	Chironomidae
ESV_427929	BOLD	97.1	CRTOA34166-22	Animalia	Arthropoda	Insecta	Diptera	Chironomidae
ESV_427929	BOLD	97.1	CRTOA42798-22	Animalia	Arthropoda	Insecta	Diptera	Chironomidae
ESV_427929	BOLD	97.1	CRBLD11123-23	Animalia	Arthropoda	Insecta	Diptera	Chironomidae
ESV_427929	BOLD	96.8	CRDOA2461-21	Animalia	Arthropoda	Insecta	Diptera	Chironomidae
ESV_427929	BOLD	96.8	CROAD31557-22	Animalia	Arthropoda	Insecta	Diptera	Chironomidae
ESV_427929	BOLD	96.8	CRTOB4061-22	Animalia	Arthropoda	Insecta	Diptera	Chironomidae
ESV_427932	BOLD	91.8	PLLBE8085-20	Animalia	Arthropoda	Insecta	Hemiptera	Diaspididae
ESV_427939	BOLD	93.1	CRSEA6145-23	Animalia	Arthropoda	Insecta	Hymenoptera	Mymaridae
ESV_427939	BOLD	93.1	CRSGA11383-23	Animalia	Arthropoda	Insecta	Hymenoptera	Mymaridae
ESV_427939	BOLD	92.8	PLFDA1403-20	Animalia	Arthropoda	Insecta	Hymenoptera	Mymaridae
ESV_427939	BOLD	92.8	PLNDM1065-20	Animalia	Arthropoda	Insecta	Hymenoptera	Mymaridae
ESV_427939	BOLD	92.8	CRBLD30063-24	Animalia	Arthropoda	Insecta	Hymenoptera	Mymaridae
ESV_427939	BOLD	92.8	LPGEO13611-24	Animalia	Arthropoda	Insecta	Hymenoptera
ESV_427939	BOLD	92.5	PLFDT976-20	Animalia	Arthropoda	Insecta	Hymenoptera	Mymaridae
ESV_427939	BOLD	92.5	PLSBQ645-20	Animalia	Arthropoda	Insecta	Hymenoptera	Mymaridae
ESV_427939	BOLD	92.5	CRPTA38994-24	Animalia	Arthropoda	Insecta	Hymenoptera	Mymaridae
ESV_427939	BOLD	92.5	CRPTD23177-25	Animalia	Arthropoda	Insecta	Hymenoptera	Mymaridae
ESV_427939	BOLD	92.2	CRATA18316-22	Animalia	Arthropoda	Insecta	Hymenoptera	Mymaridae	Camptoptera
ESV_427939	BOLD	92.2	PLAEY562-21	Animalia	Arthropoda	Insecta	Hymenoptera	Mymaridae
ESV_427939	BOLD	92.2	PLFDY1479-20	Animalia	Arthropoda	Insecta	Hymenoptera	Mymaridae
ESV_427939	BOLD	92.2	CRPTA32128-24	Animalia	Arthropoda	Insecta	Hymenoptera	Mymaridae
ESV_427939	BOLD	92.2	CRPTA28284-24	Animalia	Arthropoda	Insecta	Hymenoptera	Mymaridae
ESV_427939	BOLD	92.2	CRPTA34483-24	Animalia	Arthropoda	Insecta	Hymenoptera	Mymaridae
ESV_427939	BOLD	92.2	CRPTB8253-24	Animalia	Arthropoda	Insecta	Hymenoptera	Mymaridae
ESV_427939	BOLD	92.2	CRPTC42455-25	Animalia	Arthropoda	Insecta	Hymenoptera	Mymaridae
ESV_427939	BOLD	92.2	CRPTD33949-25	Animalia	Arthropoda	Insecta	Hymenoptera	Mymaridae
ESV_427939	BOLD	92.2	CRPTD38170-25	Animalia	Arthropoda	Insecta	Hymenoptera	Mymaridae
ESV_427939	BOLD	92.2	LPGEN9905-24	Animalia	Arthropoda	Insecta	Hymenoptera
ESV_427958	NCBI	100	MF987864	Eukaryota	Arthropoda	Collembola	Entomobryomorpha	Entomobryidae
ESV_427959	BOLD	93	EMSCB2034-22	Animalia	Arthropoda	Insecta	Hemiptera	Aleyrodidae
ESV_427959	BOLD	93	EMSCB2309-22	Animalia	Arthropoda	Insecta	Hemiptera	Aleyrodidae
ESV_427959	BOLD	93	EMSCB4982-22	Animalia	Arthropoda	Insecta	Hemiptera	Aleyrodidae
ESV_427959	BOLD	93	EMSCB4984-22	Animalia	Arthropoda	Insecta	Hemiptera	Aleyrodidae
ESV_427959	BOLD	93	EMSCB4987-22	Animalia	Arthropoda	Insecta	Hemiptera	Aleyrodidae
ESV_427959	BOLD	93	EMSCB4993-22	Animalia	Arthropoda	Insecta	Hemiptera	Aleyrodidae
ESV_427959	BOLD	93	GMSPA50812-22	Animalia	Arthropoda	Insecta	Hemiptera	Aleyrodidae
ESV_427959	BOLD	92.7	EMSCB7385-22	Animalia	Arthropoda	Insecta	Hemiptera	Aleyrodidae
ESV_427959	BOLD	92.7	EMSCB7706-22	Animalia	Arthropoda	Insecta	Hemiptera	Aleyrodidae
ESV_427959	BOLD	92.7	EMSCB8601-22	Animalia	Arthropoda	Insecta	Hemiptera	Aleyrodidae
ESV_427959	BOLD	92.3	EMSCB3321-22	Animalia	Arthropoda	Insecta	Hemiptera	Aleyrodidae
ESV_427959	BOLD	92.3	EMSCB4990-22	Animalia	Arthropoda	Insecta	Hemiptera	Aleyrodidae
ESV_427959	BOLD	92.3	EMSCB5003-22	Animalia	Arthropoda	Insecta	Hemiptera	Aleyrodidae
ESV_427959	BOLD	92.3	EMSCB5027-22	Animalia	Arthropoda	Insecta	Hemiptera	Aleyrodidae
ESV_427959	BOLD	92.3	EMSCB7704-22	Animalia	Arthropoda	Insecta	Hemiptera	Aleyrodidae
ESV_427959	BOLD	92.3	EMSCB8022-22	Animalia	Arthropoda	Insecta	Hemiptera	Aleyrodidae
ESV_427959	BOLD	92.3	GMSPA13370-21	Animalia	Arthropoda	Insecta	Hemiptera	Aleyrodidae
ESV_427959	BOLD	92.3	GMSPB36526-23	Animalia	Arthropoda	Insecta	Hemiptera	Aleyrodidae
ESV_427959	BOLD	92.3	GMSPC2182-23	Animalia	Arthropoda	Insecta	Hemiptera	Aleyrodidae
ESV_427959	BOLD	92.3	GMSPA50321-22	Animalia	Arthropoda	Insecta	Hemiptera	Aleyrodidae
ESV_427959	BOLD	92	EMSCB2379-22	Animalia	Arthropoda	Insecta	Hemiptera	Aleyrodidae
ESV_427959	BOLD	92	EMSCB4981-22	Animalia	Arthropoda	Insecta	Hemiptera	Aleyrodidae
ESV_427959	BOLD	92	EMSCB4986-22	Animalia	Arthropoda	Insecta	Hemiptera	Aleyrodidae
ESV_427959	BOLD	92	EMSCB5973-22	Animalia	Arthropoda	Insecta	Hemiptera	Aleyrodidae
ESV_427959	BOLD	92	EMSCB6457-22	Animalia	Arthropoda	Insecta	Hemiptera	Aleyrodidae
ESV_427975	BOLD	96.2	CRBOB17067-23	Animalia	Arthropoda	Insecta	Diptera	Cecidomyiidae
ESV_427976	BOLD	98.4	CRATD33394-24	Animalia	Arthropoda	Insecta	Diptera	Cecidomyiidae
ESV_427976	BOLD	97.8	CRALB40686-21	Animalia	Arthropoda	Insecta	Diptera	Cecidomyiidae
ESV_427976	BOLD	97.8	CRATA26810-22	Animalia	Arthropoda	Insecta	Diptera	Cecidomyiidae
ESV_427976	BOLD	97.8	CRATD33571-24	Animalia	Arthropoda	Insecta	Diptera	Cecidomyiidae
ESV_427976	BOLD	97.8	CRBOF21996-24	Animalia	Arthropoda	Insecta	Diptera	Cecidomyiidae
ESV_427976	BOLD	97.8	CRCEB19004-22	Animalia	Arthropoda	Insecta	Diptera	Cecidomyiidae
ESV_427976	BOLD	97.4	CRCEA16616-21	Animalia	Arthropoda	Insecta	Diptera	Cecidomyiidae
ESV_427976	BOLD	97.4	CRLDC23194-24	Animalia	Arthropoda	Insecta	Diptera	Cecidomyiidae
ESV_427977	BOLD	98.1	CRBOA9725-23	Animalia	Arthropoda	Insecta	Diptera	Cecidomyiidae
ESV_427977	BOLD	97.4	PLIDI020-20	Animalia	Arthropoda	Insecta	Diptera	Cecidomyiidae
ESV_427977	BOLD	97.1	PLBCA292-20	Animalia	Arthropoda	Insecta	Diptera	Cecidomyiidae
ESV_427978	BOLD	94.2	CRCBC37238-23	Animalia	Arthropoda	Insecta	Diptera	Cecidomyiidae
ESV_427978	BOLD	94.2	CRLDB1918-24	Animalia	Arthropoda	Insecta	Diptera	Cecidomyiidae
ESV_427978	BOLD	94.2	CRPTA31530-24	Animalia	Arthropoda	Insecta	Diptera	Cecidomyiidae
ESV_427978	BOLD	94.2	CRPTD15010-25	Animalia	Arthropoda	Insecta	Diptera	Cecidomyiidae
ESV_427978	BOLD	93.9	CRPTD17243-25	Animalia	Arthropoda	Insecta	Diptera	Cecidomyiidae
ESV_427978	BOLD	93.9	CRBOF8388-23	Animalia	Arthropoda	Insecta	Diptera
ESV_427978	BOLD	93.3	CRBOE16907-23	Animalia	Arthropoda	Insecta	Diptera	Cecidomyiidae
ESV_427978	BOLD	93.3	CRSIA22754-22	Animalia	Arthropoda	Insecta	Diptera	Cecidomyiidae
ESV_427978	BOLD	93.3	CROAE4114-23	Animalia	Arthropoda	Insecta	Diptera	Cecidomyiidae
ESV_427983	BOLD	88.8	LNAUX823-18	Animalia	Arthropoda	Insecta	Lepidoptera	Tineidae	Monopis	Monopis weaverella
ESV_427983	BOLD	87.9	LNAUY730-19	Animalia	Arthropoda	Insecta	Lepidoptera	Noctuidae	Pastona
ESV_427994	BOLD	96.5	CRTOD3994-23	Animalia	Arthropoda	Insecta	Diptera	Cecidomyiidae
ESV_427994	BOLD	96.2	CRBLA34803-22	Animalia	Arthropoda	Insecta	Diptera	Cecidomyiidae
ESV_427994	BOLD	96.2	CRBLC16964-22	Animalia	Arthropoda	Insecta	Diptera	Cecidomyiidae
ESV_427994	BOLD	96.2	CRTOB37971-22	Animalia	Arthropoda	Insecta	Diptera	Cecidomyiidae
ESV_427994	BOLD	96.2	CRSRD11532-23	Animalia	Arthropoda	Insecta	Diptera	Cecidomyiidae
ESV_427994	BOLD	96.2	CRSRD19479-24	Animalia	Arthropoda	Insecta	Diptera	Cecidomyiidae
ESV_427994	BOLD	96.2	CRTOD8804-23	Animalia	Arthropoda	Insecta	Diptera	Cecidomyiidae
ESV_427994	BOLD	95.8	CRTOA35997-22	Animalia	Arthropoda	Insecta	Diptera	Cecidomyiidae
ESV_427994	BOLD	95.8	CRTOB13019-22	Animalia	Arthropoda	Insecta	Diptera	Cecidomyiidae
ESV_427994	BOLD	95.8	CRTOB14782-22	Animalia	Arthropoda	Insecta	Diptera	Cecidomyiidae
ESV_427994	BOLD	95.8	CRTOB15119-22	Animalia	Arthropoda	Insecta	Diptera	Cecidomyiidae
ESV_427994	BOLD	95.8	CRTOB9581-22	Animalia	Arthropoda	Insecta	Diptera	Cecidomyiidae
ESV_427994	BOLD	95.8	CRTOC1641-22	Animalia	Arthropoda	Insecta	Diptera	Cecidomyiidae
ESV_427994	BOLD	95.8	CRTOC9389-22	Animalia	Arthropoda	Insecta	Diptera	Cecidomyiidae
ESV_427994	BOLD	95.8	CRSIA31125-22	Animalia	Arthropoda	Insecta	Diptera	Cecidomyiidae
ESV_427994	BOLD	95.8	CRSRA1075-22	Animalia	Arthropoda	Insecta	Diptera	Cecidomyiidae
ESV_427994	BOLD	95.8	CRSRD18680-24	Animalia	Arthropoda	Insecta	Diptera	Cecidomyiidae
ESV_427994	BOLD	95.8	CRSRD18618-24	Animalia	Arthropoda	Insecta	Diptera	Cecidomyiidae
ESV_427994	BOLD	95.8	CRSRD8360-23	Animalia	Arthropoda	Insecta	Diptera	Cecidomyiidae
ESV_427994	BOLD	95.8	CRSRD7786-23	Animalia	Arthropoda	Insecta	Diptera	Cecidomyiidae
ESV_427994	BOLD	95.8	CRSRD25149-24	Animalia	Arthropoda	Insecta	Diptera	Cecidomyiidae
ESV_427994	BOLD	95.5	PLBDJ134-20	Animalia	Arthropoda	Insecta	Diptera	Cecidomyiidae	Asteromyia
ESV_427994	BOLD	95.5	CRTOA5061-21	Animalia	Arthropoda	Insecta	Diptera	Cecidomyiidae
ESV_427994	BOLD	95.5	CRTOB13375-22	Animalia	Arthropoda	Insecta	Diptera	Cecidomyiidae
ESV_427994	BOLD	95.5	CRTOB14766-22	Animalia	Arthropoda	Insecta	Diptera	Cecidomyiidae
ESV_427994	BOLD	95.5	CRTOB38695-22	Animalia	Arthropoda	Insecta	Diptera	Cecidomyiidae
ESV_427994	BOLD	95.5	CRTOC12157-22	Animalia	Arthropoda	Insecta	Diptera	Cecidomyiidae
ESV_427994	BOLD	95.5	CRTOC7809-22	Animalia	Arthropoda	Insecta	Diptera	Cecidomyiidae
ESV_427994	BOLD	95.5	CRTRA23479-22	Animalia	Arthropoda	Insecta	Diptera	Cecidomyiidae
ESV_427994	BOLD	95.5	CRBAA35363-22	Animalia	Arthropoda	Insecta	Diptera	Cecidomyiidae
ESV_427994	BOLD	95.5	CRHTA18150-22	Animalia	Arthropoda	Insecta	Diptera	Cecidomyiidae
ESV_427994	BOLD	95.5	CRHYA25451-22	Animalia	Arthropoda	Insecta	Diptera	Cecidomyiidae
ESV_427994	BOLD	95.5	CRSIA14491-21	Animalia	Arthropoda	Insecta	Diptera	Cecidomyiidae
ESV_427994	BOLD	95.5	CRSIA15880-22	Animalia	Arthropoda	Insecta	Diptera	Cecidomyiidae
ESV_427994	BOLD	95.5	CRSIA37327-22	Animalia	Arthropoda	Insecta	Diptera	Cecidomyiidae
ESV_427994	BOLD	95.5	CRSRA13940-22	Animalia	Arthropoda	Insecta	Diptera	Cecidomyiidae
ESV_427994	BOLD	95.5	CRSIA26397-22	Animalia	Arthropoda	Insecta	Diptera	Cecidomyiidae
ESV_427994	BOLD	95.5	CRSRD11392-23	Animalia	Arthropoda	Insecta	Diptera	Cecidomyiidae
ESV_427997	BOLD	100	ONTA32970-23	Animalia	Arthropoda	Insecta	Diptera	Cecidomyiidae
ESV_428001	BOLD	99.4	CRBOF16846-24	Animalia	Arthropoda	Insecta	Diptera	Cecidomyiidae
ESV_428001	BOLD	99.4	CRBOF43120-24	Animalia	Arthropoda	Insecta	Diptera	Cecidomyiidae
ESV_428001	BOLD	99.4	CRCBC40630-23	Animalia	Arthropoda	Insecta	Diptera	Cecidomyiidae
ESV_428001	BOLD	99.4	CRCBD17497-23	Animalia	Arthropoda	Insecta	Diptera	Cecidomyiidae
ESV_428001	BOLD	99.4	CRHTA31062-22	Animalia	Arthropoda	Insecta	Diptera	Cecidomyiidae
ESV_428001	BOLD	99.4	CRHTA9385-22	Animalia	Arthropoda	Insecta	Diptera	Cecidomyiidae
ESV_428001	BOLD	99.4	CRTRA15975-22	Animalia	Arthropoda	Insecta	Diptera	Cecidomyiidae
ESV_428001	BOLD	99.4	ONTA29949-23	Animalia	Arthropoda	Insecta	Diptera	Cecidomyiidae
ESV_428001	BOLD	99.4	ONTA34132-23	Animalia	Arthropoda	Insecta	Diptera	Cecidomyiidae
ESV_428001	BOLD	99	CRBAA34907-22	Animalia	Arthropoda	Insecta	Diptera	Cecidomyiidae
ESV_428001	BOLD	99	CRBAA9524-22	Animalia	Arthropoda	Insecta	Diptera	Cecidomyiidae
ESV_428001	BOLD	99	CRHTA19865-22	Animalia	Arthropoda	Insecta	Diptera	Cecidomyiidae
ESV_428001	BOLD	99	CRHTA19991-22	Animalia	Arthropoda	Insecta	Diptera	Cecidomyiidae
ESV_428001	BOLD	99	CRHYB7202-22	Animalia	Arthropoda	Insecta	Diptera	Cecidomyiidae
ESV_428001	BOLD	99	CRTRA16340-22	Animalia	Arthropoda	Insecta	Diptera	Cecidomyiidae
ESV_428001	BOLD	99	CRTRB24239-22	Animalia	Arthropoda	Insecta	Diptera	Cecidomyiidae
ESV_428001	BOLD	98.7	CRBAA17662-22	Animalia	Arthropoda	Insecta	Diptera	Cecidomyiidae
ESV_428001	BOLD	98.7	CRBAA21937-22	Animalia	Arthropoda	Insecta	Diptera	Cecidomyiidae
ESV_428001	BOLD	98.7	CRBAA32129-22	Animalia	Arthropoda	Insecta	Diptera	Cecidomyiidae
ESV_428001	BOLD	98.7	CRBAA3910-22	Animalia	Arthropoda	Insecta	Diptera	Cecidomyiidae
ESV_428001	BOLD	98.7	CRBAA38502-22	Animalia	Arthropoda	Insecta	Diptera	Cecidomyiidae
ESV_428001	BOLD	98.7	CRBAA40341-22	Animalia	Arthropoda	Insecta	Diptera	Cecidomyiidae
ESV_428001	BOLD	98.7	CRBAA43587-22	Animalia	Arthropoda	Insecta	Diptera	Cecidomyiidae
ESV_428001	BOLD	98.7	CRBAA9340-22	Animalia	Arthropoda	Insecta	Diptera	Cecidomyiidae
ESV_428001	BOLD	98.7	CRBAC12176-22	Animalia	Arthropoda	Insecta	Diptera	Cecidomyiidae
ESV_428001	BOLD	98.7	CRBAC12296-22	Animalia	Arthropoda	Insecta	Diptera	Cecidomyiidae
ESV_428001	BOLD	98.7	CRBAC1788-22	Animalia	Arthropoda	Insecta	Diptera	Cecidomyiidae
ESV_428001	BOLD	98.7	CRBAC20181-22	Animalia	Arthropoda	Insecta	Diptera	Cecidomyiidae
ESV_428001	BOLD	98.7	CRBAC824-22	Animalia	Arthropoda	Insecta	Diptera	Cecidomyiidae
ESV_428001	BOLD	98.7	CRBLA11246-22	Animalia	Arthropoda	Insecta	Diptera	Cecidomyiidae
ESV_428001	BOLD	98.7	CRBLA5698-22	Animalia	Arthropoda	Insecta	Diptera	Cecidomyiidae
ESV_428001	BOLD	98.7	CRBLB11927-22	Animalia	Arthropoda	Insecta	Diptera	Cecidomyiidae
ESV_428001	BOLD	98.7	CRBLC52314-22	Animalia	Arthropoda	Insecta	Diptera	Cecidomyiidae
ESV_428001	BOLD	98.7	CRBOA49131-23	Animalia	Arthropoda	Insecta	Diptera	Cecidomyiidae
ESV_428001	BOLD	98.7	CRHTA16987-22	Animalia	Arthropoda	Insecta	Diptera	Cecidomyiidae
ESV_428001	BOLD	98.7	CRHTA18675-22	Animalia	Arthropoda	Insecta	Diptera	Cecidomyiidae
ESV_428001	BOLD	98.7	CRHTA19397-22	Animalia	Arthropoda	Insecta	Diptera	Cecidomyiidae
ESV_428001	BOLD	98.7	CRHTA20300-22	Animalia	Arthropoda	Insecta	Diptera	Cecidomyiidae
ESV_428001	BOLD	98.7	CRHTA20546-22	Animalia	Arthropoda	Insecta	Diptera	Cecidomyiidae
ESV_428001	BOLD	98.7	CRHTA20945-22	Animalia	Arthropoda	Insecta	Diptera	Cecidomyiidae
ESV_428001	BOLD	98.7	CRHTA23525-22	Animalia	Arthropoda	Insecta	Diptera	Cecidomyiidae
ESV_428001	BOLD	98.7	CRHTA24626-22	Animalia	Arthropoda	Insecta	Diptera	Cecidomyiidae
ESV_428001	BOLD	98.7	CRHTA25744-22	Animalia	Arthropoda	Insecta	Diptera	Cecidomyiidae
ESV_428001	BOLD	98.7	CRHTA5570-22	Animalia	Arthropoda	Insecta	Diptera	Cecidomyiidae
ESV_428001	BOLD	98.7	CRHTA35944-22	Animalia	Arthropoda	Insecta	Diptera	Cecidomyiidae
ESV_428001	BOLD	98.7	CRHTA7399-22	Animalia	Arthropoda	Insecta	Diptera	Cecidomyiidae
ESV_428001	BOLD	98.7	CRHTA7522-22	Animalia	Arthropoda	Insecta	Diptera	Cecidomyiidae
ESV_428001	BOLD	98.7	CRHYB9966-22	Animalia	Arthropoda	Insecta	Diptera	Cecidomyiidae
ESV_428001	BOLD	98.7	CRTRA12427-22	Animalia	Arthropoda	Insecta	Diptera	Cecidomyiidae
ESV_428001	BOLD	98.7	CRTRA13176-22	Animalia	Arthropoda	Insecta	Diptera	Cecidomyiidae
ESV_428001	BOLD	98.7	CRTRA17382-22	Animalia	Arthropoda	Insecta	Diptera	Cecidomyiidae
ESV_428001	BOLD	98.7	CRTRA18543-22	Animalia	Arthropoda	Insecta	Diptera	Cecidomyiidae
ESV_428001	BOLD	98.7	CRTRA19017-22	Animalia	Arthropoda	Insecta	Diptera	Cecidomyiidae
ESV_428001	BOLD	98.7	CRTRA19049-22	Animalia	Arthropoda	Insecta	Diptera	Cecidomyiidae
ESV_428001	BOLD	98.7	CRTRA379-22	Animalia	Arthropoda	Insecta	Diptera	Cecidomyiidae
ESV_428001	BOLD	98.7	CRTRA3733-22	Animalia	Arthropoda	Insecta	Diptera	Cecidomyiidae
ESV_428001	BOLD	98.7	CRTRA4948-22	Animalia	Arthropoda	Insecta	Diptera	Cecidomyiidae
ESV_428001	BOLD	98.7	CRTRA52168-22	Animalia	Arthropoda	Insecta	Diptera	Cecidomyiidae
ESV_428001	BOLD	98.7	CRTRA53150-22	Animalia	Arthropoda	Insecta	Diptera	Cecidomyiidae
ESV_428001	BOLD	98.7	CRTRB21579-22	Animalia	Arthropoda	Insecta	Diptera	Cecidomyiidae
ESV_428001	BOLD	98.7	CRTRB24316-22	Animalia	Arthropoda	Insecta	Diptera	Cecidomyiidae
ESV_428001	BOLD	98.7	CRTRB30284-22	Animalia	Arthropoda	Insecta	Diptera	Cecidomyiidae
ESV_428001	BOLD	98.7	CRTRB31412-22	Animalia	Arthropoda	Insecta	Diptera	Cecidomyiidae
ESV_428001	BOLD	98.7	CRBAA40503-22	Animalia	Arthropoda	Insecta	Hymenoptera
ESV_428001	BOLD	98.4	CRBAA12310-22	Animalia	Arthropoda	Insecta	Diptera	Cecidomyiidae
ESV_428001	BOLD	98.4	CRBAA32644-22	Animalia	Arthropoda	Insecta	Diptera	Cecidomyiidae
ESV_428001	BOLD	98.4	CRBAC6166-22	Animalia	Arthropoda	Insecta	Diptera	Cecidomyiidae
ESV_428001	BOLD	98.4	CRBLC36365-22	Animalia	Arthropoda	Insecta	Diptera	Cecidomyiidae
ESV_428001	BOLD	98.4	CRHTA24012-22	Animalia	Arthropoda	Insecta	Diptera	Cecidomyiidae
ESV_428001	BOLD	98.4	CRHTA24828-22	Animalia	Arthropoda	Insecta	Diptera	Cecidomyiidae
ESV_428001	BOLD	98.4	CRHTA25218-22	Animalia	Arthropoda	Insecta	Diptera	Cecidomyiidae
ESV_428001	BOLD	98.4	CRHTA26051-22	Animalia	Arthropoda	Insecta	Diptera	Cecidomyiidae
ESV_428001	BOLD	98.4	CRHTA28842-22	Animalia	Arthropoda	Insecta	Diptera	Cecidomyiidae
ESV_428001	BOLD	98.4	CRHTA33637-22	Animalia	Arthropoda	Insecta	Diptera	Cecidomyiidae
ESV_428001	BOLD	98.4	CRHTA34579-22	Animalia	Arthropoda	Insecta	Diptera	Cecidomyiidae
ESV_428001	BOLD	98.4	CRHTA9042-22	Animalia	Arthropoda	Insecta	Diptera	Cecidomyiidae
ESV_428001	BOLD	98.4	CRHYA40148-22	Animalia	Arthropoda	Insecta	Diptera	Cecidomyiidae
ESV_428001	BOLD	98.4	CRHYB1241-22	Animalia	Arthropoda	Insecta	Diptera	Cecidomyiidae
ESV_428001	BOLD	98.4	CRHYB1759-22	Animalia	Arthropoda	Insecta	Diptera	Cecidomyiidae
ESV_428001	BOLD	98.4	CRHYB9250-22	Animalia	Arthropoda	Insecta	Diptera	Cecidomyiidae
ESV_428001	BOLD	98.4	CRTRA12106-22	Animalia	Arthropoda	Insecta	Diptera	Cecidomyiidae
ESV_428001	BOLD	98.4	CRTRA18208-22	Animalia	Arthropoda	Insecta	Diptera	Cecidomyiidae
ESV_428001	BOLD	98.4	CRTRA18538-22	Animalia	Arthropoda	Insecta	Diptera	Cecidomyiidae
ESV_428001	BOLD	98.4	CRTRA19096-22	Animalia	Arthropoda	Insecta	Diptera	Cecidomyiidae
ESV_428001	BOLD	98.4	CRTRA27398-22	Animalia	Arthropoda	Insecta	Diptera	Cecidomyiidae
ESV_428001	BOLD	98.4	CRTRA31665-22	Animalia	Arthropoda	Insecta	Diptera	Cecidomyiidae
ESV_428001	BOLD	98.4	CRTRA33034-22	Animalia	Arthropoda	Insecta	Diptera	Cecidomyiidae
ESV_428001	BOLD	98.4	CRTRA34174-22	Animalia	Arthropoda	Insecta	Diptera	Cecidomyiidae
ESV_428001	BOLD	98.4	CRTRA34965-22	Animalia	Arthropoda	Insecta	Diptera	Cecidomyiidae
ESV_428001	BOLD	98.4	CRTRA38821-22	Animalia	Arthropoda	Insecta	Diptera	Cecidomyiidae
ESV_428001	BOLD	98.4	CRTRA39045-22	Animalia	Arthropoda	Insecta	Diptera	Cecidomyiidae
ESV_428001	BOLD	98.4	CRTRA51730-22	Animalia	Arthropoda	Insecta	Diptera	Cecidomyiidae
ESV_428001	BOLD	98.4	CRTRB16632-22	Animalia	Arthropoda	Insecta	Diptera	Cecidomyiidae
ESV_428001	BOLD	98.4	CRTRB21826-22	Animalia	Arthropoda	Insecta	Diptera	Cecidomyiidae
ESV_428001	BOLD	98.4	CRTRB24203-22	Animalia	Arthropoda	Insecta	Diptera	Cecidomyiidae
ESV_428001	BOLD	98.4	CRTRB24411-22	Animalia	Arthropoda	Insecta	Diptera	Cecidomyiidae
ESV_428001	BOLD	98.4	CRTRB26861-22	Animalia	Arthropoda	Insecta	Diptera	Cecidomyiidae
ESV_428001	BOLD	98.4	CRTRB27173-22	Animalia	Arthropoda	Insecta	Diptera	Cecidomyiidae
ESV_428001	BOLD	98.4	CRTRB27208-22	Animalia	Arthropoda	Insecta	Diptera	Cecidomyiidae
ESV_428001	BOLD	98.4	CRHTA23988-22	Animalia	Arthropoda	Insecta	Diptera
ESV_428035	BOLD	95.2	CRBOA9725-23	Animalia	Arthropoda	Insecta	Diptera	Cecidomyiidae
ESV_428035	BOLD	94.6	CROAB16237-21	Animalia	Arthropoda	Insecta	Diptera	Cecidomyiidae
ESV_428035	BOLD	94.6	CROAB45273-21	Animalia	Arthropoda	Insecta	Diptera	Cecidomyiidae
ESV_428035	BOLD	94.6	PLIDI020-20	Animalia	Arthropoda	Insecta	Diptera	Cecidomyiidae
ESV_428035	BOLD	94.2	PLBCA292-20	Animalia	Arthropoda	Insecta	Diptera	Cecidomyiidae
ESV_428035	BOLD	94.2	PLNDE1344-20	Animalia	Arthropoda	Insecta	Diptera	Cecidomyiidae
ESV_428037	BOLD	94.9	CRTOD3994-23	Animalia	Arthropoda	Insecta	Diptera	Cecidomyiidae
ESV_428037	BOLD	94.6	CRBLA34803-22	Animalia	Arthropoda	Insecta	Diptera	Cecidomyiidae
ESV_428037	BOLD	94.6	CRBLC16964-22	Animalia	Arthropoda	Insecta	Diptera	Cecidomyiidae
ESV_428037	BOLD	94.6	CRTOB37971-22	Animalia	Arthropoda	Insecta	Diptera	Cecidomyiidae
ESV_428037	BOLD	94.6	CRSRD11532-23	Animalia	Arthropoda	Insecta	Diptera	Cecidomyiidae
ESV_428037	BOLD	94.6	CRSRD19479-24	Animalia	Arthropoda	Insecta	Diptera	Cecidomyiidae
ESV_428037	BOLD	94.6	CRTOD8804-23	Animalia	Arthropoda	Insecta	Diptera	Cecidomyiidae
ESV_428037	BOLD	94.2	CRTOA35997-22	Animalia	Arthropoda	Insecta	Diptera	Cecidomyiidae
ESV_428037	BOLD	94.2	CRTOB13019-22	Animalia	Arthropoda	Insecta	Diptera	Cecidomyiidae
ESV_428037	BOLD	94.2	CRTOB14782-22	Animalia	Arthropoda	Insecta	Diptera	Cecidomyiidae
ESV_428037	BOLD	94.2	CRTOB15119-22	Animalia	Arthropoda	Insecta	Diptera	Cecidomyiidae
ESV_428037	BOLD	94.2	CRTOB9581-22	Animalia	Arthropoda	Insecta	Diptera	Cecidomyiidae
ESV_428037	BOLD	94.2	CRTOC1641-22	Animalia	Arthropoda	Insecta	Diptera	Cecidomyiidae
ESV_428037	BOLD	94.2	CRTOC9389-22	Animalia	Arthropoda	Insecta	Diptera	Cecidomyiidae
ESV_428037	BOLD	94.2	CRSIA31125-22	Animalia	Arthropoda	Insecta	Diptera	Cecidomyiidae
ESV_428037	BOLD	94.2	CRSRA1075-22	Animalia	Arthropoda	Insecta	Diptera	Cecidomyiidae
ESV_428037	BOLD	94.2	CRSRD18680-24	Animalia	Arthropoda	Insecta	Diptera	Cecidomyiidae
ESV_428037	BOLD	94.2	CRSRD18618-24	Animalia	Arthropoda	Insecta	Diptera	Cecidomyiidae
ESV_428037	BOLD	94.2	CRSRD8360-23	Animalia	Arthropoda	Insecta	Diptera	Cecidomyiidae
ESV_428037	BOLD	94.2	CRSRD7786-23	Animalia	Arthropoda	Insecta	Diptera	Cecidomyiidae
ESV_428037	BOLD	94.2	CRSRD25149-24	Animalia	Arthropoda	Insecta	Diptera	Cecidomyiidae
ESV_428037	BOLD	93.9	CRTOA5061-21	Animalia	Arthropoda	Insecta	Diptera	Cecidomyiidae
ESV_428037	BOLD	93.9	CRTOB13375-22	Animalia	Arthropoda	Insecta	Diptera	Cecidomyiidae
ESV_428037	BOLD	93.9	CRTOB14766-22	Animalia	Arthropoda	Insecta	Diptera	Cecidomyiidae
ESV_428037	BOLD	93.9	CRTOB38695-22	Animalia	Arthropoda	Insecta	Diptera	Cecidomyiidae
ESV_428037	BOLD	93.9	CRTOC12157-22	Animalia	Arthropoda	Insecta	Diptera	Cecidomyiidae
ESV_428037	BOLD	93.9	CRTOC7809-22	Animalia	Arthropoda	Insecta	Diptera	Cecidomyiidae
ESV_428037	BOLD	93.9	CRTRA23479-22	Animalia	Arthropoda	Insecta	Diptera	Cecidomyiidae
ESV_428037	BOLD	93.9	CRBAA35363-22	Animalia	Arthropoda	Insecta	Diptera	Cecidomyiidae
ESV_428037	BOLD	93.9	CRHTA18150-22	Animalia	Arthropoda	Insecta	Diptera	Cecidomyiidae
ESV_428037	BOLD	93.9	CRHYA25451-22	Animalia	Arthropoda	Insecta	Diptera	Cecidomyiidae
ESV_428037	BOLD	93.9	CRSIA14491-21	Animalia	Arthropoda	Insecta	Diptera	Cecidomyiidae
ESV_428037	BOLD	93.9	CRSIA15880-22	Animalia	Arthropoda	Insecta	Diptera	Cecidomyiidae
ESV_428037	BOLD	93.9	CRSIA37327-22	Animalia	Arthropoda	Insecta	Diptera	Cecidomyiidae
ESV_428037	BOLD	93.9	CRSRA13940-22	Animalia	Arthropoda	Insecta	Diptera	Cecidomyiidae
ESV_428037	BOLD	93.9	CRSIA26397-22	Animalia	Arthropoda	Insecta	Diptera	Cecidomyiidae
ESV_428037	BOLD	93.9	CRSRD11392-23	Animalia	Arthropoda	Insecta	Diptera	Cecidomyiidae
ESV_428037	BOLD	93.9	CRPTB33753-25	Animalia	Arthropoda	Insecta	Diptera	Cecidomyiidae
ESV_428037	BOLD	93.9	CRTOB30668-22	Animalia	Arthropoda	Insecta	Diptera	Cecidomyiidae
ESV_428037	BOLD	93.9	CRTOD8396-23	Animalia	Arthropoda	Insecta	Diptera	Cecidomyiidae
ESV_428037	BOLD	93.9	GMHDK396-13	Animalia	Arthropoda	Insecta	Diptera	Cecidomyiidae
ESV_428041	BOLD	98.4	CRLDC33582-24	Animalia	Arthropoda	Insecta	Diptera	Cecidomyiidae
ESV_428041	BOLD	98.4	CRPTA22821-24	Animalia	Arthropoda	Insecta	Diptera	Cecidomyiidae
ESV_428041	BOLD	98.4	CRPTC42851-25	Animalia	Arthropoda	Insecta	Diptera	Cecidomyiidae
ESV_428041	BOLD	98.4	CRPTC47187-25	Animalia	Arthropoda	Insecta	Diptera	Cecidomyiidae
ESV_428041	BOLD	97.7	PLSCI159-20	Animalia	Arthropoda	Insecta	Diptera	Cecidomyiidae
ESV_428074	BOLD	95.5	CRBAD1103-23	Animalia	Arthropoda	Insecta	Diptera	Cecidomyiidae
ESV_428074	BOLD	95.2	CRCCF22885-23	Animalia	Arthropoda	Insecta	Diptera	Cecidomyiidae	Asteromyia
ESV_428074	BOLD	95.2	CRCBB5998-23	Animalia	Arthropoda	Insecta	Diptera	Cecidomyiidae
ESV_428074	BOLD	95.2	CRATC4450-23	Animalia	Arthropoda	Insecta	Diptera	Cecidomyiidae
ESV_428074	BOLD	95.2	CRBLD27894-24	Animalia	Arthropoda	Insecta	Diptera	Cecidomyiidae
ESV_428074	BOLD	95.2	CRBOE44256-23	Animalia	Arthropoda	Insecta	Diptera	Cecidomyiidae
ESV_428074	BOLD	95.2	CRBOF19585-24	Animalia	Arthropoda	Insecta	Diptera	Cecidomyiidae
ESV_428074	BOLD	95.2	CRBTA41422-24	Animalia	Arthropoda	Insecta	Diptera	Cecidomyiidae
ESV_428074	BOLD	95.2	CRBTB15000-24	Animalia	Arthropoda	Insecta	Diptera	Cecidomyiidae
ESV_428074	BOLD	95.2	CRBTB23818-24	Animalia	Arthropoda	Insecta	Diptera	Cecidomyiidae
ESV_428074	BOLD	95.2	CRCBC45835-23	Animalia	Arthropoda	Insecta	Diptera	Cecidomyiidae
ESV_428074	BOLD	95.2	CRCCJ3808-24	Animalia	Arthropoda	Insecta	Diptera	Cecidomyiidae
ESV_428074	BOLD	95.2	CRLDC36946-24	Animalia	Arthropoda	Insecta	Diptera	Cecidomyiidae
ESV_428074	BOLD	95.2	CRPTA28805-24	Animalia	Arthropoda	Insecta	Diptera	Cecidomyiidae
ESV_428074	BOLD	95.2	CRPTA29495-24	Animalia	Arthropoda	Insecta	Diptera	Cecidomyiidae
ESV_428074	BOLD	95.2	CRPTA36809-24	Animalia	Arthropoda	Insecta	Diptera	Cecidomyiidae
ESV_428074	BOLD	95.2	CRPTB19459-25	Animalia	Arthropoda	Insecta	Diptera	Cecidomyiidae
ESV_428074	BOLD	95.2	CRPTB24560-25	Animalia	Arthropoda	Insecta	Diptera	Cecidomyiidae
ESV_428074	BOLD	95.2	CRPTB33490-25	Animalia	Arthropoda	Insecta	Diptera	Cecidomyiidae
ESV_428074	BOLD	95.2	CRPTC45843-25	Animalia	Arthropoda	Insecta	Diptera	Cecidomyiidae
ESV_428074	BOLD	95.2	CRSAA23955-24	Animalia	Arthropoda	Insecta	Diptera	Cecidomyiidae
ESV_428074	BOLD	95.2	CRSRD205-23	Animalia	Arthropoda	Insecta	Diptera	Cecidomyiidae
ESV_428074	BOLD	95.2	GMAGV564-15	Animalia	Arthropoda	Insecta	Diptera	Cecidomyiidae
ESV_428074	BOLD	95.2	GMARA1245-14	Animalia	Arthropoda	Insecta	Diptera	Cecidomyiidae
ESV_428074	BOLD	95.2	LMERC002-18	Animalia	Arthropoda	Insecta	Diptera	Cecidomyiidae
ESV_428074	BOLD	95.2	LPGEO32395-24	Animalia	Arthropoda	Insecta	Diptera	Cecidomyiidae
ESV_428074	BOLD	95.2	ONTA32970-23	Animalia	Arthropoda	Insecta	Diptera	Cecidomyiidae
ESV_428074	BOLD	95.2	CRPTD6605-25	Animalia	Arthropoda	Insecta	Diptera
ESV_428074	BOLD	94.9	PERMM26251-23	Animalia	Arthropoda	Insecta	Diptera	Cecidomyiidae
ESV_428074	BOLD	94.9	CRHYA32477-22	Animalia	Arthropoda	Insecta	Diptera	Cecidomyiidae
ESV_428074	BOLD	94.9	CRHYA33163-22	Animalia	Arthropoda	Insecta	Diptera	Cecidomyiidae
ESV_428074	BOLD	94.9	CRHYA33752-22	Animalia	Arthropoda	Insecta	Diptera	Cecidomyiidae
ESV_428074	BOLD	94.9	CRHYA35174-22	Animalia	Arthropoda	Insecta	Diptera	Cecidomyiidae
ESV_428074	BOLD	94.9	CRHYA8250-22	Animalia	Arthropoda	Insecta	Diptera	Cecidomyiidae
ESV_428074	BOLD	94.9	CRTRA1083-22	Animalia	Arthropoda	Insecta	Diptera	Cecidomyiidae
ESV_428074	BOLD	94.9	CRTRA56028-22	Animalia	Arthropoda	Insecta	Diptera	Cecidomyiidae
ESV_428074	BOLD	94.9	GBCAA5497-24	Animalia	Arthropoda	Insecta	Diptera	Cecidomyiidae
ESV_428074	BOLD	94.9	GBCAA7564-24	Animalia	Arthropoda	Insecta	Diptera	Cecidomyiidae
ESV_428074	BOLD	94.9	GBCAA8117-24	Animalia	Arthropoda	Insecta	Diptera	Cecidomyiidae
ESV_428074	BOLD	94.9	GBCAA9138-24	Animalia	Arthropoda	Insecta	Diptera	Cecidomyiidae
ESV_428074	BOLD	94.9	PLFFW276-21	Animalia	Arthropoda	Insecta	Diptera	Cecidomyiidae
ESV_428074	BOLD	94.9	CRBLD20269-24	Animalia	Arthropoda	Insecta	Diptera	Cecidomyiidae
ESV_428074	BOLD	94.9	CRBOE41560-23	Animalia	Arthropoda	Insecta	Diptera	Cecidomyiidae
ESV_428074	BOLD	94.9	CRBOH35177-24	Animalia	Arthropoda	Insecta	Diptera	Cecidomyiidae
ESV_428074	BOLD	94.9	CRBOH37065-24	Animalia	Arthropoda	Insecta	Diptera	Cecidomyiidae
ESV_428074	BOLD	94.9	CRBTB17536-24	Animalia	Arthropoda	Insecta	Diptera	Cecidomyiidae
ESV_428074	BOLD	94.9	CRBTE17169-24	Animalia	Arthropoda	Insecta	Diptera	Cecidomyiidae
ESV_428074	BOLD	94.9	CRCCL2699-24	Animalia	Arthropoda	Insecta	Diptera	Cecidomyiidae
ESV_428074	BOLD	94.9	CRCED7924-23	Animalia	Arthropoda	Insecta	Diptera	Cecidomyiidae
ESV_428074	BOLD	94.9	CRHYA31557-22	Animalia	Arthropoda	Insecta	Diptera	Cecidomyiidae
ESV_428074	BOLD	94.9	CRHYA35490-22	Animalia	Arthropoda	Insecta	Diptera	Cecidomyiidae
ESV_428074	BOLD	94.9	CRLDD30919-24	Animalia	Arthropoda	Insecta	Diptera	Cecidomyiidae
ESV_428074	BOLD	94.9	CRLSB14692-24	Animalia	Arthropoda	Insecta	Diptera	Cecidomyiidae
ESV_428074	BOLD	94.6	CRBLC7342-22	Animalia	Arthropoda	Insecta	Diptera	Cecidomyiidae
ESV_428074	BOLD	94.6	CRCBA13127-22	Animalia	Arthropoda	Insecta	Diptera	Cecidomyiidae
ESV_428074	BOLD	94.6	CRSRA38783-22	Animalia	Arthropoda	Insecta	Diptera	Cecidomyiidae
ESV_428074	BOLD	94.6	CRTOA15847-21	Animalia	Arthropoda	Insecta	Diptera	Cecidomyiidae
ESV_428074	BOLD	94.6	CRTOA19144-21	Animalia	Arthropoda	Insecta	Diptera	Cecidomyiidae
ESV_428074	BOLD	94.6	CRBAA27607-22	Animalia	Arthropoda	Insecta	Diptera	Cecidomyiidae
ESV_428074	BOLD	94.6	CRBAA37578-22	Animalia	Arthropoda	Insecta	Diptera	Cecidomyiidae
ESV_428074	BOLD	94.6	CRBLC26235-22	Animalia	Arthropoda	Insecta	Diptera	Cecidomyiidae
ESV_428074	BOLD	94.6	CRBOA18634-23	Animalia	Arthropoda	Insecta	Diptera	Cecidomyiidae
ESV_428074	BOLD	94.6	CRHTA10790-22	Animalia	Arthropoda	Insecta	Diptera	Cecidomyiidae
ESV_428074	BOLD	94.6	CRHTA644-22	Animalia	Arthropoda	Insecta	Diptera	Cecidomyiidae
ESV_428074	BOLD	94.6	CRHYA10516-22	Animalia	Arthropoda	Insecta	Diptera	Cecidomyiidae
ESV_428074	BOLD	94.6	CRHYA16710-22	Animalia	Arthropoda	Insecta	Diptera	Cecidomyiidae
ESV_428074	BOLD	94.6	CRHYA23967-22	Animalia	Arthropoda	Insecta	Diptera	Cecidomyiidae
ESV_428074	BOLD	94.6	CRTRA37575-22	Animalia	Arthropoda	Insecta	Diptera	Cecidomyiidae
ESV_428074	BOLD	94.6	CRTRA51621-22	Animalia	Arthropoda	Insecta	Diptera	Cecidomyiidae
ESV_428074	BOLD	94.6	PLFFL609-21	Animalia	Arthropoda	Insecta	Diptera	Cecidomyiidae
ESV_428074	BOLD	94.6	CRTRA46076-22	Animalia	Arthropoda	Insecta	Diptera	Phoridae
ESV_428090	BOLD	99.7	CRBOE40018-23	Animalia	Arthropoda	Insecta	Diptera	Cecidomyiidae
ESV_428090	BOLD	99.7	CRMNC2241-24	Animalia	Arthropoda	Insecta	Diptera	Cecidomyiidae
ESV_428090	BOLD	99.7	CRMNC2248-24	Animalia	Arthropoda	Insecta	Diptera	Cecidomyiidae
ESV_428090	BOLD	99.4	GMPAC1332-18	Animalia	Arthropoda	Insecta	Diptera	Cecidomyiidae
ESV_428090	BOLD	99.4	CRBOB30064-23	Animalia	Arthropoda	Insecta	Diptera	Cecidomyiidae
ESV_428090	BOLD	99.4	CRHTA20832-22	Animalia	Arthropoda	Insecta	Diptera	Cecidomyiidae
ESV_428090	BOLD	99.4	CRHTA24510-22	Animalia	Arthropoda	Insecta	Diptera	Cecidomyiidae
ESV_428090	BOLD	99.4	CRTOA11182-21	Animalia	Arthropoda	Insecta	Diptera	Cecidomyiidae
ESV_428090	BOLD	99.4	CRTOB32809-22	Animalia	Arthropoda	Insecta	Diptera	Cecidomyiidae
ESV_428090	BOLD	99.4	CRTOD2129-23	Animalia	Arthropoda	Insecta	Diptera	Cecidomyiidae
ESV_428090	BOLD	99.4	CRTOD4717-23	Animalia	Arthropoda	Insecta	Diptera	Cecidomyiidae
ESV_428090	BOLD	99.4	CRTRC2769-23	Animalia	Arthropoda	Insecta	Diptera	Cecidomyiidae
ESV_428090	BOLD	99.4	ONTB1721-23	Animalia	Arthropoda	Insecta	Diptera	Cecidomyiidae
ESV_428090	BOLD	99	CRTOA23013-21	Animalia	Arthropoda	Insecta	Diptera	Cecidomyiidae
ESV_428090	BOLD	99	CRTOC3831-22	Animalia	Arthropoda	Insecta	Diptera	Cecidomyiidae
ESV_428090	BOLD	99	GMPAC032-18	Animalia	Arthropoda	Insecta	Diptera	Cecidomyiidae
ESV_428090	BOLD	99	GMPAG237-18	Animalia	Arthropoda	Insecta	Diptera	Cecidomyiidae
ESV_428090	BOLD	99	CRHYA30098-22	Animalia	Arthropoda	Insecta	Diptera	Cecidomyiidae
ESV_428090	BOLD	99	CRHYA49296-22	Animalia	Arthropoda	Insecta	Diptera	Cecidomyiidae
ESV_428090	BOLD	99	CRTOA30002-21	Animalia	Arthropoda	Insecta	Diptera	Cecidomyiidae
ESV_428090	BOLD	99	CRTOB29618-22	Animalia	Arthropoda	Insecta	Diptera	Cecidomyiidae
ESV_428090	BOLD	99	CRHYB995-22	Animalia	Arthropoda	Insecta	Diptera	Cecidomyiidae
ESV_428090	BOLD	99	CRSIC637-23	Animalia	Arthropoda	Insecta	Diptera	Cecidomyiidae
ESV_428090	BOLD	99	CRSIC2042-23	Animalia	Arthropoda	Insecta	Diptera	Cecidomyiidae
ESV_428090	BOLD	99	CRSIC5482-23	Animalia	Arthropoda	Insecta	Diptera	Cecidomyiidae
ESV_428090	BOLD	99	CRSIC6354-23	Animalia	Arthropoda	Insecta	Diptera	Cecidomyiidae
ESV_428090	BOLD	99	CRSIC8419-23	Animalia	Arthropoda	Insecta	Diptera	Cecidomyiidae
ESV_428090	BOLD	99	CRSIC8432-23	Animalia	Arthropoda	Insecta	Diptera	Cecidomyiidae
ESV_428090	BOLD	99	CRSRA13735-22	Animalia	Arthropoda	Insecta	Diptera	Cecidomyiidae
ESV_428090	BOLD	99	CRSRD2382-23	Animalia	Arthropoda	Insecta	Diptera	Cecidomyiidae
ESV_428090	BOLD	99	CRSRD5763-23	Animalia	Arthropoda	Insecta	Diptera	Cecidomyiidae
ESV_428090	BOLD	99	CRSRD25817-24	Animalia	Arthropoda	Insecta	Diptera	Cecidomyiidae
ESV_428090	BOLD	98.7	CROAD12232-22	Animalia	Arthropoda	Insecta	Diptera	Cecidomyiidae
ESV_428090	BOLD	98.7	CRBOA12133-23	Animalia	Arthropoda	Insecta	Diptera	Cecidomyiidae
ESV_428090	BOLD	98.7	CRHYA49240-22	Animalia	Arthropoda	Insecta	Diptera	Cecidomyiidae
ESV_428090	BOLD	98.7	CRTOA21189-21	Animalia	Arthropoda	Insecta	Diptera	Cecidomyiidae
ESV_428090	BOLD	98.7	CRTOA22646-21	Animalia	Arthropoda	Insecta	Diptera	Cecidomyiidae
ESV_428090	BOLD	98.7	CRTOA23524-21	Animalia	Arthropoda	Insecta	Diptera	Cecidomyiidae
ESV_428090	BOLD	98.7	CRTOB6388-22	Animalia	Arthropoda	Insecta	Diptera	Cecidomyiidae
ESV_428090	BOLD	98.7	CRTOB6394-22	Animalia	Arthropoda	Insecta	Diptera	Cecidomyiidae
ESV_428090	BOLD	98.7	CRTOC4187-22	Animalia	Arthropoda	Insecta	Diptera	Cecidomyiidae
ESV_428090	BOLD	98.7	CRTOC7079-22	Animalia	Arthropoda	Insecta	Diptera	Cecidomyiidae
ESV_428090	BOLD	98.7	CRTOC8128-22	Animalia	Arthropoda	Insecta	Diptera	Cecidomyiidae
ESV_428090	BOLD	98.7	CRTOC8294-22	Animalia	Arthropoda	Insecta	Diptera	Cecidomyiidae
ESV_428090	BOLD	98.7	CRSIA14612-21	Animalia	Arthropoda	Insecta	Diptera	Cecidomyiidae
ESV_428090	BOLD	98.7	CRSIA47294-22	Animalia	Arthropoda	Insecta	Diptera	Cecidomyiidae
ESV_428090	BOLD	98.7	CRSIB4386-22	Animalia	Arthropoda	Insecta	Diptera	Cecidomyiidae
ESV_428090	BOLD	98.7	CRSIB5475-22	Animalia	Arthropoda	Insecta	Diptera	Cecidomyiidae
ESV_428090	BOLD	98.7	CRSRA304-22	Animalia	Arthropoda	Insecta	Diptera	Cecidomyiidae
ESV_428090	BOLD	98.7	CRSRA3332-22	Animalia	Arthropoda	Insecta	Diptera	Cecidomyiidae
ESV_428090	BOLD	98.7	CRSRA487-22	Animalia	Arthropoda	Insecta	Diptera	Cecidomyiidae
ESV_428090	BOLD	98.7	CRSRA8330-22	Animalia	Arthropoda	Insecta	Diptera	Cecidomyiidae
ESV_428090	BOLD	98.7	CRSRA9121-22	Animalia	Arthropoda	Insecta	Diptera	Cecidomyiidae
ESV_428090	BOLD	98.7	CRSRA9352-22	Animalia	Arthropoda	Insecta	Diptera	Cecidomyiidae
ESV_428090	BOLD	98.7	CRSRA9678-22	Animalia	Arthropoda	Insecta	Diptera	Cecidomyiidae
ESV_428090	BOLD	98.7	CRTOC11754-22	Animalia	Arthropoda	Insecta	Diptera	Cecidomyiidae
ESV_428090	BOLD	98.7	CRSIB5640-22	Animalia	Arthropoda	Insecta	Diptera
ESV_428095	BOLD	95.8	CRTOD10756-23	Animalia	Arthropoda	Insecta	Diptera	Cecidomyiidae
ESV_428095	BOLD	95.8	CRTOD3778-23	Animalia	Arthropoda	Insecta	Diptera	Cecidomyiidae
ESV_428095	BOLD	95.8	CRTOD4220-23	Animalia	Arthropoda	Insecta	Diptera	Cecidomyiidae
ESV_428095	BOLD	95.8	CRTOD4124-23	Animalia	Arthropoda	Insecta	Diptera	Cecidomyiidae
ESV_428095	BOLD	95.8	ONTA32439-23	Animalia	Arthropoda	Insecta	Diptera	Cecidomyiidae
ESV_428095	BOLD	95.5	CRTRA55497-22	Animalia	Arthropoda	Insecta	Diptera	Cecidomyiidae
ESV_428095	BOLD	95.5	CRBAD2121-23	Animalia	Arthropoda	Insecta	Diptera	Cecidomyiidae
ESV_428095	BOLD	95.5	CRBAD4300-23	Animalia	Arthropoda	Insecta	Diptera	Cecidomyiidae
ESV_428095	BOLD	95.5	CRBAD4483-23	Animalia	Arthropoda	Insecta	Diptera	Cecidomyiidae
ESV_428095	BOLD	95.5	CRBAD6855-24	Animalia	Arthropoda	Insecta	Diptera	Cecidomyiidae
ESV_428095	BOLD	95.5	CRBAD6861-24	Animalia	Arthropoda	Insecta	Diptera	Cecidomyiidae
ESV_428095	BOLD	95.5	CRBAD832-23	Animalia	Arthropoda	Insecta	Diptera	Cecidomyiidae
ESV_428095	BOLD	95.5	CRBAD858-23	Animalia	Arthropoda	Insecta	Diptera	Cecidomyiidae
ESV_428095	BOLD	95.5	CRBAD9367-24	Animalia	Arthropoda	Insecta	Diptera	Cecidomyiidae
ESV_428095	BOLD	95.5	CRBLD24907-24	Animalia	Arthropoda	Insecta	Diptera	Cecidomyiidae
ESV_428095	BOLD	95.2	CRTOC5858-22	Animalia	Arthropoda	Insecta	Diptera	Cecidomyiidae
ESV_428095	BOLD	95.2	CRBAA13339-22	Animalia	Arthropoda	Insecta	Diptera	Cecidomyiidae
ESV_428095	BOLD	95.2	CRBAA15478-22	Animalia	Arthropoda	Insecta	Diptera	Cecidomyiidae
ESV_428095	BOLD	95.2	CRBAA28541-22	Animalia	Arthropoda	Insecta	Diptera	Cecidomyiidae
ESV_428095	BOLD	95.2	CRBAA35503-22	Animalia	Arthropoda	Insecta	Diptera	Cecidomyiidae
ESV_428095	BOLD	95.2	CRBAA7579-22	Animalia	Arthropoda	Insecta	Diptera	Cecidomyiidae
ESV_428095	BOLD	95.2	CRBLA18813-22	Animalia	Arthropoda	Insecta	Diptera	Cecidomyiidae
ESV_428095	BOLD	95.2	CRBLA41380-22	Animalia	Arthropoda	Insecta	Diptera	Cecidomyiidae
ESV_428095	BOLD	95.2	CRCEC57048-22	Animalia	Arthropoda	Insecta	Diptera	Cecidomyiidae
ESV_428095	BOLD	95.2	CRCBD8122-23	Animalia	Arthropoda	Insecta	Diptera	Cecidomyiidae
ESV_428095	BOLD	95.2	CRCED6516-23	Animalia	Arthropoda	Insecta	Diptera	Cecidomyiidae
ESV_428095	BOLD	94.9	CRBAA17868-22	Animalia	Arthropoda	Insecta	Diptera	Cecidomyiidae
ESV_428095	BOLD	94.9	CRBAA17973-22	Animalia	Arthropoda	Insecta	Diptera	Cecidomyiidae
ESV_428095	BOLD	94.9	CRBAA44866-22	Animalia	Arthropoda	Insecta	Diptera	Cecidomyiidae
ESV_428095	BOLD	94.9	CRBAC7949-22	Animalia	Arthropoda	Insecta	Diptera	Cecidomyiidae
ESV_428095	BOLD	94.9	CRBLA16890-22	Animalia	Arthropoda	Insecta	Diptera	Cecidomyiidae
ESV_428095	BOLD	94.9	CRBLA18710-22	Animalia	Arthropoda	Insecta	Diptera	Cecidomyiidae
ESV_428095	BOLD	94.9	CRBLA21083-22	Animalia	Arthropoda	Insecta	Diptera	Cecidomyiidae
ESV_428095	BOLD	94.9	CRBLA41394-22	Animalia	Arthropoda	Insecta	Diptera	Cecidomyiidae
ESV_428095	BOLD	94.9	CRBLC54790-22	Animalia	Arthropoda	Insecta	Diptera	Cecidomyiidae
ESV_428095	BOLD	94.9	CRCEA37330-22	Animalia	Arthropoda	Insecta	Diptera	Cecidomyiidae
ESV_428095	BOLD	94.9	CRCEA37604-22	Animalia	Arthropoda	Insecta	Diptera	Cecidomyiidae
ESV_428095	BOLD	94.9	CRCEA4380-21	Animalia	Arthropoda	Insecta	Diptera	Cecidomyiidae
ESV_428095	BOLD	94.9	CRBAA7948-22	Animalia	Arthropoda	Insecta	Diptera	Cecidomyiidae
ESV_428095	BOLD	94.9	CRCEB10946-22	Animalia	Arthropoda	Insecta	Diptera	Cecidomyiidae
ESV_428095	BOLD	94.9	CRALC9638-21	Animalia	Arthropoda	Insecta	Diptera	Cecidomyiidae
ESV_428095	BOLD	94.9	CRALD3972-23	Animalia	Arthropoda	Insecta	Diptera	Cecidomyiidae
ESV_428095	BOLD	94.9	CRALD5446-23	Animalia	Arthropoda	Insecta	Diptera	Cecidomyiidae
ESV_428095	BOLD	94.9	CRATD33550-24	Animalia	Arthropoda	Insecta	Diptera	Cecidomyiidae
ESV_428101	BOLD	95.5	CRSRD18456-24	Animalia	Arthropoda	Insecta	Diptera	Cecidomyiidae
ESV_428101	BOLD	95.2	GMPAW193-18	Animalia	Arthropoda	Insecta	Diptera	Cecidomyiidae
ESV_428101	BOLD	94.9	GMPAW078-18	Animalia	Arthropoda	Insecta	Diptera	Cecidomyiidae
ESV_428105	BOLD	99.4	CRBLD28457-24	Animalia	Arthropoda	Insecta	Diptera	Cecidomyiidae
ESV_428105	BOLD	99.4	CRBLD29362-24	Animalia	Arthropoda	Insecta	Diptera	Cecidomyiidae
ESV_428105	BOLD	99.4	CRBLD29966-24	Animalia	Arthropoda	Insecta	Diptera	Cecidomyiidae
ESV_428105	BOLD	99.4	CRBLD30164-24	Animalia	Arthropoda	Insecta	Diptera	Cecidomyiidae
ESV_428105	BOLD	99.4	CRSRB6829-23	Animalia	Arthropoda	Insecta	Diptera	Cecidomyiidae
ESV_428105	BOLD	99.4	ONTB11082-23	Animalia	Arthropoda	Insecta	Diptera	Cecidomyiidae
ESV_428105	BOLD	99.4	ONTB20076-23	Animalia	Arthropoda	Insecta	Diptera	Cecidomyiidae
ESV_428105	BOLD	99.4	PLFDP491-20	Animalia	Arthropoda	Insecta	Diptera	Cecidomyiidae
ESV_428105	BOLD	99	CRBAA4559-22	Animalia	Arthropoda	Insecta	Diptera	Cecidomyiidae
ESV_428105	BOLD	99	CRBLA32892-22	Animalia	Arthropoda	Insecta	Diptera	Cecidomyiidae
ESV_428105	BOLD	99	CRBLC43706-22	Animalia	Arthropoda	Insecta	Diptera	Cecidomyiidae
ESV_428105	BOLD	99	CRSRA30239-22	Animalia	Arthropoda	Insecta	Diptera	Cecidomyiidae
ESV_428105	BOLD	99	PLXDP970-21	Animalia	Arthropoda	Insecta	Diptera	Cecidomyiidae
ESV_428105	BOLD	99	CRBOH17110-24	Animalia	Arthropoda	Insecta	Diptera	Cecidomyiidae
ESV_428105	BOLD	99	CRBTA32964-24	Animalia	Arthropoda	Insecta	Diptera	Cecidomyiidae
ESV_428105	BOLD	99	CRBTE5124-24	Animalia	Arthropoda	Insecta	Diptera	Cecidomyiidae
ESV_428105	BOLD	99	CRCBC50427-23	Animalia	Arthropoda	Insecta	Diptera	Cecidomyiidae
ESV_428105	BOLD	99	CRCED10157-23	Animalia	Arthropoda	Insecta	Diptera	Cecidomyiidae
ESV_428105	BOLD	99	CRKAT602-23	Animalia	Arthropoda	Insecta	Diptera	Cecidomyiidae
ESV_428105	BOLD	99	CRLDB14851-24	Animalia	Arthropoda	Insecta	Diptera	Cecidomyiidae
ESV_428105	BOLD	99	CRPTC18203-25	Animalia	Arthropoda	Insecta	Diptera	Cecidomyiidae
ESV_428105	BOLD	99	CRPTC9113-24	Animalia	Arthropoda	Insecta	Diptera	Cecidomyiidae
ESV_428105	BOLD	99	CRTOD17024-23	Animalia	Arthropoda	Insecta	Diptera	Cecidomyiidae
ESV_428105	BOLD	99	CRTOD5803-23	Animalia	Arthropoda	Insecta	Diptera	Cecidomyiidae
ESV_428105	BOLD	99	CRTRA19329-22	Animalia	Arthropoda	Insecta	Diptera	Cecidomyiidae
ESV_428105	BOLD	99	ONTA20006-23	Animalia	Arthropoda	Insecta	Diptera	Cecidomyiidae
ESV_428105	BOLD	99	ONTA34050-23	Animalia	Arthropoda	Insecta	Diptera	Cecidomyiidae
ESV_428105	BOLD	98.7	CRBAA35977-22	Animalia	Arthropoda	Insecta	Diptera	Cecidomyiidae
ESV_428105	BOLD	98.7	CRBAA46762-22	Animalia	Arthropoda	Insecta	Diptera	Cecidomyiidae
ESV_428105	BOLD	98.7	CRBAA46956-22	Animalia	Arthropoda	Insecta	Diptera	Cecidomyiidae
ESV_428105	BOLD	98.7	CRBAC7286-22	Animalia	Arthropoda	Insecta	Diptera	Cecidomyiidae
ESV_428105	BOLD	98.7	CRBAC18584-22	Animalia	Arthropoda	Insecta	Diptera	Cecidomyiidae
ESV_428105	BOLD	98.7	CRBLA39668-22	Animalia	Arthropoda	Insecta	Diptera	Cecidomyiidae
ESV_428105	BOLD	98.7	CRBLC23924-22	Animalia	Arthropoda	Insecta	Diptera	Cecidomyiidae
ESV_428105	BOLD	98.7	CRCEC60250-22	Animalia	Arthropoda	Insecta	Diptera	Cecidomyiidae
ESV_428105	BOLD	98.7	CROAE2531-22	Animalia	Arthropoda	Insecta	Diptera	Cecidomyiidae
ESV_428105	BOLD	98.7	CRBAA2012-22	Animalia	Arthropoda	Insecta	Diptera	Cecidomyiidae
ESV_428105	BOLD	98.7	CRBAA28686-22	Animalia	Arthropoda	Insecta	Diptera	Cecidomyiidae
ESV_428105	BOLD	98.7	CRCEC48010-22	Animalia	Arthropoda	Insecta	Diptera	Cecidomyiidae
ESV_428105	BOLD	98.7	CROAB19103-21	Animalia	Arthropoda	Insecta	Diptera	Cecidomyiidae
ESV_428105	BOLD	98.7	CROAB20912-21	Animalia	Arthropoda	Insecta	Diptera	Cecidomyiidae
ESV_428105	BOLD	98.7	CROAB22037-21	Animalia	Arthropoda	Insecta	Diptera	Cecidomyiidae
ESV_428105	BOLD	98.7	CROAB23179-21	Animalia	Arthropoda	Insecta	Diptera	Cecidomyiidae
ESV_428105	BOLD	98.7	CROAB35120-21	Animalia	Arthropoda	Insecta	Diptera	Cecidomyiidae
ESV_428105	BOLD	98.7	CROCA3743-21	Animalia	Arthropoda	Insecta	Diptera	Cecidomyiidae
ESV_428105	BOLD	98.7	CROCA6462-21	Animalia	Arthropoda	Insecta	Diptera	Cecidomyiidae
ESV_428105	BOLD	98.7	CROZA48285-21	Animalia	Arthropoda	Insecta	Diptera	Cecidomyiidae
ESV_428105	BOLD	98.7	CRTOA44410-22	Animalia	Arthropoda	Insecta	Diptera	Cecidomyiidae
ESV_428105	BOLD	98.7	CRTOB3073-22	Animalia	Arthropoda	Insecta	Diptera	Cecidomyiidae
ESV_428105	BOLD	98.7	CRTRB8379-22	Animalia	Arthropoda	Insecta	Diptera	Cecidomyiidae
ESV_428105	BOLD	98.4	CRBLA20821-22	Animalia	Arthropoda	Insecta	Diptera	Cecidomyiidae
ESV_428105	BOLD	98.4	CRBLC26381-22	Animalia	Arthropoda	Insecta	Diptera	Cecidomyiidae
ESV_428105	BOLD	98.4	CRSRA10412-22	Animalia	Arthropoda	Insecta	Diptera	Cecidomyiidae
ESV_428105	BOLD	98.4	CRBAA37961-22	Animalia	Arthropoda	Insecta	Diptera	Cecidomyiidae
ESV_428105	BOLD	98.4	CRBAC1336-22	Animalia	Arthropoda	Insecta	Diptera	Cecidomyiidae
ESV_428105	BOLD	98.4	CRBLA39744-22	Animalia	Arthropoda	Insecta	Diptera	Cecidomyiidae
ESV_428105	BOLD	98.4	CRBLB27269-22	Animalia	Arthropoda	Insecta	Diptera	Cecidomyiidae
ESV_428105	BOLD	98.4	CRBLB28372-22	Animalia	Arthropoda	Insecta	Diptera	Cecidomyiidae
ESV_428105	BOLD	98.4	CRBLC085-22	Animalia	Arthropoda	Insecta	Diptera	Cecidomyiidae
ESV_428105	BOLD	98.4	CRBLC10110-22	Animalia	Arthropoda	Insecta	Diptera	Cecidomyiidae
ESV_428105	BOLD	98.4	CRBOB1711-23	Animalia	Arthropoda	Insecta	Diptera	Cecidomyiidae
ESV_428105	BOLD	98.4	CRBOB10903-23	Animalia	Arthropoda	Insecta	Diptera	Cecidomyiidae
ESV_428105	BOLD	98.4	CRBOB7287-23	Animalia	Arthropoda	Insecta	Diptera	Cecidomyiidae
ESV_428105	BOLD	98.4	CRCEC49485-22	Animalia	Arthropoda	Insecta	Diptera	Cecidomyiidae
ESV_428105	BOLD	98.4	CRCEC51140-22	Animalia	Arthropoda	Insecta	Diptera	Cecidomyiidae
ESV_428105	BOLD	98.4	CROAC3886-21	Animalia	Arthropoda	Insecta	Diptera	Cecidomyiidae
ESV_428105	BOLD	98.4	CROAC7255-21	Animalia	Arthropoda	Insecta	Diptera	Cecidomyiidae
ESV_428105	BOLD	98.4	CROAC8650-21	Animalia	Arthropoda	Insecta	Diptera	Cecidomyiidae
ESV_428105	BOLD	98.4	CROAD13450-22	Animalia	Arthropoda	Insecta	Diptera	Cecidomyiidae
ESV_428105	BOLD	98.4	CROAD14343-22	Animalia	Arthropoda	Insecta	Diptera	Cecidomyiidae
ESV_428105	BOLD	98.4	CROAD14942-22	Animalia	Arthropoda	Insecta	Diptera	Cecidomyiidae
ESV_428105	BOLD	98.4	CROAD19126-22	Animalia	Arthropoda	Insecta	Diptera	Cecidomyiidae
ESV_428105	BOLD	98.4	CROAD21148-22	Animalia	Arthropoda	Insecta	Diptera	Cecidomyiidae
ESV_428105	BOLD	98.4	CROAD24089-22	Animalia	Arthropoda	Insecta	Diptera	Cecidomyiidae
ESV_428105	BOLD	98.4	CROAD38613-22	Animalia	Arthropoda	Insecta	Diptera	Cecidomyiidae
ESV_428105	BOLD	98.4	CROAD5948-22	Animalia	Arthropoda	Insecta	Diptera	Cecidomyiidae
ESV_428105	BOLD	98.4	CROAE5753-23	Animalia	Arthropoda	Insecta	Diptera	Cecidomyiidae
ESV_428105	BOLD	98.4	CROCA28109-21	Animalia	Arthropoda	Insecta	Diptera	Cecidomyiidae
ESV_428105	BOLD	98.4	CRTOA16172-21	Animalia	Arthropoda	Insecta	Diptera	Cecidomyiidae
ESV_428105	BOLD	98.4	CRTOA25465-21	Animalia	Arthropoda	Insecta	Diptera	Cecidomyiidae
ESV_428105	BOLD	98.4	CRTOB6871-22	Animalia	Arthropoda	Insecta	Diptera	Cecidomyiidae
ESV_428105	BOLD	98.4	CRTRA21313-22	Animalia	Arthropoda	Insecta	Diptera	Cecidomyiidae
ESV_428105	BOLD	98.4	CRTRA35652-22	Animalia	Arthropoda	Insecta	Diptera	Cecidomyiidae
ESV_428105	BOLD	98.4	CRTRA39736-22	Animalia	Arthropoda	Insecta	Diptera	Cecidomyiidae
ESV_428105	BOLD	98.4	CRTRA49277-22	Animalia	Arthropoda	Insecta	Diptera	Cecidomyiidae
ESV_428105	BOLD	98.4	CRTRA58009-22	Animalia	Arthropoda	Insecta	Diptera	Cecidomyiidae
ESV_428105	BOLD	98.4	CRTRB11102-22	Animalia	Arthropoda	Insecta	Diptera	Cecidomyiidae
ESV_428105	BOLD	98.4	CRTRB4869-22	Animalia	Arthropoda	Insecta	Diptera	Cecidomyiidae
ESV_428105	BOLD	98.4	CRTRB7082-22	Animalia	Arthropoda	Insecta	Diptera	Cecidomyiidae
ESV_428105	BOLD	98.4	CRTRB27480-22	Animalia	Arthropoda	Insecta	Diptera	Cecidomyiidae
ESV_428107	BOLD	99.4	GMPAN965-18	Animalia	Arthropoda	Insecta	Diptera	Cecidomyiidae
ESV_428108	BOLD	98.7	GMPAX418-18	Animalia	Arthropoda	Insecta	Diptera	Cecidomyiidae
ESV_428117	BOLD	98.1	CRSRA4024-22	Animalia	Arthropoda	Insecta	Diptera	Cecidomyiidae
ESV_428117	BOLD	97.8	CRBOB14473-23	Animalia	Arthropoda	Insecta	Diptera	Cecidomyiidae
ESV_428117	BOLD	97.8	CRBOB15664-23	Animalia	Arthropoda	Insecta	Diptera	Cecidomyiidae
ESV_428117	BOLD	97.8	CRBOB23757-23	Animalia	Arthropoda	Insecta	Diptera	Cecidomyiidae
ESV_428117	BOLD	97.8	CRBOF22359-24	Animalia	Arthropoda	Insecta	Diptera	Cecidomyiidae
ESV_428117	BOLD	97.8	CRBOF20263-24	Animalia	Arthropoda	Insecta	Diptera	Cecidomyiidae
ESV_428117	BOLD	97.8	CRBOF25274-24	Animalia	Arthropoda	Insecta	Diptera	Cecidomyiidae
ESV_428117	BOLD	97.8	CRBOF38952-24	Animalia	Arthropoda	Insecta	Diptera	Cecidomyiidae
ESV_428117	BOLD	97.8	CRBOF41824-24	Animalia	Arthropoda	Insecta	Diptera	Cecidomyiidae
ESV_428117	BOLD	97.8	CRBOF39712-24	Animalia	Arthropoda	Insecta	Diptera	Cecidomyiidae
ESV_428117	BOLD	97.8	CRBOG7596-23	Animalia	Arthropoda	Insecta	Diptera	Cecidomyiidae
ESV_428117	BOLD	97.8	CRBOH1062-24	Animalia	Arthropoda	Insecta	Diptera	Cecidomyiidae
ESV_428117	BOLD	97.8	CRBOH1112-24	Animalia	Arthropoda	Insecta	Diptera	Cecidomyiidae
ESV_428117	BOLD	97.8	CRBOH681-24	Animalia	Arthropoda	Insecta	Diptera	Cecidomyiidae
ESV_428117	BOLD	97.8	CRBOH931-24	Animalia	Arthropoda	Insecta	Diptera	Cecidomyiidae
ESV_428117	BOLD	97.8	CRBTA225-24	Animalia	Arthropoda	Insecta	Diptera	Cecidomyiidae
ESV_428117	BOLD	97.8	CRBTA19351-24	Animalia	Arthropoda	Insecta	Diptera	Cecidomyiidae
ESV_428117	BOLD	97.8	CRBTA19502-24	Animalia	Arthropoda	Insecta	Diptera	Cecidomyiidae
ESV_428117	BOLD	97.8	CRBTA19702-24	Animalia	Arthropoda	Insecta	Diptera	Cecidomyiidae
ESV_428117	BOLD	97.8	CRBTA19807-24	Animalia	Arthropoda	Insecta	Diptera	Cecidomyiidae
ESV_428117	BOLD	97.8	CRBTA19812-24	Animalia	Arthropoda	Insecta	Diptera	Cecidomyiidae
ESV_428117	BOLD	97.8	CRBTA33757-24	Animalia	Arthropoda	Insecta	Diptera	Cecidomyiidae
ESV_428117	BOLD	97.8	CRBTA25723-24	Animalia	Arthropoda	Insecta	Diptera	Cecidomyiidae
ESV_428117	BOLD	97.8	CRBTA25820-24	Animalia	Arthropoda	Insecta	Diptera	Cecidomyiidae
ESV_428117	BOLD	97.8	CRBTA26335-24	Animalia	Arthropoda	Insecta	Diptera	Cecidomyiidae
ESV_428117	BOLD	97.8	CRBTA26443-24	Animalia	Arthropoda	Insecta	Diptera	Cecidomyiidae
ESV_428117	BOLD	97.8	CRBTA29825-24	Animalia	Arthropoda	Insecta	Diptera	Cecidomyiidae
ESV_428117	BOLD	97.8	CRBTA6832-24	Animalia	Arthropoda	Insecta	Diptera	Cecidomyiidae
ESV_428117	BOLD	97.8	CRBTA8425-24	Animalia	Arthropoda	Insecta	Diptera	Cecidomyiidae
ESV_428117	BOLD	97.8	CRBTA9316-24	Animalia	Arthropoda	Insecta	Diptera	Cecidomyiidae
ESV_428117	BOLD	97.8	CRCBC33532-23	Animalia	Arthropoda	Insecta	Diptera	Cecidomyiidae
ESV_428117	BOLD	97.8	CRCBD20986-23	Animalia	Arthropoda	Insecta	Diptera	Cecidomyiidae
ESV_428117	BOLD	97.8	CRCCE1602-23	Animalia	Arthropoda	Insecta	Diptera	Cecidomyiidae
ESV_428117	BOLD	97.8	CRCCE1929-23	Animalia	Arthropoda	Insecta	Diptera	Cecidomyiidae
ESV_428117	BOLD	97.8	CRCEA27560-22	Animalia	Arthropoda	Insecta	Diptera	Cecidomyiidae
ESV_428117	BOLD	97.8	CRCEC32664-22	Animalia	Arthropoda	Insecta	Diptera	Cecidomyiidae
ESV_428117	BOLD	97.8	CRCEC34080-22	Animalia	Arthropoda	Insecta	Diptera	Cecidomyiidae
ESV_428117	BOLD	97.8	CRCED16235-23	Animalia	Arthropoda	Insecta	Diptera	Cecidomyiidae
ESV_428117	BOLD	97.8	CRPTA29265-24	Animalia	Arthropoda	Insecta	Diptera	Cecidomyiidae
ESV_428117	BOLD	97.8	CRPTD2950-25	Animalia	Arthropoda	Insecta	Diptera	Cecidomyiidae
ESV_428117	BOLD	97.8	ONTA14281-23	Animalia	Arthropoda	Insecta	Diptera	Cecidomyiidae
ESV_428117	BOLD	97.8	ONTA15123-23	Animalia	Arthropoda	Insecta	Diptera	Cecidomyiidae
ESV_428117	BOLD	97.8	ONTA16052-23	Animalia	Arthropoda	Insecta	Diptera	Cecidomyiidae
ESV_428117	BOLD	97.5	CRCEA2508-21	Animalia	Arthropoda	Insecta	Diptera	Cecidomyiidae
ESV_428117	BOLD	97.4	CRBOA10283-23	Animalia	Arthropoda	Insecta	Diptera	Cecidomyiidae
ESV_428117	BOLD	97.4	CRCEB11069-22	Animalia	Arthropoda	Insecta	Diptera	Cecidomyiidae
ESV_428117	BOLD	97.4	CRCEB20749-22	Animalia	Arthropoda	Insecta	Diptera	Cecidomyiidae
ESV_428117	BOLD	97.4	CRCEB23052-22	Animalia	Arthropoda	Insecta	Diptera	Cecidomyiidae
ESV_428117	BOLD	97.4	CRCEC36690-22	Animalia	Arthropoda	Insecta	Diptera	Cecidomyiidae
ESV_428117	BOLD	97.4	CRCEC39719-22	Animalia	Arthropoda	Insecta	Diptera	Cecidomyiidae
ESV_428117	BOLD	97.4	PLEDA2225-20	Animalia	Arthropoda	Insecta	Diptera	Cecidomyiidae
ESV_428117	BOLD	97.4	PLEDB121-20	Animalia	Arthropoda	Insecta	Diptera	Cecidomyiidae
ESV_428117	BOLD	97.4	PLEDI741-20	Animalia	Arthropoda	Insecta	Diptera	Cecidomyiidae
ESV_428117	BOLD	97.4	PLFBU294-19	Animalia	Arthropoda	Insecta	Diptera	Cecidomyiidae
ESV_428117	BOLD	97.4	PLFEG259-21	Animalia	Arthropoda	Insecta	Diptera	Cecidomyiidae
ESV_428117	BOLD	97.4	PLNDV538-20	Animalia	Arthropoda	Insecta	Diptera	Cecidomyiidae
ESV_428117	BOLD	97.4	PLPCA1742-20	Animalia	Arthropoda	Insecta	Diptera	Cecidomyiidae
ESV_428117	BOLD	97.4	CRBTA26076-24	Animalia	Arthropoda	Insecta	Diptera	Cecidomyiidae
ESV_428117	BOLD	97.4	CRLDD1363-24	Animalia	Arthropoda	Insecta	Diptera	Cecidomyiidae
ESV_428117	BOLD	97.4	CRTOD9317-23	Animalia	Arthropoda	Insecta	Diptera	Cecidomyiidae
ESV_428117	BOLD	97.1	CRBOA44794-23	Animalia	Arthropoda	Insecta	Diptera	Cecidomyiidae
ESV_428117	BOLD	97.1	CRCEA11307-21	Animalia	Arthropoda	Insecta	Diptera	Cecidomyiidae
ESV_428117	BOLD	97.1	CRCEA22973-22	Animalia	Arthropoda	Insecta	Diptera	Cecidomyiidae
ESV_428117	BOLD	97.1	CRCEA4728-21	Animalia	Arthropoda	Insecta	Diptera	Cecidomyiidae
ESV_428117	BOLD	97.1	CRCEA46726-22	Animalia	Arthropoda	Insecta	Diptera	Cecidomyiidae
ESV_428117	BOLD	97.1	CRCEA8042-21	Animalia	Arthropoda	Insecta	Diptera	Cecidomyiidae
ESV_428117	BOLD	97.1	CRCEA48229-22	Animalia	Arthropoda	Insecta	Diptera	Cecidomyiidae
ESV_428117	BOLD	97.1	CRCEA8922-21	Animalia	Arthropoda	Insecta	Diptera	Cecidomyiidae
ESV_428117	BOLD	97.1	CRCEB18032-22	Animalia	Arthropoda	Insecta	Diptera	Cecidomyiidae
ESV_428117	BOLD	97.1	CRCEB48487-22	Animalia	Arthropoda	Insecta	Diptera	Cecidomyiidae
ESV_428117	BOLD	97.1	CRCEC18923-22	Animalia	Arthropoda	Insecta	Diptera	Cecidomyiidae
ESV_428117	BOLD	97.1	CRCEC19339-22	Animalia	Arthropoda	Insecta	Diptera	Cecidomyiidae
ESV_428117	BOLD	97.1	CRCEC24055-22	Animalia	Arthropoda	Insecta	Diptera	Cecidomyiidae
ESV_428117	BOLD	97.1	CRCEC29715-22	Animalia	Arthropoda	Insecta	Diptera	Cecidomyiidae
ESV_428117	BOLD	97.1	CRCEC29797-22	Animalia	Arthropoda	Insecta	Diptera	Cecidomyiidae
ESV_428117	BOLD	97.1	PLEDB5956-20	Animalia	Arthropoda	Insecta	Diptera	Cecidomyiidae
ESV_428117	BOLD	97.1	PLPCE1223-20	Animalia	Arthropoda	Insecta	Diptera	Cecidomyiidae
ESV_428117	BOLD	97.1	CRBAC17159-22	Animalia	Arthropoda	Insecta	Diptera	Cecidomyiidae
ESV_428117	BOLD	97.1	CRCEC32260-22	Animalia	Arthropoda	Insecta	Trichoptera
ESV_428142	BOLD	97.1	GMARX32552-23	Animalia	Arthropoda	Insecta	Diptera	Cecidomyiidae
ESV_428142	BOLD	97.1	GMSPA15026-21	Animalia	Arthropoda	Insecta	Diptera	Cecidomyiidae
ESV_428142	BOLD	97.1	GMSPA28541-22	Animalia	Arthropoda	Insecta	Diptera	Cecidomyiidae
ESV_428142	BOLD	97.1	PERMM35489-23	Animalia	Arthropoda	Insecta	Diptera	Cecidomyiidae
ESV_428142	BOLD	96.8	GMSPB40138-23	Animalia	Arthropoda	Insecta	Diptera	Cecidomyiidae
ESV_428142	BOLD	96.8	GMAFO120-15	Animalia	Arthropoda	Insecta	Diptera	Cecidomyiidae
ESV_428142	BOLD	96.8	GMAFU689-15	Animalia	Arthropoda	Insecta	Diptera	Cecidomyiidae
ESV_428142	BOLD	96.8	LPGEN39342-24	Animalia	Arthropoda	Insecta	Diptera	Cecidomyiidae
ESV_428142	BOLD	96.5	GMSPB11847-23	Animalia	Arthropoda	Insecta	Diptera	Cecidomyiidae
ESV_428142	BOLD	96.5	CRBOA26521-23	Animalia	Arthropoda	Insecta	Diptera	Cecidomyiidae
ESV_428142	BOLD	96.5	CRBOA30814-23	Animalia	Arthropoda	Insecta	Diptera	Cecidomyiidae
ESV_428142	BOLD	96.5	CRBOE44079-23	Animalia	Arthropoda	Insecta	Diptera	Cecidomyiidae
ESV_428142	BOLD	96.5	CRBOH10209-24	Animalia	Arthropoda	Insecta	Diptera	Cecidomyiidae
ESV_428142	BOLD	96.5	CRPTB24384-25	Animalia	Arthropoda	Insecta	Diptera	Cecidomyiidae
ESV_428142	BOLD	96.5	CRPTC3396-24	Animalia	Arthropoda	Insecta	Diptera	Cecidomyiidae
ESV_428142	BOLD	96.5	GMAFA164-15	Animalia	Arthropoda	Insecta	Diptera	Cecidomyiidae
ESV_428142	BOLD	96.5	GMAFZ624-15	Animalia	Arthropoda	Insecta	Diptera	Cecidomyiidae
ESV_428142	BOLD	96.5	LPGEO23305-24	Animalia	Arthropoda	Insecta	Diptera	Cecidomyiidae
ESV_428142	BOLD	96.2	GMARX31801-23	Animalia	Arthropoda	Insecta	Diptera	Cecidomyiidae
ESV_428142	BOLD	96.2	CRBOB5379-23	Animalia	Arthropoda	Insecta	Diptera	Cecidomyiidae
ESV_428142	BOLD	96.2	PLAEB347-21	Animalia	Arthropoda	Insecta	Diptera	Cecidomyiidae
ESV_428142	BOLD	96.2	PLAFE1163-21	Animalia	Arthropoda	Insecta	Diptera	Cecidomyiidae
ESV_428142	BOLD	96.2	PLAFU248-21	Animalia	Arthropoda	Insecta	Diptera	Cecidomyiidae
ESV_428142	BOLD	96.2	PLRDY260-20	Animalia	Arthropoda	Insecta	Diptera	Cecidomyiidae
ESV_428142	BOLD	96.2	PLTDK204-20	Animalia	Arthropoda	Insecta	Diptera	Cecidomyiidae
ESV_428142	BOLD	96.2	CRBLA35803-22	Animalia	Arthropoda	Insecta	Diptera	Cecidomyiidae
ESV_428142	BOLD	96.2	CRBLD27375-24	Animalia	Arthropoda	Insecta	Diptera	Cecidomyiidae
ESV_428142	BOLD	96.2	CRBLD28002-24	Animalia	Arthropoda	Insecta	Diptera	Cecidomyiidae
ESV_428142	BOLD	96.2	CRBOE33308-23	Animalia	Arthropoda	Insecta	Diptera	Cecidomyiidae
ESV_428142	BOLD	96.2	CRBOF15191-24	Animalia	Arthropoda	Insecta	Diptera	Cecidomyiidae
ESV_428142	BOLD	96.2	CRBTA33767-24	Animalia	Arthropoda	Insecta	Diptera	Cecidomyiidae
ESV_428142	BOLD	96.2	CRBTA25252-24	Animalia	Arthropoda	Insecta	Diptera	Cecidomyiidae
ESV_428142	BOLD	96.2	CRSIC6171-23	Animalia	Arthropoda	Insecta	Diptera	Cecidomyiidae
ESV_428142	BOLD	96.2	GMAGV611-15	Animalia	Arthropoda	Insecta	Diptera	Cecidomyiidae
ESV_428142	BOLD	96.2	GMARR429-14	Animalia	Arthropoda	Insecta	Diptera	Cecidomyiidae
ESV_428142	BOLD	96.2	LPGEN47172-24	Animalia	Arthropoda	Insecta	Diptera	Cecidomyiidae
ESV_428142	BOLD	96.2	ONTB12922-23	Animalia	Arthropoda	Insecta	Diptera	Cecidomyiidae
ESV_428142	BOLD	96.2	ONTB36891-23	Animalia	Arthropoda	Insecta	Diptera	Cecidomyiidae
ESV_428142	BOLD	96.2	ONTB44498-23	Animalia	Arthropoda	Insecta	Diptera	Cecidomyiidae
ESV_428147	BOLD	96.5	CRSRD18456-24	Animalia	Arthropoda	Insecta	Diptera	Cecidomyiidae
ESV_428147	BOLD	96.2	GMPAW193-18	Animalia	Arthropoda	Insecta	Diptera	Cecidomyiidae
ESV_428147	BOLD	95.8	GMPAW078-18	Animalia	Arthropoda	Insecta	Diptera	Cecidomyiidae
ESV_428172	BOLD	98.7	GMPAX132-18	Animalia	Arthropoda	Insecta	Diptera	Cecidomyiidae
ESV_428173	BOLD	98.7	CRBOB28696-23	Animalia	Arthropoda	Insecta	Diptera	Cecidomyiidae
ESV_428173	BOLD	98.7	CRSGD13097-24	Animalia	Arthropoda	Insecta	Diptera	Cecidomyiidae
ESV_428173	BOLD	98.7	CRSGD13220-24	Animalia	Arthropoda	Insecta	Diptera	Cecidomyiidae
ESV_428173	BOLD	98.4	CRSGB7115-23	Animalia	Arthropoda	Insecta	Diptera	Cecidomyiidae
ESV_428173	BOLD	98.4	CRSGB7836-23	Animalia	Arthropoda	Insecta	Diptera	Cecidomyiidae
ESV_428173	BOLD	97.8	CRTOA29168-21	Animalia	Arthropoda	Insecta	Diptera	Cecidomyiidae
ESV_428173	BOLD	97.8	CRBAC10872-22	Animalia	Arthropoda	Insecta	Diptera	Cecidomyiidae
ESV_428173	BOLD	97.8	CRSIA17066-22	Animalia	Arthropoda	Insecta	Diptera	Cecidomyiidae
ESV_428173	BOLD	97.8	CROCA6111-21	Animalia	Arthropoda	Insecta	Diptera	Cecidomyiidae
ESV_428180	BOLD	96.2	CRSIC6826-23	Animalia	Arthropoda	Insecta	Diptera	Cecidomyiidae
ESV_428180	BOLD	96.2	CRSIC9454-23	Animalia	Arthropoda	Insecta	Diptera	Cecidomyiidae
ESV_428180	BOLD	96.2	CRSRD10358-23	Animalia	Arthropoda	Insecta	Diptera	Cecidomyiidae
ESV_428180	BOLD	96.2	CRSRD11220-23	Animalia	Arthropoda	Insecta	Diptera	Cecidomyiidae
ESV_428180	BOLD	96.2	CRSRD11168-23	Animalia	Arthropoda	Insecta	Diptera	Cecidomyiidae
ESV_428180	BOLD	96.2	CRSRD11271-23	Animalia	Arthropoda	Insecta	Diptera	Cecidomyiidae
ESV_428180	BOLD	96.2	CRSRD11375-23	Animalia	Arthropoda	Insecta	Diptera	Cecidomyiidae
ESV_428180	BOLD	96.2	CRSRD11541-23	Animalia	Arthropoda	Insecta	Diptera	Cecidomyiidae
ESV_428180	BOLD	96.2	CRSRD16046-24	Animalia	Arthropoda	Insecta	Diptera	Cecidomyiidae
ESV_428180	BOLD	96.2	CRSRD16116-24	Animalia	Arthropoda	Insecta	Diptera	Cecidomyiidae
ESV_428180	BOLD	96.2	CRSRD16763-24	Animalia	Arthropoda	Insecta	Diptera	Cecidomyiidae
ESV_428180	BOLD	96.2	CRSRD16747-24	Animalia	Arthropoda	Insecta	Diptera	Cecidomyiidae
ESV_428180	BOLD	96.2	CRSRD16834-24	Animalia	Arthropoda	Insecta	Diptera	Cecidomyiidae
ESV_428180	BOLD	96.2	CRSRD16821-24	Animalia	Arthropoda	Insecta	Diptera	Cecidomyiidae
ESV_428180	BOLD	96.2	CRSRD16899-24	Animalia	Arthropoda	Insecta	Diptera	Cecidomyiidae
ESV_428180	BOLD	96.2	CRSRD16900-24	Animalia	Arthropoda	Insecta	Diptera	Cecidomyiidae
ESV_428180	BOLD	96.2	CRSRD17099-24	Animalia	Arthropoda	Insecta	Diptera	Cecidomyiidae
ESV_428180	BOLD	96.2	CRSRD17112-24	Animalia	Arthropoda	Insecta	Diptera	Cecidomyiidae
ESV_428180	BOLD	96.2	CRSRD18184-24	Animalia	Arthropoda	Insecta	Diptera	Cecidomyiidae
ESV_428180	BOLD	96.2	CRSRD18249-24	Animalia	Arthropoda	Insecta	Diptera	Cecidomyiidae
ESV_428180	BOLD	96.2	CRSRD18349-24	Animalia	Arthropoda	Insecta	Diptera	Cecidomyiidae
ESV_428180	BOLD	96.2	CRSRD18661-24	Animalia	Arthropoda	Insecta	Diptera	Cecidomyiidae
ESV_428180	BOLD	96.2	CRSRD19372-24	Animalia	Arthropoda	Insecta	Diptera	Cecidomyiidae
ESV_428180	BOLD	96.2	CRSRD20184-24	Animalia	Arthropoda	Insecta	Diptera	Cecidomyiidae
ESV_428180	BOLD	96.2	CRSRD22102-24	Animalia	Arthropoda	Insecta	Diptera	Cecidomyiidae
ESV_428180	BOLD	96.2	CRSRD2381-23	Animalia	Arthropoda	Insecta	Diptera	Cecidomyiidae
ESV_428180	BOLD	96.2	CRSRD2545-23	Animalia	Arthropoda	Insecta	Diptera	Cecidomyiidae
ESV_428180	BOLD	96.2	CRSRD2570-23	Animalia	Arthropoda	Insecta	Diptera	Cecidomyiidae
ESV_428180	BOLD	96.2	CRSRD2580-23	Animalia	Arthropoda	Insecta	Diptera	Cecidomyiidae
ESV_428180	BOLD	96.2	CRSRD2768-23	Animalia	Arthropoda	Insecta	Diptera	Cecidomyiidae
ESV_428180	BOLD	96.2	CRSRD2645-23	Animalia	Arthropoda	Insecta	Diptera	Cecidomyiidae
ESV_428180	BOLD	96.2	CRSRD2947-23	Animalia	Arthropoda	Insecta	Diptera	Cecidomyiidae
ESV_428180	BOLD	96.2	CRSRD3996-23	Animalia	Arthropoda	Insecta	Diptera	Cecidomyiidae
ESV_428180	BOLD	96.2	CRSRD4372-23	Animalia	Arthropoda	Insecta	Diptera	Cecidomyiidae
ESV_428180	BOLD	96.2	CRSRD4375-23	Animalia	Arthropoda	Insecta	Diptera	Cecidomyiidae
ESV_428180	BOLD	96.2	CRSRD878-23	Animalia	Arthropoda	Insecta	Diptera	Cecidomyiidae
ESV_428180	BOLD	95.9	CRTOB41038-22	Animalia	Arthropoda	Insecta	Diptera	Cecidomyiidae
ESV_428180	BOLD	95.8	GMPAM046-18	Animalia	Arthropoda	Insecta	Diptera	Cecidomyiidae
ESV_428180	BOLD	95.8	GMPAM809-18	Animalia	Arthropoda	Insecta	Diptera	Cecidomyiidae
ESV_428180	BOLD	95.8	CROCB5411-22	Animalia	Arthropoda	Insecta	Diptera	Cecidomyiidae
ESV_428180	BOLD	95.8	CROZA21400-21	Animalia	Arthropoda	Insecta	Diptera	Cecidomyiidae
ESV_428180	BOLD	95.8	CROZA31923-21	Animalia	Arthropoda	Insecta	Diptera	Cecidomyiidae
ESV_428180	BOLD	95.8	CRSIA26425-22	Animalia	Arthropoda	Insecta	Diptera	Cecidomyiidae
ESV_428180	BOLD	95.8	CRSIA41241-22	Animalia	Arthropoda	Insecta	Diptera	Cecidomyiidae
ESV_428180	BOLD	95.8	CRSRA24346-22	Animalia	Arthropoda	Insecta	Diptera	Cecidomyiidae
ESV_428180	BOLD	95.8	CRSRA24711-22	Animalia	Arthropoda	Insecta	Diptera	Cecidomyiidae
ESV_428180	BOLD	95.8	CRSRA30865-22	Animalia	Arthropoda	Insecta	Diptera	Cecidomyiidae
ESV_428180	BOLD	95.8	CRSRA30987-22	Animalia	Arthropoda	Insecta	Diptera	Cecidomyiidae
ESV_428180	BOLD	95.8	CRSRA31285-22	Animalia	Arthropoda	Insecta	Diptera	Cecidomyiidae
ESV_428180	BOLD	95.8	CRSRA31427-22	Animalia	Arthropoda	Insecta	Diptera	Cecidomyiidae
ESV_428180	BOLD	95.8	CRSRA34741-22	Animalia	Arthropoda	Insecta	Diptera	Cecidomyiidae
ESV_428180	BOLD	95.8	CRSRA4877-22	Animalia	Arthropoda	Insecta	Diptera	Cecidomyiidae
ESV_428180	BOLD	95.8	CRSRA7777-22	Animalia	Arthropoda	Insecta	Diptera	Cecidomyiidae
ESV_428180	BOLD	95.8	CRSRD16156-24	Animalia	Arthropoda	Insecta	Diptera	Cecidomyiidae
ESV_428180	BOLD	95.8	CRSRD16924-24	Animalia	Arthropoda	Insecta	Diptera	Cecidomyiidae
ESV_428180	BOLD	95.8	CRSRD18517-24	Animalia	Arthropoda	Insecta	Diptera	Cecidomyiidae
ESV_428180	BOLD	95.8	CRSRD4308-23	Animalia	Arthropoda	Insecta	Diptera	Cecidomyiidae
ESV_428180	BOLD	95.5	GMPPA304-18	Animalia	Arthropoda	Insecta	Diptera	Cecidomyiidae
ESV_428180	BOLD	95.5	CRBLC869-22	Animalia	Arthropoda	Insecta	Diptera	Cecidomyiidae
ESV_428180	BOLD	95.5	CROAE12812-23	Animalia	Arthropoda	Insecta	Diptera	Cecidomyiidae
ESV_428180	BOLD	95.5	CROCA13348-21	Animalia	Arthropoda	Insecta	Diptera	Cecidomyiidae
ESV_428180	BOLD	95.5	CROCA14844-21	Animalia	Arthropoda	Insecta	Diptera	Cecidomyiidae
ESV_428180	BOLD	95.5	CROCA8147-21	Animalia	Arthropoda	Insecta	Diptera	Cecidomyiidae
ESV_428180	BOLD	95.5	CROCA8932-21	Animalia	Arthropoda	Insecta	Diptera	Cecidomyiidae
ESV_428180	BOLD	95.5	CROCA8971-21	Animalia	Arthropoda	Insecta	Diptera	Cecidomyiidae
ESV_428180	BOLD	95.5	CROCA9086-21	Animalia	Arthropoda	Insecta	Diptera	Cecidomyiidae
ESV_428180	BOLD	95.5	CRSIA28359-22	Animalia	Arthropoda	Insecta	Diptera	Cecidomyiidae
ESV_428180	BOLD	95.5	CRSIA30940-22	Animalia	Arthropoda	Insecta	Diptera	Cecidomyiidae
ESV_428180	BOLD	95.5	CRSIA4460-21	Animalia	Arthropoda	Insecta	Diptera	Cecidomyiidae
ESV_428180	BOLD	95.5	CRSIA5259-21	Animalia	Arthropoda	Insecta	Diptera	Cecidomyiidae
ESV_428180	BOLD	95.5	CRSIA48165-22	Animalia	Arthropoda	Insecta	Diptera	Cecidomyiidae
ESV_428180	BOLD	95.5	CRSRA37261-22	Animalia	Arthropoda	Insecta	Diptera	Cecidomyiidae
ESV_428180	BOLD	95.5	CRSRA37427-22	Animalia	Arthropoda	Insecta	Diptera	Cecidomyiidae
ESV_428180	BOLD	95.5	CRSRA38622-22	Animalia	Arthropoda	Insecta	Diptera	Cecidomyiidae
ESV_428180	BOLD	95.5	CRTOB13141-22	Animalia	Arthropoda	Insecta	Diptera	Cecidomyiidae
ESV_428180	BOLD	95.5	CRTOC4062-22	Animalia	Arthropoda	Insecta	Diptera	Cecidomyiidae
ESV_428180	BOLD	95.5	CRSIA26290-22	Animalia	Arthropoda	Insecta	Diptera	Cecidomyiidae
ESV_428180	BOLD	95.5	CRSRA10288-22	Animalia	Arthropoda	Insecta	Diptera	Cecidomyiidae
ESV_428180	BOLD	95.5	CRSRA31405-22	Animalia	Arthropoda	Insecta	Diptera	Cecidomyiidae
ESV_428180	BOLD	95.5	CRSRD3948-23	Animalia	Arthropoda	Insecta	Diptera	Cecidomyiidae
ESV_428180	BOLD	95.2	CRHTA33044-22	Animalia	Arthropoda	Insecta	Diptera	Cecidomyiidae
ESV_428180	BOLD	95.2	CROCA8961-21	Animalia	Arthropoda	Insecta	Diptera	Cecidomyiidae
ESV_428180	BOLD	95.2	CRSIA10823-21	Animalia	Arthropoda	Insecta	Diptera	Cecidomyiidae
ESV_428180	BOLD	95.2	CRSIA3094-21	Animalia	Arthropoda	Insecta	Diptera	Cecidomyiidae
ESV_428180	BOLD	95.2	CRSIA3744-21	Animalia	Arthropoda	Insecta	Diptera	Cecidomyiidae
ESV_428180	BOLD	95.2	CRSIA4516-21	Animalia	Arthropoda	Insecta	Diptera	Cecidomyiidae
ESV_428180	BOLD	95.2	CRSIA4831-21	Animalia	Arthropoda	Insecta	Diptera	Cecidomyiidae
ESV_428180	BOLD	95.2	CRSIA5509-21	Animalia	Arthropoda	Insecta	Diptera	Cecidomyiidae
ESV_428180	BOLD	95.2	CRSRA43618-22	Animalia	Arthropoda	Insecta	Diptera	Cecidomyiidae
ESV_428180	BOLD	95.2	CRSRA44703-22	Animalia	Arthropoda	Insecta	Diptera	Cecidomyiidae
ESV_428180	BOLD	95.2	CRTRA21882-22	Animalia	Arthropoda	Insecta	Diptera	Cecidomyiidae
ESV_428180	BOLD	95.2	CROCA13208-21	Animalia	Arthropoda	Insecta	Diptera	Cecidomyiidae
ESV_428180	BOLD	95.2	CROCB6141-22	Animalia	Arthropoda	Insecta	Diptera	Cecidomyiidae
ESV_428180	BOLD	95.2	CRTRA3553-22	Animalia	Arthropoda	Insecta	Diptera	Cecidomyiidae
ESV_428180	BOLD	95.2	CRCBC19062-23	Animalia	Arthropoda	Insecta	Diptera	Cecidomyiidae
ESV_428189	BOLD	86.8	PLPCY800-20	Animalia	Arthropoda	Insecta	Thysanoptera	Thripidae	Scirtothrips
ESV_428189	BOLD	86.8	CRMNE1488-24	Animalia	Arthropoda	Insecta	Thysanoptera	Thripidae
ESV_428189	BOLD	86.8	CRMNB7272-24	Animalia	Arthropoda	Insecta	Thysanoptera	Thripidae
ESV_428189	BOLD	86.5	PLDAY367-19	Animalia	Arthropoda	Insecta	Thysanoptera	Thripidae	Scirtothrips
ESV_428189	BOLD	86.5	PLEAW559-19	Animalia	Arthropoda	Insecta	Thysanoptera	Thripidae	Scirtothrips
ESV_428189	BOLD	86.5	PLFCR720-20	Animalia	Arthropoda	Insecta	Thysanoptera	Thripidae	Scirtothrips
ESV_428189	BOLD	86.5	PLFCY1024-20	Animalia	Arthropoda	Insecta	Thysanoptera	Thripidae	Scirtothrips
ESV_428189	BOLD	86.5	PLGCR310-20	Animalia	Arthropoda	Insecta	Thysanoptera	Thripidae	Scirtothrips
ESV_428189	BOLD	86.5	PLZCJ026-20	Animalia	Arthropoda	Insecta	Thysanoptera	Thripidae	Scirtothrips
ESV_428189	BOLD	86.5	CRLSB23125-24	Animalia	Arthropoda	Insecta	Thysanoptera	Thripidae	Scirtothrips
ESV_428189	BOLD	86.5	CRLSB30676-24	Animalia	Arthropoda	Insecta	Thysanoptera	Thripidae	Scirtothrips
ESV_428189	BOLD	86.5	CRQUC11537-23	Animalia	Arthropoda	Insecta	Thysanoptera	Thripidae	Scirtothrips
ESV_428189	BOLD	86.5	PLGAQ104-19	Animalia	Arthropoda	Insecta	Thysanoptera	Thripidae	Scirtothrips
ESV_428189	BOLD	86.5	PLXCM1192-20	Animalia	Arthropoda	Insecta	Thysanoptera	Thripidae	Scirtothrips
ESV_428189	BOLD	86.5	PLZAS398-20	Animalia	Arthropoda	Insecta	Thysanoptera	Thripidae	Scirtothrips
ESV_428189	BOLD	86.5	CRLSB5158-24	Animalia	Arthropoda	Insecta	Thysanoptera	Thripidae
ESV_428189	BOLD	86.5	CRLSB6593-24	Animalia	Arthropoda	Insecta	Thysanoptera	Thripidae
ESV_428189	BOLD	86.5	CRMNB7167-24	Animalia	Arthropoda	Insecta	Thysanoptera	Thripidae
ESV_428189	BOLD	86.5	CRMNB7179-24	Animalia	Arthropoda	Insecta	Thysanoptera	Thripidae
ESV_428189	BOLD	86.5	CRMND783-24	Animalia	Arthropoda	Insecta	Thysanoptera	Thripidae
ESV_428189	BOLD	86.5	CRMNB7197-24	Animalia	Arthropoda	Insecta	Thysanoptera	Thripidae
ESV_428189	BOLD	86.5	CRMND233-24	Animalia	Arthropoda	Insecta	Thysanoptera	Thripidae
ESV_428189	BOLD	86.5	CRMND295-24	Animalia	Arthropoda	Insecta	Thysanoptera	Thripidae
ESV_428189	BOLD	86.5	CRMND818-24	Animalia	Arthropoda	Insecta	Thysanoptera	Thripidae
ESV_428189	BOLD	86.5	CRMND974-24	Animalia	Arthropoda	Insecta	Thysanoptera	Thripidae
ESV_428189	BOLD	86.5	CRMNB7231-24	Animalia	Arthropoda	Insecta	Thysanoptera	Thripidae
ESV_428189	BOLD	86.5	CRMNF2315-24	Animalia	Arthropoda	Insecta	Thysanoptera	Thripidae
ESV_428189	BOLD	86.5	CRSRC17228-24	Animalia	Arthropoda	Insecta	Thysanoptera	Thripidae
ESV_428189	BOLD	86.5	GMSCK1286-23	Animalia	Arthropoda	Insecta	Thysanoptera
ESV_428189	BOLD	86.1	PLFAR583-19	Animalia	Arthropoda	Insecta	Thysanoptera	Thripidae	Scirtothrips
ESV_428189	BOLD	86.1	PLKCM392-20	Animalia	Arthropoda	Insecta	Thysanoptera	Thripidae	Scirtothrips
ESV_428189	BOLD	86.1	PLDAW298-19	Animalia	Arthropoda	Insecta	Thysanoptera	Thripidae	Scirtothrips
ESV_428189	BOLD	86.1	PLDCU320-20	Animalia	Arthropoda	Insecta	Thysanoptera	Thripidae	Scirtothrips
ESV_428189	BOLD	86.1	PLDCV392-20	Animalia	Arthropoda	Insecta	Thysanoptera	Thripidae	Scirtothrips
ESV_428189	BOLD	86.1	PLFAK464-19	Animalia	Arthropoda	Insecta	Thysanoptera	Thripidae	Scirtothrips
ESV_428189	BOLD	86.1	PLUAS601-20	Animalia	Arthropoda	Insecta	Thysanoptera	Thripidae	Scirtothrips
ESV_428189	BOLD	86.1	CRKAS25734-23	Animalia	Arthropoda	Insecta	Thysanoptera	Thripidae	Scirtothrips
ESV_428189	BOLD	86.1	CRQUB30271-22	Animalia	Arthropoda	Insecta	Thysanoptera	Thripidae	Scirtothrips
ESV_428189	BOLD	86.1	PLACW279-20	Animalia	Arthropoda	Insecta	Thysanoptera	Thripidae	Scirtothrips
ESV_428189	BOLD	86.1	PLECQ1342-20	Animalia	Arthropoda	Insecta	Thysanoptera	Thripidae	Scirtothrips
ESV_428189	BOLD	86.1	PLECQ1352-20	Animalia	Arthropoda	Insecta	Thysanoptera	Thripidae	Scirtothrips
ESV_428189	BOLD	86.1	PLECS943-20	Animalia	Arthropoda	Insecta	Thysanoptera	Thripidae	Scirtothrips
ESV_428189	BOLD	86.1	PLECS947-20	Animalia	Arthropoda	Insecta	Thysanoptera	Thripidae	Scirtothrips
ESV_428189	BOLD	86.1	PLECW451-20	Animalia	Arthropoda	Insecta	Thysanoptera	Thripidae	Scirtothrips
ESV_428189	BOLD	86.1	GMSCK1281-23	Animalia	Arthropoda	Insecta	Thysanoptera
ESV_428189	BOLD	86.1	GMSCK1287-23	Animalia	Arthropoda	Insecta	Thysanoptera
ESV_428189	BOLD	86.1	GMSCK1292-23	Animalia	Arthropoda	Insecta	Thysanoptera
ESV_428189	BOLD	86.1	GMSCK3989-23	Animalia	Arthropoda	Insecta	Thysanoptera
ESV_428189	BOLD	86.1	GMSCK5031-23	Animalia	Arthropoda	Insecta	Thysanoptera
ESV_428189	BOLD	86.1	GMSCK14515-23	Animalia	Arthropoda	Insecta	Thysanoptera
ESV_428189	BOLD	86.1	GMSCK14626-23	Animalia	Arthropoda	Insecta	Thysanoptera
ESV_428189	BOLD	86.1	GMSVC6839-23	Animalia	Arthropoda	Insecta	Thysanoptera
ESV_428189	BOLD	85.9	PLHCW246-20	Animalia	Arthropoda	Insecta	Thysanoptera
ESV_428189	BOLD	85.8	JINII2992-20	Animalia	Arthropoda	Insecta	Thysanoptera	Thripidae	Scirtothrips
ESV_428189	BOLD	85.8	JINII731-20	Animalia	Arthropoda	Insecta	Thysanoptera	Thripidae	Scirtothrips
ESV_428189	BOLD	85.8	PLAFD1230-21	Animalia	Arthropoda	Insecta	Thysanoptera	Thripidae	Scirtothrips
ESV_428189	BOLD	85.8	PLECQ1360-20	Animalia	Arthropoda	Insecta	Thysanoptera	Thripidae	Scirtothrips
ESV_428189	BOLD	85.8	PLECR1883-20	Animalia	Arthropoda	Insecta	Thysanoptera	Thripidae	Scirtothrips
ESV_428189	BOLD	85.8	PLECN2154-20	Animalia	Arthropoda	Insecta	Thysanoptera	Thripidae	Scirtothrips
ESV_428189	BOLD	85.8	PLECW1145-20	Animalia	Arthropoda	Insecta	Thysanoptera	Thripidae	Scirtothrips
ESV_428189	BOLD	85.8	PLGAR106-19	Animalia	Arthropoda	Insecta	Thysanoptera	Thripidae	Scirtothrips
ESV_428189	BOLD	85.8	PLPCT523-20	Animalia	Arthropoda	Insecta	Thysanoptera	Thripidae	Scirtothrips
ESV_428189	BOLD	85.8	PLAAP491-18	Animalia	Arthropoda	Insecta	Hemiptera
ESV_428189	BOLD	85.8	GMSCK1277-23	Animalia	Arthropoda	Insecta	Thysanoptera
ESV_428189	BOLD	85.8	GMSCK1291-23	Animalia	Arthropoda	Insecta	Thysanoptera
ESV_428189	BOLD	85.8	GMSCK14500-23	Animalia	Arthropoda	Insecta	Thysanoptera
ESV_428198	BOLD	98.1	CRSIA40618-22	Animalia	Arthropoda	Insecta	Diptera	Cecidomyiidae
ESV_428198	BOLD	97.4	CRSRA33975-22	Animalia	Arthropoda	Insecta	Diptera	Cecidomyiidae
ESV_428198	BOLD	97.4	CROCA116-21	Animalia	Arthropoda	Insecta	Diptera	Cecidomyiidae
ESV_428198	BOLD	97.1	LNAUV1005-17	Animalia	Arthropoda	Insecta	Lepidoptera	Nepticulidae	Muhabbetana	Muhabbetana royenicola
ESV_428198	BOLD	97.1	CROCA12358-21	Animalia	Arthropoda	Insecta	Diptera	Cecidomyiidae
ESV_428198	BOLD	97.1	CROCA37446-21	Animalia	Arthropoda	Insecta	Diptera	Cecidomyiidae
ESV_428198	BOLD	97.1	CROCA37447-21	Animalia	Arthropoda	Insecta	Diptera	Cecidomyiidae
ESV_428198	BOLD	97.1	CROCA37479-21	Animalia	Arthropoda	Insecta	Diptera	Cecidomyiidae
ESV_428198	BOLD	97.1	CROCA37359-21	Animalia	Arthropoda	Insecta	Diptera	Cecidomyiidae
ESV_428198	BOLD	97.1	CROCA37435-21	Animalia	Arthropoda	Insecta	Diptera	Cecidomyiidae
ESV_428198	BOLD	97.1	CROCB6392-23	Animalia	Arthropoda	Insecta	Diptera	Cecidomyiidae
ESV_428229	BOLD	91.1	GBAAY86965-24	Animalia	Chordata	Mammalia	Carnivora	Procyonidae	Nasua	Nasua narica
ESV_428236	BOLD	98.4	GMCED19012-21	Animalia	Arthropoda	Insecta	Diptera	Cecidomyiidae
ESV_428240	BOLD	86.6	LNAUV1685-17	Animalia	Arthropoda	Insecta	Lepidoptera	Bucculatricidae	Bucculatrix	Bucculatrix cordiaella
ESV_428240	BOLD	85.6	LNAUY2424-19	Animalia	Arthropoda	Insecta	Lepidoptera	Sesiidae	Paranthrene	Paranthrene asilipennis
ESV_428274	BOLD	100	CROAB4218-21	Animalia	Arthropoda	Insecta	Diptera	Cecidomyiidae
ESV_428274	BOLD	100	CROAB51187-21	Animalia	Arthropoda	Insecta	Diptera	Cecidomyiidae
ESV_428274	BOLD	100	CRSRD12052-23	Animalia	Arthropoda	Insecta	Diptera	Cecidomyiidae
ESV_428274	BOLD	100	CRSRD20130-24	Animalia	Arthropoda	Insecta	Diptera	Cecidomyiidae
ESV_428274	BOLD	100	CRSRD21831-24	Animalia	Arthropoda	Insecta	Diptera	Cecidomyiidae
ESV_428274	BOLD	100	CRSRD3248-23	Animalia	Arthropoda	Insecta	Diptera	Cecidomyiidae
ESV_428274	BOLD	100	CRSRD5108-23	Animalia	Arthropoda	Insecta	Diptera	Cecidomyiidae
ESV_428274	BOLD	100	CRSRD6106-23	Animalia	Arthropoda	Insecta	Diptera	Cecidomyiidae
ESV_428274	BOLD	100	CRSRD6107-23	Animalia	Arthropoda	Insecta	Diptera	Cecidomyiidae
ESV_428274	BOLD	100	CRSRD6691-23	Animalia	Arthropoda	Insecta	Diptera	Cecidomyiidae
ESV_428274	BOLD	100	CRSRD23338-24	Animalia	Arthropoda	Insecta	Diptera	Cecidomyiidae
ESV_428274	BOLD	100	CRSRD23614-24	Animalia	Arthropoda	Insecta	Diptera	Cecidomyiidae
ESV_428274	BOLD	100	CRSRD24610-24	Animalia	Arthropoda	Insecta	Diptera	Cecidomyiidae
ESV_428274	BOLD	100	CRSRD24764-24	Animalia	Arthropoda	Insecta	Diptera	Cecidomyiidae
ESV_428274	BOLD	100	CRSRD25689-24	Animalia	Arthropoda	Insecta	Diptera	Cecidomyiidae
ESV_428274	BOLD	100	CRSRD25634-24	Animalia	Arthropoda	Insecta	Diptera	Cecidomyiidae
ESV_428274	BOLD	100	CRSRD25678-24	Animalia	Arthropoda	Insecta	Diptera	Cecidomyiidae
ESV_428274	BOLD	100	CRSRD25834-24	Animalia	Arthropoda	Insecta	Diptera	Cecidomyiidae
ESV_428274	BOLD	100	ONTA24055-23	Animalia	Arthropoda	Insecta	Diptera	Cecidomyiidae
ESV_428274	BOLD	100	ONTA47951-23	Animalia	Arthropoda	Insecta	Diptera	Cecidomyiidae
ESV_428296	BOLD	100	CRLDC35806-24	Animalia	Arthropoda	Insecta	Diptera	Cecidomyiidae
ESV_428297	BOLD	94.9	CRSRD18456-24	Animalia	Arthropoda	Insecta	Diptera	Cecidomyiidae
ESV_428297	BOLD	94.6	GMPAW193-18	Animalia	Arthropoda	Insecta	Diptera	Cecidomyiidae
ESV_428297	BOLD	94.2	GMPAW078-18	Animalia	Arthropoda	Insecta	Diptera	Cecidomyiidae
ESV_428297	BOLD	93.9	LPGEO22649-24	Animalia	Arthropoda	Insecta	Diptera	Cecidomyiidae
ESV_428298	BOLD	100	LPGEO25924-24	Animalia	Arthropoda	Insecta	Diptera	Cecidomyiidae
ESV_428301	BOLD	95.2	AGAKS1855-17	Animalia	Arthropoda	Insecta	Diptera	Cecidomyiidae
ESV_428301	BOLD	94.2	GMAGA485-15	Animalia	Arthropoda	Insecta	Diptera	Cecidomyiidae
ESV_428301	BOLD	94.2	GMAGD2109-15	Animalia	Arthropoda	Insecta	Diptera	Cecidomyiidae
ESV_428301	BOLD	94.2	GMARE495-14	Animalia	Arthropoda	Insecta	Diptera	Cecidomyiidae
ESV_428301	BOLD	94.2	TRIHM16892-22	Animalia	Arthropoda	Insecta	Diptera	Cecidomyiidae
ESV_428303	BOLD	99.7	CROAD39171-22	Animalia	Arthropoda	Insecta	Diptera	Cecidomyiidae
ESV_428303	BOLD	99.7	CRSRD21791-24	Animalia	Arthropoda	Insecta	Diptera	Cecidomyiidae
ESV_428303	BOLD	99.4	CROCB600-22	Animalia	Arthropoda	Insecta	Diptera	Cecidomyiidae
ESV_428303	BOLD	99	CROCA548-21	Animalia	Arthropoda	Insecta	Diptera	Cecidomyiidae
ESV_428303	BOLD	99	CROCA5968-21	Animalia	Arthropoda	Insecta	Diptera	Cecidomyiidae
ESV_428303	BOLD	99	CROCA35853-21	Animalia	Arthropoda	Insecta	Diptera	Cecidomyiidae
ESV_428303	BOLD	99	CRSRA7923-22	Animalia	Arthropoda	Insecta	Diptera	Cecidomyiidae
ESV_428303	BOLD	98.7	CROAB10033-21	Animalia	Arthropoda	Insecta	Diptera	Cecidomyiidae
ESV_428303	BOLD	98.7	CROAB17363-21	Animalia	Arthropoda	Insecta	Diptera	Cecidomyiidae
ESV_428303	BOLD	98.7	CROAB47629-21	Animalia	Arthropoda	Insecta	Diptera	Cecidomyiidae
ESV_428303	BOLD	98.7	CROAC040-21	Animalia	Arthropoda	Insecta	Diptera	Cecidomyiidae
ESV_428303	BOLD	98.7	CROAD1051-22	Animalia	Arthropoda	Insecta	Diptera	Cecidomyiidae
ESV_428303	BOLD	98.7	CROAD16451-22	Animalia	Arthropoda	Insecta	Diptera	Cecidomyiidae
ESV_428303	BOLD	98.7	CROAD30926-22	Animalia	Arthropoda	Insecta	Diptera	Cecidomyiidae
ESV_428303	BOLD	98.7	CROAD380-22	Animalia	Arthropoda	Insecta	Diptera	Cecidomyiidae
ESV_428303	BOLD	98.7	CROAD43607-22	Animalia	Arthropoda	Insecta	Diptera	Cecidomyiidae
ESV_428303	BOLD	98.7	CROAE1936-22	Animalia	Arthropoda	Insecta	Diptera	Cecidomyiidae
ESV_428303	BOLD	98.7	CROCA34299-21	Animalia	Arthropoda	Insecta	Diptera	Cecidomyiidae
ESV_428303	BOLD	98.7	CROCA37858-21	Animalia	Arthropoda	Insecta	Diptera	Cecidomyiidae
ESV_428303	BOLD	98.7	CROAD39089-22	Animalia	Arthropoda	Insecta	Diptera	Cecidomyiidae
ESV_428303	BOLD	98.7	CROCA10127-21	Animalia	Arthropoda	Insecta	Diptera	Cecidomyiidae
ESV_428303	BOLD	98.7	CROCA27411-21	Animalia	Arthropoda	Insecta	Diptera	Cecidomyiidae
ESV_428303	BOLD	98.7	CROCA5468-21	Animalia	Arthropoda	Insecta	Diptera	Cecidomyiidae
ESV_428303	BOLD	98.7	CROCB083-22	Animalia	Arthropoda	Insecta	Diptera	Cecidomyiidae
ESV_428303	BOLD	98.7	CROCB3041-22	Animalia	Arthropoda	Insecta	Diptera	Cecidomyiidae
ESV_428303	BOLD	98.7	CROCB4245-22	Animalia	Arthropoda	Insecta	Diptera	Cecidomyiidae
ESV_428303	BOLD	98.7	CRSRA32007-22	Animalia	Arthropoda	Insecta	Diptera	Cecidomyiidae
ESV_428303	BOLD	98.7	CROCA5088-21	Animalia	Arthropoda	Insecta	Diptera	Cecidomyiidae
ESV_428303	BOLD	98.7	CROCA35859-21	Animalia	Arthropoda	Insecta	Diptera	Cecidomyiidae
ESV_428303	BOLD	98.7	CROCA7595-21	Animalia	Arthropoda	Insecta	Diptera	Cecidomyiidae
ESV_428303	BOLD	98.7	CRSRA5864-22	Animalia	Arthropoda	Insecta	Diptera	Cecidomyiidae
ESV_428303	BOLD	98.7	CRSRA5843-22	Animalia	Arthropoda	Insecta	Diptera	Cecidomyiidae
ESV_428304	BOLD	99.4	GMPAC1314-18	Animalia	Arthropoda	Insecta	Diptera	Cecidomyiidae
ESV_428307	BOLD	96.5	PLEAV060-19	Animalia	Arthropoda	Insecta	Hymenoptera
ESV_428307	BOLD	96.5	PLEAZ368-19	Animalia	Arthropoda	Insecta	Hymenoptera
ESV_428309	BOLD	98.7	CRSIA2155-21	Animalia	Arthropoda	Insecta	Hemiptera	Aleyrodidae
ESV_428309	BOLD	98.7	CRSIA28981-22	Animalia	Arthropoda	Insecta	Hemiptera	Aleyrodidae
ESV_428309	BOLD	98.7	CRSRA16526-22	Animalia	Arthropoda	Insecta	Hemiptera	Aleyrodidae
ESV_428310	BOLD	100	CRBOA11308-23	Animalia	Arthropoda	Insecta	Diptera	Psychodidae	Psychoda
ESV_428310	BOLD	100	CRBOA11774-23	Animalia	Arthropoda	Insecta	Diptera	Psychodidae	Psychoda
ESV_428310	BOLD	100	CRBOA12974-23	Animalia	Arthropoda	Insecta	Diptera	Psychodidae	Psychoda
[truncated: 39,425 more rows]

## Sheet: Table_S4
Table S4. Consensus taxonomy and read counts for each 12S rRNA OTU and sample PCR replicate
OTU	sequence	Kingdom	Phylum	Class	Order	Family	Genus	Species	pctMatch	A1475.1	A1475.10	A1475.11	A1475.12	A1475.2	A1475.3	A1475.4	A1475.5	A1475.6	A1475.7	A1475.8	A1475.9	A1476.1	A1476.10	A1476.11	A1476.12	A1476.2	A1476.3	A1476.4	A1476.5	A1476.6	A1476.7	A1476.8	A1476.9	A1477.1	A1477.10	A1477.11	A1477.12	A1477.2	A1477.3	A1477.4	A1477.5	A1477.6	A1477.7	A1477.8	A1477.9	A1478.1	A1478.10	A1478.11	A1478.12
ESV_000219	CTTAGCCCTAAACCTTAATAATTACATCTACAAAAATATTTGCCAGAGAACTACTAGCTACAGCTTAAAACTCAAAGGACTTGGCGGTACTTTATATCCATCTAGAGGAGCCTGTTCTATAATCGATAAACCCCGTTCTACCTCACCACCTCTTGCTAATTCAGCCTATATACCGCCATCTTCAGCAAACCCTAAAAAGGCACTAAAGTAAGCACAAGAACAAGCATAAAAACGTTAGGTCAAGGTGTAGCCAATGAAGTGGGAAGAAATGGGCTACATTTTCTTTTCAAAGAACATTACGAAACCCTTTATGAAACTAAAGGACAAAGGAGGATTTAGTAGTAAATTAAGAATAGAGAGCTTAATTGAATAGAGCAATGAAGTACGCAC	Eukaryota	Chordata	Mammalia	Rodentia	Muridae	Rattus	Rattus rattus	100	0	0	0	0	0	0	0	0	0	0	0	0	0	0	0	0	0	0	0	0	0	0	0	0	0	0	0	0	0	0	0	0	0	0	0	0	0	0	0	0
ESV_000272	CCTGGCCCTAAATCTTGATACTTACTTTACCGAAGTATCCGCCAGAGAACTACGAGCACAAACGCTTAAAACTCTAAGGACTTGGCGGTGCCCCAAACCCACCTAGAGGAGCCTGTTCTACAATCGATAATCCCCGATTAACCCAACCACCCCTTGCCAACACAGCCTACATACCGCCGTCGCCAGCCCACCTCGAATGAGAGCACAACAGTGGACACAATAGCACCCCGCTAATAAGACAGGTCAAGGTATAGCCTATGGAGTGGAAGAAATGGGCTACATTCCCTATTCATAGGGCACACGGAAAGAAGCGTGAAACCACTTCTGGAAGGCGGATTTAGCAGTAAAGTGGGACAATAGAGCCTACTTTAAGCCGGCCCTGGGGCACGTAC	Eukaryota	Chordata	Aves	Anseriformes	Anatidae	Anser		100	0	0	0	0	0	0	0	0	0	0	0	0	0	0	0	0	0	0	0	0	0	0	0	0	0	0	0	0	0	0	0	0	0	0	0	0	0	0	0	0
ESV_000277	CCTGGCCCTAAATCTCGATGCTTAGCTCACCAAAGCATCCGCCTGAGAACTACGAGCACAAACGCTTAAAACTCTAAGGACTTGGCGGTGCCCCAAACCCACCTAGAGGAGCCTGTTCTATAATCGATAATCCACGATACACCCGACCGTTCCTTGCCAAAGCAGCCTACATACCGCCGTCGCCAGCTCACCTTTCCTGAAAGCACAACAGTGGGCACAATAGCATTAACCTCGCTAACAAGACAGGTCAAGGTATAGCCCATGGGGCGGAAGAAATGGGCTACATTTTCTAAGTTAGAAAACTCCACGAAAAGAGGTGTGAAACCACCCCTAAAAGGCGGATTTAGTAGTAAAGTGGGATAATAGAGCCCCCTTTAAACTGGCCCTGGGGTACGTAC	Eukaryota	Chordata	Aves	Accipitriformes	Cathartidae	Cathartes	Cathartes aura	100	0	0	0	0	0	0	0	0	0	0	0	0	0	0	0	0	0	0	0	0	0	0	0	0	0	0	0	0	0	0	0	0	0	0	0	0	0	0	0	0
ESV_000447	CCTGGCCCTAAATCTTGATGCTTAAACCTACTAAAGCATCCGCCCGAGAACTACGAGCACTAACGCTTAAAACTCTAAGGACTTGGCGGTGCCCCAAACCCACCTAGAGGAGCCTGTTCTGTAATCGATGATCCACGATATACCTGACCATTCCTTGCCAAAAACAGCCTACATACCGCCGTCGCCAGCCCACCTACACTGAAAGCCCAACAGTGGGCGCAATAGCCTCACCACGCTAACAAGACAGGTCAAGGTATAGCCTATGGAATGGAAGTAATGGGCTACATTTTCTAGTATAGAACACCAACGGCAAAGAGACATGAAACTGTCTCTCGAAGGCGGATTTAGCAGTAAAGCGGGACAATCGAGCCCTCTTTAAGCCGGCTCTGGGACACGTAC	Eukaryota	Chordata	Aves	Passeriformes	Passeridae	Passer	Passer domesticus	100	0	0	0	0	0	0	0	0	0	0	0	0	0	0	0	0	0	0	0	0	0	0	0	0	0	0	0	0	0	0	0	0	0	0	0	0	0	0	0	0
ESV_002594	CTTAGCCCTAAACCTTAATAATTAAACCTACAAAATTATTTGCCAGAGAACTACTAGCTACAGCTTAAAACTCAAAGGACTTGGCGGTACTTTATATCCATCTAGAGGAGCCTGTTCTATAATCGATAAACCCCGTTCTACCTTACCCCTTCTCGCTAATTCAGCCTATATACCGCCATCTTCAGCAAACCCTAAAAAGGCACTAAAGTAAGCACAAGAACAAACATAAAAACGTTAGGTCAAGGTGTAGCCAATGAAGCGGAAAGAAATGGGCTACATTTTCTTTTCCCAGAGAACATTACGAAACCCTTTATGAAACTAAAGGACAAAGGAGGATTTAGTAGTAAATTAAGAATAGAGAGCTTAATTGAATAGAGCAATGAAGTACGCAC	Eukaryota	Chordata	Mammalia	Rodentia	Muridae	Rattus	Rattus norvegicus	100	0	0	0	0	0	0	0	0	0	0	0	0	0	0	0	0	0	0	0	0	0	0	0	0	0	0	0	0	0	0	0	0	0	0	0	0	0	0	0	0
ESV_003353	CTTAGACGTTAACATGACACCCTTCCCACATCGGTGCCCGCCAGAGAATTACTAGCGAAAAGCTTAAAACTCAAAGGACTTGGCGGTGCTCCATCCCGACTTAGAGGAGCCTGTCCTATAATCGATAATCCACGATAAACCTCACCATTTTTTGCCACATCAGCCTATATACCGCCGTCGCCAACTTACCCCATGAGGGCCCAAAAGTAAGTACAACAGTCTAACAACTAAAACGTCAGGTCAAGGTGTAGCTAATAAAATGGAAGCGATGGGCTACATTTTTTAATATAAAACACACGGCAAAGTGCCGTGAAACCGGCACTAGAAGGTGGATTTAATAGTAAGATAAACAAGAAAACTTATCTTAAACCCGCTCTGGAGCGCGCAC	Eukaryota	Chordata	Reptilia	Squamata	Iguanidae	Iguana	Iguana iguana	96.6	0	0	0	19	0	745	0	0	0	0	0	0	0	0	0	0	0	0	0	0	0	0	0	0	0	0	0	0	0	0	0	0	0	0	0	0	0	0	0	0
ESV_007815	CTCAGCCTTAAATCTTGGTACTTAACTTACTAAAGTATCCGCCTGAGAACTACGAGCACAAACGCTTAAAACTCTAAGGACTTGGCGGTGCCCCAAACCCACCTAGAGGAGCCTGTTCTATAATCGATAACCCACGATGTACCTGACCACTCCTTGCCAGAGCAGCCTACATACCGCCGTCGCCAGCTTACCTCCCCTGAGAGTACAACAGTGAGCGCAATAGCCCTAACCACGCTAGTAAGACAGGTCAAGGTATAGCCTATGGAGTGGAAGAAATGGGCTACATTTTCTAAATTAGAAAACCTACGGAAGGGGGTGTGAAACCACCTCTAGAAGGCGGATTTAGCAGTAAAGCAGGATTATAAAGCCTACTTTAAACTGGCCCTGGGGCACGTAC	Eukaryota	Chordata	Aves	Pelecaniformes	Ardeidae	Ardea	Ardea cinerea	99	0	0	0	0	0	0	0	0	0	0	0	0	0	0	0	0	0	0	0	0	0	0	0	0	0	0	0	0	0	0	0	0	0	0	0	0	0	0	0	0
ESV_008072	CTTAGCCATAAACCTAAATAATTAAATTTAACAAAACTATTTGCCAGAGAACTACTAGCCATAGCTTAAAACTCAAAGGACTTGGCGGTACTTTATATCCATCTAGAGGAGCCTGTTCTATAATCGATAAACCCCGCTCTACCTCACCATCTCTTGCTAATTCAGCCTATATACCGCCATCTTCAGCAAACCCTAAAAAGGTATTAAAGTAAGCAAAAGAATCAAACATAAAAACGTTAGGTCAAGGTGTAGCCAATGAAATGGGAAGAAATGGGCTACATTTTCTTATAAAAGAACATTACTATACCCTTTATGAAACTAAAGGACTAAGGAGGATTTAGTAGTAAATTAAGAATAGAGAGCTTAATTGAATTGAGCAATGAAGTACGCAC	Eukaryota	Chordata	Mammalia	Rodentia	Muridae	Mus		100	0	0	0	0	0	0	0	0	0	0	0	0	0	0	0	0	0	0	0	0	0	0	0	0	0	0	0	0	0	0	0	0	0	0	0	0	0	0	0	0
ESV_008493	CCCAGCTGTTAATTGATACTAAAAACTAATAGTATTCGCCAGAATATTACGGGCGAAAAGCCTAAAACTCAAAAGACTTGGCGGTGCTTCATATACAACTTAGAGGAGCCTGTCCTATAATCGATAATCCACGATAAACCTAACCACCCCTTGCCAAAACAGCCTATATACCGCCGTCCTCAACTTACACTGTGAAGAGAAAATAGTAAGTAAAAATGTTAAACACAAAAAAGTCAGGTCAAGGTGTAGCTTATGCGGTGGAAGAGATGGGCTACATTTTTTAAAATAAAACACACACGACAAGTGCTATGAAATAAGCACTAAAAGGAGGATTTAATAGTAAAATAAACAAGAATATTTATTTTAAACATGCTCTGAAGCGCGCAC	Eukaryota	Chordata	Reptilia	Squamata	Dactyloidae	Anolis		88.9	0	0	0	0	0	0	0	0	0	0	0	0	0	0	0	0	0	0	0	0	0	0	0	0	0	0	0	0	0	0	0	0	0	0	0	0	0	0	0	0
ESV_008885	CCTGGCCCTAAATCTTGATACTTACCCTACCGAAGTATCCGCCAGAGAACTACGAGCACAAACGCTTAAAACTCTAAGGACTTGGCGGTGCCCTAAACCCACCTAGAGGAGCCTGTTCTGTAATCGATGATCCACGATCAACCCAACCGCCCCTTGCCAAGCACAGCCTACATACCGCCGTCGCCAGCCCACCTCGAATGAGAGCGCAACAGTGGGCGCAACAGCACCCCGCTAATAAGACAGGTCAAGGTATAGCCTATGGGACGGAAGAAATGGGCTACATTCCCTATGCATAGGGCAACACGGAAAGAAGTATGAAACTGCTTCTAGAAGGAGGATTTAGCAGTAAAGCGGGACAATAAAGCTCGCTTTAAGCCGGCCCTAGGGCACGTAC	Eukaryota	Chordata	Aves	Anseriformes	Anatidae			100	0	0	0	0	0	0	0	0	0	0	0	0	0	0	0	0	0	0	0	0	0	0	0	0	0	0	0	462	0	0	0	0	0	0	0	0	0	0	0	0
ESV_011022	CCTGGCCCTAAATCTTGATGCTCTATATAACCAAAGCATCCGCCTGAGAACTACGAGCACAAACGCTTAAAACTCTAAGGACTTGGCGGTGCCCCAAACCCACCTAGAGGAGCCTGTTCTGTAATCGATACTCCACGATACACCCGACCACTTCTTGCCATGGACAGCCTACATACCGCCGTCGCCAGCTCACCTCCTCTGAGAGCACTACAGTGAGCACAACCGCCCTAACCCCGCTAACAAGACAGGTCAAGGTATAGCTTATGAAGTGGAAGAAATGGGCTACATTTTCTAATCTAGAAAATCCCACGAAAAGGGGCATGAAATAGCCCCTAGAAGGCGGATTTAGCAGTAAAGAGGGATAATATAAGCCCCCTTTAAGCTGGCTCTGGGGCACGT…	Eukaryota	Chordata	Aves	Columbiformes	Columbidae	Columba	Columba livia	100	0	0	0	0	0	0	0	0	0	0	0	0	0	0	0	0	0	0	0	0	0	0	0	0	0	333	0	0	0	0	0	0	0	0	0	0	0	0	0	0
ESV_018781	CTTAGCCCTAAACATAAATAATTTTAACATAACAAAATTATCTGCCAGAGAACTACTAGCAACAGCTTAAAACTCAAAGGACTTGGCGGTGCTTTACATCCCTCTAGAGGAGCCTGTTCTGTAATCGATAAACCCCGATAAACCTCACCACTCCTAGCTAAATCAGTCTATATACCGCCATCTTCAGCAAACCCTTAAAAAGGAATAAAAGTAAGCACAATAATTAAGCATAAAAAAGTTAGGTCAAGGTGTAACCTATGAAGTGGAAAGAAATGGGCTACATTTTCTAAGCAAGAACACACTCTTTATACGGAAGTCCTTATGAAAACTAAGGACCAAAGGAGGATTTAGTAGTAAATTAAGAATAGAGAGCTTAATTGAATTGGGCCATGAAGCACG…	Eukaryota	Chordata	Mammalia	Carnivora	Procyonidae	Nasua	Nasua narica	95.3	19792	3852	1781	2051	1027	701	7	511	828	1464	411	1259	0	46	0	166	0	0	0	0	0	0	0	1055	0	156	819	0	0	0	272	0	0	59	0	0	1005	1934	875	2048
ESV_018782	CCTAGCCATAAACATAAAAATTTCATAACAAAAATTCTCGCCCGAGAACTACTAGCCATAGCTTAAAACTCAAAGGACTTGGCGGTGCTTTACACCCACCTAGAGGAGCCTGTTCTATAATCGATAAACCCCGATATACCTCACCACCTCTTGCTAATCCAGTTTATATACCGCCATCTTCAGCAAACCCTATTATGGGACAACAGTAAGCTTAACTATCAATAATAAAAACGTTAGGTCAAGGTGTAGCCCATGAGGTGGGAAGAAATGGGCTACATTTTCTTATCAAAGAACATTTCACGCAAATCCCCATGAAACGGGGGACGCAAGGAGGATTTAGTAGTAAATTAAGAATAGAGAGCTTAATTGAACTAGGCCATGAAGCACGTAC	Eukaryota	Chordata	Mammalia	Rodentia	Dasyproctidae	Dasyprocta	Dasyprocta punctata	94.9	23806	2681	3267	3207	1889	0	1567	320	1161	1111	2629	141	0	952	1226	1	607	681	8070	3257	1317	0	895	657	129	0	0	0	186	0	0	358	0	0	0	0	0	0	0	0
ESV_018785	CCTAGCCCTAAACCCAAACATTTAATCAACTAAAATGTTCGCCAGAGCACTACTAGCAACAGCCTAAAACTTAAAGGACTTGGCGGTGCTTCATACCCCCCTAGAGGAACCTGTCCTATAATCGACATACCCCGATAAACCTCACCACCCCTAGCCAACACAGCCTATATACCGCCATCCCCAGCAAACCTTAGAAAGAACCACAGTAAGCACAACTATTAACCACAAGCACGTTAGGTCAAGGTGTAGCCAATGAGGTGGAAAGAGATGGGTTACATTTTCTTACAAAAGAAAATCAACGAAAGTTTCTATGAAACCCTAGAAACCAAAGGAGGATTTAGAAGTAAATCAAGAATAGAGAGCTTTATTGAACCAGGTCACGAAGCACGCAC	Eukaryota	Chordata	Mammalia	Pilosa	Megalonychidae	Choloepus	Choloepus hoffmanni	100	0	16376	0	0	0	2946	0	0	0	0	0	0	7230	0	1518	0	0	0	0	0	0	0	0	370	0	0	0	0	0	0	0	0	0	0	0	0	2672	0	19	353
ESV_018788	CCTGGCCCTAAATCTTAATACTTGCTTTACCAAAGTATTCGCCTGAGAACTACGAGCACAAACGCTTAAAACTCTAAGGACTTGGCGGTGCCCCAAACCCACCTAGAGGAGCCTGTTCTATAATCGATAACCCACGCTACACCCCACCACTCCTTGCCCAAACAGCCTACATACCGCCGTCGCCAGCTCACCTCTTCTGAGAGCTTAATAGTGAGCTCAATAGCCCCCCCGCTAAAAAGACAGGTCAAGGTATAGCTCACGAAGTGGCAGAAATGGGCTACATTTTCTAAGCTAGAAAACCATACGGAAAGGGGCATGAAATAACCCCTGGAAGGCGGATTTAGCAGTAAACTGGGATAATAAAGCCCTATTTAAGCTGGCCCTGAGGCACGTAC	Eukaryota	Chordata	Aves	Accipitriformes	Accipitridae	Rostrhamus	Rostrhamus sociabilis	99.7	0	3286	0	283	317	0	0	730	0	705	0	82	0	0	0	0	0	0	0	0	0	0	0	0	0	0	0	0	0	0	256	0	0	0	0	0	0	0	0	0
ESV_018790	CTTAGCAGTAAACCCAGGCCACTACTACAACTACCCGCCCCGCCAGAGAACTACAAGTGAAAAACTTAAAACTCAAAGGACTTGACGGTGTCTCACATCACCCTAGAGGAGCCTGTCCTATAATCGATAACCCACGCTCCACCCGACCTGCCCTAGAACTACAAGCCCAGTCTATATACCGCCGCCTTCAGCCCACCTTATGAAAGAACCACAGTGAGCCCAACAGCCACCGCTAACACGTCAGGTCAAGGTGTAGCTAATGGGCAGGAAGAGATGGGCTACATTTTCTATGCATAGAAACCAAAAACCTCATGAACCAGATGTCAAAAGCCGGATTTAGTAGTAAACCGAGCAAATCTGCTCGCTTGAACCGTGCCCTGAGACACGTAC	Eukaryota	Chordata	Reptilia	Squamata	Gekkonidae	Hemidactylus	Hemidactylus frenatus	100	0	1351	0	36	42	0	557	208	0	0	0	0	0	0	0	0	0	0	0	0	0	0	0	0	0	0	0	0	0	0	0	0	0	0	0	0	0	0	0	0
ESV_018791	CTTAGCCGTAAACGTAAAAATTTTACAACAAAAATTTTCGCCCGAGAACTACTAGCAATAGCTTAAAACTCAAAGGACTTGGCGGTGCTTCACACCCACCTAGAGGAGCCTGTTCTATAATCGATACACCCCGATCCACCTCACCACCTCTTGCCAATTCAGCCTATATACCGCCATCTTCAGCAAACCCAATTATGGAACAAAAGTAAGCACAAGCACTTCACGTAAAAACGTTAGGTCAAGGTGTAGCCAATGAAGTGGGAAGAAATGGGCTACATTTTCTTAAACAAAGAACATTAACGCAAGTTTCTATGAAATCTAAAAACCCAAGGAGGATTTAGTAGTAAATTAAGAGTAGAGAGCTTAATTGAATCAGGCCATGAAGCACGTAC	Eukaryota	Chordata	Mammalia	Rodentia	Cuniculidae	Cuniculus	Cuniculus paca	99.5	0	15734	0	758	0	0	0	0	0	1884	0	0	0	5432	0	711	2587	0	0	0	796	2046	0	1719	0	0	0	0	1561	0	220	0	0	0	0	1509	0	0	0	0
ESV_018792	CCCAGCCCTAAACTTTGATGGCATTTTACCCCGCCATCCGCCAGGGAACTACGAGCACTAGCTTAAAACCCAAAGGACTTGGCGGTGCTTTAGACCCCCCTAGAGGAGCCTGTTCTAGAACCGATAACCCCCGTTAAACCTCACCCTCTCTTGTCATCCCCGCCTATATACCGCCGTCGTCAGCTTACCCTGTGAAGGCACCATAGTAAGCAAAACTAGTAAAACCCAAAACGCCAGGTCGAGGTGTAGCATATGAGAGGGAAAGAAATGGGCTACATTCCCTAATTCTAGGGAACACGGATAATGTAATGAAAAAGACATTAGAAGGAGGATTTAGCAGTAAGCAAGAAATAGAGTGTTTTGCTGAAACTGGCCCTGAAGCGCGCAC	Eukaryota	Chordata	Actinopteri	Cichliformes	Cichlidae	Vieja	Vieja melanura	99.2	0	0	589	0	0	0	0	0	0	0	0	1	0	0	0	0	0	0	0	0	0	0	0	0	0	0	0	0	0	0	0	0	0	0	0	0	0	0	0	0
ESV_018798	CCTAGCCCTAAATCTTGGTGCTTGACTCACCAAAGCATCCGCCCGAGAACTACGAGCACAAACGCTTAAAACTCTAAGGACTTGGCGGTGCCCCAAACCCACCTAGAGGAGCCTGTTCTGTAATCGATAACCCACGATACACCCGACCGCTCCTTGCCAAAGCAGCCTACATACCGCCGTCGCCAGCTCACCTTTTCTGAAAGCACAACAGTGAGCGCAATAGCCTCAACCTCGCTAGCAAGACAGGTCAAGGTATAGCCCATGGAGTGGAAGAAATGGGCTACATTTTCTAGATTAGAAAACTTCACGAAAAGGGATGTGAAACCGCCCCTAGAAGGTGGATTTAGCAGTAAAGCGGGACAATAGAGCCCCCTTTAAACCGGCCCCGGGGCACGTAC	Eukaryota	Chordata	Aves	Accipitriformes	Cathartidae	Coragyps	Coragyps atratus	100	0	0	6200	669	593	192	0	432	1056	0	0	0	0	0	0	0	0	0	0	0	0	0	0	69	0	943	0	0	0	0	307	167	0	706	0	0	447	0	0	204
ESV_018799	CTTGGCCATAAACCTAAATGCTTGCTTTACCAAAGCATTCGCCCGAGAACTACGAGCACAAACGCTTAAAACTCTAAGGACTTGGCGGTGCCCTATACCCACCTAGAGGAGCCTGTTCTATAATCGATACTCCACGATTCACCTAACCACCTCTTGCCCTAAGCAGCCTACATACCGCCGTCGCCAGCTTGCCTACTGAAAGAACAACAGCAAGCACAATAGTCCATCACTAGTAAGACAGGTCAAGGTATAGCCCATGAGGTGGAAGAAATGGGCTACATTTTCTAACATAGAACATATCTCCTATTTAACGGAAAAGGAAATGAAACACCCTTAGAAGGCGGATTTAGTAGTAAAGCGGAATCAGAAAGTCCACTTTAAACTGGCCCTAGGGCACGT…	Eukaryota	Chordata	Aves	Tinamiformes	Tinamidae	Crypturellus	Crypturellus soui	97.5	0	0	423	84	0	0	0	0	0	0	0	0	0	0	0	0	0	0	0	0	0	0	0	0	0	0	0	0	0	0	0	0	0	0	0	0	0	0	0	0
ESV_018800	CCTAGCCCTAAATCTCAATACTTACTCCACTAAAGTATTCGCCCGAGAACTACGAGCACAAACGCTTAAAACTCTAAGGACTTGGCGGTGCCCCAAACCCACCTAGAGGAGCCTGTTCTATAACCGATAACCCACGATACACCCAACCACTTCTTGCCAACGCAGCCTACATACCGCCGTCCCCAGCTCACCTCCCCTGAGAGGACAACAGTGAGCACAACAGCCCAACCCGCTAGTAAGACAGGTCAAGGTATAGCCCACGAAGTGGAAGAAATGGGCTACATTTTCTAAAATAGAAAATTTCACGGAAGGGGGTGTGAAACCTCCCCCAGAAGGCGGATTTAGCAGTAAAATGGAACAATAAAGTCCCTTTTAAGTTGGCCCTGAGGCACGTAC	Eukaryota	Chordata	Aves	Gruiformes	Aramidae	Aramus	Aramus guarauna	100	0	0	0	155	0	0	0	133	0	0	0	0	0	0	0	0	0	0	0	0	0	0	0	0	0	0	0	0	0	0	0	0	0	0	0	0	0	0	0	0
ESV_018813	CTTAGCTATAAACACAAATATTTAATAACAAAAATTTTCGCCTGAGAACTACTAGCAATAGCTTAAAACTCAAAGGACTTGGCGGTGCTTTAAACCCATCTAGAGGAGCCTGTTCTATAATCGATAAACCCCGATAGACCTCACCACTTCTCGCTAATTCAGTCTATATACCGCCATCTTCAGCAAACCCTACTAAGGAAAAAAAGTAAGCACAATAACTATCATGAAAACGTTAGGTCAAGGTGTAACCAATGAAGTGGTAAGAAATGGGCTACATTTTCTTATCTAAAGAATAACAAACAGTAGTCTATATGAAACCTATAGGCCTAAGGAGGATTTAGTAGTAAATTAAGAATAGAGAGCTTAATTGAATTAGGCAATAAAGCACGCAC	Eukaryota	Chordata	Mammalia	Rodentia	Echimyidae	Diplomys	Diplomys labilis	98.2	0	0	0	63	0	0	0	0	0	0	0	0	0	0	0	0	0	0	0	0	0	0	0	0	0	0	0	0	0	0	0	0	0	0	0	0	0	0	0	0
ESV_018814	CCTAGCCCTAAACCAGGACATTTAACTAAACTAAAATGTTTGCCAGAGTACTACTAGCAACAGCTTGAAACTCAAAGGACTTGACGGTGCTCCACATCCCCCTAGAGGAACCTGTCCTATAATCGACAAACCCCGATAAACCTCACCACCCCTTGCTAATACAGCCTATATACCGCCATCTCCAGCAAACCTTAAAAAAGCTCTACAGTAAGCACAATTATCATGCATAAGTACGTTAGGTCAAGGTGTAGCCCATGAGGTGGAAAGAGATGGGTTACATTTTCTCAAAAAGAATAACCCACGAAAACTTTTGTGAAATTTCAAAAGCCAAAGGAGGATTTAGAAGTAATTTAAGAATAGAGAGCTTAATTGAACCAGGCCATGAAGCACGTAC	Eukaryota	Chordata	Mammalia	Pilosa	Bradypodidae	Bradypus		100	0	0	0	17707	0	0	0	0	2463	3866	0	0	0	0	0	2254	0	0	0	0	0	0	0	0	0	0	0	0	0	0	0	0	0	0	0	0	0	0	0	0
ESV_018824	CCCAGCCGTAAACTTTAATTTACATTCAAATCGCCAGGGAACTACGAGCTAAGCTTAAAACCCAAAGGACTTGACGGTACCCCATATCCCCCTAGAGGAGCCTGTCCTATAATCGATAATCCACGTTTAACCTCACCATTTCTAGTTAATCAGCCTGTATACCTCCGTCGTCAGCTTACCACGTGAGCGCCAATTAGTGAGCTTAATGTCTTTCACCAACACGTCAGGTCAAGGTGCAGTAAATGAAATGGGAAGAGATGGGCTACACTTTCTATGTTAGAAAAAACGAAAAACTCTATGAAAACTAGTTGGAAGGCGGATTTAGCAGTAAAAAGGAATCAAAATGTCCATTTTAACCCGGCACTGGGGTGTGTAC	Eukaryota	Chordata	Amphibia	Anura	Bufonidae	Rhinella		98.7	0	0	0	0	0	0	0	1165	0	0	0	0	0	0	0	0	0	0	0	0	0	0	0	0	0	0	0	0	0	0	0	0	0	0	0	0	0	0	0	0
ESV_018837	CCTCGCCTTAAATCCTGATGTTTCCACTACTCAAACATCCGCCCGAGAACTACGAGCACAAACGCTTAAAACTCTAAGGACTTGGCGGTGCTCCAAACCCACCTAGAGGAGCCTGTTCTATAATCGATAACCCACGATACACCCAACCACTCCTTGCCAAATCAGCCTATATACCGCCGTCGCCAGCTCACCCCAACCTGAGGGTCCAACAGTGAGCACAATAGCATCCCTCCGCTAATAAGACAGGTCAAGGTATAGCCTATGAAGTGGAAGAAATGGGCTACATTTTCTAGCATAGAAAATCCTACGACAAGGAACATGAAACAATTCCTAAAAGGCGGATTTAGCAGTAAAGCAGGACAATCATGCCTCCTTTAAACTGGCCCTGGAGCACGTAC	Eukaryota	Chordata	Aves	Passeriformes	Tyrannidae	Tyrannus		92.2	0	0	0	0	0	0	0	0	0	843	857	0	0	0	0	0	0	0	0	0	0	0	0	0	0	0	0	0	0	0	0	0	0	0	0	0	0	0	0	0
ESV_018841	CTTAGCCCTAAACATAGATAATTAAATCAACAAAATTATCTGCCAGAGAACTACTAGCAATAGCTTAAAACTCAAAGGACTTGGCGGTGCTTTATACCCCTCTAGAGGAGCCTGTTCTATAATCGATAAACCCCGATAAACCTCACCACTTCTTGCTAAATCAGTCTATATACCGCCATCCTCAGCAAACCCTTTAAAGGAAGAAAAGTAAGCACAATAATCAGCACATAAAAAAGTTAGGTCAAGGTGTAACCTATGAAGTGGGAAGAAATGGGCTACATTTTCTGAACAAGAACATTACATACGAAAGCCTCCATGAAATTAGAGGCCAAAGGTGGATTTAGTAGTAAACCAAGAATAGAGAGCTTGATTGAACAGGGCCATGAAGCACGCAC	Eukaryota	Chordata	Mammalia	Carnivora	Procyonidae	Potos	Potos flavus	95.9	0	0	0	0	0	0	0	0	0	0	2607	0	0	0	0	0	0	0	0	0	0	0	0	0	0	0	0	0	0	0	0	0	0	0	0	0	0	0	0	0
ESV_018851	CCTAGCCCTAAATCTTGATGTTCCCCAAACACAAACATCCGCCCGAGAACTACGAGCACAAACGCTTAAAACTCTAAGGACTTGGCGGTGCCCTAAACCCACCTAGAGGAGCCTGTTCTATAATCGATAACCCACGATCCACCCGACCACTTCTTGCCAAAACAGCCTACATACCGCCGTCCCCAGCCCACCTCCGTGAGAGCACAACAGTGAGCCCAACAGCCCCCACCCCGCTAATAAGACAGGTCAAGGTATAGCCCATGAAGTGGAAGAAATGGGCTACATTTTCTAAAATAGAACACCTAACGAAAAGGGGCCTGAAACCTACCCCAAGAAGGCGGATTTAGCAGTAAAGCGGGATGATCAAGCCCCCTTTAAGCTGGTCCTAGGGCACGTAC	Eukaryota	Chordata	Aves	Psittaciformes	Psittacidae	Amazona	Amazona farinosa	99.5	0	0	0	0	0	0	0	0	0	0	0	0	7367	1573	1166	0	0	0	0	0	0	0	0	0	570	0	0	0	0	0	76	304	0	0	0	92	0	1	0	0
ESV_018856	CCTGGCCCTAAATCTAGATGCTTTCACTACTAAAGCATCCGCCTGGGGACTACGAGCGCAAACGCTTAAAACTCTAAGGACTTGGCGGTGCCCCAAACCCACCTAGAGGAGCCTGTTCTGTAATCGATAACCCACGATGCACCCGACCACTCCTTGCCAAAAACAGCCTACATACCGCCGTCGCCAGCTCACCTCCTCTGAGAGCGTAGCAGTGAGCACAATCGCCCTAACCCCGCTAATAAGACAGGTCAAGGTATAGCCCATGGAGTGGAAGAAATGGGCTACATTTTCTAACCTAGAAAACTCACGGAAGAGGGCATGAAACAGCCCCCAAAAGGCGGATTTAGCAGTAAAGCGGGATAATAAAGCCCCCTTTAAGCCGGCTCTGAGGCACGTAC	Eukaryota	Chordata	Aves	Columbiformes	Columbidae	Leptotila	Leptotila rufaxilla	98.7	0	0	0	0	0	0	0	0	0	0	0	1400	2924	174	0	142	2722	0	2	1407	931	0	0	1214	0	0	0	0	0	0	0	0	0	0	0	0	0	0	0	0
ESV_018867	CCTAGCCCTAAACCTAAATAGTCGACCAACAAGATTATTCGCCAGAGTACTACTAGCAACAGCCTAAAACTCAAAGGACTTGACGGTGCTTCATATCCATCTAGAGGAGCCTGTTCTATAATCGATAAACCCCGATAAACCTCACCAACCCTTGCCAAATCAGCCTATATACCGCCATCTTCAGCAAACCCTAAAAAGGAACAACAGTAAGCACAACTATAATCTATAAAAACGTTAGGTCAAGGTGTAGCCTATGGGTTGGGAAGAAATGGGCTACATTTTCTATATAAGAATATCTACGAAAATTCTTATGAAACTAAGAATTAAAGGAGGATTTAGCAGTAAATTAAGAATAGAGTGCTTAATTGAATTAGGCCACAAAGCACGCAC	Eukaryota	Chordata	Mammalia	Artiodactyla	Tayassuidae	Dicotyles	Dicotyles tajacu	98.7	0	0	0	0	0	0	0	0	0	0	0	0	0	3439	4207	0	0	3962	0	4	2943	0	0	378	1336	0	0	0	280	0	200	0	488	353	0	0	0	0	0	0
ESV_018885	CCTAGCCCTAAATCTAGACGCTTACCCCACTAAAGCCTCCGCCTGAGTATTACGAGCACAAACGCTTAAAACTCTAAGGACTTGGCGGTGTCTCAGACCCACCTAGAGGAGCCTGTCCTATAATCGATAACCCACGATGCACCCAACCACTCCTAGCCAGAGCAGCCTACATACCGCCGTCGCCAGCTCACCTCTACTGAGAGCGCAACAGTGAGCACAACAGCCAAAACCCGCTAGCAAGACAGGTCAAGGTATAGCCAATGGACTGGAAGAGATGGGCTACATTTTCTAAAATAGAACAACACAGAAAGGGACCTGAAACAACCCCTAGAAGGTGGATTTAGCAGTAAATGGGGATTAAAGAGCCCCCTTTAAGCTGGCCCTGGGACACGTAC	Eukaryota	Chordata	Aves	Coraciiformes	Momotidae	Baryphthengus	Baryphthengus martii	98.7	0	0	0	0	0	0	0	0	0	0	0	0	0	0	0	0	0	1456	0	0	0	0	0	74	0	468	0	0	0	0	0	0	0	0	0	0	0	0	0	0
ESV_018895	CCTGGCCCTAAATCTTGATGCTTACCCCAACTAAAGCATCCGCCCGAGAACTACGAGCACCAACGCTTAAAACTCTAAGGACTTGGCGGTGCCCCAAACCCACCTAGAGGAGCCTGTTCTATAATCGATGATCCACGATACACCTGACCATTTCTTGCCAAAACAGCCTACATACCGCCGTCGCCAGCCCACCTCCCCTGAAAGCCCAACAGTGGACGCAACAGCCCCACCACGCTAATACGACAGGTCAAGGTATAGCCTATGGAATGGCAGCAATGGGCTACATTTTCTAGATTAGAACATAACGGCAAAGGGGTATGAAACAACCCCTAGAAGGCGGATTTAGCAGTAAAGTGGGACAATCGAGCCCTCTTTAAGCCGGCCCTGGGGCACGTAC	Eukaryota	Chordata	Aves	Passeriformes				97.7	0	0	0	0	0	0	0	0	0	0	0	0	0	0	0	0	0	1	0	0	1530	0	0	0	0	0	0	0	0	0	0	0	0	0	0	0	0	0	0	0
ESV_018924	CCTAGCCCTAAACCTAAATAATCCAGTAACAACATTATTCGCCAGAGTACTGCTAGCAACAGCCTAAAACGCAAAGCACCGGGCGGTACTTCATACCCATCTAGAGGAGCCTGTTCTATGATCCATAAACCCCCATAAACCTCACCAACCCTTGCCAGTTCAGCCCATGTACCGCCATCCTCAGCAAACCCTAAAAAGGAGCAACAGTAAGCACAACCATGATACACAGAAACGTTAGGTCAAGGTGTAGCCTATGGGTTGGAAAGAAATGGGCGACGTTTTCTACACTAAGAACACCTACGAAAATTCTTGTGAAATTGAGAATCAAAGGAGAATTTAGCAGTAAATTAAGAATACAGTGCTTAACTGAATGAGGCCGTGAAGCACGCAC	Eukaryota	Chordata	Mammalia	Artiodactyla	Tayassuidae	Dicotyles	Dicotyles tajacu	95.4	0	0	0	0	0	0	0	0	0	0	0	0	0	0	0	0	0	0	0	0	0	0	0	0	0	0	0	5621	0	0	0	0	0	1	0	0	0	0	0	0
ESV_018931	CCTAGCCCTAAATCTTGATGTCTCCCAAACACAGACATCCGCCCGAGAACTACGAGCACAAACGCTTAAAACTCTAAGGACTTGGCGGTGCCCTAAACCCACCTAGAGGAGCCTGTTCTATAATCGATAACCCACGATCCACCCGACCACTTCTTGCCAAAACAGCCTACATACCGCCGTCCCCAGCCCACCTCTATGAGAGTACAATAGTGAGCTCAATAGCCCACACCCCGCTAATAAGACAGGTCAAGGTATAGCCTACGAAGTGGTAGAAATGGGCTACATTTTCTAAAATAGAACACCCAACGAAAGGGGGTCTGAAACCTACCCCAAGAAGGCGGATTTAGCAGTAAAGCGGGACAATCAAGCCCCCTTTAAGCCGGTCCTAGGGCACGTAC	Eukaryota	Chordata	Aves	Psittaciformes	Psittacidae	Pionus	Pionus menstruus	99.7	0	0	0	0	0	0	0	0	0	0	0	0	0	0	0	0	0	0	0	0	0	0	0	0	0	0	0	0	2297	0	0	0	0	0	0	0	0	0	0	416
ESV_018934	CCTAGCCCTAAATCTTGATGCTTTCTTTACTCAAGCATCCGCCCGAGAACTACGAGCACAAACGCTTAAAACTCTAAGGACTTGGCGGTACTCCAAACCCACCTAGAGGAGCCTGTTCTATAATCGATAACCCACGATACACCCAACCATCTCTTGCCACATCAGCCTATATACCGCCGTCCCCAGCCCACCCCTAACTGAGTGATTAACAGTGGGCATAATAGTTACACCCCACTAACAAGACAGGTCAAGGTATAGCCCATGAGATGGTAGAAATGGGCTACATTTTCTAACATAGAAAACTACGACAAGGAGCATGAAACTACTCCTAAAAGGCGGATTTAGCAGTAAAACAGGATAATAATGCCTTTTTTAAGCTGGCCCTGGAGTACGTAC	Eukaryota	Chordata	Aves	Passeriformes	Tyrannidae			92.2	0	0	0	0	0	0	0	0	0	0	0	0	0	0	0	0	0	0	0	0	0	0	0	0	0	0	0	0	0	0	766	0	0	666	0	0	0	0	0	0
ESV_018937	CCCGGCCCTAAATCTTGATACTACATCCTACTGAGGTATCCGCCCGAGAACTACGAGCACAAACGCTTAAAACTCTAAGGACTTGGCGGTGTCCCAAACCCACCTAGAGGAGCCTGTTCTATAACCGATACCCCACGCTACACCCAACCGTCTCTAGCCCCAAATCAGCCTACATACCGCCGTCGCCAGCTCACCTCCCCTGAGAGAGCAACAGTGAGCATAATAGTCCCACCCTACTAACAAGACAGGTCAAGGTATAGCTTATGAGCCGGAAGCAATGGGCTACATTTTCTAACACTAGAAAACACGAAAAGGGGCATGAAACTACCCCTAGAAGGCGGATTTAGCAGTAAAGAAAGACAATAAAGCTCTCTTTAAACTGGCTCTGGGACACGTAC	Eukaryota	Chordata	Aves	Cuculiformes	Crotophagidae	Crotophaga		100	0	0	0	0	0	0	0	0	0	0	0	0	0	0	0	0	0	0	0	0	0	0	0	0	0	0	0	0	0	0	0	3644	0	0	0	0	0	0	0	0
ESV_018945	CCCGGCCCTAAATCCCGATGCCCCTCATTACCTGAGCATCCGCCCGGGAACTACGAGCACAAACGCTTAAAACCCTAAGGACTTGGCGGTGTCCCAAAACCCCCTAGAGGAGCCTGTTCTATAATCGATAACCCACGCTACACCCAACCCCTCCTCGCCCTAGCAGCCTATATACCGCCGTCGCCAGCCCACCTCGACATGAGAGCACAACAGTGAGCACAATAATTCTCCCCATTAATAAGACAGGTCAAGGTATAGCCCATGGAGGGGAAGAAATGGGCTACATTCTCTAACTTAGATCATACGAAAGAAGGCCTGAAACAGCCCTCAGAAGGAGGATTTAGCAGTAAAACATGACAATTAAGCCTGTTTTAAGCTGGCCCTGGGACACGTAC	Eukaryota	Chordata	Aves	Piciformes	Ramphastidae	Ramphastos	Ramphastos swainsonii	98.7	0	0	0	0	0	0	0	0	0	0	0	0	0	0	0	0	0	0	0	0	0	0	0	0	0	0	0	0	0	0	0	399	0	0	0	0	0	0	0	0
ESV_018947	CCTGGCCCTAAATCTTGATGCTTACACCTACTAAAGCATCCGCCCGAGAACTACGAGCACCAACGCTTAAAACTCTAAGGACTTGGCGGTGCCCCAAACCCACCTAGAGGAGCCTGTTCTGTAATCGATGATCCACGTTATACCTGACCATTCCTTGCCAAAACAGCCTACATACCGCCGTCGCCAGCCCACCTCCTCTGAAAGTTCAACAGTGAGCGCAATAGCCCCACCACGCTAATAAGACAGGTCAAGGTATAGCCTATGGGATGGTAGTAATGGGCTACATTTTCTAGATTAGAACACAACGGCAAAGGGGTATGAAACAACCCCTGGAAGGCGGATTTAGCAGTAAAGTGGGACAATCGAGCCCTCTTTAAGCCGGCCCTGGGGCACGTAC	Eukaryota	Chordata	Aves	Passeriformes				98.5	0	0	0	0	0	0	0	0	0	0	0	0	0	0	0	0	0	0	0	0	0	0	0	0	0	0	0	0	0	0	0	0	7717	1575	0	0	0	0	0	0
ESV_018961	CCTGGCCGTTAATCCAAATGCTTTCTTACCCAAGCATTCGCCAGGGGATTACGAGCACAAACGCTTAAAACCCTAAGGACTTGGCGGTGTCCCAAACCCACCTAGAGGAGCCTGTTCTATAATCGATAATCCACGCTACACCCAACCCCCCCTTGCAATAAACAGCCTATATACCGCCGTCGTCAGCCCACCTCCACTGAGAGTCCAACAGTGAGCATAACAGCTTCGCCCGCTAAAAAGACAGGTCAAGGTATAGCCCATGGGGAGGAAGAAATGGGCTACATTTTCTGACACAGACAATAACGAAAGAGGACTTGAAACCTATCCTCAGAAGGCGGATTTAGCAGTAAGACATAACCACTATGCTTATCTTAAACTGGCCCTAGGACACGTAC	Eukaryota	Chordata	Aves	Piciformes	Picidae	Melanerpes	Melanerpes carolinus	96.7	0	0	0	0	0	0	0	0	0	0	0	0	0	0	0	0	0	0	0	0	0	0	0	0	0	0	0	0	0	0	0	0	0	0	852	0	0	0	0	0
ESV_018965	CTTAGCCCTAAACATGGATAATTAAATCAACAAAATTATTTGCCAGAGAACTACTAGCAATAGCTTAAAACTCAAAGGACTTGGCGGTGCTTTATACCCCTCTAGAGGAGCCTGTTCTATAATCGATAAACCCCGATAAACCTCACCACTTTTTGCTAAATCAGTCTATATACCGCCATCCTCAGCAAACCCTTTAAAGGAAGAAAAGTAAGCACAATAATTAGCGCATAAAAAAGTTAGGTCAAGGTGTAACCTATGAAGTGGGAAGAAATGGGCTACATTTTCTGAACAAGAACATTATATACGAAAGCCTCCATGAAACTGGAAGCCAAAGGTGGATTTAGTAGTAAATCGAGAATAGAGAGCTTGATTGAATAGGGCCATGAAGCACGCAC	Eukaryota	Chordata	Mammalia	Carnivora	Procyonidae	Potos	Potos flavus	97	0	0	0	0	0	0	0	0	0	0	0	0	0	0	0	0	0	0	0	0	0	0	0	0	0	0	0	0	0	0	0	0	0	0	333	0	0	0	0	0
[truncated: 118 more rows]
[truncated: 632 more columns]

## Sheet: Table_S5
Table S5. Reference database hits for each 12S rRNA OTU
OTU	Database	pctMatch	Identifier	Kingdom	Phylum	Class	Order	Family	Genus	Species
ESV_000219	NCBI	100	NC_012374	Eukaryota	Chordata	Mammalia	Rodentia	Muridae	Rattus	Rattus rattus
[truncated: 491 more rows]
